# Supplementary material for: Metalloproteomics Reveals Multi-Level Stress Response in <em>Escherichia Coli </em>When Exposed to Arsenite
Source: Preprints.org preprint supplement (doi:10.20944/preprints202408.0690.v1), 2024-08-09
Supplement: Supplementary file 1 [file Supplemental_date_tables_for_submission.xlsx]

## Sheet: Supplemental Data Table 1
**Intensities are the sum of three highest peptide intensities for each protein**				arsR 100 uM			arsR Control			AW3110 100 uM AsIII			AW3110 Control			K12 1mM AsIII			K12 100 uM AsIII			K12 Control
				Replicate			Replicate			Replicate			Replicate			Replicate			Replicate			Replicate
Identified Proteins (1840)	Accession Number	Alternate ID	Molecular Weight	a	b	c	a	b	c	a	b	c	a	b	c	a	b	c	a	b	c	a	b	c
Transposase InsH for insertion sequence element IS5U OS=Escherichia coli (strain K12) OX=83333 GN=insH21 PE=3 SV=2	A0A385XJE6 (+10)	insH21	38 kDa	10954000	18283000	10593000	35384000	21838000	26417000	9395400	9784600	10181000	26870000	27311000	22673000	11874000	15016000	10310000	65596000	66335000	73934000	49090000	40466000	40469000
6-phosphogluconate dehydrogenase, decarboxylating OS=Escherichia coli (strain K12) OX=83333 GN=gnd PE=1 SV=2	P00350	gnd	51 kDa	4610000000	5934700000	6329500000	2631400000	1892500000	1921200000	3548200000	3404200000	4015700000	2655100000	2605500000	2577600000	2951300000	4696500000	2799300000	3505500000	2784900000	4476100000	2509100000	2482500000	3119700000
Fumarate reductase flavoprotein subunit OS=Escherichia coli (strain K12) OX=83333 GN=frdA PE=1 SV=3	P00363	frdA	66 kDa	113130000	116060000	87561000	248430000	234790000	191280000	95933000	91277000	71020000	360580000	247000000	291590000	70569000	122090000	56269000	118320000	78647000	87294000	97009000	91017000	70182000
NADP-specific glutamate dehydrogenase OS=Escherichia coli (strain K12) OX=83333 GN=gdhA PE=1 SV=1	P00370	gdhA	49 kDa	299310000	99456000	98620000	55822000	38380000	38819000	104570000	85040000	111260000	58879000	49646000	53690000	107630000	259270000	111670000	155430000	199210000	216080000	159900000	151260000	175330000
Type II NADH:quinone oxidoreductase OS=Escherichia coli (strain K12) OX=83333 GN=ndh PE=1 SV=2	P00393	ndh	47 kDa	151720000	128240000	149180000	126400000	81962000	235960000	192630000	122960000	155600000	72464000	44218000	100160000	145470000	216980000	163360000	140330000	154150000	148870000	146500000	92056000	92128000
Superoxide dismutase [Mn] OS=Escherichia coli (strain K12) OX=83333 GN=sodA PE=1 SV=2	P00448	sodA	23 kDa	13145000000	16416000000	14683000000	3522200000	2978900000	2023500000	7234800000	6480500000	7497900000	517430000	730590000	896720000	7112100000	15179000000	7243500000	1686600000	3446300000	2846400000	1726300000	2211400000	1616200000
Ribonucleoside-diphosphate reductase 1 subunit alpha OS=Escherichia coli (strain K12) OX=83333 GN=nrdA PE=1 SV=2	P00452	nrdA	86 kDa	633740000	680810000	577080000	770180000	609240000	547360000	225030000	103190000	239420000	340450000	393790000	367970000	249810000	343540000	360900000	848490000	648380000	966550000	470260000	498850000	628250000
Maltodextrin phosphorylase OS=Escherichia coli (strain K12) OX=83333 GN=malP PE=1 SV=7	P00490	malP	91 kDa	988090000	1124000000	950380000	1662600000	1233000000	1006700000	244920000	185300000	212350000	1232600000	1086200000	1066400000	147040000	165950000	150010000	627680000	711970000	931410000	602840000	469620000	466540000
Aspartate aminotransferase OS=Escherichia coli (strain K12) OX=83333 GN=aspC PE=1 SV=1	P00509	aspC	44 kDa	1039800000	1189000000	1075900000	886500000	772280000	712430000	919500000	737000000	740130000	860160000	722260000	794560000	1098000000	1310100000	1072300000	1349700000	1576500000	1547600000	1399100000	1714600000	1624500000
Homoserine kinase OS=Escherichia coli (strain K12) OX=83333 GN=thrB PE=1 SV=2	P00547	thrB	34 kDa	9473500	11521000	12988000	52577000	34906000	16364000	28168000	16750000	7991200	10762000	32550000	23722000	5874100	0	7603400	10423000	10696000	9732000	19949000	18543000	12376000
PTS system mannitol-specific EIICBA component OS=Escherichia coli (strain K12) OX=83333 GN=mtlA PE=1 SV=1	P00550	mtlA	68 kDa	542880000	24667000	5280900	81058000	43459000	37992000	536600000	3473800	3982000	66996000	26411000	79546000	44829000	68081000	49130000	107340000	136060000	151830000	115380000	102280000	91872000
Bifunctional aspartokinase/homoserine dehydrogenase 1 OS=Escherichia coli (strain K12) OX=83333 GN=thrA PE=1 SV=2	P00561	thrA	89 kDa	50997000	74964000	54507000	168960000	104700000	81759000	46950000	25486000	48849000	89358000	97459000	108910000	30450000	35300000	22775000	71721000	94758000	118080000	91301000	79868000	72355000
Bifunctional aspartokinase/homoserine dehydrogenase 2 OS=Escherichia coli (strain K12) OX=83333 GN=metL PE=1 SV=3	P00562	metL	89 kDa	27740000	28244000	28737000	24499000	37648000	28964000	23769000	11008000	9871000	30246000	17107000	26058000	0	12672000	16679000	26217000	33005000	34532000	20499000	15899000	21068000
RNA polymerase sigma factor RpoD OS=Escherichia coli (strain K12) OX=83333 GN=rpoD PE=1 SV=2	P00579	rpoD	70 kDa	1078700000	1161700000	997480000	621270000	696750000	595720000	773330000	680790000	713640000	549180000	487760000	588120000	696510000	833790000	664590000	728310000	685720000	735700000	534720000	661980000	622990000
DNA polymerase I OS=Escherichia coli (strain K12) OX=83333 GN=polA PE=1 SV=1	P00582	polA	103 kDa	228020000	296370000	284210000	203920000	1191600000	137520000	158120000	158680000	163370000	150040000	215180000	189010000	259480000	298540000	221260000	288240000	211630000	1803700000	228350000	200940000	223990000
Beta-galactosidase OS=Escherichia coli (strain K12) OX=83333 GN=lacZ PE=1 SV=2	P00722	lacZ	116 kDa	124220000	192620000	136720000	265570000	175580000	145310000	5608600	4061600	4519900	59789000	46882000	66555000	59848000	68755000	59056000	66105000	58226000	84971000	95793000	63270000	59482000
Signal peptidase I OS=Escherichia coli (strain K12) OX=83333 GN=lepB PE=1 SV=2	P00803	lepB	36 kDa	0	0	0	0	0	0	0	0	0	3420600	0	5598600	0	0	0	0	0	3667700	2098900	0	0
L-asparaginase 2 OS=Escherichia coli (strain K12) OX=83333 GN=ansB PE=1 SV=2	P00805	ansB	37 kDa	123870000	176740000	59909000	1340100000	1063900000	907340000	139000000	84282000	93362000	1636000000	1441300000	1333200000	6741000	28720000	16668000	25227000	24360000	30688000	24628000	29630000	39896000
Beta-lactamase OS=Escherichia coli (strain K12) OX=83333 GN=ampC PE=1 SV=1	P00811	ampC	42 kDa	18179000	18552000	24165000	8746300	6081000	0	30657000	144000000	23365000	366760000	0	17066000	20208000	17388000	15786000	4287600	19288000	20073000	5785000	0	20176000
Phosphoenolpyruvate carboxylase OS=Escherichia coli (strain K12) OX=83333 GN=ppc PE=1 SV=1	P00864	ppc	99 kDa	766730000	879250000	902470000	591660000	389820000	300930000	513180000	378680000	419280000	483230000	310460000	517150000	485750000	949220000	480250000	469230000	478360000	565170000	437940000	489850000	412130000
Phospho-2-dehydro-3-deoxyheptonate aldolase, Trp-sensitive OS=Escherichia coli (strain K12) OX=83333 GN=aroH PE=1 SV=4	P00887	aroH	39 kDa	34691000	21439000	54112000	45196000	37644000	28766000	0	0	0	26993000	17817000	25512000	0	2880700	0	15224000	7431200	19900000	26346000	21566000	27434000
Phospho-2-dehydro-3-deoxyheptonate aldolase, Tyr-sensitive OS=Escherichia coli (strain K12) OX=83333 GN=aroF PE=1 SV=1	P00888	aroF	39 kDa	0	0	0	11149000	9105800	9501700	0	0	0	0	0	9189400	0	0	0	0	0	0	0	0	0
Acetolactate synthase isozyme 3 large subunit OS=Escherichia coli (strain K12) OX=83333 GN=ilvI PE=1 SV=2	P00893	ilvI	63 kDa	0	0	40938000	0	0	0	37486000	29961000	0	1893600	1974100	921760	63296000	0	0	0	0	158650000	0	2119400	0
Tryptophan biosynthesis protein TrpCF OS=Escherichia coli (strain K12) OX=83333 GN=trpC PE=1 SV=4	P00909	trpC	49 kDa	0	0	0	1996900	0	0	0	0	0	1131500	1131300	1602300	0	0	0	1830700	2348700	2672500	7201100	16979000	21318000
Deoxyribodipyrimidine photo-lyase OS=Escherichia coli (strain K12) OX=83333 GN=phrB PE=1 SV=1	P00914	phrB	54 kDa	4249800	8007600	10869000	0	1069100	2809000	23235000	0	0	0	0	15081000	0	0	0	0	0	0	0	0	0
D-serine dehydratase OS=Escherichia coli (strain K12) OX=83333 GN=dsdA PE=1 SV=3	P00926	dsdA	48 kDa	55653000	86577000	63694000	82556000	56521000	46328000	37109000	27463000	18873000	102640000	119350000	108040000	34742000	27794000	10428000	49268000	70103000	83121000	35176000	69326000	48056000
Threonine synthase OS=Escherichia coli (strain K12) OX=83333 GN=thrC PE=1 SV=1	P00934	thrC	47 kDa	227290000	243790000	309030000	265820000	163400000	201050000	349100000	297870000	242390000	209560000	168210000	203010000	193040000	275880000	212350000	134440000	190710000	260890000	192840000	141360000	150870000
Cystathionine gamma-synthase OS=Escherichia coli (strain K12) OX=83333 GN=metB PE=1 SV=1	P00935	metB	42 kDa	35604000	40809000	33669000	0	3996100	0	11037000	11068000	13531000	0	0	4740100	0	12196000	0	6599200	0	0	6615000	5720600	5766700
Adenylate cyclase OS=Escherichia coli (strain K12) OX=83333 GN=cyaA PE=1 SV=5	P00936	cyaA	98 kDa	0	0	0	0	0	0	0	0	0	0	0	9310000	0	0	0	0	0	0	4429700	0	0
Xylose isomerase OS=Escherichia coli (strain K12) OX=83333 GN=xylA PE=1 SV=1	P00944	xylA	50 kDa	0	0	0	3164200	0	0	0	2921100	0	3715500	6682600	3152200	7318600	9159300	12551000	48694000	73595000	139340000	43455000	53061000	228290000
Mannose-6-phosphate isomerase OS=Escherichia coli (strain K12) OX=83333 GN=manA PE=1 SV=1	P00946	manA	43 kDa	321530000	387870000	258280000	544720000	384330000	272560000	346830000	299650000	353290000	369200000	317610000	327350000	302570000	445050000	279050000	462530000	407920000	430770000	491510000	437220000	390960000
Tryptophan--tRNA ligase OS=Escherichia coli (strain K12) OX=83333 GN=trpS PE=1 SV=3	P00954	trpS	37 kDa	492930000	1135700000	720730000	494640000	319130000	315270000	479080000	435410000	609090000	375370000	422390000	754400000	277110000	565720000	222390000	401340000	528700000	896740000	346130000	608460000	323920000
Isoleucine--tRNA ligase OS=Escherichia coli (strain K12) OX=83333 GN=ileS PE=1 SV=5	P00956	ileS	104 kDa	882660000	1044500000	915500000	860680000	632120000	573010000	901310000	709910000	946640000	657710000	581550000	680730000	989190000	1290500000	952490000	1113800000	1070300000	1196700000	933500000	909330000	791640000
Alanine--tRNA ligase OS=Escherichia coli (strain K12) OX=83333 GN=alaS PE=1 SV=2	P00957	alaS	96 kDa	822490000	880080000	743160000	788290000	554240000	474550000	658400000	431450000	495750000	583220000	669670000	644820000	480150000	858530000	543340000	798620000	823190000	999470000	741450000	736090000	607930000
Methionine--tRNA ligase OS=Escherichia coli (strain K12) OX=83333 GN=metG PE=1 SV=2	P00959	metG	76 kDa	879270000	1073600000	747790000	787870000	582150000	637130000	868960000	764600000	704670000	675710000	596520000	645770000	419640000	762260000	537360000	768170000	635520000	829610000	600190000	660640000	611680000
Glycine--tRNA ligase alpha subunit OS=Escherichia coli (strain K12) OX=83333 GN=glyQ PE=1 SV=2	P00960	glyQ	35 kDa	568820000	714420000	536510000	807050000	755210000	452120000	364000000	276990000	305070000	470260000	601510000	589500000	254770000	356430000	284100000	552070000	430980000	686410000	805640000	548430000	749230000
Glycine--tRNA ligase beta subunit OS=Escherichia coli (strain K12) OX=83333 GN=glyS PE=1 SV=4	P00961	glyS	77 kDa	746110000	989010000	805070000	874630000	700120000	589630000	270510000	257570000	280670000	599530000	562800000	626540000	222320000	347780000	254150000	1033100000	655310000	923710000	952700000	1012300000	849120000
Glutamine--tRNA ligase OS=Escherichia coli (strain K12) OX=83333 GN=glnS PE=1 SV=3	P00962	glnS	63 kDa	686300000	912400000	592420000	520980000	472940000	395430000	445750000	593320000	575770000	614450000	585180000	481150000	644500000	1068200000	804320000	835800000	1062000000	1220100000	668340000	799120000	918300000
Aspartate--ammonia ligase OS=Escherichia coli (strain K12) OX=83333 GN=asnA PE=1 SV=1	P00963	asnA	37 kDa	12945000	16583000	0	29039000	38363000	36922000	3743400	3938800	0	39886000	36731000	28854000	20486000	17290000	22218000	183900000	274860000	398390000	181190000	181090000	213310000
Carbamoyl phosphate synthase large chain OS=Escherichia coli (strain K12) OX=83333 GN=carB PE=1 SV=2	P00968	carB	118 kDa	60616000	67226000	67718000	89027000	56474000	49404000	43361000	37404000	44294000	33416000	27574000	30959000	48047000	52281000	33346000	30636000	38528000	48659000	37806000	32750000	40291000
Small ribosomal subunit protein bS6 OS=Escherichia coli (strain K12) OX=83333 GN=rpsF PE=1 SV=1	P02358	rpsF	16 kDa	7388900000	8329800000	6848800000	9079100000	7968800000	6315600000	8910900000	8077600000	9172200000	7191300000	6634900000	6817000000	8834800000	11567000000	9123100000	7280100000	7136300000	8968400000	7782200000	8042500000	7585700000
Small ribosomal subunit protein uS7 OS=Escherichia coli (strain K12) OX=83333 GN=rpsG PE=1 SV=3	P02359	rpsG	20 kDa	8379800000	13939000000	7713600000	11101000000	10814000000	6742600000	7620700000	7637700000	10610000000	8639600000	7201700000	7814600000	6937700000	14430000000	9525500000	13076000000	8923300000	13500000000	7378100000	8799700000	8548000000
Large ribosomal subunit protein uL15 OS=Escherichia coli (strain K12) OX=83333 GN=rplO PE=1 SV=1	P02413	rplO	15 kDa	7885800000	8872600000	7393100000	10898000000	7076800000	6493500000	7338400000	6583500000	8223900000	7017000000	6318500000	6927100000	7338200000	9725100000	8015200000	7368500000	7806400000	8974600000	7379500000	8767900000	6612000000
Maltose/maltodextrin transport system permease protein MalF OS=Escherichia coli (strain K12) OX=83333 GN=malF PE=1 SV=1	P02916	malF	57 kDa	0	0	0	0	5204600	33108000	0	0	0	16168000	19162000	28477000	0	0	0	0	0	0	0	0	0
L-arabinose-binding periplasmic protein OS=Escherichia coli (strain K12) OX=83333 GN=araF PE=1 SV=2	P02924	araF	36 kDa	0	0	0	2068300	0	1310800	0	0	0	4948200	0	3301600	8533900	37710000	23329000	56361000	61391000	76859000	54155000	65122000	54036000
Ribose import binding protein RbsB OS=Escherichia coli (strain K12) OX=83333 GN=rbsB PE=1 SV=1	P02925	rbsB	31 kDa	1467100000	1432300000	1247600000	1593500000	1180200000	1012300000	1029800000	1018800000	1031200000	1545800000	1176600000	1343600000	3088600000	4736500000	2930000000	4536100000	5325400000	5339800000	3560000000	3557300000	3206700000
Outer membrane protein TolC OS=Escherichia coli (strain K12) OX=83333 GN=tolC PE=1 SV=3	P02930	tolC	54 kDa	17653000	16298000	21678000	9151800	6816500	2646200	28685000	29727000	33893000	0	0	0	63206000	81397000	56636000	12115000	25130000	10409000	20007000	14342000	12204000
Outer membrane porin F OS=Escherichia coli (strain K12) OX=83333 GN=ompF PE=1 SV=1	P02931	ompF	39 kDa	0	3754900	0	6622500	17239000	15924000	8183700	15024000	12701000	31484000	29962000	55417000	8959500	31164000	30049000	5407900	14455000	17395000	8813200	6961200	9016900
Maltoporin OS=Escherichia coli (strain K12) OX=83333 GN=lamB PE=1 SV=1	P02943	lamB	50 kDa	45058000	64056000	66148000	291990000	171390000	132980000	12898000	8327700	12811000	181470000	143430000	237140000	0	0	0	0	0	0	0	0	0
Chromosomal replication initiator protein DnaA OS=Escherichia coli (strain K12) OX=83333 GN=dnaA PE=1 SV=2	P03004	dnaA	53 kDa	5753300	3089400	0	118690000	40893000	21659000	0	0	0	30980000	32733000	28428000	0	0	17722000	20956000	13678000	36781000	30486000	21986000	14637000
DNA helicase II OS=Escherichia coli (strain K12) OX=83333 GN=uvrD PE=1 SV=1	P03018	uvrD	82 kDa	27296000	28082000	30486000	20880000	34418000	33270000	2259800	0	3472500	36566000	23782000	90866000	120880000	0	2066600	32607000	57644000	60152000	25304000	28276000	37190000
Lactose operon repressor OS=Escherichia coli (strain K12) OX=83333 GN=lacI PE=1 SV=3	P03023	lacI	39 kDa	37480000	42343000	42375000	51114000	31929000	26191000	14008000	4601400	4138500	5118100	4022600	19293000	13822000	20109000	10279000	21372000	30410000	37603000	25303000	23009000	17589000
HTH-type transcriptional regulator GalR OS=Escherichia coli (strain K12) OX=83333 GN=galR PE=1 SV=1	P03024	galR	37 kDa	6885200	21076000	5367700	30157000	15600000	18187000	7648800	0	4273000	25658000	15492000	19305000	0	0	0	19628000	16693000	17043000	27315000	17264000	20680000
Broad specificity amino-acid racemase YgeA OS=Escherichia coli (strain K12) OX=83333 GN=ygeA PE=1 SV=1	P03813	ygeA	25 kDa	96687000	92409000	119060000	74678000	3728800	3935100	3232100	1671500	2612300	53919000	41832000	5496200	38605000	61912000	0	3945800	0	13435000	56123000	7205300	31083000
Protein MioC OS=Escherichia coli (strain K12) OX=83333 GN=mioC PE=1 SV=4	P03817	mioC	16 kDa	217620000	15735000	151800000	0	0	0	13356000	14947000	77089000	74727000	0	91021000	0	0	80284000	139670000	0	0	0	0	0
Maltose operon periplasmic protein OS=Escherichia coli (strain K12) OX=83333 GN=malM PE=3 SV=1	P03841	malM	32 kDa	242060000	273890000	197410000	370260000	341800000	318420000	113620000	117980000	100950000	440470000	399220000	403140000	14327000	20143000	0	31054000	16349000	32147000	38230000	29192000	38909000
4-hydroxy-tetrahydrodipicolinate reductase OS=Escherichia coli (strain K12) OX=83333 GN=dapB PE=1 SV=1	P04036	dapB	29 kDa	254120000	265710000	220070000	200350000	142470000	113740000	176980000	130050000	147000000	116560000	65124000	114680000	241200000	254070000	153570000	171930000	172720000	197100000	146670000	106480000	120550000
GMP synthase [glutamine-hydrolyzing] OS=Escherichia coli (strain K12) OX=83333 GN=guaA PE=1 SV=1	P04079	guaA	59 kDa	1272400000	1373100000	1440600000	1090500000	637930000	552580000	735460000	560220000	852010000	732340000	738510000	593270000	991870000	1094400000	779490000	695010000	707230000	1013700000	790370000	695820000	595760000
Esterase FrsA OS=Escherichia coli (strain K12) OX=83333 GN=frsA PE=1 SV=2	P04335	frsA	47 kDa	162710000	84900000	66030000	101110000	112710000	96273000	0	0	0	0	0	0	109430000	128360000	110510000	117610000	64078000	201930000	108130000	126250000	97449000
Glutathione synthetase OS=Escherichia coli (strain K12) OX=83333 GN=gshB PE=1 SV=1	P04425	gshB	36 kDa	475910000	563400000	470110000	194550000	174840000	135800000	371230000	302450000	323180000	245920000	172090000	130430000	364450000	608490000	396450000	487820000	464870000	547840000	246660000	378920000	372880000
Aromatic-amino-acid aminotransferase OS=Escherichia coli (strain K12) OX=83333 GN=tyrB PE=1 SV=1	P04693	tyrB	44 kDa	180020000	194240000	177410000	182520000	118450000	85743000	142380000	123130000	123980000	117410000	316760000	116580000	124360000	183980000	123240000	181630000	179320000	242350000	191500000	168380000	191860000
Glutamate--tRNA ligase OS=Escherichia coli (strain K12) OX=83333 GN=gltX PE=1 SV=1	P04805	gltX	54 kDa	832880000	1042800000	899980000	1102500000	1253900000	878090000	1194900000	937830000	1029300000	986480000	800870000	1082900000	648960000	1005100000	724840000	1207700000	934340000	1454400000	956590000	1275400000	818260000
Leucine-specific-binding protein OS=Escherichia coli (strain K12) OX=83333 GN=livK PE=1 SV=2	P04816	livK	39 kDa	0	11442000	0	0	0	0	0	0	0	0	0	0	0	0	2459400	0	0	0	0	0	0
Aminopeptidase N OS=Escherichia coli (strain K12) OX=83333 GN=pepN PE=1 SV=2	P04825	pepN	99 kDa	1110800000	1336700000	1017800000	700360000	616800000	540570000	670830000	642410000	697130000	571460000	462340000	561890000	1436000000	1850800000	1090900000	1012700000	1217700000	1160900000	886950000	999540000	909910000
3-deoxy-manno-octulosonate cytidylyltransferase OS=Escherichia coli (strain K12) OX=83333 GN=kdsB PE=1 SV=2	P04951	kdsB	28 kDa	233740000	212150000	253960000	194870000	193110000	169220000	205920000	182390000	237370000	227980000	195300000	197340000	203680000	300640000	229760000	208710000	312260000	329340000	255970000	231790000	276870000
L-threonine dehydratase biosynthetic IlvA OS=Escherichia coli (strain K12) OX=83333 GN=ilvA PE=1 SV=1	P04968	ilvA	56 kDa	5556400	4606400	19661000	0	0	5434300	0	0	0	0	0	0	6608300	0	0	10659000	2632600	10325000	15724000	5582800	6290100
D-ribose pyranase OS=Escherichia coli (strain K12) OX=83333 GN=rbsD PE=1 SV=3	P04982	rbsD	15 kDa	74858000	93363000	40850000	75264000	42843000	37963000	73096000	68348000	45606000	48176000	48053000	51152000	162650000	218640000	166310000	175160000	167560000	199010000	71314000	109820000	53905000
Ribose import ATP-binding protein RbsA OS=Escherichia coli (strain K12) OX=83333 GN=rbsA PE=1 SV=1	P04983	rbsA	55 kDa	24241000	25900000	30157000	24869000	15836000	12667000	12622000	11596000	10217000	18793000	19889000	15530000	38282000	40751000	27349000	35035000	41257000	68512000	23955000	15806000	24602000
RecBCD enzyme subunit RecD OS=Escherichia coli (strain K12) OX=83333 GN=recD PE=1 SV=2	P04993	recD	67 kDa	0	0	0	3742900	6178000	0	5260400	0	0	4196800	4031700	7480500	46867000	9636900	48020000	0	55874000	4795500	57915000	8549200	48975000
Exodeoxyribonuclease 7 large subunit OS=Escherichia coli (strain K12) OX=83333 GN=xseA PE=1 SV=2	P04994	xseA	52 kDa	0	0	0	6962800	0	0	0	0	0	3982900	4387600	13397000	0	0	0	0	0	0	5690700	0	0
Exodeoxyribonuclease I OS=Escherichia coli (strain K12) OX=83333 GN=sbcB PE=1 SV=2	P04995	sbcB	55 kDa	15057000	28992000	20937000	51677000	33917000	22080000	5116000	3263900	7574000	10580000	29582000	25209000	2659900	0	2222900	25713000	21413000	24850000	32293000	20239000	40952000
Dihydroorotase OS=Escherichia coli (strain K12) OX=83333 GN=pyrC PE=1 SV=2	P05020	pyrC	39 kDa	319550000	368150000	310450000	91781000	152510000	108350000	201280000	169820000	179030000	149030000	142350000	165870000	196040000	239020000	168150000	146850000	184980000	243120000	129570000	138990000	124930000
Aminodeoxychorismate synthase component 1 OS=Escherichia coli (strain K12) OX=83333 GN=pabB PE=1 SV=1	P05041	pabB	51 kDa	11486000	3706900	13194000	43657000	14141000	11553000	18979000	12441000	16088000	12893000	6296800	8167300	5253500	0	8580900	0	0	8361100	6652200	0	0
Fumarate hydratase class II OS=Escherichia coli (strain K12) OX=83333 GN=fumC PE=1 SV=1	P05042	fumC	50 kDa	403690000	424210000	381240000	146220000	96696000	79403000	106960000	78702000	80665000	51716000	45909000	63690000	577260000	804980000	737830000	301270000	333750000	433870000	208860000	242090000	209310000
HTH-type transcriptional regulator AppY OS=Escherichia coli (strain K12) OX=83333 GN=appY PE=1 SV=3	P05052	appY	29 kDa	0	0	0	0	2257000	1889900	0	0	0	3727100	5038800	3457700	0	0	0	0	0	0	0	0	0
Polyribonucleotide nucleotidyltransferase OS=Escherichia coli (strain K12) OX=83333 GN=pnp PE=1 SV=3	P05055	pnp	77 kDa	944440000	1179000000	888060000	1311100000	905730000	784820000	972530000	822940000	927140000	1018000000	1294200000	1389500000	789090000	1283300000	895460000	841860000	886690000	1166700000	698460000	791690000	845800000
DNA-3-methyladenine glycosylase 1 OS=Escherichia coli (strain K12) OX=83333 GN=tag PE=1 SV=1	P05100	tag	21 kDa	0	0	0	0	0	0	0	0	0	0	0	6548900	0	0	0	0	0	0	0	7311000	5947800
3-dehydroquinate dehydratase OS=Escherichia coli (strain K12) OX=83333 GN=aroD PE=1 SV=2	P05194	aroD	27 kDa	126260000	142070000	122470000	62091000	35015000	37689000	101430000	102150000	97753000	63362000	45998000	52167000	82962000	130290000	76062000	74592000	82546000	75293000	54133000	63160000	65104000
Protease 3 OS=Escherichia coli (strain K12) OX=83333 GN=ptrA PE=1 SV=1	P05458	ptrA	108 kDa	50035000	42393000	40050000	25566000	5775800	11284000	47916000	50190000	44464000	19018000	18177000	28271000	46502000	48975000	46667000	108800000	21586000	21920000	17209000	19749000	19227000
Erythronate-4-phosphate dehydrogenase OS=Escherichia coli (strain K12) OX=83333 GN=pdxB PE=2 SV=2	P05459	pdxB	41 kDa	329230000	318780000	348090000	246960000	242780000	150320000	284750000	275400000	356710000	217310000	201980000	193440000	219720000	263200000	184110000	216300000	256730000	257930000	222070000	276710000	240140000
Formamidopyrimidine-DNA glycosylase OS=Escherichia coli (strain K12) OX=83333 GN=mutM PE=1 SV=3	P05523	mutM	30 kDa	11039000	56114000	33535000	9055600	16525000	14766000	23708000	12795000	7495700	6506600	7679500	10213000	17160000	36523000	24656000	20306000	29796000	31543000	27592000	26265000	21720000
Bis(5'-nucleosyl)-tetraphosphatase [symmetrical] OS=Escherichia coli (strain K12) OX=83333 GN=apaH PE=1 SV=2	P05637	apaH	31 kDa	58345000	17196000	25513000	3778400	0	0	8146500	0	9226900	2492300	11207000	2557400	0	64355000	41880000	28617000	29453000	0	26039000	28734000	32325000
PTS system glucitol/sorbitol-specific EIIA component OS=Escherichia coli (strain K12) OX=83333 GN=srlB PE=1 SV=1	P05706	srlB	13 kDa	0	27602000	4180700	46302000	24714000	58959000	84737000	121330000	114440000	50451000	59014000	35424000	35918000	78246000	59545000	246540000	200760000	149450000	439740000	153120000	152500000
Sorbitol-6-phosphate 2-dehydrogenase OS=Escherichia coli (strain K12) OX=83333 GN=srlD PE=1 SV=2	P05707	srlD	28 kDa	47361000	206670000	70842000	130560000	94093000	78515000	265600000	327900000	315370000	170600000	149000000	200730000	558630000	767320000	683470000	595260000	299310000	491970000	578560000	813910000	597830000
Type I restriction enzyme EcoKI specificity subunit OS=Escherichia coli (strain K12) OX=83333 GN=hsdS PE=1 SV=1	P05719	hsdS	51 kDa	11558000	8764200	19644000	29157000	11909000	22159000	11861000	3654800	14740000	30830000	47774000	30388000	4440400	10911000	16905000	90941000	93158000	40377000	75527000	23741000	65436000
Dihydroxy-acid dehydratase OS=Escherichia coli (strain K12) OX=83333 GN=ilvD PE=1 SV=5	P05791	ilvD	66 kDa	21990000	24271000	32065000	40670000	46396000	16994000	7330000	53856000	40685000	12083000	10020000	13566000	33801000	34309000	7375400	47450000	13919000	57743000	23065000	31777000	39334000
Ketol-acid reductoisomerase (NADP(+)) OS=Escherichia coli (strain K12) OX=83333 GN=ilvC PE=1 SV=4	P05793	ilvC	54 kDa	95351000	111210000	102250000	67803000	58403000	49859000	39376000	28549000	32794000	15815000	10767000	22460000	69483000	90359000	62926000	40302000	51867000	57492000	59229000	47391000	57768000
Beta-glucuronidase OS=Escherichia coli (strain K12) OX=83333 GN=uidA PE=1 SV=2	P05804	uidA	68 kDa	0	0	0	53068000	12642000	5051300	0	0	0	0	0	6306000	7075200	0	0	37070000	32878000	58413000	13747000	29753000	14866000
HTH-type transcriptional regulator IlvY OS=Escherichia coli (strain K12) OX=83333 GN=ilvY PE=3 SV=1	P05827	ilvY	33 kDa	0	14044000	10625000	0	0	0	0	0	5559800	0	0	0	7392500	0	0	0	3916000	2309500	3205000	0	4169600
tRNA N6-adenosine threonylcarbamoyltransferase OS=Escherichia coli (strain K12) OX=83333 GN=tsaD PE=1 SV=2	P05852	tsaD	36 kDa	63924000	67553000	53989000	97837000	47353000	51423000	68210000	54958000	38377000	80918000	57959000	62956000	11945000	8206000	7540800	23535000	48546000	58623000	57173000	54413000	39832000
Quinone-dependent D-lactate dehydrogenase OS=Escherichia coli (strain K12) OX=83333 GN=dld PE=1 SV=3	P06149	dld	65 kDa	81252000	64689000	88986000	102940000	83560000	47161000	41402000	36320000	43401000	94969000	32589000	45065000	32957000	71982000	36987000	84134000	94626000	137000000	142300000	99073000	111070000
Thioredoxin/glutathione peroxidase BtuE OS=Escherichia coli (strain K12) OX=83333 GN=btuE PE=1 SV=1	P06610	btuE	20 kDa	196020000	261320000	196890000	349810000	263020000	217250000	32518000	27209000	29091000	92671000	47213000	43202000	17018000	10323000	9791600	30939000	32965000	39686000	46761000	40037000	44666000
DNA topoisomerase 1 OS=Escherichia coli (strain K12) OX=83333 GN=topA PE=1 SV=2	P06612	topA	97 kDa	231160000	327370000	255260000	301800000	238530000	346040000	225420000	170190000	215140000	196950000	195790000	198130000	197580000	274600000	195260000	304280000	245160000	273280000	234590000	298720000	151350000
GTPase Era OS=Escherichia coli (strain K12) OX=83333 GN=era PE=1 SV=2	P06616	era	34 kDa	44438000	24973000	36420000	102970000	66016000	48947000	3195300	1959400	15850000	55261000	37758000	62090000	7400500	18596000	11322000	20709000	28212000	54690000	28783000	41759000	34050000
DNA polymerase III subunit tau OS=Escherichia coli (strain K12) OX=83333 GN=dnaX PE=1 SV=1	P06710	dnaX	71 kDa	6313200	2352000	51467000	30701000	25604000	22340000	4241400	0	35417000	15787000	28523000	20704000	0	0	0	11574000	0	15626000	30585000	7620400	0
Glutathione reductase OS=Escherichia coli (strain K12) OX=83333 GN=gor PE=1 SV=1	P06715	gor	49 kDa	548110000	606260000	570380000	411610000	335680000	245510000	413980000	357630000	535690000	287530000	225030000	260670000	540130000	686510000	481220000	330910000	326660000	414160000	288480000	320820000	253920000
Alpha-galactosidase OS=Escherichia coli (strain K12) OX=83333 GN=melA PE=1 SV=1	P06720	melA	51 kDa	0	0	0	37161000	18357000	7682300	0	0	0	30346000	26378000	27486000	0	0	0	82626000	89048000	122390000	59571000	57955000	55878000
Cystathionine beta-lyase MetC OS=Escherichia coli (strain K12) OX=83333 GN=metC PE=1 SV=1	P06721	metC	43 kDa	0	0	10176000	3251400	34230000	4342500	4132100	4342800	24225000	16988000	24178000	21243000	0	0	0	0	0	60194000	13416000	0	8829600
HTH-type transcriptional regulator EbgR OS=Escherichia coli (strain K12) OX=83333 GN=ebgR PE=4 SV=2	P06846	ebgR	36 kDa	0	3686500	0	1615900	0	3405800	0	0	0	4733500	0	0	2918300	6216200	3463100	7396100	5314100	17040000	5264500	18808000	11726000
Evolved beta-galactosidase subunit alpha OS=Escherichia coli (strain K12) OX=83333 GN=ebgA PE=1 SV=4	P06864	ebgA	118 kDa	0	0	0	0	0	5026700	0	0	0	0	0	0	0	0	0	0	0	0	0	0	0
Dihydrolipoyllysine-residue acetyltransferase component of pyruvate dehydrogenase complex OS=Escherichia coli (strain K12) OX=83333 GN=aceF PE=1 SV=3	P06959	aceF	66 kDa	6977300000	10660000000	6790500000	3641700000	2476400000	1837000000	3993100000	3845700000	4337100000	2526100000	1786000000	1991000000	7644700000	8223600000	6340700000	5534300000	6730400000	6145300000	5616100000	5209800000	4335200000
Multifunctional CCA protein OS=Escherichia coli (strain K12) OX=83333 GN=cca PE=1 SV=1	P06961	cca	46 kDa	50381000	65470000	50321000	37205000	29431000	24558000	26609000	21773000	31813000	27556000	19477000	28098000	15127000	40826000	25525000	21468000	26335000	37818000	25740000	28572000	24056000
HTH-type transcriptional regulator DicA OS=Escherichia coli (strain K12) OX=83333 GN=dicA PE=4 SV=1	P06966	dicA	16 kDa	36686000	34162000	34599000	43655000	21800000	24792000	34808000	29452000	34027000	34894000	25322000	49187000	26647000	28100000	23161000	10098000	27718000	35057000	29989000	23880000	23553000
Deoxyuridine 5'-triphosphate nucleotidohydrolase OS=Escherichia coli (strain K12) OX=83333 GN=dut PE=1 SV=2	P06968	dut	16 kDa	208630000	200460000	209040000	290430000	201060000	179710000	177280000	214840000	241880000	213410000	154970000	211050000	153230000	219600000	168360000	232330000	272650000	361570000	239790000	233710000	210150000
Porphobilinogen deaminase OS=Escherichia coli (strain K12) OX=83333 GN=hemC PE=1 SV=2	P06983	hemC	34 kDa	117270000	144440000	103530000	110810000	67076000	31641000	107390000	77636000	110470000	105120000	83131000	113750000	75983000	124950000	82724000	110890000	114000000	143760000	107610000	69924000	83734000
Histidinol-phosphate aminotransferase OS=Escherichia coli (strain K12) OX=83333 GN=hisC PE=1 SV=2	P06986	hisC	39 kDa	18179000	19097000	7924100	68829000	38491000	35518000	36459000	31920000	41694000	38381000	37239000	31887000	11509000	29619000	22005000	37118000	38138000	59436000	40104000	45761000	44568000
Histidine biosynthesis bifunctional protein HisB OS=Escherichia coli (strain K12) OX=83333 GN=hisB PE=1 SV=1	P06987	hisB	40 kDa	106680000	121380000	103640000	119560000	101880000	79571000	144060000	132490000	106660000	100180000	82973000	97750000	108300000	129350000	74235000	101300000	127290000	127670000	109460000	122730000	119650000
Histidinol dehydrogenase OS=Escherichia coli (strain K12) OX=83333 GN=hisD PE=1 SV=5	P06988	hisD	46 kDa	21635000	0	38658000	86802000	29265000	16486000	44494000	38939000	41257000	0	4829700	17939000	24782000	19890000	29538000	16375000	19800000	17374000	13755000	20715000	22826000
Histidine biosynthesis bifunctional protein HisIE OS=Escherichia coli (strain K12) OX=83333 GN=hisI PE=3 SV=3	P06989	hisI	23 kDa	45990000	59306000	43239000	39589000	35216000	30505000	31108000	34496000	35727000	7297300	35839000	35659000	37417000	46345000	26744000	46028000	41791000	61351000	40150000	41369000	56137000
Ribosomal RNA small subunit methyltransferase A OS=Escherichia coli (strain K12) OX=83333 GN=rsmA PE=1 SV=1	P06992	rsmA	30 kDa	123930000	237920000	110150000	134970000	133150000	73224000	192280000	171290000	191930000	106720000	96735000	125240000	160110000	235670000	133070000	137400000	128660000	171670000	118020000	122500000	103240000
HTH-type transcriptional regulator MalT OS=Escherichia coli (strain K12) OX=83333 GN=malT PE=1 SV=2	P06993	malT	103 kDa	95435000	1171100000	64296000	97430000	840830000	764660000	24726000	146460000	126290000	984560000	107660000	84103000	849900000	67979000	1229000000	1034000000	183540000	150190000	26211000	989400000	930220000
Outer membrane porin C OS=Escherichia coli (strain K12) OX=83333 GN=ompC PE=1 SV=1	P06996	ompC	40 kDa	252240000	294110000	238830000	304160000	273080000	225350000	162580000	187780000	114230000	269820000	207190000	378930000	130460000	219670000	169800000	182810000	163670000	236400000	230170000	179250000	184590000
ATP-dependent 6-phosphofructokinase isozyme 2 OS=Escherichia coli (strain K12) OX=83333 GN=pfkB PE=1 SV=2	P06999	pfkB	32 kDa	599590000	645880000	602810000	272730000	234340000	218250000	194700000	143910000	177990000	271440000	205040000	271510000	169260000	144830000	70448000	154840000	120420000	195620000	145040000	155980000	134770000
Lysophospholipase L2 OS=Escherichia coli (strain K12) OX=83333 GN=pldB PE=1 SV=4	P07000	pldB	39 kDa	10148000	24790000	13570000	0	3028400	0	10432000	7940200	4104400	0	5325400	0	2766500	8689600	0	0	4800400	0	2512500	0	0
NAD(P) transhydrogenase subunit alpha OS=Escherichia coli (strain K12) OX=83333 GN=pntA PE=1 SV=2	P07001	pntA	55 kDa	11147000	11899000	9230400	83131000	46342000	36045000	8087300	13898000	13986000	62246000	42825000	59713000	13906000	29408000	15329000	51258000	58836000	60398000	81280000	54610000	49557000
Pyruvate dehydrogenase [ubiquinone] OS=Escherichia coli (strain K12) OX=83333 GN=poxB PE=1 SV=1	P07003	poxB	62 kDa	185810000	289440000	184740000	674840000	497260000	447760000	149680000	134180000	149230000	309740000	294040000	330800000	0	0	0	3426500	0	0	0	0	0
Gamma-glutamyl phosphate reductase OS=Escherichia coli (strain K12) OX=83333 GN=proA PE=1 SV=2	P07004	proA	45 kDa	315290000	325280000	302560000	294500000	210360000	189070000	0	0	0	0	0	0	200100000	291640000	215440000	179660000	241630000	308500000	238140000	252740000	205640000
Peptide chain release factor RF2 OS=Escherichia coli (strain K12) OX=83333 GN=prfB PE=1 SV=3	P07012	prfB	41 kDa	766520000	1138600000	811390000	773480000	757750000	542760000	678660000	615330000	870760000	780260000	494970000	779940000	611680000	837490000	544120000	803050000	899710000	821120000	488420000	515120000	490310000
Succinate dehydrogenase iron-sulfur subunit OS=Escherichia coli (strain K12) OX=83333 GN=sdhB PE=1 SV=1	P07014	sdhB	27 kDa	79076000	83452000	65068000	333480000	201110000	176040000	8305900	0	4827300	18614000	27061000	38280000	88431000	93957000	84329000	713340000	363750000	479310000	941810000	299310000	218750000
T-protein OS=Escherichia coli (strain K12) OX=83333 GN=tyrA PE=1 SV=1	P07023	tyrA	42 kDa	10448000	9146300	3303100	18100000	14637000	20707000	1971300	0	1998400	20713000	4837600	10719000	0	0	0	13144000	3379200	11662000	16127000	13694000	3232400
Protein UshA OS=Escherichia coli (strain K12) OX=83333 GN=ushA PE=1 SV=2	P07024	ushA	61 kDa	110600000	115010000	109790000	121310000	95760000	73973000	64368000	57366000	51323000	105600000	117680000	100600000	90579000	122390000	97581000	133590000	157840000	158240000	128700000	144680000	152950000
Regulatory protein SdiA OS=Escherichia coli (strain K12) OX=83333 GN=sdiA PE=1 SV=2	P07026	sdiA	28 kDa	0	0	7563300	0	20775000	0	0	12877000	3388300	22728000	0	7958400	0	0	0	0	0	0	0	0	0
Sodium/proline symporter OS=Escherichia coli (strain K12) OX=83333 GN=putP PE=1 SV=1	P07117	putP	54 kDa	0	0	0	11455000	4518600	2539300	0	0	0	0	0	0	0	0	0	10486000	20936000	27247000	18161000	4564500	9110800
Valine--tRNA ligase OS=Escherichia coli (strain K12) OX=83333 GN=valS PE=1 SV=2	P07118	valS	108 kDa	1005800000	1188900000	977480000	999090000	656510000	509400000	580740000	640960000	726230000	586160000	461070000	541160000	712520000	1336200000	667070000	1064200000	1057700000	1179000000	851100000	844270000	798850000
Phenylalanine--tRNA ligase beta subunit OS=Escherichia coli (strain K12) OX=83333 GN=pheT PE=1 SV=2	P07395	pheT	87 kDa	685020000	750680000	699090000	884310000	699940000	504380000	474760000	388920000	478760000	572550000	508690000	588770000	530410000	688890000	527320000	669040000	860280000	1070700000	837290000	788590000	709590000
HTH-type transcriptional regulatory protein TyrR OS=Escherichia coli (strain K12) OX=83333 GN=tyrR PE=1 SV=2	P07604	tyrR	58 kDa	38922000	97511000	70892000	65808000	88485000	66411000	15096000	2349300	6480900	41730000	26781000	32846000	17088000	4602200	17854000	212550000	175650000	17901000	35571000	29077000	37581000
3-dehydroquinate synthase OS=Escherichia coli (strain K12) OX=83333 GN=aroB PE=1 SV=1	P07639	aroB	39 kDa	89813000	218810000	209540000	104380000	85203000	35116000	74622000	56258000	23464000	187460000	55971000	71670000	15311000	38707000	5842800000	79869000	7294900000	137160000	92635000	63320000	80153000
RecBCD enzyme subunit RecC OS=Escherichia coli (strain K12) OX=83333 GN=recC PE=1 SV=1	P07648	recC	129 kDa	3432100	0	0	0	0	1430700	2086500	5629400	2603600	7527800	14835000	0	0	2142600	0	1889500	1789000	9960300	3929500	0	2651300
tRNA pseudouridine synthase A OS=Escherichia coli (strain K12) OX=83333 GN=truA PE=1 SV=1	P07649	truA	30 kDa	52216000	72580000	74312000	84486000	25573000	117100000	56011000	65401000	97357000	63234000	9023400	49714000	29598000	107650000	218380000	83852000	161380000	251140000	31262000	50072000	75271000
Thymidine phosphorylase OS=Escherichia coli (strain K12) OX=83333 GN=deoA PE=1 SV=3	P07650	deoA	47 kDa	683950000	883760000	770580000	739560000	575520000	494150000	384120000	395110000	349750000	802490000	635700000	661740000	451780000	501580000	329890000	224520000	194830000	258260000	178620000	170450000	158980000
Formate dehydrogenase H OS=Escherichia coli (strain K12) OX=83333 GN=fdhF PE=1 SV=2	P07658	fdhF	79 kDa	0	0	0	0	0	3761200	0	0	0	1896700	4878500	10579000	0	0	0	0	0	0	0	0	0
1,4-alpha-glucan branching enzyme GlgB OS=Escherichia coli (strain K12) OX=83333 GN=glgB PE=1 SV=1	P07762	glgB	84 kDa	38143000	87531000	40942000	117340000	87060000	67617000	82751000	63967000	21520000	138990000	51365000	66208000	18794000	26036000	14165000	115390000	109020000	128250000	70650000	89683000	97924000
Leucine--tRNA ligase OS=Escherichia coli (strain K12) OX=83333 GN=leuS PE=1 SV=2	P07813	leuS	97 kDa	917110000	1087100000	1122800000	941610000	713760000	596550000	1007300000	1096100000	1002500000	636170000	591640000	653380000	1146600000	1904500000	1543400000	1065700000	869450000	1729900000	802360000	1145800000	1113400000
D-alanine--D-alanine ligase B OS=Escherichia coli (strain K12) OX=83333 GN=ddlB PE=1 SV=3	P07862	ddlB	33 kDa	71145000	83989000	82479000	94886000	62657000	61774000	34606000	33690000	38847000	50472000	60992000	61702000	44252000	68457000	51675000	76983000	64961000	87730000	64327000	63853000	62292000
L-threonine 3-dehydrogenase OS=Escherichia coli (strain K12) OX=83333 GN=tdh PE=1 SV=1	P07913	tdh	37 kDa	1245700000	1197100000	953030000	957210000	450530000	474180000	745220000	713410000	817590000	523450000	305600000	493610000	1245400000	2032700000	958350000	1826400000	1661000000	2115500000	1483700000	1666100000	1680600000
Acetolactate synthase isozyme 1 large subunit OS=Escherichia coli (strain K12) OX=83333 GN=ilvB PE=1 SV=1	P08142	ilvB	60 kDa	2917900	3774400	0	26838000	18924000	19963000	0	0	0	3922700	4478800	8543200	3184000	4801200	7669000	17611000	0	28091000	41748000	27956000	41560000
Phosphoribosylformylglycinamidine cyclo-ligase OS=Escherichia coli (strain K12) OX=83333 GN=purM PE=1 SV=3	P08178	purM	37 kDa	0	3937300	0	24940000	7857600	23734000	0	0	0	5807600	7167100	12837000	0	0	0	3394300	2878400	0	4381300	2657600	3415800
Phosphoribosylglycinamide formyltransferase OS=Escherichia coli (strain K12) OX=83333 GN=purN PE=1 SV=1	P08179	purN	23 kDa	10594000	18016000	11280000	12742000	15649000	21026000	0	0	2732400	0	8650700	21620000	0	0	0	18830000	0	0	0	12838000	12673000
Dihydrofolate synthase/folylpolyglutamate synthase OS=Escherichia coli (strain K12) OX=83333 GN=folC PE=1 SV=2	P08192	folC	45 kDa	66691000	100270000	70707000	99271000	97440000	64056000	28769000	12279000	19714000	71769000	44573000	76180000	25119000	40155000	26969000	57375000	75925000	124080000	52494000	43638000	63958000
Glycerol-3-phosphate transporter OS=Escherichia coli (strain K12) OX=83333 GN=glpT PE=1 SV=1	P08194	glpT	50 kDa	0	0	0	56268000	36924000	28217000	0	0	0	57963000	16992000	52956000	0	91837000	10481000	36574000	15839000	106750000	133450000	31467000	78884000
Isocitrate dehydrogenase [NADP] OS=Escherichia coli (strain K12) OX=83333 GN=icd PE=1 SV=1	P08200	icd	46 kDa	7458200000	8680000000	7951200000	3430800000	2608700000	1956700000	1813500000	1553100000	1691000000	1649800000	1504400000	1648200000	14750000000	21452000000	13920000000	9171000000	10213000000	14074000000	8395400000	7208000000	8082300000
Nitrite reductase (NADH) large subunit OS=Escherichia coli (strain K12) OX=83333 GN=nirB PE=3 SV=4	P08201	nirB	93 kDa	17220000	22827000	9293100	110440000	121820000	87868000	15560000	13716000	8884100	105730000	125450000	83829000	0	0	0	2144800	0	0	0	0	0
L-arabinose isomerase OS=Escherichia coli (strain K12) OX=83333 GN=araA PE=1 SV=3	P08202	araA	56 kDa	0	0	0	0	0	0	0	0	0	0	0	0	0	0	0	0	5228300	6817600	0	9656900	8182900
Ribulokinase OS=Escherichia coli (strain K12) OX=83333 GN=araB PE=1 SV=4	P08204	araB	61 kDa	0	0	227040000	423000000	1387300	0	0	0	0	0	0	0	0	0	0	0	0	294770000	0	2805900	8792800
Orotidine 5'-phosphate decarboxylase OS=Escherichia coli (strain K12) OX=83333 GN=pyrF PE=1 SV=1	P08244	pyrF	26 kDa	160440000	158030000	157290000	145520000	126900000	95135000	95095000	86571000	108870000	112030000	82512000	81207000	76223000	149750000	63073000	102220000	80670000	174010000	95400000	89316000	72882000
Uncharacterized protein YciH OS=Escherichia coli (strain K12) OX=83333 GN=yciH PE=1 SV=1	P08245	yciH	11 kDa	27559000	41364000	4422100	54413000	31886000	30507000	36044000	27832000	47433000	45396000	27881000	33849000	15840000	25964000	23501000	11775000	21371000	37348000	22352000	18610000	14498000
Phenylalanine--tRNA ligase alpha subunit OS=Escherichia coli (strain K12) OX=83333 GN=pheS PE=1 SV=2	P08312	pheS	37 kDa	505660000	638000000	469230000	803680000	540310000	358160000	362050000	309210000	365180000	498070000	452220000	564680000	399670000	599600000	443700000	620580000	657400000	945470000	1220600000	710290000	746830000
2',3'-cyclic-nucleotide 2'-phosphodiesterase/3'-nucleotidase OS=Escherichia coli (strain K12) OX=83333 GN=cpdB PE=1 SV=2	P08331	cpdB	71 kDa	25993000	56092000	38147000	23168000	51653000	48923000	50635000	67210000	62946000	88553000	72567000	75292000	215760000	350970000	181420000	464920000	430550000	588490000	614700000	462630000	471620000
8-oxo-dGTP diphosphatase OS=Escherichia coli (strain K12) OX=83333 GN=mutT PE=1 SV=1	P08337	mutT	15 kDa	13425000	2826400	6085700	1892600	0	1490700	17375000	9218800	20355000	0	0	0	5642900	6755400	0	0	7168900	14769000	2906700	0	8240700
UDP-N-acetylenolpyruvoylglucosamine reductase OS=Escherichia coli (strain K12) OX=83333 GN=murB PE=1 SV=1	P08373	murB	38 kDa	32995000	40088000	26509000	23660000	13838000	20011000	26901000	13526000	15248000	17725000	20234000	29488000	8639000	8031500	20609000	39517000	41486000	67029000	32907000	26016000	50515000
USG-1 protein OS=Escherichia coli (strain K12) OX=83333 GN=usg PE=1 SV=1	P08390	usg	36 kDa	47581000	54349000	87034000	58659000	58427000	24355000	22732000	13909000	28757000	26692000	36620000	17606000	33760000	11548000	30710000	46799000	62008000	59550000	57777000	52283000	27904000
RecBCD enzyme subunit RecB OS=Escherichia coli (strain K12) OX=83333 GN=recB PE=1 SV=1	P08394	recB	134 kDa	2459400	8162800	4167500	2044000	4475900	0	2146400	2129900	5518800	2373900	0	3666200	0	0	0	3267200	4991500	8021900	6924000	5586900	5707500
D-alanyl-D-alanine carboxypeptidase DacC OS=Escherichia coli (strain K12) OX=83333 GN=dacC PE=1 SV=2	P08506	dacC	44 kDa	30340000	39633000	23956000	59883000	45676000	38065000	16769000	14059000	8320900	21746000	18791000	26047000	4662500	9849500	0	13053000	23364000	28811000	43108000	4081900	26655000
Chaperone protein DnaJ OS=Escherichia coli (strain K12) OX=83333 GN=dnaJ PE=1 SV=3	P08622	dnaJ	41 kDa	125360000	173500000	128120000	344550000	281760000	211970000	85081000	72017000	77846000	178100000	163520000	193540000	62877000	136230000	78198000	330150000	182340000	234570000	106210000	72545000	91297000
Lysine-sensitive aspartokinase 3 OS=Escherichia coli (strain K12) OX=83333 GN=lysC PE=1 SV=2	P08660	lysC	49 kDa	14858000	6767400	7545700	21187000	19173000	14432000	4914900	5155800	3470900	11355000	7492900	10190000	0	0	0	5592700	18048000	10396000	8040600	6765600	7058900
Phosphoenolpyruvate-protein phosphotransferase OS=Escherichia coli (strain K12) OX=83333 GN=ptsI PE=1 SV=1	P08839	ptsI	64 kDa	7971900000	7792800000	6005300000	4558200000	4844700000	3218200000	4681500000	4280000000	5268600000	2703000000	2217500000	2613900000	1940500000	2915500000	1833300000	980320000	1037000000	1133000000	912520000	1254900000	961050000
Type I restriction enzyme EcoKI endonuclease subunit OS=Escherichia coli (strain K12) OX=83333 GN=hsdR PE=1 SV=3	P08956	hsdR	134 kDa	41368000	47739000	67367000	125220000	100510000	80096000	38151000	35317000	39345000	89366000	99158000	92994000	52174000	70369000	54343000	316590000	211180000	379130000	254800000	236120000	294220000
Type I restriction enzyme EcoKI methylase subunit OS=Escherichia coli (strain K12) OX=83333 GN=hsdM PE=1 SV=1	P08957	hsdM	59 kDa	60130000	76804000	72082000	123630000	106600000	70576000	62747000	51810000	61817000	104280000	107180000	115090000	93907000	99796000	85908000	179530000	162350000	183370000	148550000	138090000	190890000
Malate synthase A OS=Escherichia coli (strain K12) OX=83333 GN=aceB PE=1 SV=1	P08997	aceB	60 kDa	1246100000	1769700000	1062100000	3655700000	5207900000	3492600000	741840000	672980000	820720000	1036700000	900860000	1130900000	46684000	64071000	59614000	34493000	172590000	251630000	244690000	160480000	168350000
Exodeoxyribonuclease III OS=Escherichia coli (strain K12) OX=83333 GN=xthA PE=1 SV=4	P09030	xthA	31 kDa	280690000	317780000	276060000	284070000	214080000	159180000	117610000	127530000	156510000	140070000	130500000	206960000	135110000	257870000	152070000	270040000	270420000	367850000	276120000	221490000	226370000
Valine--pyruvate aminotransferase OS=Escherichia coli (strain K12) OX=83333 GN=avtA PE=1 SV=3	P09053	avtA	47 kDa	32530000	33540000	30865000	43966000	40980000	27386000	26356000	19657000	26397000	27662000	29300000	29299000	19426000	26385000	23218000	32897000	25892000	42156000	39145000	33366000	28879000
Xylulose kinase OS=Escherichia coli (strain K12) OX=83333 GN=xylB PE=1 SV=1	P09099	xylB	53 kDa	3940800	0	21533000	4591800	7318300	3040100	7664000	16120000	0	0	0	2475400	0	0	0	0	0	0	0	0	0
Uroporphyrinogen-III synthase OS=Escherichia coli (strain K12) OX=83333 GN=hemD PE=3 SV=1	P09126	hemD	28 kDa	0	0	0	10339000	4325200	8006900	0	0	0	7988500	7660000	9071100	0	0	0	0	3399300	0	7363400	9555700	6846500
Protein HemX OS=Escherichia coli (strain K12) OX=83333 GN=hemX PE=1 SV=1	P09127	hemX	43 kDa	11966000	17072000	3361100	37992000	27433000	23367000	0	2023800	0	17916000	6867800	25735000	5565100	8102500	2673000	15662000	10531000	27026000	25662000	6772100	16080000
UDP-glucose 4-epimerase OS=Escherichia coli (strain K12) OX=83333 GN=galE PE=1 SV=1	P09147	galE	37 kDa	249720000	255280000	249720000	139030000	117760000	158900000	97563000	78922000	105270000	72863000	75089000	90685000	308670000	756510000	368060000	347350000	310430000	344330000	233940000	281990000	237130000
Galactose-1-phosphate uridylyltransferase OS=Escherichia coli (strain K12) OX=83333 GN=galT PE=1 SV=2	P09148	galT	40 kDa	56558000	54526000	63502000	103060000	52806000	42740000	39844000	34139000	38110000	28333000	30541000	42153000	144280000	205040000	129040000	146680000	128680000	162720000	143700000	132600000	136210000
Respiratory nitrate reductase 1 alpha chain OS=Escherichia coli (strain K12) OX=83333 GN=narG PE=1 SV=4	P09152	narG	140 kDa	37411000	54828000	31871000	180410000	130270000	129950000	28486000	23204000	47876000	155200000	94968000	270760000	0	0	0	0	0	0	0	0	0
Ribonuclease D OS=Escherichia coli (strain K12) OX=83333 GN=rnd PE=1 SV=1	P09155	rnd	43 kDa	30581000	39991000	26829000	17127000	18644000	18989000	38927000	32818000	52608000	8439700	13538000	26179000	30554000	32753000	24642000	20459000	27637000	15119000	12550000	24700000	19492000
Polyamine aminopropyltransferase OS=Escherichia coli (strain K12) OX=83333 GN=speE PE=1 SV=2	P09158	speE	32 kDa	83280000	82862000	84421000	156040000	110330000	89482000	88916000	71917000	85131000	77571000	80389000	101940000	78353000	120120000	81480000	97069000	121530000	107120000	96566000	108450000	94452000
Protease 7 OS=Escherichia coli (strain K12) OX=83333 GN=ompT PE=1 SV=1	P09169	ompT	36 kDa	9965800	0	0	15477000	11447000	21662000	23698000	25113000	22091000	86032000	62145000	101850000	36339000	50100000	85956000	47704000	65193000	82520000	45258000	47680000	40932000
PTS system N-acetylglucosamine-specific EIICBA component OS=Escherichia coli (strain K12) OX=83333 GN=nagE PE=1 SV=1	P09323	nagE	68 kDa	74880000	101160000	53766000	132640000	115370000	94227000	82525000	62815000	75611000	66711000	61989000	126840000	56240000	111560000	85678000	80653000	80984000	156590000	124670000	79934000	71659000
Protein GrpE OS=Escherichia coli (strain K12) OX=83333 GN=grpE PE=1 SV=1	P09372	grpE	22 kDa	3924400000	3680000000	4522700000	3812600000	2578100000	1093500000	1762700000	1632500000	2004200000	3384600000	1755100000	3300500000	3748000000	5296200000	3725100000	4306500000	4152800000	2214000000	2299800000	1330800000	1193500000
Formate acetyltransferase 1 OS=Escherichia coli (strain K12) OX=83333 GN=pflB PE=1 SV=2	P09373	pflB	85 kDa	12328000000	10295000000	13010000000	14417000000	8588800000	9240000000	9850200000	11540000000	10166000000	10264000000	7211600000	9022800000	3295000000	4803300000	2988800000	2299700000	1911800000	3395600000	1280700000	1551200000	1249100000
Glycerophosphodiester phosphodiesterase, periplasmic OS=Escherichia coli (strain K12) OX=83333 GN=glpQ PE=1 SV=2	P09394	glpQ	41 kDa	25145000	84561000	75891000	304540000	150810000	177010000	202360000	4248300000	215770000	438800000	318860000	482780000	2402400000	2539600000	1464800000	1791300000	1780900000	2751600000	2280700000	2592400000	1583600000
Mannitol-1-phosphate 5-dehydrogenase OS=Escherichia coli (strain K12) OX=83333 GN=mtlD PE=1 SV=3	P09424	mtlD	41 kDa	629050000	410130000	414820000	319450000	443290000	301090000	220440000	181340000	270830000	213990000	180800000	234490000	252310000	250430000	266410000	332930000	393410000	389700000	251710000	391740000	302120000
Bifunctional protein PutA OS=Escherichia coli (strain K12) OX=83333 GN=putA PE=1 SV=3	P09546	putA	144 kDa	68210000	119990000	62067000	629600000	426010000	336220000	15906000	15595000	14442000	70309000	56943000	59878000	64719000	93432000	60805000	965150000	1360200000	1501100000	990900000	1026500000	1197500000
Cell division protein DedD OS=Escherichia coli (strain K12) OX=83333 GN=dedD PE=1 SV=2	P09549	dedD	23 kDa	3714200	7235700	0	0	3194800	2895200	9116400	3969200	5454900	3294400	3336200	3934200	7290600	13080000	12602000	3684100	0	5628700	3555900	3509100	1944200
Lysine/arginine/ornithine-binding periplasmic protein OS=Escherichia coli (strain K12) OX=83333 GN=argT PE=1 SV=3	P09551	argT	28 kDa	235470000	239790000	238300000	221160000	166890000	162280000	15432000	8464000	9060900	0	3738300	4638700	312000000	459100000	387890000	117290000	185340000	258610000	118800000	79424000	103300000
Glutamate synthase [NADPH] large chain OS=Escherichia coli (strain K12) OX=83333 GN=gltB PE=1 SV=3	P09831	gltB	163 kDa	59249000	78786000	51820000	102370000	80461000	51124000	179690000	43529000	71500000	132840000	199550000	299090000	26509000	44377000	23682000	95066000	83175000	125390000	66715000	68800000	63444000
Glutamate synthase [NADPH] small chain OS=Escherichia coli (strain K12) OX=83333 GN=gltD PE=1 SV=3	P09832	gltD	52 kDa	3120000	0	0	62104000	31889000	36854000	20559000	10757000	20292000	53004000	59439000	54430000	11040000	2407700	2719800	45344000	53269000	44840000	26866000	61228000	44918000
ATP-dependent DNA helicase Rep OS=Escherichia coli (strain K12) OX=83333 GN=rep PE=1 SV=3	P09980	rep	77 kDa	6032700	21023000	0	9906400	12881000	13798000	0	0	5615200	0	9560700	12926000	0	0	0	11056000	3770400	20615000	13006000	11534000	12785000
UvrABC system protein A OS=Escherichia coli (strain K12) OX=83333 GN=uvrA PE=1 SV=1	P0A698	uvrA	104 kDa	154340000	167400000	153550000	149240000	114010000	73307000	66196000	69106000	63988000	73268000	57426000	63073000	67957000	101170000	200310000	95674000	101050000	146450000	70518000	78512000	76915000
Acetate kinase OS=Escherichia coli (strain K12) OX=83333 GN=ackA PE=1 SV=1	P0A6A3	ackA	43 kDa	2000400000	2141500000	1717800000	2247200000	1695700000	1361600000	3660900000	3301000000	3806300000	2675700000	2138600000	2281100000	2508800000	3464900000	2535700000	2018400000	2257900000	2431200000	1705600000	1563600000	1508400000
3-isopropylmalate dehydratase large subunit OS=Escherichia coli (strain K12) OX=83333 GN=leuC PE=1 SV=2	P0A6A6	leuC	50 kDa	0	0	0	8326000	5109200	3351900	0	0	0	3428700	0	2470600	0	0	0	8188700	6773500	7601500	11496000	0	8968900
Acyl carrier protein OS=Escherichia coli (strain K12) OX=83333 GN=acpP PE=1 SV=2	P0A6A8	acpP	9 kDa	6218500000	6024500000	5695600000	6860000000	6023600000	5370100000	4892700000	3140300000	4549500000	6037300000	4043300000	5350800000	4256400000	6089600000	5171100000	5455800000	7532100000	7989200000	6469300000	6094900000	4989700000
Alanine racemase, biosynthetic OS=Escherichia coli (strain K12) OX=83333 GN=alr PE=1 SV=1	P0A6B4	alr	39 kDa	20040000	34660000	19859000	27957000	30488000	7605600	31638000	58835000	67576000	19838000	15443000	25289000	33443000	50035000	28629000	45640000	55279000	88760000	41006000	60824000	25780000
Cysteine desulfurase IscS OS=Escherichia coli (strain K12) OX=83333 GN=iscS PE=1 SV=1	P0A6B7	iscS	45 kDa	9344700000	8860900000	8673600000	1087600000	939710000	902480000	6210000000	6913900000	8148800000	1089900000	1046800000	1119100000	7546100000	10413000000	8976900000	697170000	940730000	1182500000	623530000	803990000	710090000
Endonuclease 4 OS=Escherichia coli (strain K12) OX=83333 GN=nfo PE=1 SV=1	P0A6C1	nfo	31 kDa	143620000	160720000	154080000	128030000	112660000	82709000	127180000	130050000	155260000	89646000	89698000	81606000	43010000	50216000	53059000	101370000	89722000	97655000	88705000	92320000	88696000
Acetylglutamate kinase OS=Escherichia coli (strain K12) OX=83333 GN=argB PE=1 SV=1	P0A6C8	argB	27 kDa	0	0	2034900	0	0	0	0	0	0	0	1256800	0	0	0	0	0	0	0	0	0	1424900
3-phosphoshikimate 1-carboxyvinyltransferase OS=Escherichia coli (strain K12) OX=83333 GN=aroA PE=1 SV=1	P0A6D3	aroA	46 kDa	182330000	149290000	108040000	77900000	75600000	45003000	149580000	152030000	102120000	107030000	102250000	117930000	110520000	101650000	80273000	63373000	68523000	80245000	52209000	126860000	49805000
Shikimate kinase 1 OS=Escherichia coli (strain K12) OX=83333 GN=aroK PE=1 SV=2	P0A6D7	aroK	20 kDa	293210000	198310000	299780000	459240000	279760000	280220000	280110000	233710000	250380000	309420000	262870000	374600000	186910000	333370000	295780000	155350000	338720000	353960000	284710000	353110000	302520000
Argininosuccinate synthase OS=Escherichia coli (strain K12) OX=83333 GN=argG PE=1 SV=2	P0A6E4	argG	50 kDa	356850000	403030000	331230000	232780000	169860000	141390000	103590000	74161000	77899000	107210000	67511000	84816000	79273000	109770000	80860000	96094000	107800000	121030000	91879000	105550000	109120000
ATP synthase epsilon chain OS=Escherichia coli (strain K12) OX=83333 GN=atpC PE=1 SV=2	P0A6E6	atpC	15 kDa	103350000	264600000	199420000	176620000	157330000	114660000	77387000	126870000	142240000	130690000	51145000	63748000	216760000	306210000	169500000	368000000	117770000	464700000	152270000	127140000	275370000
ATP-dependent dethiobiotin synthetase BioD 2 OS=Escherichia coli (strain K12) OX=83333 GN=bioD2 PE=3 SV=1	P0A6E9	bioD2	25 kDa	0	0	0	121200000	43765000	38946000	0	0	0	83782000	76830000	58289000	0	0	0	0	0	0	0	0	0
Carbamoyl phosphate synthase small chain OS=Escherichia coli (strain K12) OX=83333 GN=carA PE=1 SV=1	P0A6F1	carA	41 kDa	69931000	72332000	45918000	48275000	28359000	29919000	34685000	26665000	34996000	25039000	19623000	18836000	26473000	36292000	22829000	15990000	26931000	35515000	21656000	12779000	19698000
Glycerol kinase OS=Escherichia coli (strain K12) OX=83333 GN=glpK PE=1 SV=2	P0A6F3	glpK	56 kDa	4340600000	4654600000	4261100000	4104200000	3202200000	2422900000	2671500000	2554700000	2515500000	3069500000	2599300000	2790200000	4383600000	6944500000	4636900000	4741400000	4038500000	4817600000	3836800000	3973300000	3922700000
Chaperonin GroEL OS=Escherichia coli (strain K12) OX=83333 GN=groEL PE=1 SV=2	P0A6F5	groEL	57 kDa	19646000000	21600000000	21330000000	16510000000	10049000000	9780300000	8907600000	9777600000	8921100000	9138200000	7994800000	9151200000	19444000000	27237000000	18855000000	16254000000	20646000000	21720000000	10880000000	11019000000	9059300000
Co-chaperonin GroES OS=Escherichia coli (strain K12) OX=83333 GN=groES PE=1 SV=1	P0A6F9	groES	10 kDa	4522700000	5542500000	5049000000	2719300000	2561500000	2223400000	2725200000	3052000000	3468800000	2142800000	1814400000	2313300000	5752900000	6697600000	4879000000	3939500000	5509600000	5540800000	2450300000	2584300000	2307900000
Nicotinamide-nucleotide amidohydrolase PncC OS=Escherichia coli (strain K12) OX=83333 GN=pncC PE=1 SV=1	P0A6G3	pncC	18 kDa	88612000	139980000	98241000	7572200	55151000	7373400	120860000	94121000	39094000	0	39234000	55629000	67828000	135760000	51622000	34154000	34755000	39832000	88884000	107920000	117000000
ATP-dependent Clp protease proteolytic subunit OS=Escherichia coli (strain K12) OX=83333 GN=clpP PE=1 SV=1	P0A6G7	clpP	23 kDa	2369900000	3491800000	2564400000	2446200000	1487000000	1664600000	1261400000	1119000000	1428600000	975710000	1044400000	1348900000	1293800000	2224500000	1617400000	1083600000	2018700000	2148800000	1974400000	1867100000	1683200000
ATP-dependent Clp protease ATP-binding subunit ClpX OS=Escherichia coli (strain K12) OX=83333 GN=clpX PE=1 SV=2	P0A6H1	clpX	46 kDa	303150000	1553200000	207860000	582130000	492660000	469880000	100730000	84397000	103020000	332700000	342050000	315620000	94337000	179380000	97285000	204580000	814630000	1154900000	443700000	434450000	208090000
ATP-dependent protease ATPase subunit HslU OS=Escherichia coli (strain K12) OX=83333 GN=hslU PE=1 SV=1	P0A6H5	hslU	50 kDa	1152900000	1221000000	1129300000	889600000	699490000	636360000	640880000	497360000	605400000	638580000	508690000	561470000	759150000	828450000	632760000	1079500000	990810000	1171600000	629880000	603010000	567810000
Cytidylate kinase OS=Escherichia coli (strain K12) OX=83333 GN=cmk PE=1 SV=1	P0A6I0	cmk	25 kDa	58332000	56801000	41864000	127340000	78256000	59443000	25861000	24567000	28071000	15619000	29335000	38179000	15047000	21773000	25533000	22253000	46686000	28951000	19599000	25847000	15176000
Pantothenate kinase OS=Escherichia coli (strain K12) OX=83333 GN=coaA PE=1 SV=1	P0A6I3	coaA	36 kDa	82563000	98524000	80888000	78928000	52856000	48882000	32300000	27434000	23802000	63303000	59700000	56189000	29030000	56865000	43444000	92032000	95861000	134280000	82913000	74107000	70696000
Phosphopantetheine adenylyltransferase OS=Escherichia coli (strain K12) OX=83333 GN=coaD PE=1 SV=1	P0A6I6	coaD	18 kDa	54460000	63290000	52006000	5136900	8911700	27223000	44524000	40435000	34386000	9578900	4477700	32900000	29227000	39036000	36515000	31463000	7408900	39586000	14684000	30922000	30716000
Adenylyl-sulfate kinase OS=Escherichia coli (strain K12) OX=83333 GN=cysC PE=1 SV=2	P0A6J1	cysC	22 kDa	4408600	0	0	0	0	0	0	0	0	0	0	0	0	0	0	0	0	0	0	0	0
D-amino acid dehydrogenase OS=Escherichia coli (strain K12) OX=83333 GN=dadA PE=1 SV=1	P0A6J5	dadA	48 kDa	93575000	111300000	73132000	164820000	96586000	78536000	24211000	16000000	24913000	42146000	31947000	55303000	387350000	218370000	351110000	307940000	393950000	698700000	294190000	298470000	237500000
D-alanine--D-alanine ligase A OS=Escherichia coli (strain K12) OX=83333 GN=ddlA PE=1 SV=1	P0A6J8	ddlA	39 kDa	212740000	256910000	218940000	286870000	224360000	174020000	243310000	206710000	246790000	217560000	226390000	188960000	226930000	304180000	207380000	527550000	467810000	525900000	419250000	443960000	407530000
Diaminopimelate epimerase OS=Escherichia coli (strain K12) OX=83333 GN=dapF PE=1 SV=1	P0A6K1	dapF	30 kDa	10479000	10657000	8359600	9585000	9260700	7085900	10112000	6876400	8178700	9148900	8436900	23001000	7843400	10485000	7832500	48073000	10910000	14333000	9663100	12165000	0
Peptide deformylase OS=Escherichia coli (strain K12) OX=83333 GN=def PE=1 SV=2	P0A6K3	def	19 kDa	426050000	342850000	292790000	289850000	193840000	226860000	283590000	145890000	167980000	150290000	203260000	143480000	260300000	452070000	213410000	173770000	171900000	167180000	184570000	165930000	256900000
Phosphopentomutase OS=Escherichia coli (strain K12) OX=83333 GN=deoB PE=1 SV=1	P0A6K6	deoB	44 kDa	5085100000	5115600000	3714000000	2289400000	1860100000	1766700000	2891100000	3046800000	2940100000	1945900000	1568600000	2165000000	3367000000	3967900000	3363300000	1236900000	986480000	1316100000	940710000	1049200000	1042500000
Deoxyribose-phosphate aldolase OS=Escherichia coli (strain K12) OX=83333 GN=deoC PE=1 SV=1	P0A6L0	deoC	28 kDa	2862700000	2129600000	2384600000	4169600000	2322400000	1719000000	1604500000	1689600000	1615300000	1815600000	3109800000	1599000000	1395200000	1345100000	987960000	848460000	955240000	967020000	518530000	462870000	664050000
4-hydroxy-tetrahydrodipicolinate synthase OS=Escherichia coli (strain K12) OX=83333 GN=dapA PE=1 SV=1	P0A6L2	dapA	31 kDa	818760000	888050000	856250000	908820000	710590000	402080000	920230000	728410000	944770000	667210000	660720000	727150000	779060000	1167700000	804620000	803050000	946720000	1182900000	985370000	949760000	676350000
N-acetylneuraminate lyase OS=Escherichia coli (strain K12) OX=83333 GN=nanA PE=1 SV=2	P0A6L4	nanA	33 kDa	51720000	161720000	6985000	1292500000	771860000	586070000	51929000	50958000	57889000	816490000	781680000	625470000	84331000	56436000	82608000	340770000	705680000	523940000	220940000	785910000	573600000
Altronate oxidoreductase OS=Escherichia coli (strain K12) OX=83333 GN=uxaB PE=1 SV=1	P0A6L7	uxaB	55 kDa	2580700	0	0	19035000	41819000	29747000	3635200	3484000	4406600	38785000	34861000	24482000	0	0	0	5020300	3639600	7091400	3943700	0	13808000
Co-chaperone protein HscB OS=Escherichia coli (strain K12) OX=83333 GN=hscB PE=1 SV=1	P0A6L9	hscB	20 kDa	299290000	515440000	369680000	87251000	3955600	15783000	437930000	372260000	498720000	38906000	37968000	68917000	229160000	469300000	246190000	25892000	25908000	36289000	20678000	33176000	21701000
D-aminoacyl-tRNA deacylase OS=Escherichia coli (strain K12) OX=83333 GN=dtd PE=1 SV=1	P0A6M4	dtd	16 kDa	34468000	45048000	33023000	78799000	22038000	42124000	38481000	30064000	29190000	62643000	41819000	48564000	40781000	19673000	20703000	58741000	82516000	47349000	61258000	35171000	44432000
Elongation factor G OS=Escherichia coli (strain K12) OX=83333 GN=fusA PE=1 SV=2	P0A6M8	fusA	78 kDa	11717000000	11367000000	9759400000	13789000000	11151000000	8649200000	7186100000	6397700000	7309000000	7432700000	7923000000	7932200000	9339200000	13147000000	6706100000	7286500000	10717000000	10100000000	6651600000	7874100000	10426000000
Elongation factor P OS=Escherichia coli (strain K12) OX=83333 GN=efp PE=1 SV=2	P0A6N4	efp	21 kDa	1474300000	1830900000	1603100000	1823200000	1251800000	1139700000	942580000	793300000	1233500000	1285500000	1188900000	1323900000	880560000	1584800000	1088300000	1642400000	1972000000	1976600000	1676100000	1595900000	824020000
Elongation factor P-like protein OS=Escherichia coli (strain K12) OX=83333 GN=yeiP PE=1 SV=1	P0A6N8	yeiP	22 kDa	280990000	370730000	284650000	409740000	273710000	248100000	204390000	229030000	231070000	309180000	174130000	303540000	208080000	330230000	232450000	429670000	614320000	475080000	515410000	567980000	498850000
Elongation factor Ts OS=Escherichia coli (strain K12) OX=83333 GN=tsf PE=1 SV=2	P0A6P1	tsf	30 kDa	6937200000	7785700000	6905500000	9300000000	6810500000	5988900000	3426800000	2900500000	3690200000	6094500000	5368800000	6337500000	5434900000	7005400000	5603800000	6906200000	8420400000	10980000000	8476300000	4898800000	7060900000
GTPase Der OS=Escherichia coli (strain K12) OX=83333 GN=der PE=1 SV=1	P0A6P5	der	55 kDa	116200000	136650000	106890000	196800000	136600000	112320000	29955000	22533000	40715000	109270000	85584000	112340000	32423000	48661000	39446000	79279000	72188000	84950000	56242000	77695000	69760000
Probable GTP-binding protein EngB OS=Escherichia coli (strain K12) OX=83333 GN=engB PE=1 SV=1	P0A6P7	engB	24 kDa	164840000	278390000	213490000	185530000	206020000	112670000	117420000	108410000	178120000	139910000	95709000	145970000	189310000	383420000	181230000	248370000	166050000	292950000	253380000	244940000	238650000
Enolase OS=Escherichia coli (strain K12) OX=83333 GN=eno PE=1 SV=2	P0A6P9	eno	46 kDa	14999000000	17806000000	15941000000	19242000000	13840000000	11163000000	8239000000	8814900000	10390000000	11326000000	10963000000	6668400000	7556700000	11945000000	11400000000	7164000000	9011900000	12023000000	7740100000	13152000000	9018900000
3-hydroxydecanoyl-[acyl-carrier-protein] dehydratase OS=Escherichia coli (strain K12) OX=83333 GN=fabA PE=1 SV=2	P0A6Q3	fabA	19 kDa	971580000	1207900000	884960000	1657300000	1293600000	1190100000	820230000	675940000	796160000	1349800000	1417800000	1123300000	820380000	1023400000	850960000	1550100000	1426000000	1898200000	1501300000	1543800000	1684100000
3-hydroxyacyl-[acyl-carrier-protein] dehydratase FabZ OS=Escherichia coli (strain K12) OX=83333 GN=fabZ PE=1 SV=1	P0A6Q6	fabZ	17 kDa	437590000	668550000	394480000	1208000000	793940000	827630000	496820000	496350000	696440000	941120000	679720000	882810000	135660000	944350000	537260000	1129200000	1406100000	1367500000	710630000	1182500000	760210000
Beta-ketoacyl-[acyl-carrier-protein] synthase III OS=Escherichia coli (strain K12) OX=83333 GN=fabH PE=1 SV=1	P0A6R0	fabH	34 kDa	641680000	1008800000	619180000	719710000	587300000	435780000	432280000	492700000	749980000	509230000	349640000	416960000	499270000	796870000	505530000	703620000	842010000	1093700000	509140000	631920000	507600000
DNA-binding protein Fis OS=Escherichia coli (strain K12) OX=83333 GN=fis PE=1 SV=1	P0A6R3	fis	11 kDa	161600000	213230000	168560000	377350000	241160000	218300000	208970000	109830000	301260000	228080000	221740000	221900000	394790000	283860000	459040000	173510000	187170000	245560000	125470000	155200000	125500000
Glycerol-3-phosphate dehydrogenase [NAD(P)+] OS=Escherichia coli (strain K12) OX=83333 GN=gpsA PE=3 SV=1	P0A6S7	gpsA	36 kDa	210360000	251670000	244110000	275730000	200690000	200320000	80889000	78028000	96802000	145640000	199900000	199050000	91636000	104970000	81394000	152400000	177830000	155560000	135060000	141150000	107900000
Glucose-6-phosphate isomerase OS=Escherichia coli (strain K12) OX=83333 GN=pgi PE=1 SV=1	P0A6T1	pgi	62 kDa	2470100000	2911500000	2522000000	2135600000	1827900000	1549600000	1287900000	1515200000	1710300000	1066400000	889610000	682030000	1739000000	2270000000	1749700000	1445500000	1069200000	2224000000	1495600000	1473800000	1342500000
Galactokinase OS=Escherichia coli (strain K12) OX=83333 GN=galK PE=1 SV=2	P0A6T3	galK	41 kDa	131050000	132730000	122860000	284340000	129840000	128810000	81718000	65412000	65147000	158200000	104440000	141560000	232950000	335180000	194460000	372270000	442100000	490450000	394910000	328780000	345590000
GTP cyclohydrolase 1 OS=Escherichia coli (strain K12) OX=83333 GN=folE PE=1 SV=2	P0A6T5	folE	25 kDa	486820000	498940000	465320000	211430000	168080000	108270000	467690000	223890000	321190000	182740000	161650000	207480000	349770000	493860000	350660000	272330000	390780000	385500000	310570000	372210000	238600000
Glycine cleavage system H protein OS=Escherichia coli (strain K12) OX=83333 GN=gcvH PE=1 SV=2	P0A6T9	gcvH	14 kDa	830230000	750680000	748160000	251040000	243340000	260730000	473940000	466940000	490710000	324760000	260230000	208860000	649370000	827850000	483810000	325350000	433950000	367280000	382090000	406150000	369940000
tRNA uridine 5-carboxymethylaminomethyl modification enzyme MnmG OS=Escherichia coli (strain K12) OX=83333 GN=mnmG PE=1 SV=1	P0A6U3	mnmG	70 kDa	65688000	109860000	70551000	74363000	83824000	46301000	63929000	45887000	98031000	75609000	83883000	72871000	29959000	23288000	51732000	60928000	84900000	89835000	83048000	60927000	74676000
Ribosomal RNA small subunit methyltransferase G OS=Escherichia coli (strain K12) OX=83333 GN=rsmG PE=1 SV=1	P0A6U5	rsmG	23 kDa	2911600	7929400	10046000	12508000	15052000	11516000	5635400	0	3006100	12166000	9516300	13311000	0	3042800	1910900	10697000	6868000	17917000	13503000	6088500	5853400
Glycogen synthase OS=Escherichia coli (strain K12) OX=83333 GN=glgA PE=1 SV=1	P0A6U8	glgA	53 kDa	42988000	49813000	43074000	73232000	120080000	36037000	11027000	1733600	11427000	110310000	99047000	69714000	22783000	19004000	12563000	75528000	81046000	114000000	82081000	48930000	102290000
Glucose-1-phosphate adenylyltransferase OS=Escherichia coli (strain K12) OX=83333 GN=glgC PE=1 SV=2	P0A6V1	glgC	49 kDa	34452000	52207000	25946000	360190000	213060000	163800000	52024000	44384000	52942000	217830000	185480000	216350000	37303000	42970000	39484000	231780000	313150000	295340000	334100000	372770000	316750000
Thiosulfate sulfurtransferase GlpE OS=Escherichia coli (strain K12) OX=83333 GN=glpE PE=1 SV=1	P0A6V5	glpE	12 kDa	7509400	8526800	0	0	0	3597300	0	4028500	0	5073600	3386000	3377400	16120000	9297700	12763000	7329900	6860500	0	5620900	5735000	0
Glucokinase OS=Escherichia coli (strain K12) OX=83333 GN=glk PE=1 SV=1	P0A6V8	glk	35 kDa	232980000	248560000	214620000	277220000	225230000	203480000	149820000	160930000	170320000	206780000	193440000	189260000	39050000	87209000	47576000	97921000	110270000	153540000	89290000	85496000	90151000
Glutaminase 2 OS=Escherichia coli (strain K12) OX=83333 GN=glsA2 PE=1 SV=1	P0A6W0	glsA2	34 kDa	0	0	0	7055500	0	0	3696100	5179800	6241500	7835000	10819000	9783100	0	0	1515800	2866500	0	11110000	0	1933000	6782800
Transcription elongation factor GreA OS=Escherichia coli (strain K12) OX=83333 GN=greA PE=1 SV=1	P0A6W5	greA	18 kDa	506830000	499710000	534910000	543270000	535280000	437960000	304470000	342090000	383490000	429520000	428000000	426290000	384600000	513360000	401940000	425770000	484190000	590480000	491310000	522550000	460610000
Glutamate--cysteine ligase OS=Escherichia coli (strain K12) OX=83333 GN=gshA PE=1 SV=1	P0A6W9	gshA	58 kDa	204000000	216600000	192150000	171970000	120620000	115000000	188720000	172530000	151200000	127870000	119640000	119200000	104980000	150090000	100210000	140050000	119190000	213870000	122620000	115450000	107490000
RNA-binding protein Hfq OS=Escherichia coli (strain K12) OX=83333 GN=hfq PE=1 SV=2	P0A6X3	hfq	11 kDa	0	30602000	25297000	59204000	0	0	18297000	16575000	45310000	18521000	701690	38785000	63759000	56350000	11977000	64536000	49774000	61545000	0	0	32841000
Integration host factor subunit alpha OS=Escherichia coli (strain K12) OX=83333 GN=ihfA PE=1 SV=1	P0A6X7	ihfA	11 kDa	1651400000	1974400000	1686600000	2264000000	1748400000	1418300000	1549100000	1383300000	1303300000	1274800000	1197800000	1188400000	1294000000	1956300000	1182600000	1172900000	1171700000	1349800000	1060600000	1181100000	1042200000
Integration host factor subunit beta OS=Escherichia coli (strain K12) OX=83333 GN=ihfB PE=1 SV=1	P0A6Y1	ihfB	11 kDa	1593800000	2211100000	2056200000	1554300000	1480000000	1492500000	1473600000	692890000	682480000	823200000	706500000	540730000	977580000	1001200000	1100600000	818170000	1328800000	797910000	1027500000	1056300000	960910000
33 kDa chaperonin OS=Escherichia coli (strain K12) OX=83333 GN=hslO PE=1 SV=1	P0A6Y5	hslO	33 kDa	439450000	734950000	384180000	423520000	333730000	311030000	236310000	294830000	351800000	227080000	192740000	238280000	419990000	672190000	419400000	439550000	569020000	647580000	206760000	217820000	391660000
Chaperone protein DnaK OS=Escherichia coli (strain K12) OX=83333 GN=dnaK PE=1 SV=2	P0A6Y8	dnaK	69 kDa	6531900000	7837100000	9604700000	6923100000	5214800000	4873800000	6099600000	5039100000	6207900000	4208600000	4753700000	5221500000	10624000000	16161000000	10717000000	7878000000	10974000000	13287000000	4294600000	4320300000	3985200000
Chaperone protein HscA OS=Escherichia coli (strain K12) OX=83333 GN=hscA PE=1 SV=1	P0A6Z1	hscA	66 kDa	653190000	908980000	647740000	176080000	165260000	109450000	430330000	318570000	341360000	136420000	147140000	131550000	495990000	568150000	453900000	240800000	165250000	189340000	84200000	84498000	113680000
Chaperone protein HtpG OS=Escherichia coli (strain K12) OX=83333 GN=htpG PE=1 SV=1	P0A6Z3	htpG	71 kDa	2542300000	2661200000	2553000000	1887000000	1344800000	1217700000	1273300000	1029000000	1256300000	1071100000	996180000	1148200000	2066300000	2846500000	2371000000	2354500000	2426100000	3036300000	1318200000	1327200000	1271100000
Translation initiation factor IF-2 OS=Escherichia coli (strain K12) OX=83333 GN=infB PE=1 SV=1	P0A705	infB	97 kDa	725580000	947330000	513620000	1138300000	908680000	911990000	115590000	126210000	145480000	1092200000	955440000	673970000	165880000	176810000	203600000	635350000	612320000	714750000	612630000	741360000	580400000
Translation initiation factor IF-3 OS=Escherichia coli (strain K12) OX=83333 GN=infC PE=1 SV=1	P0A707	infC	21 kDa	1716700000	2215500000	2209500000	2431600000	1741400000	1396700000	1272600000	1090900000	1520500000	1381700000	1521300000	1448900000	1399400000	1912200000	1690900000	1662000000	1838900000	2270200000	1865900000	1720200000	1732600000
2-dehydro-3-deoxyphosphooctonate aldolase OS=Escherichia coli (strain K12) OX=83333 GN=kdsA PE=1 SV=1	P0A715	kdsA	31 kDa	1525800000	1019200000	2066200000	697200000	542590000	713460000	515420000	421040000	507540000	775260000	526610000	823240000	506000000	943600000	547910000	1764700000	708890000	1449800000	1332500000	1323500000	1183500000
Ribose-phosphate pyrophosphokinase OS=Escherichia coli (strain K12) OX=83333 GN=prs PE=1 SV=2	P0A717	prs	34 kDa	711940000	994500000	661660000	878130000	732710000	533380000	662360000	637300000	766890000	593510000	486580000	584200000	488820000	732770000	609960000	718940000	785850000	960270000	749700000	606880000	618240000
Thymidylate kinase OS=Escherichia coli (strain K12) OX=83333 GN=tmk PE=1 SV=1	P0A720	tmk	24 kDa	5729800	13186000	10805000	12690000	18394000	14018000	2655700	2590700	5147000	16843000	11557000	13386000	2814800	13067000	2840000	13302000	13823000	25549000	16447000	14730000	17746000
Acyl-[acyl-carrier-protein]--UDP-N-acetylglucosamine O-acyltransferase OS=Escherichia coli (strain K12) OX=83333 GN=lpxA PE=1 SV=1	P0A722	lpxA	28 kDa	116670000	185540000	115800000	170150000	116790000	84147000	129130000	109220000	94186000	91263000	119660000	118280000	113450000	147130000	100880000	135260000	141560000	172570000	134800000	178110000	118080000
UDP-3-O-acyl-N-acetylglucosamine deacetylase OS=Escherichia coli (strain K12) OX=83333 GN=lpxC PE=1 SV=1	P0A725	lpxC	34 kDa	194040000	226290000	208680000	97077000	113170000	84267000	390420000	325830000	375180000	25431000	20489000	39258000	55121000	66328000	59700000	25712000	28569000	39723000	23517000	47091000	29378000
7-methyl-GTP pyrophosphatase OS=Escherichia coli (strain K12) OX=83333 GN=yceF PE=1 SV=1	P0A729	yceF	22 kDa	449900000	274730000	456620000	443300000	374790000	254920000	50682000	41972000	63409000	196680000	192970000	45899000	68867000	49588000	16855000	30585000	49531000	70130000	50115000	54368000	43267000
Methylglyoxal synthase OS=Escherichia coli (strain K12) OX=83333 GN=mgsA PE=1 SV=1	P0A731	mgsA	17 kDa	84327000	121660000	121580000	138150000	108360000	100530000	49395000	47862000	42487000	93044000	68048000	76162000	54941000	81607000	59093000	194770000	172680000	239410000	152210000	219910000	125830000
Cell division topological specificity factor OS=Escherichia coli (strain K12) OX=83333 GN=minE PE=1 SV=1	P0A734	minE	10 kDa	63853000	65793000	113540000	191270000	212310000	101450000	81850000	77706000	77630000	94480000	99481000	148120000	146670000	154560000	66626000	205370000	349320000	212490000	248660000	286780000	221730000
Cyclic pyranopterin monophosphate synthase OS=Escherichia coli (strain K12) OX=83333 GN=moaC PE=1 SV=2	P0A738	moaC	17 kDa	300320000	337030000	245330000	128170000	84730000	66235000	102480000	140560000	154670000	193770000	74452000	99753000	123130000	187140000	71812000	110900000	41635000	55385000	42637000	44294000	41830000
Large-conductance mechanosensitive channel OS=Escherichia coli (strain K12) OX=83333 GN=mscL PE=1 SV=1	P0A742	mscL	15 kDa	10635000	0	0	65514000	47348000	20789000	0	4843300	0	0	0	18909000	0	0	0	0	0	0	0	0	0
Peptide methionine sulfoxide reductase MsrA OS=Escherichia coli (strain K12) OX=83333 GN=msrA PE=1 SV=2	P0A744	msrA	23 kDa	258930000	249420000	162880000	244760000	169150000	118190000	144320000	128310000	127520000	116320000	59806000	74980000	94639000	146710000	95360000	119340000	132360000	112240000	90629000	95373000	116780000
Peptide methionine sulfoxide reductase MsrB OS=Escherichia coli (strain K12) OX=83333 GN=msrB PE=1 SV=1	P0A746	msrB	15 kDa	72993000	163270000	129310000	93185000	68373000	25426000	11718000	37547000	35397000	14526000	10008000	19542000	68336000	135300000	74934000	65670000	49560000	81693000	47525000	92939000	66715000
UDP-N-acetylglucosamine 1-carboxyvinyltransferase OS=Escherichia coli (strain K12) OX=83333 GN=murA PE=1 SV=1	P0A749	murA	45 kDa	274640000	304720000	232360000	356350000	237590000	182940000	235810000	251120000	290520000	262420000	197890000	195360000	188510000	238920000	174180000	197490000	220410000	325280000	252420000	229830000	223370000
Glucosamine-6-phosphate deaminase OS=Escherichia coli (strain K12) OX=83333 GN=nagB PE=1 SV=1	P0A759	nagB	30 kDa	961900000	1021900000	820870000	538910000	387370000	358790000	519390000	439410000	491040000	286170000	285520000	326570000	556700000	720070000	474190000	125820000	172460000	190940000	187780000	205170000	119840000
Putative N-acetylmannosamine-6-phosphate 2-epimerase OS=Escherichia coli (strain K12) OX=83333 GN=nanE PE=1 SV=1	P0A761	nanE	24 kDa	13041000	18731000	4942700	106520000	83418000	83731000	7656000	3048800	0	99394000	110790000	101630000	6999000	9603300	2825500	49897000	54374000	94097000	60322000	59715000	56698000
Nucleoside diphosphate kinase OS=Escherichia coli (strain K12) OX=83333 GN=ndk PE=1 SV=2	P0A763	ndk	15 kDa	1229500000	1012800000	1007300000	916260000	716140000	535320000	226370000	280530000	325540000	228850000	195610000	234950000	1243600000	2053700000	1519800000	2116900000	2339200000	2504800000	1691600000	1779700000	1624300000
RNA pyrophosphohydrolase OS=Escherichia coli (strain K12) OX=83333 GN=rppH PE=1 SV=1	P0A776	rppH	21 kDa	8581200	8706400	5998600	8115300	11583000	4709700	8594700	12770000	12971000	13545000	8411600	7192600	5292600	0	5873900	17403000	9695300	17340000	13443000	4374600	8667600
Transcription antitermination protein NusB OS=Escherichia coli (strain K12) OX=83333 GN=nusB PE=1 SV=1	P0A780	nusB	16 kDa	229970000	275170000	239890000	267260000	224680000	160220000	186580000	167770000	187250000	172060000	204620000	220310000	154600000	197240000	174510000	212400000	282860000	312560000	257630000	236640000	215000000
Oligoribonuclease OS=Escherichia coli (strain K12) OX=83333 GN=orn PE=1 SV=2	P0A784	orn	21 kDa	372530000	433910000	357820000	329150000	231150000	180340000	209770000	216870000	318780000	174590000	162490000	182260000	266220000	359140000	236090000	285750000	297560000	395580000	287980000	396060000	309530000
Aspartate carbamoyltransferase catalytic subunit OS=Escherichia coli (strain K12) OX=83333 GN=pyrB PE=1 SV=2	P0A786	pyrB	34 kDa	79213000	71387000	66390000	48285000	35250000	28739000	29854000	28066000	32040000	41715000	91017000	36475000	56453000	77687000	47459000	75997000	61772000	74315000	56997000	45534000	38866000
Pyridoxine 5'-phosphate synthase OS=Escherichia coli (strain K12) OX=83333 GN=pdxJ PE=1 SV=2	P0A794	pdxJ	26 kDa	242640000	247750000	244810000	263630000	230250000	173100000	277900000	259460000	261710000	241270000	205600000	241510000	193390000	225150000	173550000	283220000	322830000	409080000	311070000	304620000	298830000
ATP-dependent 6-phosphofructokinase isozyme 1 OS=Escherichia coli (strain K12) OX=83333 GN=pfkA PE=1 SV=1	P0A796	pfkA	35 kDa	1248700000	1335100000	1161500000	1077300000	881970000	793410000	820100000	737250000	747540000	720870000	569060000	585850000	496070000	702750000	423930000	555210000	508070000	634410000	612480000	508080000	503060000
Phosphoglycerate kinase OS=Escherichia coli (strain K12) OX=83333 GN=pgk PE=1 SV=2	P0A799	pgk	41 kDa	17154000000	17227000000	16912000000	11535000000	9634700000	6154100000	7182600000	6887400000	7706700000	6524800000	5767600000	5564200000	8729800000	13473000000	8296400000	9036100000	11996000000	12659000000	9884400000	9629400000	8019000000
Probable phosphoglycerate mutase GpmB OS=Escherichia coli (strain K12) OX=83333 GN=gpmB PE=3 SV=1	P0A7A2	gpmB	24 kDa	35875000	38907000	27124000	120090000	85901000	71000000	60605000	58869000	52347000	95192000	86069000	81104000	27720000	35527000	34508000	118590000	127460000	160980000	135450000	125430000	97186000
Protein-L-isoaspartate O-methyltransferase OS=Escherichia coli (strain K12) OX=83333 GN=pcm PE=1 SV=2	P0A7A5	pcm	23 kDa	6231800	6283100	5992400	18697000	5980400	24685000	3516300	2004000	4012300	5858800	4746500	7918600	2941700	4467900	3200500	7697400	5817800	17331000	0	0	0
Glycerol-3-phosphate acyltransferase OS=Escherichia coli (strain K12) OX=83333 GN=plsB PE=1 SV=2	P0A7A7	plsB	91 kDa	9031400	14217000	11424000	30419000	19409000	31062000	7881000	1393400	7894500	42938000	12169000	32965000	4339500	5735500	2801700	48728000	16494000	27086000	30535000	19619000	18987000
Inorganic pyrophosphatase OS=Escherichia coli (strain K12) OX=83333 GN=ppa PE=1 SV=2	P0A7A9	ppa	20 kDa	2454900000	2737100000	2289900000	2087300000	1722300000	1306400000	2346000000	2005200000	2339800000	1824600000	1862600000	1875300000	2705900000	3680000000	2690400000	3261600000	2716000000	3419300000	3280700000	3256300000	2412200000
Polyphosphate kinase OS=Escherichia coli (strain K12) OX=83333 GN=ppk PE=1 SV=2	P0A7B1	ppk	80 kDa	100580000	102580000	89484000	80024000	66912000	57309000	87298000	79530000	89932000	53490000	42940000	52791000	63081000	73901000	64840000	56345000	57701000	107840000	62596000	47338000	43306000
NAD kinase OS=Escherichia coli (strain K12) OX=83333 GN=nadK PE=1 SV=1	P0A7B3	nadK	33 kDa	3516100	0	20350000	29845000	33872000	18192000	9725100	0	0	14287000	10388000	23117000	0	0	0	11792000	0	20317000	0	0	10803000
Glutamate 5-kinase OS=Escherichia coli (strain K12) OX=83333 GN=proB PE=1 SV=1	P0A7B5	proB	39 kDa	68199000	75977000	68082000	126460000	100800000	85307000	0	0	0	0	0	0	21697000	28381000	22279000	56208000	67467000	61237000	83592000	53131000	42284000
ATP-dependent protease subunit HslV OS=Escherichia coli (strain K12) OX=83333 GN=hslV PE=1 SV=2	P0A7B8	hslV	19 kDa	229670000	246960000	232510000	280900000	217990000	158640000	192070000	159790000	162890000	151780000	172230000	157300000	220800000	263470000	197910000	322850000	336000000	439880000	229030000	212050000	209040000
LexA repressor OS=Escherichia coli (strain K12) OX=83333 GN=lexA PE=1 SV=1	P0A7C2	lexA	22 kDa	29714000	25767000	16241000	88960000	66336000	75806000	41131000	12598000	19090000	67801000	87580000	66957000	45052000	47763000	61397000	66814000	76954000	79476000	99451000	60534000	62535000
Peptidase E OS=Escherichia coli (strain K12) OX=83333 GN=pepE PE=1 SV=1	P0A7C6	pepE	25 kDa	44720000	45799000	24701000	186900000	169490000	147060000	26837000	40736000	27959000	181330000	173940000	152030000	86854000	120830000	91719000	202870000	182730000	209670000	147570000	172630000	169030000
Peptidyl-tRNA hydrolase OS=Escherichia coli (strain K12) OX=83333 GN=pth PE=1 SV=1	P0A7D1	pth	21 kDa	115910000	120710000	106740000	114160000	99860000	78514000	49404000	21408000	44522000	84650000	78154000	74619000	30535000	40736000	30019000	108070000	93120000	118620000	91138000	69671000	80372000
Adenylosuccinate synthetase OS=Escherichia coli (strain K12) OX=83333 GN=purA PE=1 SV=2	P0A7D4	purA	47 kDa	1631000000	2239100000	1931200000	2130900000	1662600000	1058900000	1524600000	1342900000	1770600000	1907500000	1408300000	1502200000	1431300000	2480700000	1722200000	1576200000	1983400000	2295300000	1834300000	1741000000	1711600000
Phosphoribosylaminoimidazole-succinocarboxamide synthase OS=Escherichia coli (strain K12) OX=83333 GN=purC PE=1 SV=1	P0A7D7	purC	27 kDa	54748000	84409000	70247000	153940000	94494000	74228000	17697000	5301400	6582700	75507000	72487000	96345000	21435000	23834000	24851000	56251000	57608000	92408000	82657000	60499000	405840000
Dihydroorotate dehydrogenase (quinone) OS=Escherichia coli (strain K12) OX=83333 GN=pyrD PE=1 SV=1	P0A7E1	pyrD	37 kDa	0	0	0	32305000	0	4309200	0	0	0	0	6154300	0	0	0	0	0	0	0	0	0	0
Orotate phosphoribosyltransferase OS=Escherichia coli (strain K12) OX=83333 GN=pyrE PE=1 SV=2	P0A7E3	pyrE	24 kDa	0	0	0	0	3945500	0	0	0	0	0	0	0	4661800	0	0	0	0	0	0	0	0
CTP synthase OS=Escherichia coli (strain K12) OX=83333 GN=pyrG PE=1 SV=2	P0A7E5	pyrG	60 kDa	1647300000	2259000000	1492400000	1979900000	1088600000	683820000	963930000	908460000	986390000	1009400000	721850000	876210000	1041100000	1011000000	661600000	1036200000	1217100000	1334300000	595340000	648350000	839310000
Uridylate kinase OS=Escherichia coli (strain K12) OX=83333 GN=pyrH PE=1 SV=2	P0A7E9	pyrH	26 kDa	476420000	567460000	520380000	413890000	278040000	280550000	274780000	227090000	294140000	280170000	210690000	255960000	287140000	247490000	173930000	456480000	401420000	529300000	375420000	569280000	426940000
Aspartate carbamoyltransferase regulatory chain OS=Escherichia coli (strain K12) OX=83333 GN=pyrI PE=1 SV=2	P0A7F3	pyrI	17 kDa	29807000	24532000	29925000	23650000	8671400	13857000	5542900	13274000	13180000	41387000	11643000	14990000	85746000	121420000	46497000	30196000	33740000	36582000	62761000	24018000	8459000
S-adenosylmethionine decarboxylase proenzyme OS=Escherichia coli (strain K12) OX=83333 GN=speD PE=1 SV=1	P0A7F6	speD	30 kDa	68058000	73250000	59137000	145510000	129340000	88658000	65584000	38748000	50081000	101670000	90209000	92115000	84318000	98230000	83740000	80624000	86547000	135350000	152370000	135660000	84716000
S-adenosylmethionine:tRNA ribosyltransferase-isomerase OS=Escherichia coli (strain K12) OX=83333 GN=queA PE=1 SV=1	P0A7F9	queA	39 kDa	2480500000	26821000	16267000	0	26423000	0	1783600000	0	0	889030000	0	741830000	0	0	0	16946000	381920000	0	16742000	409350000	385570000
30S ribosome-binding factor OS=Escherichia coli (strain K12) OX=83333 GN=rbfA PE=1 SV=2	P0A7G2	rbfA	15 kDa	328840000	418890000	344070000	539060000	320080000	280630000	88091000	335030000	381370000	426700000	231040000	412060000	161440000	309400000	246970000	378380000	391520000	289400000	300670000	364450000	264340000
Protein RecA OS=Escherichia coli (strain K12) OX=83333 GN=recA PE=1 SV=2	P0A7G6	recA	38 kDa	518500000	575850000	393710000	862240000	738700000	683980000	72833000	52124000	53531000	273220000	255480000	348620000	92938000	118830000	102020000	224330000	295060000	323040000	279010000	205850000	224640000
Recombination protein RecR OS=Escherichia coli (strain K12) OX=83333 GN=recR PE=1 SV=1	P0A7H6	recR	22 kDa	0	2986400	0	10692000	0	8269900	0	0	1018300	0	0	4104000	0	0	0	0	0	19886000	2585000	0	5052700
Peptide chain release factor RF1 OS=Escherichia coli (strain K12) OX=83333 GN=prfA PE=1 SV=1	P0A7I0	prfA	41 kDa	47823000	55688000	55337000	63968000	52539000	42152000	28834000	24993000	29801000	56076000	52360000	56010000	30826000	35432000	30490000	123710000	67339000	93433000	81449000	68402000	110950000
Peptide chain release factor RF3 OS=Escherichia coli (strain K12) OX=83333 GN=prfC PE=1 SV=2	P0A7I4	prfC	60 kDa	186170000	269140000	135700000	344860000	262900000	159660000	71275000	64266000	78590000	257720000	211730000	209110000	89366000	177410000	101340000	242250000	282940000	410870000	229610000	234920000	228500000
GTP cyclohydrolase-2 OS=Escherichia coli (strain K12) OX=83333 GN=ribA PE=1 SV=1	P0A7I7	ribA	22 kDa	146180000	171990000	145710000	169120000	106750000	105600000	153700000	123040000	147920000	100760000	95021000	89507000	107790000	121620000	116940000	121570000	120310000	172030000	61101000	71936000	46838000
3,4-dihydroxy-2-butanone 4-phosphate synthase OS=Escherichia coli (strain K12) OX=83333 GN=ribB PE=1 SV=1	P0A7J0	ribB	23 kDa	189050000	161370000	200900000	256080000	196320000	88495000	233180000	257110000	294720000	144710000	94240000	164460000	226310000	226160000	129110000	119170000	147750000	303940000	91207000	100320000	168440000
Large ribosomal subunit protein uL10 OS=Escherichia coli (strain K12) OX=83333 GN=rplJ PE=1 SV=2	P0A7J3	rplJ	18 kDa	5590900000	6488500000	5515300000	9061200000	6950500000	5376300000	4366300000	3916700000	4490200000	4676700000	4903700000	5889600000	4546900000	4303900000	4733600000	6147100000	6442300000	7459100000	6735500000	6668600000	6320400000
Large ribosomal subunit protein uL11 OS=Escherichia coli (strain K12) OX=83333 GN=rplK PE=1 SV=2	P0A7J7	rplK	15 kDa	7848400000	9096600000	7189000000	10596000000	7393600000	5806000000	7767000000	6318400000	5477400000	5818400000	7071700000	6572500000	6360900000	9435600000	6402000000	7020000000	7659000000	7900900000	6733200000	6409200000	6137200000
Large ribosomal subunit protein bL12 OS=Escherichia coli (strain K12) OX=83333 GN=rplL PE=1 SV=2	P0A7K2	rplL	12 kDa	25114000000	27111000000	27280000000	26539000000	7875300000	19753000000	19971000000	10721000000	14015000000	21291000000	15245000000	13190000000	26227000000	26693000000	27345000000	15618000000	28817000000	9354300000	21340000000	17494000000	24753000000
Large ribosomal subunit protein bL19 OS=Escherichia coli (strain K12) OX=83333 GN=rplS PE=1 SV=2	P0A7K6	rplS	13 kDa	6255000000	6774400000	5876000000	5448600000	6096400000	5859200000	6777400000	5919900000	4696600000	3841300000	5306200000	3841600000	6527100000	8980600000	7876300000	6190300000	6907300000	7015900000	4943100000	6111400000	5882300000
Large ribosomal subunit protein uL1 OS=Escherichia coli (strain K12) OX=83333 GN=rplA PE=1 SV=2	P0A7L0	rplA	25 kDa	11639000000	8938600000	11710000000	14560000000	10685000000	10714000000	10317000000	11110000000	12090000000	10331000000	8101600000	10823000000	10670000000	16060000000	12753000000	11484000000	7690800000	17448000000	11516000000	12172000000	9476300000
Large ribosomal subunit protein bL20 OS=Escherichia coli (strain K12) OX=83333 GN=rplT PE=1 SV=2	P0A7L3	rplT	13 kDa	5554100000	6997200000	5875100000	8429900000	5956700000	4689400000	5867900000	5583200000	6443200000	6092200000	4773900000	5552500000	5865200000	7077500000	6052600000	5864200000	5903000000	6749900000	5387600000	5223100000	4733700000
Large ribosomal subunit protein bL27 OS=Escherichia coli (strain K12) OX=83333 GN=rpmA PE=1 SV=2	P0A7L8	rpmA	9 kDa	906300000	817270000	827720000	1327300000	1026400000	679700000	1587000000	1493400000	1624100000	998490000	740720000	1016600000	678410000	1106600000	621750000	1037400000	726130000	850530000	627880000	821210000	954270000
Large ribosomal subunit protein bL28 OS=Escherichia coli (strain K12) OX=83333 GN=rpmB PE=1 SV=2	P0A7M2	rpmB	9 kDa	4487100000	6463700000	4580700000	7174800000	4591600000	3961900000	4725300000	2227200000	5494400000	5337800000	4213200000	4555900000	4499300000	5735800000	4523700000	4024900000	4517800000	5364600000	3989500000	4110200000	3541500000
Large ribosomal subunit protein uL29 OS=Escherichia coli (strain K12) OX=83333 GN=rpmC PE=1 SV=1	P0A7M6	rpmC	7 kDa	2331100000	2728300000	2405600000	3478100000	2838000000	5217200000	3056600000	3867100000	4138000000	404150000	2006500000	2249800000	3382300000	4637600000	2979500000	2979000000	2695500000	8126200000	3281400000	7197700000	4366400000
Large ribosomal subunit protein bL31 OS=Escherichia coli (strain K12) OX=83333 GN=rpmE PE=1 SV=1	P0A7M9	rpmE	8 kDa	1044200000	1281000000	996090000	1392600000	783220000	807660000	1365400000	1096800000	1348100000	835380000	1022200000	1197600000	1320600000	1985800000	1350900000	928310000	748690000	1231400000	1060100000	1129400000	1091700000
Large ribosomal subunit protein bL32 OS=Escherichia coli (strain K12) OX=83333 GN=rpmF PE=1 SV=2	P0A7N4	rpmF	6 kDa	338180000	1169800000	1037800000	1360500000	1278800000	1104200000	435340000	391250000	382060000	952800000	994540000	988620000	439980000	526330000	516280000	1482400000	1340200000	1867300000	1323400000	1290300000	1351900000
Large ribosomal subunit protein bL33 OS=Escherichia coli (strain K12) OX=83333 GN=rpmG PE=1 SV=2	P0A7N9	rpmG	6 kDa	4054000000	4015600000	3664600000	5132200000	3889600000	3521500000	3484200000	3184100000	3709400000	692200000	3154500000	3524700000	752140000	4877100000	3187300000	3986000000	3836400000	752970000	3999700000	4112700000	4307200000
Large ribosomal subunit protein bL34 OS=Escherichia coli (strain K12) OX=83333 GN=rpmH PE=1 SV=1	P0A7P5	rpmH	5 kDa	1828800000	1703000000	1702800000	3008100000	1861000000	1871000000	1657400000	1353400000	1668100000	2120900000	1659700000	1930100000	1192600000	1765200000	1590000000	2082800000	2350400000	3163900000	2405900000	1784500000	1952700000
Large ribosomal subunit protein bL35 OS=Escherichia coli (strain K12) OX=83333 GN=rpmI PE=1 SV=2	P0A7Q1	rpmI	7 kDa	0	259290000	97499000	0	0	190360000	79483000	135510000	168560000	24222000	0	442750000	0	158640000	108410000	160280000	0	140280000	0	0	181640000
Large ribosomal subunit protein bL9 OS=Escherichia coli (strain K12) OX=83333 GN=rplI PE=1 SV=1	P0A7R1	rplI	16 kDa	6871900000	8421100000	7110700000	10683000000	7211300000	6029200000	8547000000	7506800000	8841700000	6658100000	6171900000	6315400000	8156300000	9356000000	9835400000	7257800000	7693800000	9109700000	7858000000	7059200000	6910400000
Small ribosomal subunit protein uS10 OS=Escherichia coli (strain K12) OX=83333 GN=rpsJ PE=1 SV=1	P0A7R5	rpsJ	12 kDa	5091500000	5524600000	5494400000	8071700000	7079100000	5955700000	5301100000	3773400000	4961900000	4537200000	5337100000	5199000000	6131700000	7444500000	6056300000	6447800000	7247200000	7493300000	6716600000	6996600000	6667200000
Small ribosomal subunit protein uS11 OS=Escherichia coli (strain K12) OX=83333 GN=rpsK PE=1 SV=2	P0A7R9	rpsK	14 kDa	3735800000	4525400000	4022400000	5681700000	4141400000	2930100000	4689200000	4014900000	4647100000	4493500000	3827800000	4071400000	3886300000	5241200000	3587800000	3322500000	3633900000	4312000000	3493800000	3409200000	3035800000
Small ribosomal subunit protein uS12 OS=Escherichia coli (strain K12) OX=83333 GN=rpsL PE=1 SV=2	P0A7S3	rpsL	14 kDa	2225200000	2916200000	2332500000	2812800000	2127900000	2205300000	3056200000	2701800000	3338400000	2070900000	1883700000	2172800000	2318100000	2847200000	2438600000	2039200000	2001900000	2111200000	2017200000	2203600000	2157500000
Small ribosomal subunit protein uS13 OS=Escherichia coli (strain K12) OX=83333 GN=rpsM PE=1 SV=2	P0A7S9	rpsM	13 kDa	6554400000	8979300000	6804400000	9572500000	6965600000	6051200000	7253800000	7449700000	9357200000	6337300000	5931400000	6947100000	8822600000	11153000000	8577500000	7397900000	8923600000	9579500000	7712000000	7425700000	7478700000
Small ribosomal subunit protein bS16 OS=Escherichia coli (strain K12) OX=83333 GN=rpsP PE=1 SV=1	P0A7T3	rpsP	9 kDa	6133000000	6629000000	6585600000	6415300000	7047500000	5703500000	6634300000	6098300000	7161900000	5336600000	5507900000	5442000000	7521700000	9539700000	7225600000	6322700000	6646300000	9433000000	6827000000	6009200000	6758000000
Small ribosomal subunit protein bS18 OS=Escherichia coli (strain K12) OX=83333 GN=rpsR PE=1 SV=2	P0A7T7	rpsR	9 kDa	3654300000	3845600000	2865600000	4560500000	3581300000	3264500000	3496900000	3872700000	4357400000	3187300000	3223600000	3235200000	3660600000	4133200000	3808700000	2513900000	3645800000	3957500000	3365800000	3685500000	3081500000
Small ribosomal subunit protein uS19 OS=Escherichia coli (strain K12) OX=83333 GN=rpsS PE=1 SV=2	P0A7U3	rpsS	10 kDa	3928700000	4227300000	3892800000	5740900000	4234800000	3446600000	4485500000	3999200000	4180700000	3865100000	3388200000	4017900000	4156100000	5086500000	4720600000	4043500000	4402500000	5722500000	4583000000	4274400000	4291800000
Small ribosomal subunit protein bS20 OS=Escherichia coli (strain K12) OX=83333 GN=rpsT PE=1 SV=2	P0A7U7	rpsT	10 kDa	5102100000	5431200000	4969500000	7590700000	3264500000	4639400000	5610000000	5227500000	6561700000	3703300000	3902300000	2622800000	3452600000	4269200000	3672600000	4109500000	3861000000	4486600000	3655700000	2603100000	3800700000
Small ribosomal subunit protein uS2 OS=Escherichia coli (strain K12) OX=83333 GN=rpsB PE=1 SV=2	P0A7V0	rpsB	27 kDa	7699600000	6989200000	8183400000	11687000000	8102800000	7688500000	7338500000	6924500000	6924200000	8475300000	7647500000	8563000000	8270900000	11258000000	10320000000	7631200000	7247500000	10826000000	8932800000	9506600000	8856500000
Small ribosomal subunit protein uS3 OS=Escherichia coli (strain K12) OX=83333 GN=rpsC PE=1 SV=2	P0A7V3	rpsC	26 kDa	8288100000	9331300000	8069100000	11694000000	8794300000	8194200000	7344500000	7224400000	9199500000	7684900000	7774400000	7022600000	7271700000	9779000000	9179000000	8773800000	10050000000	11448000000	9522300000	9739700000	8496200000
Small ribosomal subunit protein uS4 OS=Escherichia coli (strain K12) OX=83333 GN=rpsD PE=1 SV=2	P0A7V8	rpsD	23 kDa	12215000000	14928000000	10581000000	16951000000	12752000000	12096000000	14975000000	10854000000	14928000000	10765000000	10215000000	10152000000	9794700000	20291000000	9661000000	11720000000	13120000000	17886000000	11150000000	13531000000	12524000000
Small ribosomal subunit protein uS5 OS=Escherichia coli (strain K12) OX=83333 GN=rpsE PE=1 SV=2	P0A7W1	rpsE	18 kDa	8000300000	9169100000	7963300000	10477000000	7821500000	6590500000	7237000000	7308300000	8792900000	6424400000	6309000000	7150200000	7957800000	10586000000	9356700000	8241100000	8439000000	10791000000	6829700000	7397500000	7382100000
Small ribosomal subunit protein uS8 OS=Escherichia coli (strain K12) OX=83333 GN=rpsH PE=1 SV=2	P0A7W7	rpsH	14 kDa	4642200000	5389900000	4460700000	5861900000	4389100000	4602500000	6563700000	5226500000	6990600000	4906700000	5065400000	4260100000	6420700000	7125900000	6410700000	4881500000	4830700000	5344200000	5380600000	4760400000	4957400000
Small ribosomal subunit protein uS9 OS=Escherichia coli (strain K12) OX=83333 GN=rpsI PE=1 SV=2	P0A7X3	rpsI	15 kDa	7763800000	8748800000	7131200000	12175000000	7346500000	6720800000	8880700000	5352800000	8701700000	8073300000	8243900000	8372700000	7543700000	11118000000	8034800000	9767100000	9388100000	11825000000	8374000000	10051000000	8630000000
Ribosome maturation factor RimM OS=Escherichia coli (strain K12) OX=83333 GN=rimM PE=1 SV=1	P0A7X6	rimM	21 kDa	111820000	129490000	120530000	120400000	120210000	53152000	94751000	84920000	92965000	102060000	83552000	72174000	96924000	94778000	58140000	83888000	12560000	32976000	121940000	184700000	149940000
Ribonuclease 3 OS=Escherichia coli (strain K12) OX=83333 GN=rnc PE=1 SV=1	P0A7Y0	rnc	26 kDa	123330000	154020000	101990000	181970000	875880000	95938000	52547000	35611000	921970000	981990000	82690000	969340000	29301000	28938000	23980000	73191000	896220000	100360000	871660000	931640000	49858000
Ribonuclease HI OS=Escherichia coli (strain K12) OX=83333 GN=rnhA PE=1 SV=1	P0A7Y4	rnhA	18 kDa	35445000	25415000	22085000	37286000	31914000	20777000	12208000	18003000	14469000	30387000	26777000	24742000	6403600	21047000	13344000	33188000	20054000	20282000	19298000	26705000	18045000
Ribonuclease P protein component OS=Escherichia coli (strain K12) OX=83333 GN=rnpA PE=1 SV=1	P0A7Y8	rnpA	14 kDa	57354000	106100000	85332000	172710000	115800000	0	26139000	20685000	43405000	77306000	78788000	0	22077000	31566000	24462000	61865000	81215000	87763000	63624000	64662000	53893000
Ribose-5-phosphate isomerase A OS=Escherichia coli (strain K12) OX=83333 GN=rpiA PE=1 SV=1	P0A7Z0	rpiA	23 kDa	929220000	858210000	936580000	498220000	411500000	347460000	560670000	490230000	594010000	379290000	392390000	431330000	637180000	873900000	599040000	595810000	646150000	756430000	533120000	687150000	640700000
DNA-directed RNA polymerase subunit alpha OS=Escherichia coli (strain K12) OX=83333 GN=rpoA PE=1 SV=1	P0A7Z4	rpoA	37 kDa	5488000000	6417600000	6230200000	5078800000	3843100000	3753800000	4498400000	3547300000	4989900000	3368000000	2806100000	3193000000	4718000000	4669300000	3606400000	3910400000	4693200000	4249300000	3996500000	3637500000	3690100000
DNA-directed RNA polymerase subunit omega OS=Escherichia coli (strain K12) OX=83333 GN=rpoZ PE=1 SV=1	P0A800	rpoZ	10 kDa	439880000	633720000	519250000	896590000	588870000	357780000	152650000	206090000	203290000	258260000	229000000	262290000	269530000	268690000	235130000	199190000	204980000	289210000	298440000	219310000	244940000
Ribosome-recycling factor OS=Escherichia coli (strain K12) OX=83333 GN=frr PE=1 SV=1	P0A805	frr	21 kDa	1293000000	1964000000	1429000000	1710400000	1039400000	1213600000	887660000	1042700000	947260000	1169700000	910160000	1195000000	921760000	1795000000	1183900000	1118400000	2367300000	1246700000	1915600000	1737700000	1508000000
Holliday junction branch migration complex subunit RuvA OS=Escherichia coli (strain K12) OX=83333 GN=ruvA PE=1 SV=1	P0A809	ruvA	22 kDa	28081000	30448000	25018000	68657000	51360000	63445000	6153900	2558800	5497800	13855000	13794000	21504000	0	6455100	4665900	8618100	10648000	17505000	11461000	8550200	11048000
Holliday junction branch migration complex subunit RuvB OS=Escherichia coli (strain K12) OX=83333 GN=ruvB PE=1 SV=1	P0A812	ruvB	37 kDa	2701400	12784000	13018000	28700000	32772000	17370000	0	0	0	0	0	0	0	0	0	0	13087000	9740500	12174000	0	0
S-adenosylmethionine synthase OS=Escherichia coli (strain K12) OX=83333 GN=metK PE=1 SV=2	P0A817	metK	42 kDa	2052900000	1814600000	2454400000	1781400000	1658100000	1002400000	991000000	1463400000	1494300000	1403700000	1075700000	1377300000	1030300000	1436700000	847210000	835510000	767850000	1075600000	765980000	748040000	546320000
L-seryl-tRNA(Sec) selenium transferase OS=Escherichia coli (strain K12) OX=83333 GN=selA PE=1 SV=1	P0A821	selA	51 kDa	74937000	84527000	81507000	69881000	56169000	47568000	69286000	61540000	57217000	56147000	37037000	57952000	55287000	59941000	49148000	806630000	68445000	572410000	58751000	60865000	46330000
Sugar fermentation stimulation protein A OS=Escherichia coli (strain K12) OX=83333 GN=sfsA PE=1 SV=1	P0A823	sfsA	26 kDa	14716000	6200000	12586000	6907400	4991100	3104700	15946000	18974000	15128000	5135100	5402400	6222500	12201000	17947000	8936700	15781000	19425000	37609000	9621700	25209000	16102000
Serine hydroxymethyltransferase OS=Escherichia coli (strain K12) OX=83333 GN=glyA PE=1 SV=1	P0A825	glyA	45 kDa	3234700000	3648900000	3650200000	2469500000	1575500000	1408900000	2072100000	1544500000	1649900000	2050100000	1580600000	2087300000	2485700000	3616300000	2274600000	3739800000	3719500000	4484700000	3304300000	3500700000	3144700000
Aerobic C4-dicarboxylate transport protein OS=Escherichia coli (strain K12) OX=83333 GN=dctA PE=1 SV=1	P0A830	dctA	45 kDa	0	0	0	0	0	0	0	0	0	0	0	0	4082300	11610000	7478600	26707000	29025000	43548000	85045000	36012000	22435000
SsrA-binding protein OS=Escherichia coli (strain K12) OX=83333 GN=smpB PE=1 SV=2	P0A832	smpB	18 kDa	189620000	216620000	243360000	217070000	150120000	160030000	159540000	159740000	189520000	173460000	144980000	81041000	174720000	229760000	170650000	168130000	82063000	203920000	90327000	142830000	145670000
Succinate--CoA ligase [ADP-forming] subunit beta OS=Escherichia coli (strain K12) OX=83333 GN=sucC PE=1 SV=1	P0A836	sucC	41 kDa	4914700000	5598200000	6769200000	3866400000	2356700000	1628100000	717940000	766440000	704090000	768680000	570920000	451480000	7405700000	10033000000	8435700000	9176900000	9052100000	8549100000	5295800000	7223600000	5266400000
5'/3'-nucleotidase SurE OS=Escherichia coli (strain K12) OX=83333 GN=surE PE=1 SV=1	P0A840	surE	27 kDa	0	0	2599100	0	2514600	0	1894800	2187500	0	7401500	0	4457700	0	0	0	0	3562000	5409800	3074500	3642400	0
Queuine tRNA-ribosyltransferase OS=Escherichia coli (strain K12) OX=83333 GN=tgt PE=1 SV=1	P0A847	tgt	43 kDa	93283000	104460000	81929000	120780000	88436000	69842000	123560000	111040000	117300000	75010000	73558000	93903000	100520000	121000000	113660000	104550000	90366000	124830000	97995000	107460000	73762000
Trigger factor OS=Escherichia coli (strain K12) OX=83333 GN=tig PE=1 SV=1	P0A850	tig	48 kDa	3334000000	3796500000	3521800000	7365300000	5276600000	4433500000	3196200000	2486100000	3228100000	4799900000	4093200000	3780600000	3262000000	4589700000	3469500000	5045400000	5358400000	5957800000	4931700000	5528200000	4967700000
Tryptophanase OS=Escherichia coli (strain K12) OX=83333 GN=tnaA PE=1 SV=1	P0A853	tnaA	53 kDa	4158500000	6232900000	2143800000	57672000000	47881000000	38731000000	6711600000	7862200000	8625100000	67678000000	70429000000	74257000000	42580000000	57519000000	43118000000	135990000000	138410000000	146630000000	119550000000	124780000000	99542000000
Tol-Pal system protein TolB OS=Escherichia coli (strain K12) OX=83333 GN=tolB PE=1 SV=1	P0A855	tolB	46 kDa	433660000	451270000	446370000	185820000	184530000	157000000	341820000	278110000	272180000	170260000	148180000	100160000	330750000	478280000	387390000	177840000	179380000	354750000	163440000	162600000	223320000
Triosephosphate isomerase OS=Escherichia coli (strain K12) OX=83333 GN=tpiA PE=1 SV=1	P0A858	tpiA	27 kDa	3086200000	4140500000	3021900000	1733700000	1730100000	1443300000	837140000	876970000	859880000	1281100000	899130000	1110400000	1040300000	1175800000	768820000	1342800000	1390100000	1660500000	1248800000	1315800000	995730000
Thiol peroxidase OS=Escherichia coli (strain K12) OX=83333 GN=tpx PE=1 SV=2	P0A862	tpx	18 kDa	5278700000	6530300000	6235100000	3049000000	2448200000	1896300000	2250000000	2221800000	2242000000	1661800000	1192100000	1480400000	6460100000	8303500000	5342200000	5043700000	5211600000	6216600000	4229400000	5078200000	4668700000
Transaldolase A OS=Escherichia coli (strain K12) OX=83333 GN=talA PE=3 SV=1	P0A867	talA	36 kDa	1807700000	2013000000	1903500000	1216500000	793290000	704010000	487030000	459100000	451360000	387770000	271420000	332010000	54549000	61578000	43848000	53657000	24230000	36590000	87601000	33720000	35753000
Transaldolase B OS=Escherichia coli (strain K12) OX=83333 GN=talB PE=1 SV=2	P0A870	talB	35 kDa	5869400000	6677600000	5987200000	4578100000	4549300000	3755400000	6318600000	6287300000	7840600000	4315200000	4134400000	3412400000	8324700000	12179000000	7911400000	7184900000	9071500000	7633400000	5998900000	8628000000	5751600000
tRNA (guanine-N(1)-)-methyltransferase OS=Escherichia coli (strain K12) OX=83333 GN=trmD PE=1 SV=1	P0A873	trmD	28 kDa	27017000	20843000	0	38722000	15321000	15682000	39211000	13716000	40974000	36737000	67378000	19027000	14696000	57364000	32497000	17251000	28206000	29801000	16322000	33581000	48274000
Tryptophan synthase alpha chain OS=Escherichia coli (strain K12) OX=83333 GN=trpA PE=1 SV=1	P0A877	trpA	29 kDa	118000000	107700000	94919000	327240000	39329000	30070000	47041000	34420000	42319000	45039000	31623000	228910000	75717000	126080000	739460000	69049000	75560000	120770000	782140000	108050000	171100000
Tryptophan synthase beta chain OS=Escherichia coli (strain K12) OX=83333 GN=trpB PE=1 SV=2	P0A879	trpB	43 kDa	98707000	80669000	94639000	19680000	60579000	36466000	37989000	36050000	52425000	27816000	25387000	11544000	42369000	94041000	35672000	105380000	93865000	171630000	92659000	93463000	106520000
Trp operon repressor OS=Escherichia coli (strain K12) OX=83333 GN=trpR PE=1 SV=2	P0A881	trpR	12 kDa	0	0	0	0	0	0	0	0	7036000	0	9617700	0	7774600	10461000	5200100	14988000	12414000	0	43847000	10655000	1591500
Thymidylate synthase OS=Escherichia coli (strain K12) OX=83333 GN=thyA PE=1 SV=1	P0A884	thyA	30 kDa	136750000	166560000	134710000	208640000	202640000	105770000	174430000	157990000	191760000	237250000	195370000	186910000	88560000	138700000	85255000	181290000	182060000	212040000	190400000	235040000	159520000
Ubiquinone/menaquinone biosynthesis C-methyltransferase UbiE OS=Escherichia coli (strain K12) OX=83333 GN=ubiE PE=1 SV=1	P0A887	ubiE	28 kDa	192030000	220290000	205740000	116790000	115570000	112440000	112120000	106580000	98404000	94567000	119020000	136530000	115990000	160850000	103070000	218860000	231370000	315660000	237380000	213300000	201670000
Sulfur carrier protein TusA OS=Escherichia coli (strain K12) OX=83333 GN=tusA PE=1 SV=1	P0A890	tusA	9 kDa	11715000	0	17535000	38998000	0	0	25738000	0	0	29268000	0	40203000	0	15179000	0	0	0	24041000	29997000	25596000	0
RNase adapter protein RapZ OS=Escherichia coli (strain K12) OX=83333 GN=rapZ PE=1 SV=1	P0A894	rapZ	32 kDa	136540000	132980000	128230000	59292000	63819000	59302000	119750000	42919000	38845000	71117000	28453000	47441000	56181000	89318000	67750000	102590000	90684000	69129000	54288000	45383000	68267000
Probable transcriptional regulatory protein YebC OS=Escherichia coli (strain K12) OX=83333 GN=yebC PE=1 SV=1	P0A8A0	yebC	26 kDa	691330000	852460000	688550000	618650000	617960000	532120000	668980000	723490000	765660000	684060000	542510000	549130000	438940000	617110000	568480000	631910000	573070000	616070000	616030000	617790000	552620000
Probable transcriptional regulatory protein YeeN OS=Escherichia coli (strain K12) OX=83333 GN=yeeN PE=1 SV=1	P0A8A2	yeeN	26 kDa	391570000	506580000	499590000	650820000	394850000	324450000	219400000	268170000	309030000	469600000	409090000	401730000	225550000	439260000	273100000	361780000	345200000	620020000	518630000	484740000	487630000
Phosphoenolpyruvate synthase regulatory protein OS=Escherichia coli (strain K12) OX=83333 GN=ppsR PE=1 SV=1	P0A8A4	ppsR	31 kDa	25979000	37333000	27755000	31391000	23825000	22689000	8559400	2414600	0	27598000	16247000	30582000	3076200	0	4146700	17875000	12605000	26668000	17759000	4889900	19996000
Ribosome maturation factor RimP OS=Escherichia coli (strain K12) OX=83333 GN=rimP PE=1 SV=2	P0A8A8	rimP	17 kDa	118520000	125590000	148670000	202450000	141210000	88853000	141980000	124100000	143650000	94425000	114860000	106380000	106440000	154740000	127780000	122260000	109530000	126300000	101180000	101480000	91954000
Nucleoid-associated protein YbaB OS=Escherichia coli (strain K12) OX=83333 GN=ybaB PE=1 SV=1	P0A8B5	ybaB	12 kDa	153460000	181780000	46904000	299640000	83486000	66486000	226050000	62251000	71211000	61530000	136370000	252600000	139320000	166790000	68968000	206650000	74843000	252040000	228100000	226720000	109850000
UPF0145 protein YbjQ OS=Escherichia coli (strain K12) OX=83333 GN=ybjQ PE=1 SV=1	P0A8C1	ybjQ	11 kDa	42460000	54437000	39563000	80764000	57963000	45162000	21502000	22416000	26065000	37346000	28851000	49333000	20434000	28551000	20860000	20425000	22860000	32006000	23264000	13886000	24779000
UPF0149 protein YgfB OS=Escherichia coli (strain K12) OX=83333 GN=ygfB PE=3 SV=1	P0A8C4	ygfB	21 kDa	161450000	188330000	125450000	124030000	94039000	77106000	102450000	99603000	126750000	81741000	87224000	78185000	91993000	162560000	124470000	121180000	151220000	157070000	129400000	96649000	107880000
Transcriptional repressor NrdR OS=Escherichia coli (strain K12) OX=83333 GN=nrdR PE=1 SV=1	P0A8D0	nrdR	17 kDa	68740000	93088000	100300000	67681000	45748000	41502000	69075000	62445000	56700000	60127000	38415000	53718000	60527000	86505000	56422000	72292000	74213000	97897000	69699000	64253000	60981000
UPF0178 protein YaiI OS=Escherichia coli (strain K12) OX=83333 GN=yaiI PE=1 SV=1	P0A8D3	yaiI	17 kDa	4944800	3138900	6652700	0	0	0	0	0	2532000	0	3050900	5092300	0	0	2273700	14229000	0	10746000	12803000	3259700	2994500
O-acetyl-ADP-ribose deacetylase OS=Escherichia coli (strain K12) OX=83333 GN=ymdB PE=1 SV=1	P0A8D6	ymdB	19 kDa	53472000	8211100	14678000	90278000	44714000	23772000	5295800	0	38245000	99102000	11430000	17406000	0	0	0	4851600	0	0	8766400	0	0
UPF0227 protein YcfP OS=Escherichia coli (strain K12) OX=83333 GN=ycfP PE=1 SV=1	P0A8E1	ycfP	21 kDa	212590000	220100000	269790000	382770000	328230000	216690000	64942000	196670000	280170000	201510000	153770000	224060000	6963900	205320000	10853000	150530000	174660000	154470000	181430000	191790000	141920000
UPF0231 protein YacL OS=Escherichia coli (strain K12) OX=83333 GN=yacL PE=1 SV=1	P0A8E5	yacL	14 kDa	31482000	36196000	94091000	63519000	38812000	34364000	23616000	124330000	22926000	62682000	56972000	64125000	63419000	42153000	33904000	99792000	0	0	0	0	0
UPF0234 protein YajQ OS=Escherichia coli (strain K12) OX=83333 GN=yajQ PE=1 SV=2	P0A8E7	yajQ	18 kDa	1380800000	1494600000	1486900000	1807900000	1118300000	992720000	1201900000	1221800000	1394900000	958100000	1083300000	964190000	1145600000	1525700000	1257300000	1198900000	1460300000	1668300000	1215000000	1351800000	1213600000
Uracil phosphoribosyltransferase OS=Escherichia coli (strain K12) OX=83333 GN=upp PE=1 SV=1	P0A8F0	upp	23 kDa	660260000	946980000	559000000	1547800000	1165400000	701860000	310000000	245280000	296920000	1021100000	799040000	739320000	324880000	633370000	397310000	611310000	746480000	704650000	521820000	507510000	499200000
Uridine kinase OS=Escherichia coli (strain K12) OX=83333 GN=udk PE=3 SV=1	P0A8F4	udk	24 kDa	107670000	124010000	106050000	131950000	111090000	82322000	134330000	123510000	161490000	141040000	116350000	113950000	75881000	225370000	86199000	95143000	93598000	164730000	130660000	143240000	115140000
UvrABC system protein B OS=Escherichia coli (strain K12) OX=83333 GN=uvrB PE=1 SV=2	P0A8F8	uvrB	76 kDa	60833000	74129000	65752000	101410000	75189000	61292000	2062200	9089300	0	26389000	34514000	34523000	3501000	18437000	2075800	13083000	16741000	19827000	24653000	8925700	18490000
UvrABC system protein C OS=Escherichia coli (strain K12) OX=83333 GN=uvrC PE=1 SV=1	P0A8G0	uvrC	68 kDa	4676000	5386200	10702000	22220000	15167000	20092000	14885000	3679400	10115000	51660000	22554000	21302000	2262600	2617600	5617400	12751000	17212000	25343000	16420000	11659000	14547000
Uronate isomerase OS=Escherichia coli (strain K12) OX=83333 GN=uxaC PE=2 SV=1	P0A8G3	uxaC	54 kDa	472960000	454850000	397740000	495510000	425730000	331380000	161470000	146690000	120740000	406620000	381960000	446740000	218430000	204230000	184830000	471870000	485020000	716410000	384550000	488600000	418570000
NAD(P)H dehydrogenase (quinone) OS=Escherichia coli (strain K12) OX=83333 GN=wrbA PE=1 SV=2	P0A8G6	wrbA	21 kDa	5847300000	6616600000	6682600000	6387300000	6467500000	3274100000	1463500000	1348400000	1649600000	2519300000	2011200000	2608600000	58544000	129450000	84522000	85925000	80644000	122390000	110510000	79292000	100190000
Exodeoxyribonuclease 7 small subunit OS=Escherichia coli (strain K12) OX=83333 GN=xseB PE=1 SV=2	P0A8G9	xseB	9 kDa	37818000	37471000	102010000	159000000	34761000	22781000	120780000	83405000	121630000	65715000	95939000	27506000	149480000	48942000	141090000	41513000	92405000	122800000	129370000	139750000	76511000
Der GTPase-activating protein YihI OS=Escherichia coli (strain K12) OX=83333 GN=yihI PE=1 SV=1	P0A8H6	yihI	19 kDa	257640000	258890000	304500000	396290000	251610000	207790000	168230000	102850000	125990000	148780000	191570000	176390000	134390000	189210000	151580000	215890000	202690000	226750000	181530000	194620000	177580000
Putative pre-16S rRNA nuclease OS=Escherichia coli (strain K12) OX=83333 GN=yqgF PE=1 SV=1	P0A8I1	yqgF	15 kDa	22055000	17487000	13502000	17588000	12900000	10620000	5247500	3727700	0	13311000	4055700	21234000	0	4458000	4874900	4453600	20267000	11293000	4058200	5898300	0
DNA-binding and peroxide stress resistance protein YaaA OS=Escherichia coli (strain K12) OX=83333 GN=yaaA PE=1 SV=1	P0A8I3	yaaA	30 kDa	278640000	417760000	214100000	200410000	146460000	101050000	158670000	40032000	151730000	40903000	120790000	86544000	284380000	591410000	414550000	285510000	364980000	132550000	102470000	250130000	271940000
tRNA (guanine-N(7)-)-methyltransferase OS=Escherichia coli (strain K12) OX=83333 GN=trmB PE=1 SV=1	P0A8I5	trmB	27 kDa	72515000	82068000	73310000	138940000	127980000	109430000	12922000	0	19734000	87589000	111780000	92060000	7916200	22659000	8910900	75630000	58616000	126180000	57307000	94440000	67644000
Ribosomal RNA large subunit methyltransferase H OS=Escherichia coli (strain K12) OX=83333 GN=rlmH PE=1 SV=1	P0A8I8	rlmH	17 kDa	5316200	8095600	7100400	10019000	29169000	14177000	0	0	0	10340000	9666800	8909500	0	0	0	7654500	0	0	0	0	7798600
Primosomal protein 1 OS=Escherichia coli (strain K12) OX=83333 GN=dnaT PE=1 SV=2	P0A8J2	dnaT	19 kDa	15786000	0	18779000	4064600	0	4968100	11651000	4036300	12896000	4511800	18248000	8048300	12849000	7427800	14091000	0	5823000	4340400	8389900	4000900	4045500
UPF0250 protein YbeD OS=Escherichia coli (strain K12) OX=83333 GN=ybeD PE=1 SV=1	P0A8J4	ybeD	10 kDa	295120000	449560000	468280000	176940000	142270000	109710000	108030000	100100000	112670000	133990000	109110000	106660000	175400000	303540000	163350000	279230000	277090000	350670000	150340000	179650000	156110000
ATP-dependent RNA helicase RhlB OS=Escherichia coli (strain K12) OX=83333 GN=rhlB PE=1 SV=2	P0A8J8	rhlB	47 kDa	197790000	193390000	191030000	132960000	98806000	106440000	109700000	87015000	95400000	136710000	136230000	189280000	112000000	139550000	110780000	147060000	170300000	229830000	159390000	165200000	164960000
Phosphatidylserine decarboxylase proenzyme OS=Escherichia coli (strain K12) OX=83333 GN=psd PE=1 SV=1	P0A8K1	psd	36 kDa	5283100	7181000	5538200	19595000	10155000	8518000	2132100	2512400	0	8943400	5755300	10817000	0	4833900	2979800	0	3184400	3212600	2324800	2242000	34040000
UPF0253 protein YaeP OS=Escherichia coli (strain K12) OX=83333 GN=yaeP PE=3 SV=1	P0A8K5	yaeP	7 kDa	74410000	59865000	78946000	117520000	59086000	59243000	51075000	50725000	51793000	30899000	35217000	34302000	32323000	41791000	34843000	34640000	23109000	38532000	18635000	33245000	16664000
Serine--tRNA ligase OS=Escherichia coli (strain K12) OX=83333 GN=serS PE=1 SV=1	P0A8L1	serS	48 kDa	1043700000	922500000	999570000	1506800000	1116200000	1039200000	797850000	795420000	905310000	1121400000	802760000	980620000	952820000	1251500000	1000100000	1350300000	1447200000	1541600000	1006700000	1199900000	1261700000
UPF0260 protein YcgN OS=Escherichia coli (strain K12) OX=83333 GN=ycgN PE=3 SV=1	P0A8L5	ycgN	18 kDa	0	0	0	0	7862100	41066000	0	0	0	0	8836400	0	0	0	0	0	0	0	0	12168000	0
Asparagine--tRNA ligase OS=Escherichia coli (strain K12) OX=83333 GN=asnS PE=1 SV=2	P0A8M0	asnS	53 kDa	1073100000	1301000000	769430000	1048900000	862360000	623740000	1048000000	714030000	1255100000	1002800000	1025900000	720380000	1133000000	1847400000	1445600000	1000400000	1036000000	1548600000	1297700000	1278600000	1094400000
Threonine--tRNA ligase OS=Escherichia coli (strain K12) OX=83333 GN=thrS PE=1 SV=1	P0A8M3	thrS	74 kDa	700920000	904650000	663950000	1257700000	820090000	724970000	725640000	600640000	887010000	934230000	813220000	945790000	606680000	890340000	659760000	1044300000	1249100000	1473100000	1141200000	1165200000	1015700000
UPF0265 protein YeeX OS=Escherichia coli (strain K12) OX=83333 GN=yeeX PE=1 SV=1	P0A8M6	yeeX	13 kDa	844940000	1094100000	986550000	994680000	1103000000	772740000	620600000	718690000	632040000	552900000	551970000	256820000	208260000	289140000	229830000	210350000	145130000	221370000	221460000	141650000	158120000
Macrodomain Ter protein OS=Escherichia coli (strain K12) OX=83333 GN=matP PE=1 SV=1	P0A8N0	matP	18 kDa	33686000	36497000	28875000	28506000	29302000	24911000	45018000	35658000	42000000	28183000	24360000	30318000	31009000	34995000	34817000	37933000	73541000	92166000	65203000	38747000	58560000
Lysine--tRNA ligase OS=Escherichia coli (strain K12) OX=83333 GN=lysS PE=1 SV=2	P0A8N3	lysS	58 kDa	3430600000	3456300000	3241300000	2918600000	1937400000	1752600000	2487800000	2399700000	2190300000	2491400000	2321800000	2466800000	2729500000	3444900000	2928200000	2283100000	2551200000	3197000000	2657600000	3138500000	2766600000
Lysine--tRNA ligase, heat inducible OS=Escherichia coli (strain K12) OX=83333 GN=lysU PE=1 SV=2	P0A8N5	lysU	58 kDa	3624500000	3916900000	3808100000	2918600000	1982800000	1752600000	2722700000	2399700000	2316300000	2495000000	2321800000	2506500000	3055800000	4106100000	3299500000	2924700000	3150200000	3970600000	3673800000	3794600000	3164600000
Elongation factor P--(R)-beta-lysine ligase OS=Escherichia coli (strain K12) OX=83333 GN=epmA PE=1 SV=1	P0A8N7	epmA	37 kDa	9421800	11946000	0	60347000	39059000	30401000	18109000	14499000	19915000	0	0	23759000	44607000	70890000	35248000	15851000	0	49585000	17555000	37969000	28964000
Probable Fe(2+)-trafficking protein OS=Escherichia coli (strain K12) OX=83333 GN=yggX PE=1 SV=2	P0A8P3	yggX	11 kDa	785220000	820380000	773460000	580810000	366970000	281090000	606910000	654590000	603420000	277710000	248600000	270800000	353120000	497150000	333110000	476830000	276100000	409570000	312270000	278840000	246560000
Fumarate reductase subunit C OS=Escherichia coli (strain K12) OX=83333 GN=frdC PE=1 SV=1	P0A8Q0	frdC	15 kDa	0	0	0	82777000	42522000	42032000	0	0	0	40718000	38830000	32486000	0	0	0	0	0	0	20716000	6241900	15946000
Regulator of ribonuclease activity A OS=Escherichia coli (strain K12) OX=83333 GN=rraA PE=1 SV=1	P0A8R0	rraA	17 kDa	519780000	520880000	560440000	250450000	205240000	181050000	508970000	438000000	509510000	207420000	183260000	353850000	345200000	308000000	221680000	281250000	340860000	453840000	482860000	186650000	314060000
Protein SlyX OS=Escherichia coli (strain K12) OX=83333 GN=slyX PE=3 SV=1	P0A8R4	slyX	8 kDa	4433800	0	0	0	4278800	0	0	8343800	9590500	14990000	0	0	0	0	0	3167600	5833600	0	0	3909600	0
HTH-type transcriptional regulator HdfR OS=Escherichia coli (strain K12) OX=83333 GN=hdfR PE=3 SV=1	P0A8R9	hdfR	32 kDa	12945000	6647000	1972300	9149400	15076000	15050000	3359500	0	0	21101000	24707000	19560000	0	0	0	19749000	10943000	12160000	9618400	10912000	12265000
HTH-type transcriptional regulator ArgP OS=Escherichia coli (strain K12) OX=83333 GN=argP PE=1 SV=1	P0A8S1	argP	33 kDa	22147000	12435000	23527000	30959000	33811000	31231000	22603000	19998000	22611000	30795000	42830000	33876000	0	3795500	0	41093000	45156000	62378000	58899000	64924000	44347000
Ribosomal protein L11 methyltransferase OS=Escherichia coli (strain K12) OX=83333 GN=prmA PE=1 SV=1	P0A8T1	prmA	32 kDa	37734000	47683000	35493000	63285000	43687000	40129000	9992200	5905800	19074000	28551000	33318000	35816000	121930000	172590000	13844000	115740000	35673000	25521000	32382000	43727000	30843000
DNA-directed RNA polymerase subunit beta' OS=Escherichia coli (strain K12) OX=83333 GN=rpoC PE=1 SV=1	P0A8T7	rpoC	155 kDa	2898400000	2967900000	3011400000	2688300000	1962700000	2211600000	2703800000	2853800000	3162000000	2697400000	2703500000	2647900000	2402500000	3378700000	2360500000	2204000000	2357000000	2866100000	2410600000	2390700000	2847000000
Protein Syd OS=Escherichia coli (strain K12) OX=83333 GN=syd PE=1 SV=1	P0A8U0	syd	21 kDa	20845000	26195000	22492000	43566000	17997000	17261000	0	4751700	7797600	19493000	2917800	16236000	7055000	0	10755000	15082000	15520000	5459200	14200000	10499000	10793000
UPF0294 protein YafD OS=Escherichia coli (strain K12) OX=83333 GN=yafD PE=3 SV=1	P0A8U2	yafD	30 kDa	10220000	12037000	14307000	10940000	11096000	12574000	8341000	9923800	10778000	16322000	11598000	11242000	0	0	0	3508800	4558500	4574600	4005400	3633700	7684400
Met repressor OS=Escherichia coli (strain K12) OX=83333 GN=metJ PE=1 SV=2	P0A8U6	metJ	12 kDa	32692000	122400000	90732000	225540000	226040000	196350000	102140000	66203000	103540000	100490000	171920000	168500000	81335000	113600000	82122000	45232000	186810000	107220000	243450000	167690000	188220000
Ribonuclease BN OS=Escherichia coli (strain K12) OX=83333 GN=rbn PE=1 SV=1	P0A8V0	rbn	33 kDa	336380000	38601000	0	53318000	8444600	21823000	0	0	0	43587000	134720000	21584000	0	0	4547700	0	15348000	61726000	16443000	18931000	8225400
DNA-directed RNA polymerase subunit beta OS=Escherichia coli (strain K12) OX=83333 GN=rpoB PE=1 SV=1	P0A8V2	rpoB	151 kDa	1651900000	2574000000	1938600000	2794700000	1641600000	1205100000	1361300000	1213400000	1238300000	1294500000	1177300000	1570300000	1558600000	2554100000	1436600000	1836500000	1324900000	3202700000	1385900000	1628200000	1419900000
Fatty acid metabolism regulator protein OS=Escherichia coli (strain K12) OX=83333 GN=fadR PE=1 SV=2	P0A8V6	fadR	27 kDa	27834000	30362000	26165000	59397000	33000000	29700000	11689000	0	8122200	42126000	12903000	25762000	0	0	0	94800000	46027000	57462000	48853000	51449000	33379000
HTH-type transcriptional repressor NanR OS=Escherichia coli (strain K12) OX=83333 GN=nanR PE=1 SV=1	P0A8W0	nanR	30 kDa	18563000	6218800	6813200	45550000	42232000	40820000	4073400	4493100	7935500	20788000	37622000	25951000	9179000	0	0	9363900	35103000	47729000	29785000	17326000	10988000
Transcriptional regulator SlyA OS=Escherichia coli (strain K12) OX=83333 GN=slyA PE=3 SV=1	P0A8W2	slyA	16 kDa	198480000	136320000	136270000	184230000	166150000	130620000	155300000	115780000	124180000	230970000	148970000	240330000	130570000	161700000	131350000	139190000	166940000	196940000	143920000	168780000	176370000
UPF0301 protein YqgE OS=Escherichia coli (strain K12) OX=83333 GN=yqgE PE=1 SV=1	P0A8W5	yqgE	21 kDa	111950000	123540000	103990000	79180000	56249000	81508000	84976000	65001000	72184000	110260000	70096000	57692000	53534000	88522000	62868000	52733000	58096000	56652000	82761000	60081000	67283000
UPF0304 protein YfbU OS=Escherichia coli (strain K12) OX=83333 GN=yfbU PE=1 SV=1	P0A8W8	yfbU	20 kDa	853830000	887160000	887010000	643240000	456510000	341040000	665520000	595840000	644130000	492000000	463790000	571780000	2521900000	899020000	664990000	460080000	544620000	584060000	607290000	521740000	451360000
UPF0307 protein YjgA OS=Escherichia coli (strain K12) OX=83333 GN=yjgA PE=1 SV=1	P0A8X0	yjgA	21 kDa	236310000	261940000	219150000	251730000	186690000	139440000	198860000	181360000	164800000	272120000	166020000	160580000	99081000	142270000	97969000	131540000	153060000	144840000	110720000	115400000	89427000
Protein YceI OS=Escherichia coli (strain K12) OX=83333 GN=yceI PE=1 SV=1	P0A8X2	yceI	21 kDa	89260000	92671000	104130000	15381000	15730000	13548000	46465000	46123000	49371000	21689000	17371000	21422000	101590000	144170000	69536000	58889000	380420000	51230000	57868000	51641000	52008000
Pyrimidine 5'-nucleotidase YjjG OS=Escherichia coli (strain K12) OX=83333 GN=yjjG PE=1 SV=1	P0A8Y1	yjjG	25 kDa	0	0	7528700	0	0	0	0	0	0	0	0	0	0	0	0	10792000	10498000	12903000	6727200	7451700	7313500
Alpha-D-glucose 1-phosphate phosphatase YihX OS=Escherichia coli (strain K12) OX=83333 GN=yihX PE=1 SV=1	P0A8Y3	yihX	23 kDa	44833000	76190000	31780000	145510000	104660000	118870000	16939000	24869000	21603000	90210000	109320000	89388000	34784000	39801000	36436000	97052000	91201000	131990000	98838000	90403000	100180000
Sugar phosphatase YidA OS=Escherichia coli (strain K12) OX=83333 GN=yidA PE=1 SV=1	P0A8Y5	yidA	30 kDa	285810000	246810000	200040000	142220000	111340000	86900000	163450000	221380000	237510000	146460000	150780000	172510000	241880000	303270000	235920000	234810000	249220000	192210000	143650000	277130000	204180000
Acyl-CoA thioester hydrolase YciA OS=Escherichia coli (strain K12) OX=83333 GN=yciA PE=3 SV=1	P0A8Z0	yciA	14 kDa	16832000	34907000	12492000	39933000	32307000	20671000	37971000	6200000	20584000	25078000	19380000	20327000	28872000	20157000	32617000	33167000	31932000	27467000	35161000	41239000	39093000
Acyl-CoA thioester hydrolase YbgC OS=Escherichia coli (strain K12) OX=83333 GN=ybgC PE=1 SV=1	P0A8Z3	ybgC	16 kDa	4675100	10507000	6146400	15294000	4088300	8011600	0	0	2575000	17182000	14044000	15949000	0	0	0	22806000	25395000	20276000	18960000	18330000	13395000
Outer membrane lipoprotein Blc OS=Escherichia coli (strain K12) OX=83333 GN=blc PE=1 SV=1	P0A901	blc	20 kDa	393930000	444680000	342530000	591950000	406940000	352190000	401730000	333260000	388700000	437900000	313340000	316520000	387450000	479200000	351690000	75784000	383520000	445940000	257340000	357370000	370450000
Outer membrane protein assembly factor BamC OS=Escherichia coli (strain K12) OX=83333 GN=bamC PE=1 SV=1	P0A903	bamC	37 kDa	76915000	70201000	73613000	22659000	11349000	4107300	78262000	58141000	70798000	10889000	0	9907200	62291000	67475000	61357000	2472700	15732000	2388400	25245000	12857000	15451000
Outer membrane lipoprotein SlyB OS=Escherichia coli (strain K12) OX=83333 GN=slyB PE=2 SV=1	P0A905	slyB	16 kDa	39558000	127030000	108480000	47143000	40956000	33035000	29627000	27056000	14823000	51537000	35880000	62818000	19292000	39182000	21947000	32252000	18258000	42404000	43523000	24328000	26476000
MltA-interacting protein OS=Escherichia coli (strain K12) OX=83333 GN=mipA PE=1 SV=1	P0A908	mipA	28 kDa	3196500	3404700	0	10401000	5665000	6108400	3734400	2975500	5047300	0	8346500	10239000	0	0	0	4622500	5211700	0	5608400	5570500	5035700
Outer membrane protein A OS=Escherichia coli (strain K12) OX=83333 GN=ompA PE=1 SV=1	P0A910	ompA	37 kDa	1089700000	944730000	594650000	1545200000	798950000	831240000	637780000	762650000	866690000	664540000	618240000	818610000	866370000	1296200000	831220000	689670000	577400000	734280000	597450000	517130000	486740000
Peptidoglycan-associated lipoprotein OS=Escherichia coli (strain K12) OX=83333 GN=pal PE=1 SV=1	P0A912	pal	19 kDa	14100000	10703000	9380100	33022000	22324000	16865000	7953400	8082100	0	13602000	7814300	37121000	9188800	12141000	12679000	9488100	11457000	11143000	11506000	5425100	8513300
Outer membrane protein X OS=Escherichia coli (strain K12) OX=83333 GN=ompX PE=1 SV=1	P0A917	ompX	19 kDa	28009000	32066000	29484000	0	8124300	6641600	69853000	33626000	15960000	0	0	0	20384000	29411000	89607000	6056200	7430900	0	0	5508800	4185900
Nucleoside-specific channel-forming protein Tsx OS=Escherichia coli (strain K12) OX=83333 GN=tsx PE=1 SV=1	P0A927	tsx	34 kDa	6567300	7716000	4811900	32074000	12482000	9374800	1991100	4862600	3432400	18146000	8845900	26206000	4454100	7227600	5821100	7479800	8423500	26053000	14717000	12110000	10713000
Outer membrane protein assembly factor BamA OS=Escherichia coli (strain K12) OX=83333 GN=bamA PE=1 SV=1	P0A940	bamA	91 kDa	85458000	86918000	57402000	14751000	36704000	16725000	51253000	41800000	55457000	31223000	45357000	47696000	56842000	130290000	66591000	108380000	59168000	66251000	67413000	120770000	44836000
[Ribosomal protein bS18]-alanine N-acetyltransferase OS=Escherichia coli (strain K12) OX=83333 GN=rimI PE=1 SV=1	P0A944	rimI	17 kDa	3714900	4422000	3823800	5754300	0	0	2611800	2929000	0	2630400	3858600	2676200	2055200	3643700	2913400	4007400	0	10517000	0	4349100	0
[Ribosomal protein uS5]-alanine N-acetyltransferase OS=Escherichia coli (strain K12) OX=83333 GN=rimJ PE=1 SV=1	P0A948	rimJ	23 kDa	0	0	0	11627000	16714000	10616000	0	0	0	2959000	6452700	2774600	0	0	0	10161000	11872000	13583000	0	11691000	11294000
Spermidine N(1)-acetyltransferase OS=Escherichia coli (strain K12) OX=83333 GN=speG PE=1 SV=2	P0A951	speG	22 kDa	61538000	68277000	54027000	51496000	68531000	56372000	49003000	36514000	44147000	73380000	66340000	70316000	17225000	24889000	35599000	96457000	107440000	110490000	88149000	112710000	93932000
3-oxoacyl-[acyl-carrier-protein] synthase 1 OS=Escherichia coli (strain K12) OX=83333 GN=fabB PE=1 SV=1	P0A953	fabB	43 kDa	1845500000	1966600000	1857500000	2235000000	1741000000	1367100000	2784800000	2487300000	2553000000	1674700000	1440100000	1580200000	2077300000	2808400000	2099600000	2427000000	2559100000	3297900000	2495300000	2470600000	2456500000
KHG/KDPG aldolase OS=Escherichia coli (strain K12) OX=83333 GN=eda PE=1 SV=1	P0A955	eda	22 kDa	2202700000	1927100000	1052000000	1230700000	1055500000	557130000	1298200000	735110000	522560000	1180200000	793360000	757990000	1208900000	2764900000	1156400000	1155000000	1791400000	2185900000	980210000	1369600000	1557000000
Glutamate-pyruvate aminotransferase AlaA OS=Escherichia coli (strain K12) OX=83333 GN=alaA PE=1 SV=1	P0A959	alaA	46 kDa	20910000	31738000	30421000	47018000	32953000	18471000	8756500	10862000	14752000	28802000	24725000	62682000	10862000	16109000	0	37177000	25902000	55014000	24346000	19008000	29518000
L-asparaginase 1 OS=Escherichia coli (strain K12) OX=83333 GN=ansA PE=1 SV=1	P0A962	ansA	37 kDa	64985000	93811000	81234000	57338000	36597000	9306400	40657000	41322000	59003000	73426000	46953000	40747000	66079000	80234000	54813000	69874000	78981000	94828000	73164000	72751000	69756000
Cold shock-like protein CspD OS=Escherichia coli (strain K12) OX=83333 GN=cspD PE=1 SV=1	P0A968	cspD	8 kDa	145620000	150410000	146680000	103990000	81101000	90824000	240140000	236220000	239670000	193230000	292750000	200430000	494720000	629360000	479150000	821740000	949640000	1046700000	660860000	896970000	847340000
Cold shock-like protein CspE OS=Escherichia coli (strain K12) OX=83333 GN=cspE PE=1 SV=2	P0A972	cspE	7 kDa	2274300000	2827400000	3071700000	1997100000	1312700000	1157700000	2104500000	2270200000	2064000000	819780000	871820000	697640000	1780600000	2554000000	2134700000	1939900000	2080200000	2549500000	1455900000	1500700000	1466500000
Cold shock-like protein CspG OS=Escherichia coli (strain K12) OX=83333 GN=cspG PE=1 SV=1	P0A978	cspG	8 kDa	340120000	407450000	332510000	124100000	104730000	100000000	414870000	561280000	669320000	80781000	77319000	61646000	396910000	0	364230000	0	243430000	283270000	231060000	215170000	175160000
Beta sliding clamp OS=Escherichia coli (strain K12) OX=83333 GN=dnaN PE=1 SV=1	P0A988	dnaN	41 kDa	184290000	168840000	170260000	181440000	166820000	125190000	120840000	98390000	95040000	125690000	127310000	127710000	95414000	142830000	113060000	140300000	129150000	201830000	156880000	159070000	120280000
Fructose-bisphosphate aldolase class 1 OS=Escherichia coli (strain K12) OX=83333 GN=fbaB PE=1 SV=2	P0A991	fbaB	38 kDa	1177000000	1319000000	1199800000	1412900000	1009800000	786400000	389050000	360750000	450420000	639090000	531630000	693850000	0	0	0	0	0	0	0	0	0
Fructose-1,6-bisphosphatase class 1 OS=Escherichia coli (strain K12) OX=83333 GN=fbp PE=1 SV=1	P0A993	fbp	37 kDa	96253000	101790000	71575000	293610000	234670000	197590000	76778000	67882000	73614000	230280000	212080000	273530000	64893000	102060000	65188000	346300000	388090000	489880000	323230000	405070000	331600000
Anaerobic glycerol-3-phosphate dehydrogenase subunit C OS=Escherichia coli (strain K12) OX=83333 GN=glpC PE=1 SV=1	P0A996	glpC	44 kDa	0	0	0	84128000	41199000	33722000	4973300	3070100	0	23948000	34411000	48751000	4475100	0	4240300	43108000	40467000	52321000	112230000	34850000	54143000
Bacterial non-heme ferritin OS=Escherichia coli (strain K12) OX=83333 GN=ftnA PE=1 SV=1	P0A998	ftnA	19 kDa	770680000	789560000	830130000	2132500000	1021600000	890930000	875480000	792680000	880340000	1477000000	1276000000	1314300000	1761000000	2275600000	1440300000	6397400000	5431300000	6394400000	3674700000	3690000000	3791000000
Cell division protein FtsZ OS=Escherichia coli (strain K12) OX=83333 GN=ftsZ PE=1 SV=1	P0A9A6	ftsZ	40 kDa	356050000	416730000	348890000	578760000	485890000	525460000	144890000	108980000	176110000	340050000	396850000	344920000	168300000	267820000	176650000	295400000	341710000	510180000	364480000	299740000	292310000
Ferric uptake regulation protein OS=Escherichia coli (strain K12) OX=83333 GN=fur PE=1 SV=1	P0A9A9	fur	17 kDa	1446900000	1385900000	788940000	676520000	767120000	404240000	889450000	727840000	884420000	615970000	532380000	594350000	1131500000	1529200000	855620000	1109900000	1270700000	1350900000	913560000	937830000	886460000
Glyceraldehyde-3-phosphate dehydrogenase A OS=Escherichia coli (strain K12) OX=83333 GN=gapA PE=1 SV=2	P0A9B2	gapA	36 kDa	24937000000	31077000000	25235000000	15450000000	11923000000	8500500000	13542000000	11983000000	12586000000	11954000000	8039500000	8384700000	15430000000	22639000000	14774000000	13273000000	13958000000	25802000000	11268000000	8894300000	10646000000
D-erythrose-4-phosphate dehydrogenase OS=Escherichia coli (strain K12) OX=83333 GN=epd PE=1 SV=2	P0A9B6	epd	37 kDa	16153000	36556000	10926000	63261000	73426000	59116000	26303000	20158000	30821000	246060000	38277000	68125000	7003300	0	7119600	33823000	47042000	47943000	61482000	88448000	59596000
Anaerobic glycerol-3-phosphate dehydrogenase subunit A OS=Escherichia coli (strain K12) OX=83333 GN=glpA PE=1 SV=1	P0A9C0	glpA	59 kDa	13494000	12054000	0	256400000	159140000	128480000	19873000	11323000	16243000	174240000	220490000	182020000	21741000	50935000	35388000	200310000	137610000	193290000	157170000	170460000	131100000
Aldose 1-epimerase OS=Escherichia coli (strain K12) OX=83333 GN=galM PE=1 SV=1	P0A9C3	galM	38 kDa	571350000	531980000	581620000	614770000	364300000	353810000	307590000	210390000	257320000	278510000	171090000	340570000	418770000	827670000	393390000	334580000	386180000	744950000	296020000	345060000	490510000
Glutamine synthetase OS=Escherichia coli (strain K12) OX=83333 GN=glnA PE=1 SV=2	P0A9C5	glnA	52 kDa	508000000	894450000	523500000	969230000	885420000	723660000	323550000	322260000	345450000	650380000	616360000	875480000	798090000	1095400000	613520000	1588100000	1906700000	2334700000	1452400000	1478400000	1258600000
Fructose-1,6-bisphosphatase 1 class 2 OS=Escherichia coli (strain K12) OX=83333 GN=glpX PE=1 SV=1	P0A9C9	glpX	36 kDa	76961000	99837000	79917000	198220000	116620000	112990000	22894000	18049000	20765000	69787000	60224000	56832000	24429000	36528000	23815000	35510000	34360000	51208000	27900000	29778000	29530000
Glutathione S-transferase GstA OS=Escherichia coli (strain K12) OX=83333 GN=gstA PE=1 SV=1	P0A9D2	gstA	23 kDa	258750000	484350000	305820000	259830000	337760000	138510000	144430000	153340000	140900000	173960000	115470000	145380000	121460000	298780000	220380000	291060000	372310000	369760000	435370000	381970000	404000000
Serine acetyltransferase OS=Escherichia coli (strain K12) OX=83333 GN=cysE PE=1 SV=1	P0A9D4	cysE	29 kDa	215720000	214480000	236840000	150280000	98283000	110420000	137540000	116830000	139050000	111470000	87250000	88469000	119240000	136100000	125010000	116580000	101950000	109200000	89079000	70782000	68159000
2,3,4,5-tetrahydropyridine-2,6-dicarboxylate N-succinyltransferase OS=Escherichia coli (strain K12) OX=83333 GN=dapD PE=1 SV=1	P0A9D8	dapD	30 kDa	1369800000	2663000000	2151100000	1110100000	1571300000	920010000	1244000000	1399200000	1568100000	1602900000	933730000	1020600000	1457200000	2304900000	1769000000	1918500000	1672100000	1710100000	1611300000	1200400000	1069300000
Arabinose operon regulatory protein OS=Escherichia coli (strain K12) OX=83333 GN=araC PE=1 SV=1	P0A9E0	araC	33 kDa	0	0	0	25637000	6844300	0	0	0	15892000	0	0	10873000	0	0	0	0	5381400	8307300	6676900	6213600	5938700
Regulatory protein SoxS OS=Escherichia coli (strain K12) OX=83333 GN=soxS PE=1 SV=2	P0A9E2	soxS	13 kDa	7774600	4556500	5906100	0	0	0	0	3413500	3750100	0	0	0	0	0	0	0	0	0	0	0	0
Fumarate and nitrate reduction regulatory protein OS=Escherichia coli (strain K12) OX=83333 GN=fnr PE=1 SV=1	P0A9E5	fnr	28 kDa	76242000	114520000	64853000	136700000	101460000	106930000	45209000	43952000	46651000	42529000	129160000	52850000	0	0	0	0	0	0	0	0	0
Transcriptional regulator MntR OS=Escherichia coli (strain K12) OX=83333 GN=mntR PE=1 SV=1	P0A9F1	mntR	18 kDa	6610600	103900000	13186000	208300000	14209000	138800000	9965000	5205600	11067000	0	113310000	89030000	14901000	19523000	12803000	32737000	109900000	70330000	114330000	15866000	24897000
HTH-type transcriptional regulator CysB OS=Escherichia coli (strain K12) OX=83333 GN=cysB PE=3 SV=1	P0A9F3	cysB	36 kDa	65739000	82938000	59898000	101110000	60751000	53367000	57314000	67913000	51173000	56724000	61128000	72799000	33025000	48369000	33097000	105880000	85005000	160630000	71510000	62024000	52443000
Glycine cleavage system transcriptional activator OS=Escherichia coli (strain K12) OX=83333 GN=gcvA PE=1 SV=1	P0A9F6	gcvA	34 kDa	0	13591000	3981700	12736000	9393000	12077000	5332700	0	0	23453000	15942000	11853000	0	0	1366000	10077000	9291500	14732000	4672700	4626700	3779700
Transcriptional activator protein NhaR OS=Escherichia coli (strain K12) OX=83333 GN=nhaR PE=1 SV=1	P0A9G2	nhaR	34 kDa	0	0	2582000	7804900	13266000	5264900	3357000	0	7327500	0	4838200	7119700	0	0	0	0	3380000	0	6150500	0	3673800
HTH-type transcriptional regulator CueR OS=Escherichia coli (strain K12) OX=83333 GN=cueR PE=1 SV=1	P0A9G4	cueR	15 kDa	5947600	0	0	0	0	0	0	0	0	0	0	0	0	0	0	7144100	0	13772000	8485600	5520900	10042000
Isocitrate lyase OS=Escherichia coli (strain K12) OX=83333 GN=aceA PE=1 SV=1	P0A9G6	aceA	48 kDa	2527300000	3007100000	2104700000	10935000000	8449900000	7208400000	2706600000	2461100000	3067000000	2142800000	2092300000	2406100000	612770000	774130000	570570000	403860000	625410000	876280000	855550000	592800000	627820000
DNA-binding transcriptional dual regulator ModE OS=Escherichia coli (strain K12) OX=83333 GN=modE PE=1 SV=1	P0A9G8	modE	28 kDa	62134000	10826000	10234000	64844000	28948000	60906000	32299000	16559000	20139000	96474000	40693000	52132000	19737000	14333000	2220900	124390000	180050000	75996000	65689000	58632000	54931000
G/U mismatch-specific DNA glycosylase OS=Escherichia coli (strain K12) OX=83333 GN=mug PE=1 SV=1	P0A9H1	mug	19 kDa	58273000	66232000	64059000	120290000	118380000	83172000	19981000	19412000	28761000	102760000	111030000	86230000	14316000	6412100	6620600	49855000	55911000	52964000	62341000	59781000	49052000
Inducible lysine decarboxylase OS=Escherichia coli (strain K12) OX=83333 GN=cadA PE=1 SV=1	P0A9H3	cadA	81 kDa	382590000	461810000	350040000	1642800000	1373400000	990210000	510600000	486830000	526310000	1313700000	1341000000	1264900000	100390000	116530000	71424000	533160000	402490000	480660000	419610000	469520000	373910000
Cyclopropane-fatty-acyl-phospholipid synthase OS=Escherichia coli (strain K12) OX=83333 GN=cfa PE=1 SV=2	P0A9H7	cfa	44 kDa	119980000	2489900000	2038700000	443130000	310290000	1703400000	44829000	2019500000	2320100000	2167200000	1973100000	2039700000	3774700	4386200	2938300	1451500	2938500	5849600	5089800	6863000	8118800
Glycine cleavage system transcriptional repressor OS=Escherichia coli (strain K12) OX=83333 GN=gcvR PE=1 SV=2	P0A9I3	gcvR	21 kDa	16562000	48171000	16935000	20655000	14366000	24844000	1742800	4660200	2679400	0	5173700	0	0	0	0	13111000	24848000	20920000	9039200	11821000	8229800
Ribonuclease G OS=Escherichia coli (strain K12) OX=83333 GN=rng PE=1 SV=2	P0A9J0	rng	55 kDa	94267000	67695000	67298000	66734000	61979000	44572000	45046000	34541000	48753000	48123000	55993000	51176000	35165000	38473000	30280000	57455000	48977000	64198000	44315000	46466000	45890000
2-dehydropantoate 2-reductase OS=Escherichia coli (strain K12) OX=83333 GN=panE PE=1 SV=1	P0A9J4	panE	34 kDa	0	0	0	23638000	7584300	2642500	0	0	0	2671800	1871700	2312000	0	0	0	0	0	0	0	0	0
Ribokinase OS=Escherichia coli (strain K12) OX=83333 GN=rbsK PE=1 SV=1	P0A9J6	rbsK	32 kDa	87216000	85620000	91318000	66683000	45158000	37472000	58822000	52837000	43568000	53764000	27403000	54230000	133890000	245130000	129080000	157670000	211650000	207290000	134450000	143680000	107510000
Bifunctional chorismate mutase/prephenate dehydratase OS=Escherichia coli (strain K12) OX=83333 GN=pheA PE=1 SV=1	P0A9J8	pheA	43 kDa	10363000	0	0	60834000	26213000	14974000	0	0	0	13545000	41486000	11494000	0	0	0	0	0	0	19022000	21291000	12489000
PhoH-like protein OS=Escherichia coli (strain K12) OX=83333 GN=ybeZ PE=1 SV=2	P0A9K3	ybeZ	39 kDa	290430000	314650000	267260000	359840000	267930000	257860000	85263000	76088000	94978000	162090000	171820000	181680000	103520000	128930000	100650000	229410000	242180000	306500000	135670000	124670000	117860000
Phosphate-specific transport system accessory protein PhoU OS=Escherichia coli (strain K12) OX=83333 GN=phoU PE=1 SV=1	P0A9K7	phoU	27 kDa	13430000	7421200	797480000	47758000	28825000	20631000	5508700	0	372100000	40094000	23721000	58826000	0	0	0	12869000	34734000	26437000	32217000	13133000	28711000
FKBP-type peptidyl-prolyl cis-trans isomerase SlyD OS=Escherichia coli (strain K12) OX=83333 GN=slyD PE=1 SV=1	P0A9K9	slyD	21 kDa	708240000	1840300000	784690000	378860000	342350000	286050000	226710000	374190000	314530000	308350000	185790000	197390000	57643000	1405700000	290060000	1917400000	384250000	671110000	294660000	274510000	284420000
FKBP-type 22 kDa peptidyl-prolyl cis-trans isomerase OS=Escherichia coli (strain K12) OX=83333 GN=fklB PE=1 SV=2	P0A9L3	fklB	22 kDa	1026400000	967610000	1118900000	1276800000	920040000	780760000	488760000	513540000	500330000	728270000	797800000	839710000	696380000	1073600000	589730000	1133800000	1284500000	1298500000	1157800000	691030000	1070600000
Peptidyl-prolyl cis-trans isomerase C OS=Escherichia coli (strain K12) OX=83333 GN=ppiC PE=1 SV=2	P0A9L5	ppiC	10 kDa	149900000	163200000	140040000	194720000	107800000	95804000	68595000	55059000	35280000	159000000	102190000	127140000	44199000	91788000	22778000	137060000	120040000	138150000	140220000	109340000	114040000
Pyrroline-5-carboxylate reductase OS=Escherichia coli (strain K12) OX=83333 GN=proC PE=1 SV=1	P0A9L8	proC	28 kDa	382690000	396640000	268690000	214330000	182430000	122150000	65425000	61133000	61112000	117060000	89605000	122320000	96763000	141740000	101270000	191420000	205430000	222470000	235380000	173130000	193180000
Lon protease OS=Escherichia coli (strain K12) OX=83333 GN=lon PE=1 SV=1	P0A9M0	lon	87 kDa	945230000	1110300000	992520000	774940000	434980000	611640000	488370000	559580000	721760000	602670000	545440000	597870000	599410000	1046300000	669690000	1114000000	883320000	1080900000	628910000	575000000	478190000
Hypoxanthine phosphoribosyltransferase OS=Escherichia coli (strain K12) OX=83333 GN=hpt PE=1 SV=1	P0A9M2	hpt	20 kDa	442170000	504360000	452360000	342450000	240060000	199020000	439820000	407810000	470170000	307310000	169840000	181590000	362760000	476440000	301180000	354390000	435850000	429540000	212820000	306040000	197180000
Xanthine-guanine phosphoribosyltransferase OS=Escherichia coli (strain K12) OX=83333 GN=gpt PE=1 SV=1	P0A9M5	gpt	17 kDa	286970000	379860000	353520000	287220000	219660000	176430000	278580000	223910000	262830000	222070000	167070000	212100000	235540000	415860000	263510000	271960000	303780000	187840000	222170000	267760000	238520000
Phosphate acetyltransferase OS=Escherichia coli (strain K12) OX=83333 GN=pta PE=1 SV=2	P0A9M8	pta	77 kDa	1148000000	1237300000	1176200000	1218000000	982320000	836880000	894250000	691400000	703670000	1343400000	1229900000	1331900000	735960000	1031200000	700080000	1116400000	1182700000	1450200000	874650000	1001200000	880350000
Pyruvate formate-lyase 1-activating enzyme OS=Escherichia coli (strain K12) OX=83333 GN=pflA PE=1 SV=2	P0A9N4	pflA	28 kDa	158870000	142800000	125940000	279830000	198400000	161310000	141030000	102520000	107290000	216790000	183740000	199970000	44050000	60849000	50238000	212570000	359980000	246080000	213100000	216710000	179440000
Anaerobic ribonucleoside-triphosphate reductase-activating protein OS=Escherichia coli (strain K12) OX=83333 GN=nrdG PE=1 SV=1	P0A9N8	nrdG	17 kDa	0	4566900	0	5957300	0	6263000	0	0	0	6409900	11112000	10271000	0	0	0	0	0	2617100	0	0	0
Dihydrolipoyl dehydrogenase OS=Escherichia coli (strain K12) OX=83333 GN=lpdA PE=1 SV=2	P0A9P0	lpdA	51 kDa	6233300000	6698600000	6339800000	4366000000	2504600000	2637100000	3029800000	2961300000	4638300000	3214100000	2602100000	2010300000	6613300000	13362000000	7388500000	8259700000	6692500000	8238700000	6920500000	5851300000	5283000000
Thioredoxin reductase OS=Escherichia coli (strain K12) OX=83333 GN=trxB PE=1 SV=2	P0A9P4	trxB	35 kDa	782070000	866280000	854050000	435200000	360590000	260820000	432250000	352090000	405930000	193320000	199930000	200550000	868550000	1172900000	754630000	845330000	740800000	862960000	629590000	631700000	524490000
ATP-dependent RNA helicase DeaD OS=Escherichia coli (strain K12) OX=83333 GN=deaD PE=1 SV=2	P0A9P6	deaD	71 kDa	218560000	166160000	112330000	127290000	82716000	125170000	464640000	317470000	531260000	141720000	94419000	111430000	133390000	152620000	122800000	146870000	99962000	244260000	74134000	166310000	74649000
5-keto-D-gluconate 5-reductase OS=Escherichia coli (strain K12) OX=83333 GN=idnO PE=1 SV=1	P0A9P9	idnO	28 kDa	0	0	0	2115500	0	0	0	0	0	0	0	3426900	0	0	0	9794500	8267300	11724000	9311400	11540000	16181000
Aerobic respiration control protein ArcA OS=Escherichia coli (strain K12) OX=83333 GN=arcA PE=1 SV=1	P0A9Q1	arcA	27 kDa	1238200000	1650900000	1411400000	2144300000	1680600000	1131000000	294800000	1527900000	268800000	895380000	781170000	899620000	2027000000	423180000	1897700000	485320000	2180900000	2982500000	1968600000	400950000	1826900000
Acetyl-coenzyme A carboxylase carboxyl transferase subunit beta OS=Escherichia coli (strain K12) OX=83333 GN=accD PE=1 SV=1	P0A9Q5	accD	33 kDa	133470000	192380000	148480000	497300000	313180000	182550000	77261000	57294000	68834000	326850000	352680000	342810000	48185000	154210000	85307000	312740000	424330000	348780000	389800000	344100000	406910000
Bifunctional aldehyde-alcohol dehydrogenase AdhE OS=Escherichia coli (strain K12) OX=83333 GN=adhE PE=1 SV=2	P0A9Q7	adhE	96 kDa	2744600000	3088100000	3046200000	1488600000	2650000000	829060000	447930000	288520000	344320000	646580000	402080000	760470000	722340000	1035600000	633180000	1579800000	1520300000	1467000000	827260000	676510000	662850000
Aspartate-semialdehyde dehydrogenase OS=Escherichia coli (strain K12) OX=83333 GN=asd PE=1 SV=1	P0A9Q9	asd	40 kDa	787400000	812140000	1026000000	638310000	345470000	347670000	332660000	385640000	470550000	310310000	238530000	427210000	560160000	937930000	496020000	804450000	498340000	1068000000	390600000	644900000	448530000
2Fe-2S ferredoxin OS=Escherichia coli (strain K12) OX=83333 GN=fdx PE=1 SV=2	P0A9R4	fdx	12 kDa	549200000	751550000	475730000	269340000	182590000	157040000	378690000	380930000	424330000	212450000	176580000	180590000	324840000	437840000	392230000	197210000	228210000	256650000	183360000	270170000	141830000
Cell division ATP-binding protein FtsE OS=Escherichia coli (strain K12) OX=83333 GN=ftsE PE=1 SV=1	P0A9R7	ftsE	24 kDa	4714300	4786000	4456600	8773000	7768000	5940700	3509000	6180100	8832500	9027100	8970700	6023200	13199000	14474000	4028700	9149900	17426000	9251900	5236100	10048000	5659300
Lactaldehyde reductase OS=Escherichia coli (strain K12) OX=83333 GN=fucO PE=1 SV=2	P0A9S1	fucO	41 kDa	4145600	6723700	3497600	33042000	27242000	18023000	7747300	20125000	6959400	71062000	57948000	48643000	141170000	214920000	150140000	489250000	422340000	723710000	361800000	576090000	381380000
Galactitol 1-phosphate 5-dehydrogenase OS=Escherichia coli (strain K12) OX=83333 GN=gatD PE=1 SV=1	P0A9S3	gatD	37 kDa	69056000	71297000	53711000	121280000	86733000	72610000	54037000	53605000	67474000	248530000	296440000	223730000	0	0	0	0	0	0	0	0	0
Glycerol dehydrogenase OS=Escherichia coli (strain K12) OX=83333 GN=gldA PE=1 SV=1	P0A9S5	gldA	39 kDa	149840000	163870000	86483000	351680000	262180000	203860000	78304000	51117000	73912000	268700000	276520000	290790000	65493000	57299000	29275000	84638000	104290000	195430000	76797000	89792000	96174000
D-3-phosphoglycerate dehydrogenase OS=Escherichia coli (strain K12) OX=83333 GN=serA PE=1 SV=2	P0A9T0	serA	44 kDa	109720000	126310000	134690000	57323000	52352000	39461000	114570000	98856000	102170000	126600000	101180000	113340000	128530000	161550000	127290000	179430000	199870000	222020000	150880000	159600000	116930000
Protein tas OS=Escherichia coli (strain K12) OX=83333 GN=tas PE=1 SV=1	P0A9T4	tas	39 kDa	138490000	140090000	133430000	63027000	27686000	7665400	78956000	68020000	66935000	63481000	46172000	52570000	79956000	81944000	75770000	40686000	90631000	58519000	39947000	54414000	53928000
Uncharacterized HTH-type transcriptional regulator YbaQ OS=Escherichia coli (strain K12) OX=83333 GN=ybaQ PE=1 SV=1	P0A9T6	ybaQ	13 kDa	7841500	5420800	5686700	0	1577200	0	5392000	6530900	0	0	4037200	3642500	0	0	0	0	0	0	0	0	0
Probable ATP-binding protein YbiT OS=Escherichia coli (strain K12) OX=83333 GN=ybiT PE=1 SV=1	P0A9U3	ybiT	60 kDa	262580000	129150000	210400000	158340000	190550000	83453000	821530000	62836000	67792000	206120000	144360000	218480000	58592000	1261000000	181220000	80547000	93718000	146910000	97877000	295430000	96918000
HTH-type transcriptional regulator PuuR OS=Escherichia coli (strain K12) OX=83333 GN=puuR PE=1 SV=1	P0A9U6	puuR	20 kDa	30134000	15377000	35864000	18046000	41646000	27683000	3945900	0	0	0	0	0	10295000	27979000	18711000	16110000	9431000	25973000	8378500	0	4472200
Lipopolysaccharide export system ATP-binding protein LptB OS=Escherichia coli (strain K12) OX=83333 GN=lptB PE=1 SV=2	P0A9V1	lptB	27 kDa	18444000	20750000	11582000	55688000	32103000	25548000	4688300	3250400	7997100	25118000	13358000	35110000	0	3530600	3986000	4509200	23474000	41637000	37935000	4808200	4410500
HTH-type transcriptional regulator UlaR OS=Escherichia coli (strain K12) OX=83333 GN=ulaR PE=1 SV=1	P0A9W0	ulaR	28 kDa	8101400	10777000	12640000	0	5065900	22271000	0	0	0	21055000	4579500	19301000	0	6016600	0	20866000	33082000	16218000	34467000	11926000	23978000
Energy-dependent translational throttle protein EttA OS=Escherichia coli (strain K12) OX=83333 GN=ettA PE=1 SV=2	P0A9W3	ettA	62 kDa	296210000	650890000	472670000	877860000	860170000	478910000	117980000	108580000	124300000	470490000	405610000	338420000	123600000	183360000	136330000	353670000	493390000	446550000	314460000	478680000	1106800000
Acid stress protein IbaG OS=Escherichia coli (strain K12) OX=83333 GN=ibaG PE=1 SV=1	P0A9W6	ibaG	9 kDa	122480000	112460000	123120000	101760000	67640000	54105000	100810000	92246000	113660000	88552000	72674000	79393000	64947000	94666000	64860000	85475000	73118000	97057000	77823000	67205000	66631000
Protein YrdA OS=Escherichia coli (strain K12) OX=83333 GN=yrdA PE=1 SV=1	P0A9W9	yrdA	20 kDa	207580000	159640000	228460000	209190000	103160000	128500000	107010000	94635000	89267000	85792000	86042000	74503000	95942000	136660000	93350000	145430000	91476000	134500000	138410000	85507000	82147000
Cell shape-determining protein MreB OS=Escherichia coli (strain K12) OX=83333 GN=mreB PE=1 SV=1	P0A9X4	mreB	37 kDa	169780000	214740000	176230000	320490000	302080000	219450000	101330000	74159000	99474000	451150000	254030000	266530000	99252000	148980000	101370000	222630000	248180000	293210000	226990000	188210000	173850000
Cold shock protein CspA OS=Escherichia coli (strain K12) OX=83333 GN=cspA PE=1 SV=2	P0A9X9	cspA	7 kDa	591450000	645340000	542560000	200130000	169320000	163510000	781150000	873450000	1096800000	135550000	95466000	116170000	760980000	803680000	486680000	498550000	387960000	472960000	318380000	378130000	321600000
Cold shock-like protein CspC OS=Escherichia coli (strain K12) OX=83333 GN=cspC PE=1 SV=2	P0A9Y6	cspC	7 kDa	3119600000	3367700000	3639300000	4059000000	3080300000	2374400000	2605300000	2620100000	2866000000	3573200000	3101900000	3656500000	1578200000	2319300000	1585700000	3450500000	3370300000	4481600000	3223000000	3115700000	2850900000
Nitrogen regulatory protein P-II 1 OS=Escherichia coli (strain K12) OX=83333 GN=glnB PE=1 SV=1	P0A9Z1	glnB	12 kDa	185040000	205110000	179530000	183370000	165290000	132940000	117380000	114880000	113830000	223220000	181090000	181390000	135720000	136530000	105610000	211530000	279070000	291930000	198480000	212180000	229480000
Phosphocarrier protein HPr OS=Escherichia coli (strain K12) OX=83333 GN=ptsH PE=1 SV=1	P0AA04	ptsH	9 kDa	924890000	1517800000	913360000	920800000	638770000	690960000	649160000	903280000	819620000	647080000	507170000	498070000	298560000	321980000	274010000	313320000	280810000	316760000	323740000	324650000	315850000
Large ribosomal subunit protein uL13 OS=Escherichia coli (strain K12) OX=83333 GN=rplM PE=1 SV=1	P0AA10	rplM	16 kDa	4688500000	6291300000	4739800000	5718200000	4814400000	4114900000	5420900000	5056300000	6513000000	4973600000	4070400000	4590900000	4604500000	6028000000	5346600000	4762200000	5771500000	5659400000	4795600000	4733700000	4015900000
DNA-binding dual transcriptional regulator OmpR OS=Escherichia coli (strain K12) OX=83333 GN=ompR PE=1 SV=1	P0AA16	ompR	27 kDa	132660000	198480000	138440000	287270000	243060000	173180000	59921000	47731000	56360000	226500000	168400000	253570000	67328000	76795000	66075000	194120000	233290000	226930000	244010000	165800000	174610000
Thioredoxin 1 OS=Escherichia coli (strain K12) OX=83333 GN=trxA PE=1 SV=2	P0AA25	trxA	12 kDa	5214000000	8376900000	6104400000	2869100000	2107400000	1742900000	5103800000	3763700000	4291400000	3086700000	2761800000	2209400000	3792500000	7098100000	5030300000	4127300000	3238900000	4826500000	2866000000	3215600000	3289200000
Putative sulfur carrier protein YedF OS=Escherichia coli (strain K12) OX=83333 GN=yedF PE=1 SV=1	P0AA31	yedF	9 kDa	0	0	0	51708000	40809000	27589000	0	0	0	38520000	5099200	7478700	0	0	0	26740000	43850000	116280000	45402000	70400000	11440000
Dual-specificity RNA pseudouridine synthase RluA OS=Escherichia coli (strain K12) OX=83333 GN=rluA PE=1 SV=2	P0AA37	rluA	25 kDa	3971800	0	113300000	3102400	7902400	5371600	0	5380700	0	1646000	0	0	0	0	0	3099300	0	4643900	4503700	0	0
Ribosomal large subunit pseudouridine synthase C OS=Escherichia coli (strain K12) OX=83333 GN=rluC PE=1 SV=1	P0AA39	rluC	36 kDa	65001000	66759000	63605000	61153000	47025000	36466000	90231000	88081000	98353000	63630000	58002000	68588000	74739000	102070000	73103000	67907000	84397000	111520000	70113000	74743000	72136000
tRNA pseudouridine synthase C OS=Escherichia coli (strain K12) OX=83333 GN=truC PE=1 SV=1	P0AA41	truC	30 kDa	27689000	25845000	6335700	17278000	24588000	13962000	37008000	28759000	36231000	9096900	0	0	7532900	40132000	29938000	10748000	26461000	0	5249100	16566000	2915800
Ribosomal small subunit pseudouridine synthase A OS=Escherichia coli (strain K12) OX=83333 GN=rsuA PE=1 SV=1	P0AA43	rsuA	26 kDa	294360000	309940000	262470000	306080000	226410000	198260000	252710000	252460000	265420000	164510000	174270000	168560000	251510000	309980000	214320000	236700000	206400000	286610000	215140000	188620000	199200000
Protein QmcA OS=Escherichia coli (strain K12) OX=83333 GN=qmcA PE=1 SV=1	P0AA53	qmcA	34 kDa	0	0	0	0	0	0	0	0	0	0	0	5730000	0	0	0	0	0	0	0	0	0
3-octaprenyl-4-hydroxybenzoate carboxy-lyase OS=Escherichia coli (strain K12) OX=83333 GN=ubiD PE=1 SV=1	P0AAB4	ubiD	56 kDa	19156000	93647000	40616000	85783000	81168000	116510000	72117000	56658000	79814000	108950000	82517000	116510000	90018000	137640000	91783000	266640000	223220000	157620000	212570000	269470000	212680000
UTP--glucose-1-phosphate uridylyltransferase OS=Escherichia coli (strain K12) OX=83333 GN=galF PE=1 SV=1	P0AAB6	galF	33 kDa	348670000	429270000	164310000	448070000	434800000	303700000	210990000	72855000	174380000	279620000	270870000	294090000	79278000	129700000	104600000	185910000	270150000	308750000	188150000	217240000	208730000
Universal stress protein D OS=Escherichia coli (strain K12) OX=83333 GN=uspD PE=2 SV=1	P0AAB8	uspD	16 kDa	70484000	91863000	98920000	200300000	161970000	126020000	12611000	0	0	63711000	32873000	167480000	0	0	0	20599000	34916000	0	57405000	35108000	78634000
Universal stress protein E OS=Escherichia coli (strain K12) OX=83333 GN=uspE PE=1 SV=2	P0AAC0	uspE	36 kDa	193940000	318380000	137610000	680440000	454440000	356890000	90361000	93966000	90822000	212670000	148220000	294290000	0	0	0	0	0	0	0	0	0
Iron-binding protein IscA OS=Escherichia coli (strain K12) OX=83333 GN=iscA PE=1 SV=1	P0AAC8	iscA	12 kDa	808480000	1240600000	1401100000	119170000	87182000	129120000	1373100000	642610000	1016200000	252420000	162540000	198340000	811530000	1047800000	634640000	95336000	86845000	93581000	54919000	60454000	149460000
Serine transporter SdaC OS=Escherichia coli (strain K12) OX=83333 GN=sdaC PE=1 SV=1	P0AAD6	sdaC	47 kDa	0	3557500	1918900	21595000	18756000	12061000	4742700	3734900	4017700	31862000	17985000	33248000	14361000	18781000	26779000	36966000	48879000	67785000	97600000	38940000	48457000
Arginine transport ATP-binding protein ArtP OS=Escherichia coli (strain K12) OX=83333 GN=artP PE=1 SV=1	P0AAF6	artP	27 kDa	4340000	27430000	20705000	23113000	33062000	13403000	0	1873800	0	7327700	0	9500700	0	0	0	0	0	0	3363500	0	0
Galactose/methyl galactoside import ATP-binding protein MglA OS=Escherichia coli (strain K12) OX=83333 GN=mglA PE=1 SV=1	P0AAG8	mglA	56 kDa	0	0	0	0	3367500	1863100	0	0	0	0	0	0	143540000	275790000	169740000	377000000	339570000	514380000	304870000	340690000	320880000
Phosphate import ATP-binding protein PstB OS=Escherichia coli (strain K12) OX=83333 GN=pstB PE=1 SV=2	P0AAH0	pstB	29 kDa	0	3924900	3002700	61561000	5674300	33087000	0	0	16474000	17896000	3929800	4154600	99950000	129360000	98823000	159820000	173910000	15005000	136660000	147620000	134390000
ATP-dependent zinc metalloprotease FtsH OS=Escherichia coli (strain K12) OX=83333 GN=ftsH PE=1 SV=1	P0AAI3	ftsH	71 kDa	78961000	73949000	48250000	166780000	124180000	94101000	39927000	26758000	45571000	97648000	44253000	90321000	37344000	44413000	32832000	70171000	80812000	99136000	39671000	23447000	30122000
3-oxoacyl-[acyl-carrier-protein] synthase 2 OS=Escherichia coli (strain K12) OX=83333 GN=fabF PE=1 SV=2	P0AAI5	fabF	43 kDa	878810000	794220000	740880000	959560000	859450000	480150000	733450000	827710000	1050400000	858150000	526320000	795640000	816640000	1579600000	830840000	769300000	971390000	1198700000	1149100000	872510000	956880000
Malonyl CoA-acyl carrier protein transacylase OS=Escherichia coli (strain K12) OX=83333 GN=fabD PE=1 SV=2	P0AAI9	fabD	32 kDa	618950000	936130000	637700000	748630000	1048100000	638490000	882990000	461350000	572980000	480030000	404070000	610870000	535590000	1239100000	1007500000	1123100000	984740000	1286400000	908020000	750330000	1047200000
Probable anaerobic dimethyl sulfoxide reductase chain YnfG OS=Escherichia coli (strain K12) OX=83333 GN=ynfG PE=3 SV=2	P0AAJ1	ynfG	23 kDa	0	0	0	8216800	15237000	12325000	0	0	0	28287000	31128000	18933000	0	0	0	0	0	0	0	0	0
Formate dehydrogenase-O iron-sulfur subunit OS=Escherichia coli (strain K12) OX=83333 GN=fdoH PE=1 SV=1	P0AAJ5	fdoH	33 kDa	0	0	0	46204000	25092000	9321200	0	0	0	8894900	0	17106000	5671200	6977700	7047000	0	0	7098600	14610000	300550	30447000
Hydrogenase-2 operon protein HybA OS=Escherichia coli (strain K12) OX=83333 GN=hybA PE=3 SV=1	P0AAJ8	hybA	36 kDa	0	0	0	25487000	17009000	11712000	0	0	0	5193100	17563000	25123000	0	0	0	52959000	34539000	31225000	114770000	92058000	56663000
Hydrogenase-2 operon protein HybE OS=Escherichia coli (strain K12) OX=83333 GN=hybE PE=1 SV=1	P0AAN1	hybE	18 kDa	0	0	0	0	0	0	0	0	0	6989800	4849100	7732200	0	0	0	0	0	0	6278700	0	0
Hydrogenase maturation factor HypB OS=Escherichia coli (strain K12) OX=83333 GN=hypB PE=1 SV=1	P0AAN3	hypB	32 kDa	9580100	17561000	11559000	133490000	91536000	47658000	0	0	0	64983000	108610000	84785000	0	0	0	0	0	12806000	0	0	0
Uncharacterized protein YaiA OS=Escherichia coli (strain K12) OX=83333 GN=yaiA PE=1 SV=1	P0AAN5	yaiA	7 kDa	0	29725000	26373000	0	0	0	0	0	0	0	0	0	0	0	0	0	0	0	0	0	0
Anti-adapter protein IraP OS=Escherichia coli (strain K12) OX=83333 GN=iraP PE=1 SV=1	P0AAN9	iraP	10 kDa	0	0	0	37334000	13171000	45621000	0	0	0	16895000	13162000	0	0	0	0	93399000	162790000	344670000	0	440260000	159100000
Transcriptional repressor FrmR OS=Escherichia coli (strain K12) OX=83333 GN=frmR PE=1 SV=1	P0AAP3	frmR	10 kDa	3832800	5419100	2299300	98041000	49529000	43925000	5303000	8496400	9306600	52525000	39711000	46600000	1818300	15516000	1837300	20068000	22895000	22897000	21403000	20203000	28182000
Putative HNH nuclease YajD OS=Escherichia coli (strain K12) OX=83333 GN=yajD PE=3 SV=1	P0AAQ2	yajD	13 kDa	0	5388500	3549200	32162000	46315000	20354000	9273900	0	13872000	19820000	20832000	42066000	0	10493000	0	107560000	89421000	140470000	186430000	115360000	143580000
Cys-tRNA(Pro)/Cys-tRNA(Cys) deacylase YbaK OS=Escherichia coli (strain K12) OX=83333 GN=ybaK PE=1 SV=1	P0AAR3	ybaK	17 kDa	132970000	140680000	124770000	56599000	78683000	63302000	46207000	47712000	35488000	47435000	59229000	72698000	25958000	47600000	33344000	56778000	65695000	35464000	24168000	61304000	32561000
Inner membrane protein YlaC OS=Escherichia coli (strain K12) OX=83333 GN=ylaC PE=1 SV=2	P0AAS0	ylaC	18 kDa	0	0	0	0	3842900	1515900	0	0	0	0	0	0	0	0	0	2974200	8789300	4296700	15988000	3859600	9346100
Putative RNA-binding protein YbcJ OS=Escherichia coli (strain K12) OX=83333 GN=ybcJ PE=1 SV=1	P0AAS7	ybcJ	7 kDa	225910000	248710000	218520000	144970000	119450000	99114000	165190000	162360000	66992000	69326000	40403000	109440000	174700000	216050000	77583000	84639000	147650000	174890000	115710000	130130000	120590000
Uncharacterized protein YbdF OS=Escherichia coli (strain K12) OX=83333 GN=ybdF PE=4 SV=1	P0AAT2	ybdF	14 kDa	2382000	6373300	2609600	0	2584200	0	2815200	2398100	3074900	2510200	2538500	4654400	6987600	7678500	2794200	3931700	6631000	8327400	8303700	5864500	6051300
Ribosomal silencing factor RsfS OS=Escherichia coli (strain K12) OX=83333 GN=rsfS PE=1 SV=1	P0AAT6	rsfS	12 kDa	176930000	79757000	46914000	186620000	184750000	141920000	207260000	184040000	248550000	203880000	151130000	152340000	82837000	167120000	85855000	282380000	43395000	165990000	55345000	233060000	130500000
Uncharacterized protein YbeL OS=Escherichia coli (strain K12) OX=83333 GN=ybeL PE=4 SV=1	P0AAT9	ybeL	19 kDa	657050000	852650000	681350000	891070000	714250000	619300000	410550000	319720000	307060000	384950000	272550000	379340000	231350000	365270000	243380000	247980000	390200000	354550000	201480000	288440000	211420000
Uncharacterized protein YbfE OS=Escherichia coli (strain K12) OX=83333 GN=ybfE PE=1 SV=2	P0AAU7	ybfE	11 kDa	0	0	0	5443000	7890200	3806400	12398000	7814400	7246800	0	0	0	0	0	8039000	0	0	0	0	0	0
5-oxoprolinase subunit B OS=Escherichia coli (strain K12) OX=83333 GN=pxpB PE=1 SV=1	P0AAV4	pxpB	24 kDa	15070000	5594500	8355400	12710000	22097000	23409000	13791000	2995400	6280200	26233000	11893000	20795000	0	0	0	15687000	18852000	21585000	18612000	29714000	17812000
Uncharacterized protein YbgS OS=Escherichia coli (strain K12) OX=83333 GN=ybgS PE=3 SV=1	P0AAV6	ybgS	13 kDa	23681000	22380000	28473000	16562000	14813000	13080000	6652700	5423600	5074200	3012400	2531700	2886600	0	0	0	0	0	0	0	0	0
Probable L,D-transpeptidase YbiS OS=Escherichia coli (strain K12) OX=83333 GN=ybiS PE=1 SV=1	P0AAX8	ybiS	33 kDa	307060000	386010000	281800000	185210000	103530000	99897000	140130000	125140000	172310000	208250000	144970000	177020000	148280000	277710000	125230000	145860000	212880000	322620000	173140000	175800000	257420000
Uncharacterized protein YbjN OS=Escherichia coli (strain K12) OX=83333 GN=ybjN PE=1 SV=1	P0AAY6	ybjN	18 kDa	0	8447000	4924000	18847000	17083000	12045000	4278100	4212900	0	15182000	14988000	16107000	0	0	0	15341000	17665000	6453100	14754000	12218000	13369000
Replication-associated recombination protein A OS=Escherichia coli (strain K12) OX=83333 GN=rarA PE=1 SV=1	P0AAZ4	rarA	50 kDa	2934000	4022700	2800100	24776000	21065000	15849000	0	0	0	5093400	4647800	10520000	0	0	0	10776000	0	5603900	0	0	9996700
UPF0434 protein YcaR OS=Escherichia coli (strain K12) OX=83333 GN=ycaR PE=1 SV=1	P0AAZ7	ycaR	7 kDa	65670000	77959000	66698000	60994000	44982000	32879000	66763000	62228000	69268000	86269000	77895000	27636000	65496000	88356000	51502000	61705000	64362000	37286000	75990000	63403000	60708000
Uncharacterized protein YcbJ OS=Escherichia coli (strain K12) OX=83333 GN=ycbJ PE=4 SV=1	P0AB03	ycbJ	34 kDa	0	0	0	32026000	15496000	18660000	0	0	0	22409000	15094000	20017000	0	0	0	2256400	2561400	3028700	7695200	5779900	4758800
Inner membrane protein YccF OS=Escherichia coli (strain K12) OX=83333 GN=yccF PE=1 SV=1	P0AB12	yccF	16 kDa	0	0	0	0	6599900	4278200	0	0	0	6799900	3669800	5881900	0	0	0	0	3182100	4563200	3844500	0	0
Uncharacterized protein YccJ OS=Escherichia coli (strain K12) OX=83333 GN=yccJ PE=1 SV=1	P0AB14	yccJ	9 kDa	1374000000	1545500000	1401000000	2154600000	1455700000	1368900000	150350000	110300000	109730000	215340000	189810000	212970000	0	0	0	0	0	0	0	0	0
Sulfurtransferase TusE OS=Escherichia coli (strain K12) OX=83333 GN=tusE PE=1 SV=1	P0AB18	tusE	12 kDa	24481000	25718000	13438000	20863000	13452000	24560000	14010000	19415000	22465000	0	16063000	15332000	26774000	17592000	12179000	14363000	17869000	21181000	17919000	16001000	14617000
Iron uptake system component EfeO OS=Escherichia coli (strain K12) OX=83333 GN=efeO PE=1 SV=1	P0AB24	efeO	41 kDa	205720000	131130000	169440000	33652000	36250000	30498000	50911000	44243000	56239000	6925500	6351000	5647100	64014000	69276000	66855000	18502000	29162000	20649000	14308000	32435000	9698500
Large ribosomal RNA subunit accumulation protein YceD OS=Escherichia coli (strain K12) OX=83333 GN=yceD PE=2 SV=1	P0AB28	yceD	19 kDa	125690000	150710000	131040000	162180000	151830000	115130000	127850000	138140000	177790000	126840000	155740000	125320000	105490000	176980000	129690000	170760000	173920000	187950000	168500000	165140000	156310000
Protein YcgL OS=Escherichia coli (strain K12) OX=83333 GN=ycgL PE=1 SV=3	P0AB43	ycgL	12 kDa	115430000	81182000	113770000	58897000	25678000	43425000	125510000	118700000	117060000	95636000	78386000	89063000	81869000	114420000	78296000	69450000	82748000	81526000	65549000	64043000	58681000
Uncharacterized protein YmgD OS=Escherichia coli (strain K12) OX=83333 GN=ymgD PE=1 SV=2	P0AB46	ymgD	12 kDa	0	132250000	0	4169200	2513300	123140000	2389100	4349000	2072600	15908000	88307000	116690000	0	0	3590900	0	2941400	0	3207400	4038800	5685700
Protein YchN OS=Escherichia coli (strain K12) OX=83333 GN=ychN PE=1 SV=1	P0AB52	ychN	13 kDa	241300000	214160000	321830000	276070000	193230000	162350000	202720000	185200000	120900000	225950000	187500000	183950000	332790000	451910000	289750000	580260000	629030000	744380000	495500000	531050000	610610000
Protein YciI OS=Escherichia coli (strain K12) OX=83333 GN=yciI PE=1 SV=1	P0AB55	yciI	11 kDa	60806000	85481000	74509000	44785000	30037000	25038000	83716000	54865000	65437000	37916000	29986000	51457000	55516000	100880000	62227000	60194000	57169000	94880000	66229000	56503000	67132000
Protein YciN OS=Escherichia coli (strain K12) OX=83333 GN=yciN PE=1 SV=1	P0AB61	yciN	9 kDa	297600000	380010000	326270000	300890000	286420000	204990000	309120000	256090000	328210000	200630000	203360000	190340000	256110000	282180000	225750000	214730000	239220000	284340000	209970000	87646000	213850000
Acylphosphatase OS=Escherichia coli (strain K12) OX=83333 GN=yccX PE=1 SV=1	P0AB65	yccX	10 kDa	20440000	44883000	57640000	35895000	61092000	11388000	0	23433000	20627000	11075000	9536200	34399000	4913800	0	9908500	13335000	16957000	23493000	16730000	22622000	32146000
NAD(P) transhydrogenase subunit beta OS=Escherichia coli (strain K12) OX=83333 GN=pntB PE=1 SV=1	P0AB67	pntB	49 kDa	0	0	0	93158000	63233000	29333000	0	0	0	68450000	44004000	75842000	0	0	8760500	33209000	36326000	52869000	55823000	43367000	41908000
Fructose-bisphosphate aldolase class 2 OS=Escherichia coli (strain K12) OX=83333 GN=fbaA PE=1 SV=2	P0AB71	fbaA	39 kDa	16972000000	14102000000	19658000000	10927000000	9375200000	6782000000	9002900000	7650700000	9234800000	5952000000	5256300000	5302800000	8833200000	12421000000	9261900000	8799200000	6527600000	9705900000	6473800000	7055700000	6854100000
2-amino-3-ketobutyrate coenzyme A ligase OS=Escherichia coli (strain K12) OX=83333 GN=kbl PE=1 SV=1	P0AB77	kbl	43 kDa	950580000	1002900000	884170000	928980000	685370000	593960000	918410000	886130000	822470000	675890000	611580000	766570000	1697700000	2279900000	1625600000	2010600000	1652100000	2707100000	1321200000	1477800000	1958700000
Branched-chain-amino-acid aminotransferase OS=Escherichia coli (strain K12) OX=83333 GN=ilvE PE=1 SV=2	P0AB80	ilvE	34 kDa	127450000	194550000	58124000	140820000	122770000	71454000	92339000	35084000	39425000	129800000	109900000	109550000	151520000	165550000	114030000	47708000	60833000	139420000	32602000	117640000	97750000
Endonuclease III OS=Escherichia coli (strain K12) OX=83333 GN=nth PE=1 SV=1	P0AB83	nth	24 kDa	0	0	0	0	0	0	9219600	3612000	0	0	0	14164000	6315100	7019000	0	0	0	0	0	0	0
L-fuculose phosphate aldolase OS=Escherichia coli (strain K12) OX=83333 GN=fucA PE=1 SV=1	P0AB87	fucA	24 kDa	0	0	0	0	25662000	0	0	0	0	0	0	0	0	0	0	7738100	0	0	5765000	0	7072800
Adenylosuccinate lyase OS=Escherichia coli (strain K12) OX=83333 GN=purB PE=1 SV=1	P0AB89	purB	52 kDa	404420000	450730000	403560000	448040000	505840000	240900000	228850000	423230000	236470000	388190000	378990000	281600000	288820000	336600000	238120000	278050000	282800000	348840000	241550000	268260000	577120000
Phospho-2-dehydro-3-deoxyheptonate aldolase, Phe-sensitive OS=Escherichia coli (strain K12) OX=83333 GN=aroG PE=1 SV=1	P0AB91	aroG	38 kDa	235500000	175040000	234590000	183720000	134470000	125720000	145870000	149160000	135970000	179520000	152400000	226960000	66184000	119300000	86702000	136900000	128420000	209380000	171200000	187630000	156520000
Arsenate reductase OS=Escherichia coli (strain K12) OX=83333 GN=arsC PE=2 SV=1	P0AB96	arsC	16 kDa	0	0	0	0	0	0	0	0	0	0	0	0	433700000	681570000	373550000	435100000	463640000	550840000	0	3011600	0
ATP synthase subunit b OS=Escherichia coli (strain K12) OX=83333 GN=atpF PE=1 SV=1	P0ABA0	atpF	17 kDa	58707000	101330000	76017000	237710000	203050000	175040000	67895000	39979000	80931000	163180000	131120000	208110000	101490000	120110000	93894000	160160000	188990000	265160000	265860000	146140000	184870000
ATP synthase subunit delta OS=Escherichia coli (strain K12) OX=83333 GN=atpH PE=1 SV=1	P0ABA4	atpH	19 kDa	98103000	77673000	119040000	174690000	196730000	124260000	57747000	37330000	60432000	98983000	37775000	201510000	108900000	158360000	86821000	192070000	244490000	150500000	187050000	151430000	136030000
ATP synthase gamma chain OS=Escherichia coli (strain K12) OX=83333 GN=atpG PE=1 SV=1	P0ABA6	atpG	32 kDa	114100000	164170000	104410000	222490000	156110000	111710000	96582000	83501000	110310000	128770000	111990000	144210000	92168000	123790000	88512000	132420000	162040000	189740000	211550000	129530000	121360000
ATP synthase subunit alpha OS=Escherichia coli (strain K12) OX=83333 GN=atpA PE=1 SV=1	P0ABB0	atpA	55 kDa	717790000	753300000	678660000	1059400000	786270000	654330000	630230000	521710000	622970000	830970000	636710000	767150000	573350000	807800000	623210000	735180000	1103500000	934120000	1238200000	913580000	701130000
ATP synthase subunit beta OS=Escherichia coli (strain K12) OX=83333 GN=atpD PE=1 SV=2	P0ABB4	atpD	50 kDa	626330000	743800000	572970000	1084900000	625050000	583780000	489950000	445750000	524890000	730350000	512870000	739540000	572580000	738650000	487960000	648680000	727790000	1153300000	823920000	535470000	840350000
Magnesium-transporting ATPase, P-type 1 OS=Escherichia coli (strain K12) OX=83333 GN=mgtA PE=1 SV=1	P0ABB8	mgtA	99 kDa	0	3461600	0	0	20195000	11178000	15821000	15427000	16272000	32186000	21107000	37669000	4359200	8880600	4126300	0	8418000	0	7780000	0	3402500
Modulator of FtsH protease HflC OS=Escherichia coli (strain K12) OX=83333 GN=hflC PE=1 SV=1	P0ABC3	hflC	38 kDa	41244000	63422000	40665000	71206000	77918000	60617000	51980000	18339000	38914000	41813000	31794000	36785000	56741000	43088000	17928000	34571000	37133000	56678000	93107000	28531000	33347000
Modulator of FtsH protease HflK OS=Escherichia coli (strain K12) OX=83333 GN=hflK PE=1 SV=1	P0ABC7	hflK	46 kDa	38293000	43806000	40208000	80862000	66879000	74274000	29648000	22507000	28905000	56134000	29798000	60101000	19422000	45999000	38580000	26217000	48445000	53276000	69735000	30649000	38910000
Bacterioferritin OS=Escherichia coli (strain K12) OX=83333 GN=bfr PE=1 SV=1	P0ABD3	bfr	18 kDa	4056300000	3009400000	4657800000	8091000000	5734400000	3924000000	776200000	958060000	913790000	1194600000	701620000	1288100000	70741000	147420000	106450000	162660000	119300000	95276000	90225000	139400000	71386000
Acetyl-coenzyme A carboxylase carboxyl transferase subunit alpha OS=Escherichia coli (strain K12) OX=83333 GN=accA PE=1 SV=2	P0ABD5	accA	35 kDa	324870000	348460000	199180000	904240000	430150000	405690000	125560000	90915000	90428000	327550000	443480000	508540000	135740000	198790000	139590000	596700000	598540000	973560000	487540000	987520000	726190000
Biotin carboxyl carrier protein of acetyl-CoA carboxylase OS=Escherichia coli (strain K12) OX=83333 GN=accB PE=1 SV=1	P0ABD8	accB	17 kDa	886050000	1567500000	1071700000	1351800000	739980000	557160000	968570000	739960000	1081700000	1246900000	911170000	923740000	932860000	1261700000	805390000	992580000	1691000000	1162800000	883340000	1198500000	942250000
DNA-binding transcriptional regulator BolA OS=Escherichia coli (strain K12) OX=83333 GN=bolA PE=1 SV=1	P0ABE2	bolA	12 kDa	0	0	0	503320000	291630000	197310000	6031600	5316400	7006000	14335000	60788000	61489000	0	0	0	4498800	5314600	6376000	8838500	10300000	29876000
Poly(A) polymerase I OS=Escherichia coli (strain K12) OX=83333 GN=pcnB PE=1 SV=2	P0ABF1	pcnB	54 kDa	62166000	157450000	172800000	83068000	63724000	86949000	106700000	61198000	66219000	65918000	67902000	70702000	60369000	79041000	56659000	81250000	81426000	83529000	95306000	68265000	74853000
Bacterial microcompartment shell protein EutM OS=Escherichia coli (strain K12) OX=83333 GN=eutM PE=1 SV=1	P0ABF4	eutM	10 kDa	0	0	0	8344200	5575500	5118400	1270500	5657700	0	11642000	7074500	10582000	3921200	5327700	9228800	19763000	30486000	49851000	29537000	37321000	46379000
Cytidine deaminase OS=Escherichia coli (strain K12) OX=83333 GN=cdd PE=1 SV=1	P0ABF6	cdd	32 kDa	1831900000	2075500000	3981700000	2443900000	3651000000	2977300000	4055900000	4986500000	4474600000	4218600000	4090400000	4803200000	1041000000	1851900000	1323500000	336400000	393900000	690120000	380840000	200500000	685190000
Cell division protein FtsA OS=Escherichia coli (strain K12) OX=83333 GN=ftsA PE=1 SV=1	P0ABH0	ftsA	45 kDa	0	14436000	0	82307000	65133000	61220000	19719000	13102000	13212000	37315000	49896000	61478000	0	0	0	63062000	36731000	105970000	48955000	56436000	0
Citrate synthase OS=Escherichia coli (strain K12) OX=83333 GN=gltA PE=1 SV=1	P0ABH7	gltA	48 kDa	3497900000	4840900000	3699200000	4290300000	3195100000	2737400000	550990000	563800000	607810000	1185300000	1056300000	1117200000	6665500000	10040000000	6595300000	7822100000	9516400000	9435900000	7021000000	6641200000	6354300000
ATP-dependent Clp protease ATP-binding subunit ClpA OS=Escherichia coli (strain K12) OX=83333 GN=clpA PE=1 SV=1	P0ABH9	clpA	84 kDa	114800000	168990000	687080000	1479900000	345060000	223840000	45448000	48489000	50643000	820390000	113880000	954260000	60940000	110450000	72743000	86899000	124600000	150300000	99602000	63333000	92018000
Cytochrome bo(3) ubiquinol oxidase subunit 1 OS=Escherichia coli (strain K12) OX=83333 GN=cyoB PE=1 SV=1	P0ABI8	cyoB	74 kDa	54828000	68458000	42893000	36568000	52847000	47021000	8749600	6535500	4942500	1657000	3909400	8428200	44537000	68902000	73299000	81537000	114070000	147390000	120180000	53505000	84127000
Cytochrome bo(3) ubiquinol oxidase subunit 2 OS=Escherichia coli (strain K12) OX=83333 GN=cyoA PE=1 SV=1	P0ABJ1	cyoA	35 kDa	0	34925000	18491000	38183000	27519000	26688000	11103000	0	0	0	0	7730700	20349000	23552000	29739000	60565000	75135000	2916400000	93785000	32396000	67774000
Cytochrome bd-I ubiquinol oxidase subunit 1 OS=Escherichia coli (strain K12) OX=83333 GN=cydA PE=1 SV=1	P0ABJ9	cydA	58 kDa	19942000	27910000	13141000	180080000	182170000	142580000	89896000	106160000	111590000	320360000	247960000	396900000	14154000	15617000	33821000	135020000	142040000	156810000	295200000	140180000	158610000
Cytochrome bd-I ubiquinol oxidase subunit 2 OS=Escherichia coli (strain K12) OX=83333 GN=cydB PE=1 SV=1	P0ABK2	cydB	42 kDa	0	0	0	24859000	38306000	31463000	16419000	0	10903000	67208000	24671000	40642000	0	0	3500600	31318000	12471000	8464100	63888000	32190000	41999000
Cysteine synthase A OS=Escherichia coli (strain K12) OX=83333 GN=cysK PE=1 SV=2	P0ABK5	cysK	34 kDa	6655500000	6612900000	7957600000	1766300000	1883800000	1015000000	3220300000	4174700000	3551000000	1070600000	1270700000	495650000	4940200000	5434200000	5552300000	2186200000	4459500000	6044700000	1073900000	1830300000	805730000
Cytochrome c-552 OS=Escherichia coli (strain K12) OX=83333 GN=nrfA PE=1 SV=1	P0ABK9	nrfA	54 kDa	0	0	0	50496000	41379000	41301000	0	0	0	96851000	90045000	69823000	0	0	0	0	0	0	0	0	31248000
C4-dicarboxylate transporter DcuA OS=Escherichia coli (strain K12) OX=83333 GN=dcuA PE=1 SV=1	P0ABN5	dcuA	46 kDa	0	0	0	13484000	23939000	8439700	0	0	0	55847000	17496000	64548000	0	0	0	0	7618200	24748000	37387000	0	25657000
Purine nucleoside phosphorylase DeoD-type OS=Escherichia coli (strain K12) OX=83333 GN=deoD PE=1 SV=2	P0ABP8	deoD	26 kDa	4292100000	5089700000	3828800000	3957700000	2508600000	2091500000	2240100000	2146800000	2664200000	4234500000	3566400000	2816000000	2795700000	3983900000	2898500000	2352200000	2029600000	3000600000	1989000000	2256600000	1251200000
Coenzyme A biosynthesis bifunctional protein CoaBC OS=Escherichia coli (strain K12) OX=83333 GN=coaBC PE=1 SV=2	P0ABQ0	coaBC	43 kDa	55943000	71856000	36641000	132750000	131070000	55465000	6980400	5424600	13173000	74798000	89676000	106350000	14968000	9213100	9445900	101830000	108370000	154310000	111370000	107760000	102020000
2-hydroxy-3-oxopropionate reductase OS=Escherichia coli (strain K12) OX=83333 GN=garR PE=1 SV=1	P0ABQ2	garR	30 kDa	443310000	72615000	395660000	1383200000	149170000	761040000	18542000	43719000	99102000	91120000	197910000	110350000	109250000	147670000	158510000	1552300000	1728100000	2036000000	1262500000	1881300000	1174600000
Dihydrofolate reductase OS=Escherichia coli (strain K12) OX=83333 GN=folA PE=1 SV=1	P0ABQ4	folA	18 kDa	160360000	160920000	139000000	110490000	93110000	105320000	83168000	73149000	87590000	77445000	62489000	73706000	85006000	81267000	88981000	114880000	109760000	125460000	120780000	129550000	101540000
DNA damage-inducible protein I OS=Escherichia coli (strain K12) OX=83333 GN=dinI PE=1 SV=1	P0ABR1	dinI	9 kDa	74954000	25788000	43991000	0	0	7256300	0	0	0	0	0	0	8586200	0	7511900	0	3840100	15836000	0	3113400	3138600
RNA polymerase-binding transcription factor DksA OS=Escherichia coli (strain K12) OX=83333 GN=dksA PE=1 SV=1	P0ABS1	dksA	18 kDa	862510000	1137300000	870810000	1365300000	866290000	724050000	731930000	619390000	612290000	880260000	552320000	777600000	512300000	654710000	669080000	831620000	937190000	1067600000	1094600000	1019100000	1031600000
DNA primase OS=Escherichia coli (strain K12) OX=83333 GN=dnaG PE=1 SV=1	P0ABS5	dnaG	66 kDa	2107300	2363900	17534000	15794000	3137800	8332700	9409400	0	10849000	11387000	9515200	13963000	0	0	0	0	19553000	9486300	4009000	8165400	2565600
DNA polymerase III subunit theta OS=Escherichia coli (strain K12) OX=83333 GN=holE PE=1 SV=1	P0ABS8	holE	9 kDa	11292000	2136200	10925000	6786600	0	4825700	12003000	9244500	8222500	0	0	5918600	5283300	7797800	5536900	4629500	0	7185000	7260700	6152100	6418500
DNA protection during starvation protein OS=Escherichia coli (strain K12) OX=83333 GN=dps PE=1 SV=2	P0ABT2	dps	19 kDa	10606000000	10605000000	10006000000	6185500000	4352600000	3586300000	4764900000	3771400000	4352500000	12492000000	10790000000	15113000000	5340900000	7866800000	6716300000	1839300000	1948900000	2222300000	1827200000	2257300000	1943200000
1,4-dihydroxy-2-naphthoyl-CoA synthase OS=Escherichia coli (strain K12) OX=83333 GN=menB PE=1 SV=1	P0ABU0	menB	32 kDa	349490000	345850000	265180000	596610000	440140000	426410000	127790000	133690000	134380000	426260000	317650000	493820000	64183000	130760000	73783000	214130000	261730000	350590000	359040000	423140000	428530000
Ribosome-binding ATPase YchF OS=Escherichia coli (strain K12) OX=83333 GN=ychF PE=1 SV=2	P0ABU2	ychF	40 kDa	145170000	279730000	162390000	361890000	207190000	137300000	89980000	69052000	87743000	118740000	196570000	168900000	96645000	136960000	94770000	109680000	139610000	196860000	164180000	125990000	142640000
Glyoxalase ElbB OS=Escherichia coli (strain K12) OX=83333 GN=elbB PE=1 SV=1	P0ABU5	elbB	23 kDa	570460000	1053500000	694600000	990870000	843880000	579750000	825380000	908680000	993010000	750950000	638640000	853750000	728630000	1289300000	1041300000	1855100000	1257600000	1974700000	1279200000	1322000000	1576800000
Tol-Pal system protein TolQ OS=Escherichia coli (strain K12) OX=83333 GN=tolQ PE=1 SV=1	P0ABU9	tolQ	26 kDa	0	0	0	0	0	2062800	876720	0	0	3097900	2472000	4323300	0	0	0	2051700	1641500	0	2340400	1516500	1522800
Flavodoxin 2 OS=Escherichia coli (strain K12) OX=83333 GN=fldB PE=1 SV=1	P0ABY4	fldB	20 kDa	184780000	49336000	159140000	129370000	70991000	88690000	76560000	119150000	115830000	71004000	79609000	32430000	96016000	105680000	19989000	29094000	13418000	143700000	93176000	13190000	4319800
3-deoxy-D-manno-octulosonate 8-phosphate phosphatase KdsC OS=Escherichia coli (strain K12) OX=83333 GN=kdsC PE=3 SV=1	P0ABZ4	kdsC	20 kDa	76953000	124300000	240290000	74436000	99464000	56170000	160480000	195800000	173640000	31645000	69314000	59232000	38749000	59159000	41749000	109420000	40003000	114160000	97944000	69073000	89469000
Chaperone SurA OS=Escherichia coli (strain K12) OX=83333 GN=surA PE=1 SV=1	P0ABZ6	surA	47 kDa	426170000	642470000	534210000	229810000	279310000	194950000	532450000	368860000	545080000	429920000	361660000	398000000	541700000	641330000	374630000	425510000	415190000	498320000	341530000	319980000	352060000
Fructoselysine 6-phosphate deglycase OS=Escherichia coli (strain K12) OX=83333 GN=frlB PE=1 SV=1	P0AC00	frlB	39 kDa	14179000	11823000	1966500	0	0	0	0	0	0	0	0	0	11154000	0	836310	9551200	7827900	8853100	4168700	3748100	0
Outer membrane protein assembly factor BamD OS=Escherichia coli (strain K12) OX=83333 GN=bamD PE=1 SV=1	P0AC02	bamD	28 kDa	9074600	7881400	6637600	3496100	3444000	3552700	0	0	4004100	0	0	0	5833700	7988800	4939100	5368700	7908600	9061100	11337000	0	6987800
Dihydropteroate synthase OS=Escherichia coli (strain K12) OX=83333 GN=folP PE=1 SV=1	P0AC13	folP	31 kDa	54491000	49224000	56245000	65239000	75475000	58349000	2739600	12199000	12117000	67785000	70894000	83614000	0	0	3640900	19577000	4883100	23077000	8192500	9587600	17063000
Dihydroneopterin aldolase OS=Escherichia coli (strain K12) OX=83333 GN=folB PE=1 SV=1	P0AC16	folB	14 kDa	8777000	0	139290000	7951000	0	6419500	10215000	11112000	0	0	7850900	90981000	10423000	234060000	10297000	132230000	13212000	203680000	0	0	122050000
Dihydroneopterin triphosphate 2'-epimerase OS=Escherichia coli (strain K12) OX=83333 GN=folX PE=1 SV=2	P0AC19	folX	14 kDa	526590000	496340000	416650000	247660000	169010000	134990000	357300000	328480000	300140000	239740000	199350000	238060000	331230000	468840000	234930000	505170000	556980000	678330000	387450000	530950000	409600000
Formate channel FocA OS=Escherichia coli (strain K12) OX=83333 GN=focA PE=1 SV=1	P0AC23	focA	31 kDa	0	0	0	0	10185000	0	3982100	4685200	5764600	0	12474000	7576100	0	0	0	0	0	0	0	0	0
Fumarate hydratase class I, aerobic OS=Escherichia coli (strain K12) OX=83333 GN=fumA PE=1 SV=2	P0AC33	fumA	60 kDa	591120000	617990000	542930000	416090000	327680000	234550000	104470000	80549000	115290000	241260000	238610000	253120000	1199200000	1804200000	1294200000	2142300000	2115400000	2636600000	1190700000	1555300000	1496200000
Aspartate ammonia-lyase OS=Escherichia coli (strain K12) OX=83333 GN=aspA PE=1 SV=1	P0AC38	aspA	52 kDa	669000000	785360000	555230000	1456400000	1124700000	919660000	882320000	699530000	939740000	1755200000	1408100000	1412900000	1557100000	2526700000	1681600000	2789400000	2737900000	3137200000	2379300000	2882900000	2166500000
Succinate dehydrogenase flavoprotein subunit OS=Escherichia coli (strain K12) OX=83333 GN=sdhA PE=1 SV=1	P0AC41	sdhA	64 kDa	482880000	518100000	427380000	299580000	221620000	189600000	44547000	41844000	49630000	64191000	51991000	78805000	316120000	468890000	339360000	888700000	893740000	1007100000	476610000	346950000	331550000
Succinate dehydrogenase hydrophobic membrane anchor subunit OS=Escherichia coli (strain K12) OX=83333 GN=sdhD PE=1 SV=1	P0AC44	sdhD	13 kDa	13572000	18275000	0	44193000	32808000	27632000	0	0	0	9794800	13211000	9131800	21125000	26080000	21632000	25473000	34659000	51457000	54502000	25849000	20402000
Fumarate reductase iron-sulfur subunit OS=Escherichia coli (strain K12) OX=83333 GN=frdB PE=1 SV=2	P0AC47	frdB	27 kDa	10741000	23117000	8237000	294200000	208490000	176700000	10625000	9628100	20404000	262440000	203180000	248390000	0	3009800	0	48870000	60959000	23021000	100460000	49893000	51437000
Zinc uptake regulation protein OS=Escherichia coli (strain K12) OX=83333 GN=zur PE=1 SV=1	P0AC51	zur	19 kDa	26357000	28885000	27127000	41155000	20971000	27369000	34277000	36698000	48803000	26567000	28353000	36883000	32072000	32834000	26926000	10140000	39052000	27898000	34944000	57169000	67277000
Glucose-6-phosphate 1-dehydrogenase OS=Escherichia coli (strain K12) OX=83333 GN=zwf PE=1 SV=1	P0AC53	zwf	56 kDa	1083800000	1173700000	1060300000	697980000	491920000	465200000	1107900000	1027300000	1272400000	596530000	482560000	544850000	1412600000	1772700000	1034500000	735650000	583170000	866040000	572040000	565580000	609800000
Glutaredoxin 2 OS=Escherichia coli (strain K12) OX=83333 GN=grxB PE=1 SV=1	P0AC59	grxB	24 kDa	625840000	671430000	1427100000	527770000	475430000	306720000	196670000	172760000	145690000	261190000	322220000	382170000	106400000	141830000	274240000	181550000	373280000	325000000	248290000	470090000	477660000
Glutaredoxin 3 OS=Escherichia coli (strain K12) OX=83333 GN=grxC PE=1 SV=2	P0AC62	grxC	9 kDa	554280000	984380000	506710000	589200000	371750000	295710000	203900000	174690000	148780000	236310000	210900000	211000000	140170000	150170000	114010000	187470000	247480000	297600000	184320000	228890000	203050000
Glutaredoxin-like protein NrdH OS=Escherichia coli (strain K12) OX=83333 GN=nrdH PE=1 SV=1	P0AC65	nrdH	9 kDa	180780000	215260000	220960000	0	0	0	0	15432000	19026000	0	0	0	16032000	24933000	21883000	0	0	0	0	0	0
Glutaredoxin 4 OS=Escherichia coli (strain K12) OX=83333 GN=grxD PE=1 SV=1	P0AC69	grxD	13 kDa	1653500000	2388200000	1060600000	1323500000	998860000	891640000	1428300000	1685400000	1768300000	845320000	316720000	914100000	848800000	1401300000	894100000	821610000	1003100000	1039200000	898130000	907660000	673000000
Evolved beta-galactosidase subunit beta OS=Escherichia coli (strain K12) OX=83333 GN=ebgC PE=1 SV=1	P0AC73	ebgC	17 kDa	0	0	0	0	8055500	6887300	0	0	0	9140000	9739100	9843500	0	0	0	2616500	0	0	0	0	4128200
Lactoylglutathione lyase OS=Escherichia coli (strain K12) OX=83333 GN=gloA PE=1 SV=1	P0AC81	gloA	15 kDa	602760000	689010000	742180000	521760000	350710000	305620000	522810000	464100000	498740000	363440000	229300000	335360000	495630000	490910000	431830000	301430000	306980000	314560000	245510000	243570000	194430000
Hydroxyacylglutathione hydrolase GloB OS=Escherichia coli (strain K12) OX=83333 GN=gloB PE=1 SV=1	P0AC84	gloB	28 kDa	5440600	20155000	8263900	87587000	56780000	55543000	12885000	12002000	18651000	38548000	34904000	32746000	6462700	7903400	11245000	9269700	28183000	40990000	76513000	53187000	65972000
Glycogen phosphorylase OS=Escherichia coli (strain K12) OX=83333 GN=glgP PE=3 SV=1	P0AC86	glgP	93 kDa	148130000	165980000	157810000	139830000	89614000	86105000	78355000	55747000	69707000	97096000	66156000	54781000	63084000	106340000	72401000	126480000	92125000	124110000	107970000	87126000	124360000
Protein GnsA OS=Escherichia coli (strain K12) OX=83333 GN=gnsA PE=1 SV=1	P0AC92	gnsA	7 kDa	333660000	349280000	289890000	376440000	202030000	198420000	408960000	335910000	300100000	339990000	262700000	309380000	231470000	373310000	256810000	74022000	310840000	460540000	65499000	294370000	266540000
Uncharacterized GST-like protein YibF OS=Escherichia coli (strain K12) OX=83333 GN=yibF PE=1 SV=1	P0ACA1	yibF	23 kDa	146950000	153800000	129910000	70413000	48854000	39580000	28673000	30303000	28530000	27929000	18446000	11557000	4935700	7403100	22865000	26626000	24496000	25506000	23906000	21242000	18655000
Stringent starvation protein A OS=Escherichia coli (strain K12) OX=83333 GN=sspA PE=1 SV=2	P0ACA3	sspA	24 kDa	645350000	861770000	735570000	582880000	558250000	516980000	549970000	559380000	713650000	525430000	752630000	545080000	625840000	808860000	567670000	645110000	628140000	785270000	649390000	643120000	518000000
Glutathione S-transferase GstB OS=Escherichia coli (strain K12) OX=83333 GN=gstB PE=1 SV=1	P0ACA7	gstB	24 kDa	194250000	219390000	196650000	159280000	122910000	99752000	135710000	108760000	118850000	128320000	123370000	142320000	62652000	83673000	53941000	147550000	185220000	199000000	188170000	183190000	166880000
Replicative DNA helicase OS=Escherichia coli (strain K12) OX=83333 GN=dnaB PE=1 SV=1	P0ACB0	dnaB	52 kDa	0	5229200	0	30474000	30196000	30508000	0	0	1656300	34047000	20038000	39621000	0	0	0	21828000	24498000	49856000	26151000	23217000	17549000
Delta-aminolevulinic acid dehydratase OS=Escherichia coli (strain K12) OX=83333 GN=hemB PE=1 SV=2	P0ACB2	hemB	36 kDa	822530000	920630000	876640000	409710000	272660000	227870000	565270000	474250000	570230000	277750000	266220000	279630000	780080000	1039200000	807090000	573270000	441100000	587190000	425180000	472930000	304430000
Protoporphyrinogen IX dehydrogenase [quinone] OS=Escherichia coli (strain K12) OX=83333 GN=hemG PE=1 SV=1	P0ACB4	hemG	21 kDa	14441000	22893000	9175200	8007500	19078000	20980000	0	0	9154900	14702000	18562000	10424000	5398300	20638000	15551000	23985000	17725000	25289000	15123000	16974000	7246100
Protein HemY OS=Escherichia coli (strain K12) OX=83333 GN=hemY PE=1 SV=1	P0ACB7	hemY	45 kDa	27503000	38250000	12081000	0	21243000	16136000	7017300	2246200	0	7741700	10370000	29891000	8212700	7685600	15928000	25391000	19269000	17251000	26223000	21246000	25891000
Iron-sulfur cluster insertion protein ErpA OS=Escherichia coli (strain K12) OX=83333 GN=erpA PE=1 SV=1	P0ACC3	erpA	12 kDa	993230000	1053500000	1065800000	344040000	235350000	254570000	956980000	835250000	984120000	261220000	227490000	245180000	900720000	1487100000	989140000	297160000	298180000	453720000	235800000	264050000	217210000
Bifunctional protein GlmU OS=Escherichia coli (strain K12) OX=83333 GN=glmU PE=1 SV=1	P0ACC7	glmU	49 kDa	185470000	187150000	187500000	261340000	234520000	170100000	149830000	121040000	132460000	195820000	158750000	223460000	90451000	127910000	95675000	184000000	183300000	214840000	212010000	200000000	190410000
Iron-sulfur cluster assembly scaffold protein IscU OS=Escherichia coli (strain K12) OX=83333 GN=iscU PE=1 SV=1	P0ACD4	iscU	14 kDa	6758600000	6533300000	7182700000	384170000	448230000	410570000	6953600000	6302900000	6053500000	696240000	632080000	529030000	6991100000	7221100000	6510000000	358040000	355640000	423990000	290890000	304190000	267570000
Hydrogenase-1 large chain OS=Escherichia coli (strain K12) OX=83333 GN=hyaB PE=1 SV=1	P0ACD8	hyaB	66 kDa	2612500	3522600	0	140210000	88749000	51649000	0	0	0	120390000	98289000	90497000	0	0	0	0	0	0	0	0	10953000
Hydrogenase-2 large chain OS=Escherichia coli (strain K12) OX=83333 GN=hybC PE=1 SV=2	P0ACE0	hybC	62 kDa	14252000	31692000	5343500	139140000	110470000	108040000	17751000	13741000	9690600	187890000	134230000	146700000	17138000	30987000	24440000	324280000	318900000	421240000	572030000	486400000	451750000
Purine nucleoside phosphoramidase OS=Escherichia coli (strain K12) OX=83333 GN=hinT PE=1 SV=1	P0ACE7	hinT	13 kDa	443630000	424290000	393410000	483070000	316340000	319070000	308180000	231060000	312260000	278720000	381130000	229190000	210980000	409040000	192760000	255840000	237250000	421450000	238010000	269090000	227440000
DNA-binding protein HU-alpha OS=Escherichia coli (strain K12) OX=83333 GN=hupA PE=1 SV=1	P0ACF0	hupA	10 kDa	12024000000	19969000000	12069000000	17636000000	10952000000	7207600000	13532000000	10332000000	5995800000	5028000000	11115000000	6885200000	25774000000	28207000000	18897000000	13327000000	23701000000	15316000000	23469000000	19612000000	5412800000
DNA-binding protein HU-beta OS=Escherichia coli (strain K12) OX=83333 GN=hupB PE=1 SV=1	P0ACF4	hupB	9 kDa	1784400000	5895400000	3936700000	2581300000	2072400000	1795200000	3532900000	3406600000	3881700000	7221100000	4778200000	4618100000	4148500000	7511300000	2274400000	8911800000	6195900000	7410800000	8203000000	2808700000	4265100000
DNA-binding protein H-NS OS=Escherichia coli (strain K12) OX=83333 GN=hns PE=1 SV=2	P0ACF8	hns	16 kDa	4909200000	7195000000	5110200000	5881500000	4716700000	3554700000	3982000000	2136800000	3026600000	4731600000	3507800000	4813200000	3389600000	6017400000	2719800000	7735100000	6012500000	11495000000	7110500000	5695700000	4831800000
DNA-binding protein StpA OS=Escherichia coli (strain K12) OX=83333 GN=stpA PE=1 SV=1	P0ACG1	stpA	15 kDa	598060000	704650000	572260000	1020600000	703380000	556500000	697670000	547850000	689780000	614110000	554690000	704010000	439630000	658150000	470120000	422950000	540860000	549890000	386800000	413010000	316990000
Heat shock protein 15 OS=Escherichia coli (strain K12) OX=83333 GN=hslR PE=1 SV=1	P0ACG8	hslR	15 kDa	17101000	35173000	22666000	18849000	0	8198400	9970200	11904000	13348000	0	0	8100800	0	12681000	7920900	0	18666000	18512000	8632700	0	5269300
Right origin-binding protein OS=Escherichia coli (strain K12) OX=83333 GN=rob PE=1 SV=1	P0ACI0	rob	33 kDa	168860000	186560000	173220000	303750000	205090000	152280000	111670000	81755000	87823000	173580000	170290000	150980000	69279000	54512000	71478000	162220000	139920000	185190000	148370000	131740000	134360000
Xylose operon regulatory protein OS=Escherichia coli (strain K12) OX=83333 GN=xylR PE=1 SV=1	P0ACI3	xylR	45 kDa	0	0	0	0	0	0	0	0	0	0	0	0	0	0	0	0	5593200	7459500	0	5163700	10570000
Leucine-responsive regulatory protein OS=Escherichia coli (strain K12) OX=83333 GN=lrp PE=1 SV=2	P0ACJ0	lrp	19 kDa	327080000	381740000	354600000	252230000	142830000	132800000	283570000	237960000	335380000	300000000	257340000	286690000	390800000	506620000	380220000	412080000	498750000	641500000	422130000	421530000	346990000
DNA-binding transcriptional dual regulator CRP OS=Escherichia coli (strain K12) OX=83333 GN=crp PE=1 SV=1	P0ACJ8	crp	24 kDa	495960000	463150000	370830000	1202600000	857850000	726030000	136800000	77572000	113730000	661720000	684890000	800550000	118690000	186330000	135710000	574400000	559560000	844280000	526340000	604420000	774280000
Putative aga operon transcriptional repressor OS=Escherichia coli (strain K12) OX=83333 GN=agaR PE=4 SV=1	P0ACK2	agaR	30 kDa	7444800	25207000	6261400	34692000	14367000	9998600	32134000	26120000	32908000	26750000	24176000	23858000	10694000	25108000	27803000	30505000	24406000	25961000	27404000	14930000	16837000
Deoxyribose operon repressor OS=Escherichia coli (strain K12) OX=83333 GN=deoR PE=1 SV=1	P0ACK5	deoR	29 kDa	0	0	0	10831000	9425500	12145000	0	4852100	0	18721000	23386000	32601000	0	0	0	15328000	14877000	0	45051000	34476000	26115000
L-fucose operon activator OS=Escherichia coli (strain K12) OX=83333 GN=fucR PE=4 SV=1	P0ACK8	fucR	27 kDa	0	0	0	0	0	0	0	0	0	13247000	14981000	14800000	0	0	0	29999000	34798000	40448000	40278000	26769000	24366000
Glycerol-3-phosphate regulon repressor OS=Escherichia coli (strain K12) OX=83333 GN=glpR PE=1 SV=1	P0ACL0	glpR	28 kDa	18215000	21663000	20295000	52595000	21764000	0	0	0	0	2807400	0	0	10778000	0	0	0	0	0	5128400	0	3172700
Exu regulon transcriptional regulator OS=Escherichia coli (strain K12) OX=83333 GN=exuR PE=4 SV=1	P0ACL2	exuR	30 kDa	29986000	19809000	25654000	54720000	24949000	29183000	10904000	3836500	3556600	26807000	32813000	26335000	0	6677100	19471000	55417000	29015000	39687000	26830000	35251000	27286000
Glc operon transcriptional activator OS=Escherichia coli (strain K12) OX=83333 GN=glcC PE=1 SV=1	P0ACL5	glcC	29 kDa	0	0	0	4931800	3603400	0	0	0	0	0	0	0	0	0	0	8194400	2093800	4024100	0	6192000	10510000
Pyruvate dehydrogenase complex repressor OS=Escherichia coli (strain K12) OX=83333 GN=pdhR PE=1 SV=1	P0ACL9	pdhR	29 kDa	26744000	49257000	25230000	20047000	14297000	9900100	24267000	0	18950000	10918000	10380000	12701000	32348000	44413000	27443000	35124000	24236000	39736000	24061000	19396000	14053000
HTH-type transcriptional repressor RspR OS=Escherichia coli (strain K12) OX=83333 GN=rspR PE=1 SV=1	P0ACM2	rspR	27 kDa	0	0	0	10014000	17176000	16334000	1356900	0	1376100	10688000	23935000	17206000	0	0	0	20124000	17638000	11942000	25885000	20499000	10083000
Uncharacterized HTH-type transcriptional regulator YegW OS=Escherichia coli (strain K12) OX=83333 GN=yegW PE=4 SV=1	P0ACM5	yegW	28 kDa	0	0	0	13796000	6537900	0	0	0	0	0	4484000	11408000	0	0	0	0	0	0	4406700	3733500	2991600
Uncharacterized HTH-type transcriptional regulator YihL OS=Escherichia coli (strain K12) OX=83333 GN=yihL PE=4 SV=1	P0ACM9	yihL	27 kDa	0	0	0	4064300	0	109000000	0	0	0	0	0	0	0	0	0	3655300	3239900	0	3800400	5160600	0
HTH-type transcriptional repressor AllR OS=Escherichia coli (strain K12) OX=83333 GN=allR PE=1 SV=1	P0ACN4	allR	29 kDa	121850000	89820000	114040000	64770000	114230000	130810000	80382000	52646000	51485000	141520000	107160000	53313000	34409000	55226000	39100000	170610000	47350000	57990000	48164000	122300000	39517000
HTH-type transcriptional repressor CytR OS=Escherichia coli (strain K12) OX=83333 GN=cytR PE=1 SV=1	P0ACN7	cytR	38 kDa	0	0	0	0	0	0	0	0	0	0	0	0	2895400	0	0	10060000	10181000	13142000	9222100	8923800	9858000
Catabolite repressor/activator OS=Escherichia coli (strain K12) OX=83333 GN=cra PE=1 SV=1	P0ACP1	cra	38 kDa	20429000	21008000	26098000	233870000	86004000	97994000	14316000	9826900	16173000	184710000	162310000	202770000	5280800	7613300	7909500	131820000	59636000	158460000	170290000	30966000	215390000
HTH-type transcriptional regulator GntR OS=Escherichia coli (strain K12) OX=83333 GN=gntR PE=1 SV=1	P0ACP5	gntR	36 kDa	88304000	93716000	94236000	98268000	27171000	68253000	48130000	55420000	50435000	22657000	70935000	92330000	72895000	102490000	3809600	19873000	96637000	84946000	22758000	82618000	13301000
HTH-type transcriptional repressor PurR OS=Escherichia coli (strain K12) OX=83333 GN=purR PE=1 SV=2	P0ACP7	purR	38 kDa	84878000	93760000	79044000	147890000	92006000	102560000	95225000	116120000	114300000	160940000	119490000	155360000	93331000	114500000	52162000	118910000	137010000	156060000	156160000	118440000	95366000
Hydrogen peroxide-inducible genes activator OS=Escherichia coli (strain K12) OX=83333 GN=oxyR PE=1 SV=1	P0ACQ4	oxyR	34 kDa	161430000	193400000	120570000	157150000	71646000	78836000	194190000	237040000	290590000	234280000	138630000	137430000	98769000	108670000	82837000	124030000	274580000	169000000	207310000	167650000	93162000
Uncharacterized HTH-type transcriptional regulator YeiE OS=Escherichia coli (strain K12) OX=83333 GN=yeiE PE=3 SV=1	P0ACR4	yeiE	33 kDa	0	0	0	3107200	0	2236700	0	0	0	10920000	11325000	2027000	0	0	0	0	0	0	0	0	0
Transcriptional repressor MprA OS=Escherichia coli (strain K12) OX=83333 GN=mprA PE=2 SV=1	P0ACR9	mprA	21 kDa	4661300	98699000	4473300	109970000	125300000	146790000	49738000	30574000	37486000	99492000	158130000	167450000	45417000	10897000	26869000	206910000	168390000	206540000	70701000	165760000	156400000
HTH-type transcriptional regulator ZntR OS=Escherichia coli (strain K12) OX=83333 GN=zntR PE=1 SV=1	P0ACS5	zntR	16 kDa	28959000	11116000	6326200	0	0	1876100	20184000	33379000	24206000	0	4999700	0	0	3435500	0	12388000	5312400	5713400	4413300	9712800	3249600
HTH-type transcriptional regulator RpiR OS=Escherichia coli (strain K12) OX=83333 GN=rpiR PE=1 SV=1	P0ACS7	rpiR	32 kDa	0	0	0	9306100	7413500	0	0	0	0	16732000	3121000	9230400	0	0	0	13802000	12070000	19489000	16258000	17078000	13531000
HTH-type transcriptional regulator UidR OS=Escherichia coli (strain K12) OX=83333 GN=uidR PE=1 SV=1	P0ACT6	uidR	22 kDa	0	0	0	12202000	10698000	3181900	0	0	0	13017000	8999500	4975400	0	0	0	9542200	4791100	18373000	9959700	3844600	4054800
HTH-type transcriptional dual regulator CecR OS=Escherichia coli (strain K12) OX=83333 GN=cecR PE=1 SV=1	P0ACU0	cecR	25 kDa	0	0	0	0	0	3284500	0	0	0	0	0	1347400	0	0	0	0	0	0	0	0	0
HTH-type transcriptional regulator RutR OS=Escherichia coli (strain K12) OX=83333 GN=rutR PE=1 SV=1	P0ACU2	rutR	24 kDa	7029000	4207800	0	2908600	3410400	0	3576300	0	0	0	4310900	0	7668000	0	0	0	4330200	8971200	0	4108600	0
HTH-type transcriptional repressor FabR OS=Escherichia coli (strain K12) OX=83333 GN=fabR PE=1 SV=2	P0ACU5	fabR	27 kDa	59870000	65186000	82343000	21174000	16864000	23658000	76179000	73076000	92204000	48466000	9698700	82247000	32560000	21319000	30478000	73910000	25331000	160720000	23643000	16209000	36243000
HTH-type transcriptional regulator YjdC OS=Escherichia coli (strain K12) OX=83333 GN=yjdC PE=4 SV=1	P0ACU7	yjdC	22 kDa	43593000	433500000	69532000	154440000	53350000	58434000	36620000	25875000	46576000	39946000	65661000	57431000	0	0	2064400	24679000	18863000	10613000	46755000	41005000	31274000
Uncharacterized protein YmjA OS=Escherichia coli (strain K12) OX=83333 GN=ymjA PE=4 SV=1	P0ACV8	ymjA	9 kDa	0	0	0	0	0	0	5079200	2348200	9711700	0	0	0	0	0	0	0	5207100	0	0	0	0
Uncharacterized protein YdcH OS=Escherichia coli (strain K12) OX=83333 GN=ydcH PE=4 SV=2	P0ACW6	ydcH	9 kDa	290860000	10401000	65739000	194420000	5908200	0	8887400	0	233330000	1143000000	4055200	4685300	327810000	309870000	261720000	210830000	0	0	143850000	0	149730000
Putative monooxygenase YdhR OS=Escherichia coli (strain K12) OX=83333 GN=ydhR PE=1 SV=1	P0ACX3	ydhR	11 kDa	833710000	925690000	901620000	552460000	377340000	332570000	940920000	807550000	811410000	497910000	440650000	538400000	748370000	811220000	613610000	484960000	591080000	786840000	430410000	613050000	459110000
Putative NAD(P)H nitroreductase YdjA OS=Escherichia coli (strain K12) OX=83333 GN=ydjA PE=1 SV=1	P0ACY1	ydjA	20 kDa	309300000	357260000	369030000	354480000	274060000	193850000	448890000	414110000	461090000	301670000	230230000	321860000	349520000	514230000	340940000	575700000	566150000	863950000	590330000	562550000	497560000
Uncharacterized protein YeaG OS=Escherichia coli (strain K12) OX=83333 GN=yeaG PE=3 SV=1	P0ACY3	yeaG	74 kDa	257990000	359610000	365280000	514740000	406150000	382340000	42202000	27509000	28138000	92794000	104890000	108880000	0	0	0	0	0	0	0	0	0
Uncharacterized protein YebG OS=Escherichia coli (strain K12) OX=83333 GN=yebG PE=4 SV=1	P0ACY9	yebG	11 kDa	97643000	192750000	120940000	75985000	33685000	31166000	16706000	11377000	13028000	20880000	10863000	13974000	30736000	41140000	32419000	18707000	10315000	29624000	8986000	10474000	10733000
DNA-binding transcriptional activator EvgA OS=Escherichia coli (strain K12) OX=83333 GN=evgA PE=1 SV=1	P0ACZ4	evgA	23 kDa	3193100	8663400	23794000	71955000	13121000	11465000	0	0	0	12203000	21356000	0	0	0	0	38767000	20611000	16640000	24234000	11244000	0
Transcriptional regulatory protein DcuR OS=Escherichia coli (strain K12) OX=83333 GN=dcuR PE=1 SV=1	P0AD01	dcuR	27 kDa	0	0	0	16860000	12981000	9740100	0	0	0	12800000	14267000	0	0	0	0	7830700	7017500	9902900	24254000	8348900	22242000
Uncharacterized protein YecA OS=Escherichia coli (strain K12) OX=83333 GN=yecA PE=4 SV=1	P0AD05	yecA	25 kDa	75147000	49884000	57157000	92434000	48277000	36696000	58318000	7292600	44182000	51863000	71224000	96931000	23235000	44960000	47081000	83339000	174030000	138740000	121380000	89554000	130430000
Uncharacterized protein YecF OS=Escherichia coli (strain K12) OX=83333 GN=yecF PE=4 SV=1	P0AD07	yecF	8 kDa	0	0	0	24479000	14641000	17125000	0	14561000	14084000	20658000	17679000	30332000	10223000	39478000	9729800	27127000	17792000	39246000	16179000	12239000	11918000
Uncharacterized protein YecJ OS=Escherichia coli (strain K12) OX=83333 GN=yecJ PE=4 SV=1	P0AD10	yecJ	9 kDa	10863000	13453000	29329000	20968000	14377000	10284000	8286200	9371100	11203000	9266200	12130000	42132000	0	0	0	14493000	0	17192000	0	11979000	0
Protein YeeZ OS=Escherichia coli (strain K12) OX=83333 GN=yeeZ PE=1 SV=1	P0AD12	yeeZ	30 kDa	100890000	114720000	107520000	125230000	95632000	73788000	93355000	78299000	83221000	94305000	81585000	92170000	67481000	87179000	57029000	63304000	69691000	100560000	47887000	49471000	56495000
UPF0352 protein YejL OS=Escherichia coli (strain K12) OX=83333 GN=yejL PE=1 SV=1	P0AD24	yejL	8 kDa	63771000	80184000	89402000	55259000	53899000	59191000	88600000	60790000	97297000	58137000	56444000	41504000	62905000	53655000	70943000	55967000	62173000	63909000	55425000	35612000	71192000
UPF0381 protein YfcZ OS=Escherichia coli (strain K12) OX=83333 GN=yfcZ PE=3 SV=1	P0AD33	yfcZ	10 kDa	670360000	853790000	606240000	1738900000	1096500000	1219900000	661600000	522650000	593240000	1444900000	1548400000	1401700000	405730000	651440000	468620000	714230000	630680000	693300000	364130000	482890000	439040000
Ribosome-associated inhibitor A OS=Escherichia coli (strain K12) OX=83333 GN=raiA PE=1 SV=2	P0AD49	raiA	13 kDa	987500000	1167700000	1033100000	3864900000	2017500000	1581600000	770360000	750720000	758770000	2409800000	2119800000	2398600000	2646200000	3899900000	3485300000	615640000	720920000	6568300000	638190000	887790000	4238500000
Octaprenyl diphosphate synthase OS=Escherichia coli (strain K12) OX=83333 GN=ispB PE=1 SV=1	P0AD57	ispB	35 kDa	81441000	114310000	110120000	237650000	206280000	146770000	78460000	32765000	73675000	87946000	126630000	74389000	37635000	77449000	53471000	110080000	71126000	107180000	103180000	61950000	57283000
Inhibitor of vertebrate lysozyme OS=Escherichia coli (strain K12) OX=83333 GN=ivy PE=1 SV=1	P0AD59	ivy	17 kDa	361270000	504410000	341700000	227630000	197400000	153690000	122310000	110910000	30481000	180670000	92223000	151410000	225860000	343930000	150420000	208080000	258200000	256680000	170650000	239220000	179340000
Pyruvate kinase I OS=Escherichia coli (strain K12) OX=83333 GN=pykF PE=1 SV=1	P0AD61	pykF	51 kDa	4793400000	6579200000	6004400000	4890000000	3965300000	2700700000	4306900000	3432800000	4461000000	1966200000	1625000000	2306900000	2463700000	4046000000	3425000000	2179700000	2287500000	2390200000	2259000000	1999600000	2443400000
Leu/Ile/Val-binding protein OS=Escherichia coli (strain K12) OX=83333 GN=livJ PE=1 SV=1	P0AD96	livJ	39 kDa	4253600	5263900	4887900	0	0	2671400	0	4332000	0	0	0	0	22082000	30966000	8810800	3495500	5938000	15084000	0	0	8468400
Thioesterase 1/protease 1/lysophospholipase L1 OS=Escherichia coli (strain K12) OX=83333 GN=tesA PE=1 SV=1	P0ADA1	tesA	24 kDa	38841000	31597000	39113000	19001000	13070000	15756000	18926000	30027000	33850000	1960400	5402000	3878800	12671000	17179000	19469000	20706000	22613000	34334000	29790000	9995600	10019000
Murein hydrolase activator NlpD OS=Escherichia coli (strain K12) OX=83333 GN=nlpD PE=1 SV=1	P0ADA3	nlpD	40 kDa	215940000	248280000	197200000	108440000	80989000	60047000	152570000	123490000	149850000	97902000	93620000	97403000	136100000	211890000	136450000	109470000	110110000	117460000	104180000	110540000	97431000
Uncharacterized lipoprotein YajG OS=Escherichia coli (strain K12) OX=83333 GN=yajG PE=3 SV=1	P0ADA5	yajG	21 kDa	17313000	16997000	15072000	30896000	25596000	13453000	13466000	9997500	26916000	16497000	10887000	0	9182600	20633000	0	148770000	22273000	21144000	25189000	150070000	12206000
Osmotically-inducible putative lipoprotein OsmE OS=Escherichia coli (strain K12) OX=83333 GN=osmE PE=2 SV=1	P0ADB1	osmE	12 kDa	79614000	102230000	59145000	489250000	324260000	248670000	45857000	46374000	41191000	114560000	86778000	119430000	0	0	3145100	0	4608300	0	13925000	5461700	0
Potassium binding protein Kbp OS=Escherichia coli (strain K12) OX=83333 GN=kbp PE=1 SV=2	P0ADE6	kbp	16 kDa	18787000	23261000	37799000	138850000	117200000	110940000	17007000	8496700	6030700	15372000	10058000	15637000	0	0	0	0	0	0	0	0	0
tRNA-modifying protein YgfZ OS=Escherichia coli (strain K12) OX=83333 GN=ygfZ PE=1 SV=2	P0ADE8	ygfZ	36 kDa	1505900000	1708700000	1441500000	944210000	765930000	640320000	1127200000	1094900000	1322700000	625160000	557720000	723060000	1233000000	1526700000	1193700000	787220000	1036800000	1156400000	865980000	1020100000	841580000
Phosphogluconate dehydratase OS=Escherichia coli (strain K12) OX=83333 GN=edd PE=1 SV=1	P0ADF6	edd	65 kDa	57395000	43176000	52865000	51529000	57766000	25374000	34298000	24114000	35668000	0	9951400	2888900	12979000	25123000	24300000	21888000	4556300	20998000	28209000	9882200	10446000
Acetolactate synthase isozyme 1 small subunit OS=Escherichia coli (strain K12) OX=83333 GN=ilvN PE=1 SV=1	P0ADF8	ilvN	11 kDa	0	28261000	0	26854000	37045000	0	0	0	0	15987000	0	16595000	0	0	0	0	49978000	0	24096000	18301000	16238000
Nus factor SuhB OS=Escherichia coli (strain K12) OX=83333 GN=suhB PE=1 SV=1	P0ADG4	suhB	29 kDa	450550000	501440000	413060000	598680000	531320000	397880000	371940000	366910000	398120000	566640000	450330000	516030000	368840000	475350000	316240000	374330000	436950000	673030000	529590000	425320000	408840000
Inosine-5'-monophosphate dehydrogenase OS=Escherichia coli (strain K12) OX=83333 GN=guaB PE=1 SV=1	P0ADG7	guaB	52 kDa	502690000	807520000	313020000	1090500000	490120000	853740000	203300000	134390000	207920000	419220000	369730000	687900000	170120000	188450000	141890000	371860000	275820000	434330000	494840000	472230000	404410000
Enterobactin synthase component B OS=Escherichia coli (strain K12) OX=83333 GN=entB PE=1 SV=1	P0ADI4	entB	33 kDa	532060000	21174000	9196500	0	288930000	1329600	0	110820000	162230000	0	657160000	0	0	0	0	129140000	0	227450000	74811000	0	0
Isochorismatase family protein YecD OS=Escherichia coli (strain K12) OX=83333 GN=yecD PE=1 SV=2	P0ADI7	yecD	20 kDa	64138000	97248000	91637000	219120000	188810000	64695000	73158000	35355000	72369000	86994000	68097000	24977000	52459000	118590000	48711000	74260000	89741000	71597000	97915000	72085000	142580000
Uncharacterized protein YiaF OS=Escherichia coli (strain K12) OX=83333 GN=yiaF PE=4 SV=2	P0ADK0	yiaF	26 kDa	0	0	0	18548000	20937000	10353000	0	0	7801700	0	0	19122000	10225000	0	0	0	0	0	0	0	0
Uncharacterized protein YibL OS=Escherichia coli (strain K12) OX=83333 GN=yibL PE=1 SV=1	P0ADK8	yibL	14 kDa	201050000	229470000	211160000	144900000	114370000	85548000	128100000	134380000	126010000	79146000	89989000	76591000	136040000	182940000	136010000	113620000	107210000	172600000	93868000	96581000	84444000
UPF0438 protein YifE OS=Escherichia coli (strain K12) OX=83333 GN=yifE PE=1 SV=2	P0ADN2	yifE	13 kDa	1126800000	1144100000	1308300000	779350000	730950000	618150000	744530000	753670000	770500000	399270000	392320000	452820000	1171500000	1402300000	1100900000	850620000	912380000	1045600000	947740000	888610000	859430000
5-amino-6-(5-phospho-D-ribitylamino)uracil phosphatase YigB OS=Escherichia coli (strain K12) OX=83333 GN=yigB PE=1 SV=1	P0ADP0	yigB	27 kDa	11286000	12299000	34351000	47409000	40565000	29666000	7235900	10720000	6727100	15578000	8945600	29092000	23230000	17639000	6161800	26383000	24655000	57192000	33231000	40524000	32325000
Medium/long-chain acyl-CoA thioesterase YigI OS=Escherichia coli (strain K12) OX=83333 GN=yigI PE=1 SV=1	P0ADP2	yigI	17 kDa	12753000	46341000	29318000	49578000	26484000	4510500	0	0	0	0	0	0	2113800	7850100	0	32206000	61327000	53371000	7923900	32819000	5631900
Ubiquinone biosynthesis accessory factor UbiJ OS=Escherichia coli (strain K12) OX=83333 GN=ubiJ PE=1 SV=1	P0ADP7	ubiJ	22 kDa	4714300	18638000	3620600	8751200	6000900	0	0	0	0	0	0	0	5594400	0	0	7242100	0	7532300	0	0	0
Protein YihD OS=Escherichia coli (strain K12) OX=83333 GN=yihD PE=1 SV=1	P0ADP9	yihD	10 kDa	208570000	138340000	192010000	335910000	210740000	259370000	204860000	185570000	180500000	388650000	333750000	249350000	256390000	223050000	146770000	416980000	340370000	563530000	411590000	411180000	351390000
Probable acyltransferase FabY OS=Escherichia coli (strain K12) OX=83333 GN=fabY PE=2 SV=1	P0ADQ2	fabY	37 kDa	39454000	54224000	35213000	69976000	59057000	40289000	2889800	0	0	47829000	37115000	41068000	9197700	7647800	7049200	33749000	42786000	58421000	38583000	18400000	27295000
Uncharacterized protein YgaM OS=Escherichia coli (strain K12) OX=83333 GN=ygaM PE=1 SV=2	P0ADQ7	ygaM	12 kDa	92974000	130450000	73495000	46047000	0	36699000	25164000	19234000	0	0	0	0	0	0	0	0	0	0	0	0	0
Ribosomal RNA large subunit methyltransferase M OS=Escherichia coli (strain K12) OX=83333 GN=rlmM PE=1 SV=1	P0ADR6	rlmM	42 kDa	43697000	43222000	43799000	77502000	52894000	40685000	47457000	39392000	43663000	59746000	52730000	62851000	41868000	56488000	39514000	33968000	38881000	66227000	22584000	22319000	53820000
Pyrimidine/purine nucleotide 5'-monophosphate nucleosidase OS=Escherichia coli (strain K12) OX=83333 GN=ppnN PE=1 SV=1	P0ADR8	ppnN	51 kDa	84483000	91702000	65980000	277970000	189550000	203560000	58280000	48439000	57402000	169450000	160980000	189060000	13627000	15387000	16227000	112890000	154330000	184660000	198690000	168520000	177600000
Cell division protein ZapA OS=Escherichia coli (strain K12) OX=83333 GN=zapA PE=1 SV=1	P0ADS2	zapA	13 kDa	120780000	114280000	85588000	115780000	70223000	73155000	70519000	85487000	70786000	82132000	63918000	74888000	73729000	109930000	71114000	111760000	81569000	117480000	65472000	102450000	63928000
Uncharacterized protein YggE OS=Escherichia coli (strain K12) OX=83333 GN=yggE PE=4 SV=1	P0ADS6	yggE	27 kDa	881940000	1034900000	800130000	495200000	382010000	284190000	405540000	356880000	426210000	265480000	211260000	233310000	242020000	475200000	248300000	262450000	338350000	126570000	160040000	189500000	257120000
Uncharacterized protein YggN OS=Escherichia coli (strain K12) OX=83333 GN=yggN PE=4 SV=1	P0ADS9	yggN	26 kDa	79970000	74587000	54280000	54146000	51216000	41302000	65078000	53837000	49341000	47950000	38258000	51831000	39549000	47187000	23393000	34978000	38025000	46467000	47314000	46350000	41197000
UPF0441 protein YgiB OS=Escherichia coli (strain K12) OX=83333 GN=ygiB PE=3 SV=2	P0ADT2	ygiB	23 kDa	1051300	6643000	0	10176000	9364800	8144800	0	1615700	0	0	1479100	5539000	1296300	1558800	1830300	1893000	725150	3605700	7798400	0	4893800
Putative acid--amine ligase YgiC OS=Escherichia coli (strain K12) OX=83333 GN=ygiC PE=1 SV=1	P0ADT5	ygiC	45 kDa	77410000	90753000	95248000	172500000	114350000	109900000	63821000	38974000	64841000	121340000	78859000	106250000	11210000	106390000	23734000	145650000	121830000	181740000	117440000	134300000	115480000
Uncharacterized protein YgiM OS=Escherichia coli (strain K12) OX=83333 GN=ygiM PE=3 SV=1	P0ADT8	ygiM	23 kDa	0	0	0	0	5639700	0	0	0	0	3771000	0	12864000	0	11514000	3037600	0	0	7953900	4966000	0	0
Probable quinol monooxygenase YgiN OS=Escherichia coli (strain K12) OX=83333 GN=ygiN PE=1 SV=1	P0ADU2	ygiN	12 kDa	439800000	268200000	234730000	505240000	339360000	280120000	478270000	423070000	450400000	505590000	379860000	472680000	327500000	496420000	208130000	124240000	302310000	486700000	427390000	374610000	321060000
Protein YgiW OS=Escherichia coli (strain K12) OX=83333 GN=ygiW PE=1 SV=1	P0ADU5	ygiW	14 kDa	1878300000	1552900000	1504800000	1696000000	1170200000	1032900000	409920000	320560000	382270000	487280000	406900000	513490000	56511000	75433000	58959000	80332000	92038000	109130000	100840000	101860000	97893000
Lipopolysaccharide export system protein LptA OS=Escherichia coli (strain K12) OX=83333 GN=lptA PE=1 SV=1	P0ADV1	lptA	20 kDa	77413000	77343000	76820000	31390000	21897000	28118000	114500000	121120000	77691000	28586000	54140000	48526000	52260000	67323000	46619000	35144000	42382000	45607000	64197000	24115000	43735000
Luciferase-like monooxygenase OS=Escherichia coli (strain K12) OX=83333 GN=yhbW PE=4 SV=1	P0ADV5	yhbW	37 kDa	811450000	931930000	648290000	191150000	140600000	134310000	82094000	104810000	70192000	11711000	0	12008000	530790000	701160000	419910000	57454000	72263000	44483000	18761000	8398900	15707000
Intermembrane phospholipid transport system binding protein MlaC OS=Escherichia coli (strain K12) OX=83333 GN=mlaC PE=1 SV=1	P0ADV7	mlaC	24 kDa	711420000	786450000	694130000	571310000	461070000	499870000	635330000	572240000	626130000	544610000	474090000	310710000	583050000	718980000	553250000	235000000	377550000	602960000	331670000	595250000	339850000
Z-ring associated protein G OS=Escherichia coli (strain K12) OX=83333 GN=zapG PE=1 SV=2	P0ADW3	zapG	15 kDa	22664000	32914000	39842000	70492000	78489000	56634000	18862000	8901100	4980900	27566000	38823000	92012000	32504000	51785000	30174000	32819000	38863000	45072000	68530000	23614000	30647000
Protein YhcC OS=Escherichia coli (strain K12) OX=83333 GN=yhcC PE=3 SV=1	P0ADW6	yhcC	35 kDa	0	0	0	0	59461000	2810500	0	0	0	0	0	2317600	0	0	0	0	0	0	0	0	0
Protein YhfA OS=Escherichia coli (strain K12) OX=83333 GN=yhfA PE=1 SV=1	P0ADX1	yhfA	15 kDa	120610000	129860000	0	0	39931000	0	132650000	85771000	85647000	47053000	48912000	101880000	25952000	92734000	0	20430000	18392000	0	0	80175000	17784000
Uncharacterized protein YhfG OS=Escherichia coli (strain K12) OX=83333 GN=yhfG PE=1 SV=1	P0ADX5	yhfG	7 kDa	0	0	0	36181000	19319000	22368000	0	0	0	0	0	0	0	0	0	0	0	0	0	0	0
Uncharacterized protein YhhA OS=Escherichia coli (strain K12) OX=83333 GN=yhhA PE=1 SV=1	P0ADX7	yhhA	17 kDa	0	0	0	24245000	4526900	0	0	0	0	9852100	0	0	0	0	0	0	0	0	0	0	0
Ribosomal RNA small subunit methyltransferase D OS=Escherichia coli (strain K12) OX=83333 GN=rsmD PE=1 SV=1	P0ADX9	rsmD	22 kDa	21899000	21582000	22266000	12873000	0	0	8925000	0	11482000	0	4568200	0	0	0	7088100	4672700	0	16002000	13887000	0	6482600
Periplasmic chaperone PpiD OS=Escherichia coli (strain K12) OX=83333 GN=ppiD PE=1 SV=1	P0ADY1	ppiD	68 kDa	2888900	25363000	19271000	71654000	60087000	45530000	20720000	8454500	24245000	44251000	23946000	44384000	24105000	33895000	31243000	23644000	41617000	47050000	51810000	30283000	34223000
Large ribosomal subunit protein uL14 OS=Escherichia coli (strain K12) OX=83333 GN=rplN PE=1 SV=1	P0ADY3	rplN	14 kDa	6497500000	6134000000	5084900000	8475800000	6314700000	4879200000	5227300000	4845100000	5835200000	6133900000	6039100000	6164000000	4723200000	5960000000	5013500000	6065800000	6215700000	7145500000	6046500000	5798000000	6173200000
Large ribosomal subunit protein uL16 OS=Escherichia coli (strain K12) OX=83333 GN=rplP PE=1 SV=1	P0ADY7	rplP	15 kDa	4151400000	5827600000	4845500000	5728600000	3924600000	3351900000	2955900000	3315600000	3996000000	3875400000	2747400000	3506400000	4695500000	5996100000	5137100000	4628000000	4855600000	5721800000	4489700000	4754700000	3936600000
Large ribosomal subunit protein uL23 OS=Escherichia coli (strain K12) OX=83333 GN=rplW PE=1 SV=1	P0ADZ0	rplW	11 kDa	765050000	867620000	742730000	1240100000	794860000	841460000	914810000	914930000	1051500000	745680000	912560000	760120000	1044500000	1010600000	1098100000	785580000	899780000	913760000	893990000	884770000	815080000
Small ribosomal subunit protein uS15 OS=Escherichia coli (strain K12) OX=83333 GN=rpsO PE=1 SV=2	P0ADZ4	rpsO	10 kDa	7193000000	6905100000	7538400000	10545000000	7748100000	5838900000	9521000000	7816800000	8106900000	7495800000	6980300000	6170500000	7346000000	11004000000	7699000000	6901000000	7322400000	7950800000	5857600000	6765000000	5878900000
Sec translocon accessory complex subunit YajC OS=Escherichia coli (strain K12) OX=83333 GN=yajC PE=1 SV=1	P0ADZ7	yajC	12 kDa	0	0	0	39530000	34794000	32185000	0	0	0	78459000	0	38878000	16928000	0	0	32003000	36539000	29008000	64671000	20747000	21293000
tRNA (cytidine/uridine-2'-O-)-methyltransferase TrmJ OS=Escherichia coli (strain K12) OX=83333 GN=trmJ PE=1 SV=1	P0AE01	trmJ	27 kDa	148700000	84461000	135420000	163350000	140670000	219290000	89668000	17328000	116770000	94151000	205320000	91519000	39639000	61807000	50650000	137730000	66652000	168010000	106970000	117190000	60342000
Multidrug efflux pump subunit AcrA OS=Escherichia coli (strain K12) OX=83333 GN=acrA PE=1 SV=1	P0AE06	acrA	42 kDa	42091000	60444000	78443000	65437000	35977000	39455000	34495000	27394000	36126000	96067000	36250000	55772000	38581000	47368000	41531000	32665000	26604000	47058000	58100000	25618000	22452000
Alkyl hydroperoxide reductase C OS=Escherichia coli (strain K12) OX=83333 GN=ahpC PE=1 SV=2	P0AE08	ahpC	21 kDa	12072000000	17782000000	17637000000	9904800000	5757000000	6286800000	22813000000	22854000000	23889000000	7390200000	6341500000	7508900000	14728000000	20606000000	16497000000	16088000000	16856000000	18029000000	13229000000	11735000000	11575000000
AMP nucleosidase OS=Escherichia coli (strain K12) OX=83333 GN=amn PE=1 SV=1	P0AE12	amn	54 kDa	145810000	183500000	137830000	76793000	82256000	108040000	84452000	100050000	128260000	82308000	44503000	51946000	95778000	158370000	54633000	112790000	141210000	195990000	115360000	102680000	141170000
Methionine aminopeptidase OS=Escherichia coli (strain K12) OX=83333 GN=map PE=1 SV=1	P0AE18	map	29 kDa	320130000	322940000	302150000	185080000	140860000	130870000	278890000	167280000	193000000	145650000	149920000	166220000	169000000	236080000	184800000	258530000	238740000	252980000	317710000	245930000	248600000
Class B acid phosphatase OS=Escherichia coli (strain K12) OX=83333 GN=aphA PE=1 SV=1	P0AE22	aphA	26 kDa	53877000	108160000	92924000	46342000	85731000	50226000	143250000	138210000	155820000	406450000	306490000	339880000	326470000	340320000	256620000	187060000	228790000	361860000	263030000	285650000	237200000
Arginine N-succinyltransferase OS=Escherichia coli (strain K12) OX=83333 GN=astA PE=2 SV=1	P0AE37	astA	38 kDa	6239400	0	7582500	10653000	6739200	5427100	0	0	0	0	0	0	0	0	0	0	0	0	0	0	0
Transcriptional regulatory protein YpdB OS=Escherichia coli (strain K12) OX=83333 GN=ypdB PE=1 SV=1	P0AE39	ypdB	29 kDa	0	0	0	18591000	14777000	4630200	0	0	0	2372900000	7232600	10810000	0	0	0	0	0	0	3609500	0	2693800
Gamma-glutamylcyclotransferase family protein YtfP OS=Escherichia coli (strain K12) OX=83333 GN=ytfP PE=1 SV=1	P0AE48	ytfP	13 kDa	116170000	82456000	111740000	69273000	31277000	36296000	72048000	62700000	69110000	72649000	0	77852000	22752000	45178000	38199000	35848000	45552000	36609000	41296000	24507000	40575000
Peroxiredoxin Bcp OS=Escherichia coli (strain K12) OX=83333 GN=bcp PE=1 SV=1	P0AE52	bcp	18 kDa	1459300000	1805100000	1394100000	1264500000	900970000	877390000	945000000	769250000	783820000	888690000	813160000	862540000	803690000	1231700000	771990000	1071300000	1143600000	1473100000	1053600000	992660000	910050000
Putative cation transport regulator ChaB OS=Escherichia coli (strain K12) OX=83333 GN=chaB PE=3 SV=1	P0AE63	chaB	9 kDa	19193000	29765000	39060000	44695000	41083000	33653000	0	0	0	14075000	8245400	0	0	0	0	0	0	0	0	0	0
Antitoxin MazE OS=Escherichia coli (strain K12) OX=83333 GN=mazE PE=1 SV=1	P0AE72	mazE	9 kDa	80386000	63168000	63497000	242510000	3545500	160580000	21548000	23469000	8436300	3068900	3910200	0	24437000	30590000	181450000	9506500	12798000	5582800	8746100	5340400	6439200
Magnesium and cobalt efflux protein CorC OS=Escherichia coli (strain K12) OX=83333 GN=corC PE=1 SV=1	P0AE78	corC	33 kDa	98658000	131730000	111500000	202560000	113700000	72768000	65392000	49009000	49075000	135270000	109060000	134880000	67016000	161200000	76373000	101270000	122180000	141740000	78812000	93054000	96168000
Transcriptional regulatory protein CpxR OS=Escherichia coli (strain K12) OX=83333 GN=cpxR PE=1 SV=1	P0AE88	cpxR	26 kDa	113460000	178450000	138220000	206150000	88999000	49731000	96305000	74669000	76805000	268560000	172850000	269440000	58530000	121370000	83303000	168730000	151320000	170570000	254080000	105050000	130450000
Protein CreA OS=Escherichia coli (strain K12) OX=83333 GN=creA PE=3 SV=1	P0AE91	creA	17 kDa	41225000	37954000	42101000	41370000	51303000	35778000	63372000	50616000	52485000	56433000	68238000	52104000	54544000	75830000	58477000	75646000	84127000	93349000	79408000	78831000	81497000
Siroheme synthase OS=Escherichia coli (strain K12) OX=83333 GN=cysG PE=1 SV=1	P0AEA8	cysG	50 kDa	21874000	23021000	16182000	41447000	37786000	30991000	35865000	39972000	47154000	40113000	38701000	40402000	30349000	37914000	27303000	55429000	48588000	67786000	78023000	59917000	52383000
D-alanyl-D-alanine carboxypeptidase DacA OS=Escherichia coli (strain K12) OX=83333 GN=dacA PE=1 SV=1	P0AEB2	dacA	44 kDa	31634000	36187000	18786000	67128000	50934000	40806000	19545000	18345000	20033000	37719000	24173000	50549000	23520000	41795000	33939000	24345000	44064000	41662000	40818000	18781000	24138000
RutC family protein YoaB OS=Escherichia coli (strain K12) OX=83333 GN=yoaB PE=3 SV=1	P0AEB7	yoaB	12 kDa	377850000	492310000	377470000	346890000	264260000	174020000	139700000	200280000	179930000	276680000	162710000	144030000	174800000	286840000	190260000	340920000	333030000	574600000	233780000	220720000	210080000
Aerobic respiration control sensor protein ArcB OS=Escherichia coli (strain K12) OX=83333 GN=arcB PE=1 SV=1	P0AEC3	arcB	88 kDa	51290000	51195000	44682000	35519000	31918000	22712000	29878000	32310000	36817000	35287000	26382000	48625000	39084000	34698000	27921000	43561000	43383000	49948000	57569000	40051000	37477000
Universal stress protein A OS=Escherichia coli (strain K12) OX=83333 GN=uspA PE=1 SV=2	P0AED0	uspA	16 kDa	119800000	221530000	135990000	194190000	143590000	142760000	17515000	4370100	18325000	146740000	96017000	210230000	47424000	60175000	37302000	563620000	977230000	878080000	300540000	291980000	394900000
Response regulator UvrY OS=Escherichia coli (strain K12) OX=83333 GN=uvrY PE=1 SV=1	P0AED5	uvrY	24 kDa	7820800	34865000	7669600	19783000	29460000	31080000	2065200	0	2667200	18227000	15008000	20873000	0	0	0	14404000	3969500	14533000	28034000	2970100	12050000
Succinyl-diaminopimelate desuccinylase OS=Escherichia coli (strain K12) OX=83333 GN=dapE PE=1 SV=1	P0AED7	dapE	41 kDa	59351000	73936000	67498000	41557000	34367000	26695000	67845000	100440000	72847000	40990000	29372000	48396000	54737000	82329000	63744000	91645000	92622000	82470000	76615000	93246000	40688000
DNA-cytosine methyltransferase OS=Escherichia coli (strain K12) OX=83333 GN=dcm PE=1 SV=1	P0AED9	dcm	53 kDa	28619000	41272000	47557000	23178000	10419000	16657000	59870000	65346000	48575000	35559000	31564000	39270000	40462000	42590000	35451000	33335000	35140000	34068000	49546000	34619000	34303000
Inner membrane lipoprotein DcrB OS=Escherichia coli (strain K12) OX=83333 GN=dcrB PE=1 SV=1	P0AEE1	dcrB	20 kDa	31601000	39438000	32620000	52746000	47062000	43629000	13490000	12210000	14857000	32536000	20119000	34879000	31952000	45218000	33064000	36030000	45482000	39233000	46944000	29893000	26225000
D-galactose/methyl-galactoside binding periplasmic protein MglB OS=Escherichia coli (strain K12) OX=83333 GN=mglB PE=1 SV=1	P0AEE5	mglB	36 kDa	243060000	297590000	362070000	702910000	444490000	353390000	118980000	136100000	160150000	313990000	281180000	291600000	5295900000	10339000000	5992600000	9719600000	11372000000	16598000000	5831100000	6591100000	5726800000
DNA adenine methylase OS=Escherichia coli (strain K12) OX=83333 GN=dam PE=1 SV=1	P0AEE8	dam	32 kDa	3439100	0	0	4943700	3888000	10244000	8275500	2332000	8146700	7667000	3784600	3236700	2892700	0	0	3093800	0	0	8318500	3827200	4490100
Thiol:disulfide interchange protein DsbA OS=Escherichia coli (strain K12) OX=83333 GN=dsbA PE=1 SV=1	P0AEG4	dsbA	23 kDa	336310000	454180000	409510000	369420000	279430000	253640000	313900000	323720000	348640000	336500000	274140000	323620000	338780000	546740000	366200000	563230000	410450000	521020000	383340000	346450000	335220000
Thiol:disulfide interchange protein DsbC OS=Escherichia coli (strain K12) OX=83333 GN=dsbC PE=1 SV=1	P0AEG6	dsbC	26 kDa	248530000	273510000	155130000	224560000	167720000	130350000	162270000	133560000	155950000	160320000	120120000	168920000	191220000	260020000	102950000	174390000	191090000	258560000	206080000	193400000	158460000
Protein ElaA OS=Escherichia coli (strain K12) OX=83333 GN=elaA PE=1 SV=1	P0AEH3	elaA	17 kDa	83817000	93581000	1361900000	99711000	68160000	45334000	39485000	39466000	42349000	1199000000	51362000	57161000	28295000	17011000	13399000	69154000	47180000	59365000	75550000	1225700000	1334600000
Protein ElaB OS=Escherichia coli (strain K12) OX=83333 GN=elaB PE=1 SV=1	P0AEH5	elaB	11 kDa	907750000	1243300000	1121600000	464010000	384500000	322130000	240920000	221400000	202610000	183370000	99448000	151650000	0	0	0	0	0	0	0	0	0
tRNA-2-methylthio-N(6)-dimethylallyladenosine synthase OS=Escherichia coli (strain K12) OX=83333 GN=miaB PE=1 SV=1	P0AEI1	miaB	54 kDa	91215000	136430000	75110000	224180000	158700000	135140000	53339000	37009000	58930000	164980000	191230000	165510000	30740000	37394000	28827000	210770000	308730000	253530000	175050000	185640000	145730000
Ribosomal protein uS12 methylthiotransferase RimO OS=Escherichia coli (strain K12) OX=83333 GN=rimO PE=1 SV=1	P0AEI4	rimO	50 kDa	23779000	30942000	20949000	93568000	73706000	51184000	10149000	7340200	12631000	89816000	36842000	60806000	4370600	0	2122900	75968000	68382000	59446000	71671000	67993000	79358000
Phosphatase NudJ OS=Escherichia coli (strain K12) OX=83333 GN=nudJ PE=1 SV=1	P0AEI6	nudJ	17 kDa	4822800	0	0	42221000	47299000	34628000	13442000	15050000	17602000	37386000	36571000	37574000	4215100	0	3581100	21817000	20850000	8947400	44939000	31193000	23634000
Ethanolamine ammonia-lyase large subunit OS=Escherichia coli (strain K12) OX=83333 GN=eutB PE=1 SV=1	P0AEJ6	eutB	49 kDa	0	0	0	29975000	25650000	12376000	0	0	2009400	23435000	13615000	17845000	0	0	0	0	0	0	0	0	0
3-oxoacyl-[acyl-carrier-protein] reductase FabG OS=Escherichia coli (strain K12) OX=83333 GN=fabG PE=1 SV=1	P0AEK2	fabG	26 kDa	1621900000	1997100000	1550200000	2005900000	1498400000	1198700000	1034500000	816430000	1075100000	1454500000	1309500000	1527800000	874320000	1187400000	833450000	1443500000	1312900000	1933300000	1486000000	1394800000	1289600000
Enoyl-[acyl-carrier-protein] reductase [NADH] FabI OS=Escherichia coli (strain K12) OX=83333 GN=fabI PE=1 SV=2	P0AEK4	fabI	28 kDa	3924900000	4235500000	3579400000	1948900000	1639000000	2583700000	2383900000	2236600000	2265400000	2485500000	1638400000	2445400000	2614300000	4014600000	2415100000	2822400000	2267000000	3723700000	2369600000	3729300000	2278700000
FKBP-type 16 kDa peptidyl-prolyl cis-trans isomerase OS=Escherichia coli (strain K12) OX=83333 GN=fkpB PE=1 SV=2	P0AEM0	fkpB	16 kDa	409330000	92271000	285220000	246060000	142700000	166960000	183620000	259730000	269670000	178590000	36089000	144850000	313270000	376180000	350130000	70713000	85846000	409490000	360750000	357650000	92598000
L-cystine-binding protein TcyJ OS=Escherichia coli (strain K12) OX=83333 GN=tcyJ PE=1 SV=1	P0AEM9	tcyJ	29 kDa	1552400000	1623900000	1285700000	576600000	372680000	381430000	877930000	615410000	630700000	351850000	255990000	265100000	479710000	585080000	444520000	271960000	358050000	589660000	206350000	239820000	212730000
NAD(P)H-flavin reductase OS=Escherichia coli (strain K12) OX=83333 GN=fre PE=1 SV=2	P0AEN1	fre	26 kDa	146430000	179930000	157780000	186450000	124360000	108270000	0	0	0	0	76788000	0	89012000	114120000	98282000	170580000	238770000	274410000	162660000	143490000	202900000
L-fucose mutarotase OS=Escherichia coli (strain K12) OX=83333 GN=fucU PE=1 SV=1	P0AEN8	fucU	15 kDa	48713000	64016000	49113000	93988000	59519000	44547000	45079000	66808000	70001000	66743000	57028000	62356000	32501000	66577000	51108000	76835000	119690000	101390000	120690000	125330000	107070000
UTP--glucose-1-phosphate uridylyltransferase OS=Escherichia coli (strain K12) OX=83333 GN=galU PE=1 SV=2	P0AEP3	galU	33 kDa	623440000	855260000	722370000	690600000	471920000	433480000	41124000	80183000	223970000	245450000	422900000	380820000	250090000	345750000	327870000	444970000	555610000	797740000	610210000	520350000	578880000
Glycolate oxidase subunit GlcD OS=Escherichia coli (strain K12) OX=83333 GN=glcD PE=1 SV=1	P0AEP9	glcD	54 kDa	0	0	0	0	4580600	0	0	0	0	0	0	0	0	0	0	7820300	13264000	22870000	3232500	0	4361400
Protein GlcG OS=Escherichia coli (strain K12) OX=83333 GN=glcG PE=2 SV=1	P0AEQ1	glcG	14 kDa	0	0	0	1074700000	646750000	102960000	0	0	0	55451000	0	0	92003000	240840000	120930000	1066900000	2177800000	4383900000	234960000	1308700000	1344000000
Glutamine-binding periplasmic protein OS=Escherichia coli (strain K12) OX=83333 GN=glnH PE=1 SV=1	P0AEQ3	glnH	27 kDa	722240000	583550000	667560000	783500000	543460000	560380000	297430000	282860000	343570000	170510000	263610000	294640000	1010300000	1313300000	1147300000	2100600000	2511800000	3825300000	1440900000	2184200000	2359900000
Bifunctional glutathionylspermidine synthetase/amidase OS=Escherichia coli (strain K12) OX=83333 GN=gss PE=1 SV=1	P0AES0	gss	71 kDa	356040000	383600000	287470000	64476000	79258000	736600000	109480000	101540000	1772400000	1835000000	50591000	76625000	155440000	1792400000	112730000	66856000	101320000	69191000	78132000	66566000	66454000
Glucarate dehydratase OS=Escherichia coli (strain K12) OX=83333 GN=gudD PE=1 SV=2	P0AES2	gudD	49 kDa	41174000	7001000	0	0	6174000	5561000	0	3313600	0	0	0	4467600	10875000	16367000	3313400	155580000	294340000	189260000	124740000	137230000	155140000
DNA gyrase subunit A OS=Escherichia coli (strain K12) OX=83333 GN=gyrA PE=1 SV=1	P0AES4	gyrA	97 kDa	889410000	825150000	1036100000	944040000	573960000	555380000	619170000	517920000	673520000	675610000	674340000	699200000	597890000	867060000	568560000	963370000	735130000	951630000	718270000	707180000	706670000
DNA gyrase subunit B OS=Escherichia coli (strain K12) OX=83333 GN=gyrB PE=1 SV=2	P0AES6	gyrB	90 kDa	453660000	667850000	509420000	540310000	377560000	290460000	183060000	164920000	175300000	368080000	358380000	406080000	126860000	208750000	145370000	512640000	410170000	379270000	350260000	436100000	293330000
Acid stress chaperone HdeA OS=Escherichia coli (strain K12) OX=83333 GN=hdeA PE=1 SV=1	P0AES9	hdeA	12 kDa	0	0	0	237150000	173840000	205780000	0	0	0	118510000	151490000	372590000	0	0	0	0	0	0	28181000	0	0
Acid stress chaperone HdeB OS=Escherichia coli (strain K12) OX=83333 GN=hdeB PE=1 SV=1	P0AET2	hdeB	12 kDa	14989000	28883000	8773000	605040000	389630000	472160000	60283000	48679000	41604000	542640000	326250000	449160000	0	7217000	5227700	8482400	14257000	14626000	28190000	19414000	18159000
7alpha-hydroxysteroid dehydrogenase OS=Escherichia coli (strain K12) OX=83333 GN=hdhA PE=1 SV=1	P0AET8	hdhA	27 kDa	869750000	663820000	809830000	856310000	593160000	513410000	655940000	543850000	561790000	608220000	487120000	685500000	122510000	183410000	74991000	240310000	175630000	258740000	249080000	296690000	232850000
Histidine-binding periplasmic protein OS=Escherichia coli (strain K12) OX=83333 GN=hisJ PE=1 SV=1	P0AEU0	hisJ	28 kDa	319980000	226850000	269370000	147760000	104900000	102820000	146770000	114480000	145020000	142400000	23308000	112820000	493970000	629350000	467970000	456240000	489110000	614340000	517090000	454200000	499630000
Chaperone protein Skp OS=Escherichia coli (strain K12) OX=83333 GN=skp PE=1 SV=1	P0AEU7	skp	18 kDa	2064800000	2661900000	1371600000	1931200000	1637600000	671230000	1301700000	1022400000	1377000000	1125300000	757880000	975960000	1205600000	1998600000	822060000	1264700000	1584700000	1596200000	919500000	1356100000	1088500000
3',5'-cyclic adenosine monophosphate phosphodiesterase CpdA OS=Escherichia coli (strain K12) OX=83333 GN=cpdA PE=1 SV=1	P0AEW4	cpdA	31 kDa	8651700	30514000	14107000	25657000	31985000	11881000	14683000	23615000	39435000	39702000	78848000	27788000	25650000	16155000	23871000	38423000	28826000	27991000	39066000	61033000	59330000
Guanosine-inosine kinase OS=Escherichia coli (strain K12) OX=83333 GN=gsk PE=1 SV=1	P0AEW6	gsk	48 kDa	50230000	54833000	39852000	57576000	50208000	43196000	29578000	22116000	39789000	43328000	61585000	51656000	45086000	61325000	54017000	74480000	83485000	114500000	73864000	77600000	57954000
1-phosphofructokinase OS=Escherichia coli (strain K12) OX=83333 GN=fruK PE=1 SV=1	P0AEW9	fruK	34 kDa	66793000	77802000	67345000	67732000	29597000	46018000	51762000	38835000	47626000	50645000	31024000	54217000	35214000	30068000	24939000	32770000	55135000	58782000	29118000	42170000	49731000
Alpha-ketoglutarate permease OS=Escherichia coli (strain K12) OX=83333 GN=kgtP PE=1 SV=1	P0AEX3	kgtP	47 kDa	6311200	27623000	11409000	4968700	11402000	7750400	2735400	976700	2663000	2156400	1258000	8120400	7053100	12885000	11220000	9875500	18845000	20049000	20824000	12531000	7935000
Probable phosphoribulokinase OS=Escherichia coli (strain K12) OX=83333 GN=prkB PE=3 SV=1	P0AEX5	prkB	32 kDa	12376000	20761000	21843000	15767000	9071500	5889800	6836600	10967000	8505000	13255000	15850000	0	15410000	14787000	13759000	15424000	30314000	46323000	24120000	23442000	21688000
Maltose/maltodextrin-binding periplasmic protein OS=Escherichia coli (strain K12) OX=83333 GN=malE PE=1 SV=1	P0AEX9	malE	43 kDa	1961400000	3721400000	2767800000	6416300000	4904800000	2890900000	971230000	737300000	618610000	6089400000	3260800000	5110400000	943620000	3028600000	1240700000	3113800000	3890000000	4977000000	3031900000	3919600000	3306900000
Nucleoside triphosphate pyrophosphohydrolase OS=Escherichia coli (strain K12) OX=83333 GN=mazG PE=1 SV=1	P0AEY3	mazG	30 kDa	26539000	13566000	13726000	15753000	35306000	3392500	4695300	3276900	0	6642800	11897000	3707100	2717000	3852900	2248300	9127300	10222000	5193200	96104000	7027200	9044500
NADPH:quinone oxidoreductase MdaB OS=Escherichia coli (strain K12) OX=83333 GN=mdaB PE=1 SV=1	P0AEY5	mdaB	22 kDa	325480000	439730000	493900000	154840000	151070000	92501000	151890000	159070000	186950000	88961000	100420000	76597000	274410000	423700000	319810000	99747000	231510000	152850000	172590000	101420000	93375000
Septum site-determining protein MinD OS=Escherichia coli (strain K12) OX=83333 GN=minD PE=1 SV=2	P0AEZ3	minD	30 kDa	154900000	194240000	146300000	306260000	175960000	175990000	105560000	81123000	92836000	214430000	178060000	293100000	104320000	154680000	148520000	219820000	333640000	497570000	310550000	224790000	238060000
Molybdenum cofactor biosynthesis protein B OS=Escherichia coli (strain K12) OX=83333 GN=moaB PE=1 SV=2	P0AEZ9	moaB	19 kDa	1940500000	2057800000	2079000000	560660000	429890000	305060000	901020000	820750000	1031100000	337770000	330700000	416440000	725550000	860220000	705070000	167050000	173120000	214880000	344910000	285820000	325240000
Molybdopterin adenylyltransferase OS=Escherichia coli (strain K12) OX=83333 GN=mog PE=1 SV=1	P0AF03	mog	21 kDa	117670000	171230000	101880000	211730000	147230000	85781000	152520000	136510000	158370000	130120000	92894000	162100000	143900000	237540000	138160000	165590000	211890000	233240000	235470000	183470000	270560000
Iron-sulfur cluster carrier protein OS=Escherichia coli (strain K12) OX=83333 GN=mrp PE=3 SV=1	P0AF08	mrp	40 kDa	155610000	224880000	154590000	147510000	77585000	131980000	81518000	46849000	59387000	221560000	86540000	147210000	71610000	109250000	59789000	60282000	99868000	161640000	91931000	69309000	94762000
5'-methylthioadenosine/S-adenosylhomocysteine nucleosidase OS=Escherichia coli (strain K12) OX=83333 GN=mtnN PE=1 SV=1	P0AF12	mtnN	24 kDa	149680000	264220000	88920000	228390000	112790000	113370000	13111000	16723000	12990000	65600000	76252000	124130000	39656000	47487000	31388000	282970000	228030000	353160000	114610000	154420000	152830000
N-acetylglucosamine-6-phosphate deacetylase OS=Escherichia coli (strain K12) OX=83333 GN=nagA PE=1 SV=1	P0AF18	nagA	41 kDa	285210000	283280000	250180000	146110000	105760000	93651000	155050000	143770000	138760000	93460000	87137000	115040000	175320000	248320000	171630000	112410000	103950000	124000000	84156000	93446000	82766000
N-acetylglucosamine repressor OS=Escherichia coli (strain K12) OX=83333 GN=nagC PE=2 SV=1	P0AF20	nagC	45 kDa	78505000	56076000	41509000	86763000	56223000	47697000	32841000	19081000	32888000	65888000	60431000	78101000	5559300	31379000	25458000	122660000	105430000	136480000	112720000	114390000	86927000
Ribonucleotide monophosphatase NagD OS=Escherichia coli (strain K12) OX=83333 GN=nagD PE=1 SV=1	P0AF24	nagD	27 kDa	134250000	143370000	158500000	154570000	110930000	109880000	56603000	68282000	81421000	104790000	89756000	93356000	21788000	46752000	23339000	127780000	109960000	231700000	107830000	112100000	91415000
Nitrate reductase molybdenum cofactor assembly chaperone NarJ OS=Escherichia coli (strain K12) OX=83333 GN=narJ PE=1 SV=1	P0AF26	narJ	26 kDa	0	5629700	3669100	34118000	5938800	8190300	9933000	7376000	6535000	13426000	7942000	28036000	0	0	0	0	0	0	0	0	0
Nitrate/nitrite response regulator protein NarL OS=Escherichia coli (strain K12) OX=83333 GN=narL PE=1 SV=1	P0AF28	narL	24 kDa	105070000	155510000	116830000	329070000	255840000	188470000	128390000	54461000	120870000	237350000	220840000	265230000	48062000	81513000	57306000	314870000	252520000	471150000	136780000	200130000	172380000
Cell division protein ZapB OS=Escherichia coli (strain K12) OX=83333 GN=zapB PE=1 SV=1	P0AF36	zapB	10 kDa	158710000	198620000	243690000	386540000	279970000	125520000	182880000	96729000	210030000	149040000	107100000	140220000	181590000	249370000	199920000	289790000	816920000	400550000	259610000	226580000	135050000
UPF0047 protein YjbQ OS=Escherichia coli (strain K12) OX=83333 GN=yjbQ PE=3 SV=1	P0AF48	yjbQ	16 kDa	4160400	6722500	7476200	21309000	14606000	11441000	3025300	3427700	5657500	8447700	13207000	0	3216100	3562900	0	5601900	7957400	0	5317600	4934800	0
Uncharacterized protein YjbR OS=Escherichia coli (strain K12) OX=83333 GN=yjbR PE=1 SV=1	P0AF50	yjbR	14 kDa	177020000	72895000	196490000	480810000	275290000	229740000	65483000	131130000	131640000	298840000	194340000	264020000	102850000	180900000	54279000	175840000	88865000	294100000	160220000	160780000	122950000
Sel1-repeat-containing protein YjcO OS=Escherichia coli (strain K12) OX=83333 GN=yjcO PE=3 SV=1	P0AF56	yjcO	25 kDa	0	0	0	0	0	0	0	0	0	0	0	2846900	0	0	0	12668000	0	0	10601000	0	8365600
Uncharacterized protein YjdI OS=Escherichia coli (strain K12) OX=83333 GN=yjdI PE=4 SV=1	P0AF59	yjdI	9 kDa	0	0	0	89360000	12291000	39686000	0	0	0	0	0	0	0	0	0	0	0	0	0	0	0
HTH-type transcriptional repressor NsrR OS=Escherichia coli (strain K12) OX=83333 GN=nsrR PE=3 SV=1	P0AF63	nsrR	16 kDa	0	0	0	0	7014800	16158000	0	0	0	6003800	4403100	5314400	0	2828500	0	0	6195600	5519100	4882300	11255000	11611000
tRNA threonylcarbamoyladenosine biosynthesis protein TsaE OS=Escherichia coli (strain K12) OX=83333 GN=tsaE PE=1 SV=1	P0AF67	tsaE	17 kDa	133180000	62832000	45194000	29095000	60328000	78682000	41797000	70546000	77105000	29912000	31548000	30951000	61883000	96436000	53849000	37907000	37964000	110710000	20974000	0	33323000
Regulator of ribonuclease activity B OS=Escherichia coli (strain K12) OX=83333 GN=rraB PE=1 SV=1	P0AF90	rraB	16 kDa	241570000	186440000	231930000	311880000	247880000	185510000	219670000	248390000	232940000	63027000	177750000	217850000	164350000	280360000	79717000	294290000	66482000	129830000	312920000	338950000	298570000
2-iminobutanoate/2-iminopropanoate deaminase OS=Escherichia coli (strain K12) OX=83333 GN=ridA PE=1 SV=2	P0AF93	ridA	14 kDa	1901000000	1968400000	1915700000	3441700000	2606300000	2020000000	1387900000	1030900000	656240000	2729000000	2661900000	2612000000	2152300000	2919700000	2275800000	4014200000	3978900000	6013900000	3910200000	4510600000	4001900000
Toxin-antitoxin biofilm protein TabA OS=Escherichia coli (strain K12) OX=83333 GN=tabA PE=1 SV=1	P0AF96	tabA	17 kDa	99855000	134070000	26664000	11074000	0	11756000	0	33861000	7612600	11315000	18813000	11361000	0	33633000	11091000	63325000	79325000	10018000	7781100	52600000	5995800
Lipopolysaccharide export system permease protein LptF OS=Escherichia coli (strain K12) OX=83333 GN=lptF PE=1 SV=1	P0AF98	lptF	40 kDa	0	0	0	7896700	2348300	0	0	0	0	0	0	0	0	0	0	0	0	0	0	0	0
DNA-binding transcriptional regulator NtrC OS=Escherichia coli (strain K12) OX=83333 GN=glnG PE=1 SV=1	P0AFB8	glnG	52 kDa	6329100	16132000	8006900	28207000	25641000	23461000	1449700	0	1871200	10466000	15655000	9330500	0	2335200	2311300	3578400	0	17955000	13724000	11502000	12807000
NADH-quinone oxidoreductase subunit A OS=Escherichia coli (strain K12) OX=83333 GN=nuoA PE=1 SV=1	P0AFC3	nuoA	16 kDa	19857000	14632000	4681500	59084000	41129000	35202000	3672900	0	3674600	18783000	16688000	32388000	0	0	10540000	10137000	5648800	18710000	28677000	13396000	16375000
NADH-quinone oxidoreductase subunit B OS=Escherichia coli (strain K12) OX=83333 GN=nuoB PE=1 SV=1	P0AFC7	nuoB	25 kDa	48123000	60717000	49868000	158640000	113160000	67939000	12467000	3504600	18606000	121490000	66130000	76385000	21646000	38183000	30276000	70250000	72311000	96103000	97182000	73790000	63933000
NADH-quinone oxidoreductase subunit E OS=Escherichia coli (strain K12) OX=83333 GN=nuoE PE=1 SV=1	P0AFD1	nuoE	19 kDa	249800000	227700000	197440000	115360000	93978000	82160000	86939000	81775000	90243000	77275000	60766000	55839000	184750000	213950000	148350000	129160000	96979000	192440000	176980000	135180000	135860000
NADH-quinone oxidoreductase subunit H OS=Escherichia coli (strain K12) OX=83333 GN=nuoH PE=1 SV=1	P0AFD4	nuoH	36 kDa	2932200	3618700	2358500	6089000	3926700	3466600	0	0	0	4032200	0	0	0	0	10412000	15675000	19094000	25284000	29274000	0	0
NADH-quinone oxidoreductase subunit I OS=Escherichia coli (strain K12) OX=83333 GN=nuoI PE=1 SV=1	P0AFD6	nuoI	21 kDa	18655000	5673800	4210800	128760000	111660000	49295000	0	6460500	7408800	55894000	50163000	53797000	8639500	2928600	15148000	33047000	29492000	47517000	97670000	56067000	39911000
Nucleoside permease NupC OS=Escherichia coli (strain K12) OX=83333 GN=nupC PE=1 SV=1	P0AFF2	nupC	43 kDa	0	0	0	48562000	42813000	34447000	0	0	5067600	38352000	30026000	45192000	0	0	3453100	0	0	0	0	0	2853400
Transcription termination/antitermination protein NusA OS=Escherichia coli (strain K12) OX=83333 GN=nusA PE=1 SV=1	P0AFF6	nusA	55 kDa	745980000	1178700000	1386700000	1663300000	1333500000	1240600000	1063200000	732810000	526680000	1363100000	1097800000	1312900000	875040000	1092100000	790340000	1287000000	1142700000	926710000	1147900000	1199900000	1085300000
Transcription termination/antitermination protein NusG OS=Escherichia coli (strain K12) OX=83333 GN=nusG PE=1 SV=2	P0AFG0	nusG	21 kDa	473880000	528620000	496340000	641380000	451490000	368030000	317420000	282180000	334230000	403700000	396280000	388200000	262240000	378540000	300340000	400650000	400130000	427880000	344400000	324110000	324000000
2-oxoglutarate dehydrogenase E1 component OS=Escherichia coli (strain K12) OX=83333 GN=sucA PE=1 SV=1	P0AFG3	sucA	105 kDa	2932700000	2745800000	3194600000	1352400000	1067100000	952640000	158870000	153170000	157520000	279980000	258700000	328770000	3953200000	6068100000	3904100000	2207900000	2062700000	3977000000	1868400000	2919600000	2422800000
Dihydrolipoyllysine-residue succinyltransferase component of 2-oxoglutarate dehydrogenase complex OS=Escherichia coli (strain K12) OX=83333 GN=sucB PE=1 SV=2	P0AFG6	sucB	44 kDa	6182400000	6156600000	6151200000	2825200000	2044900000	1905900000	427550000	319010000	383960000	629510000	600530000	718260000	7272200000	11879000000	9044400000	4196000000	5676400000	6026100000	4363100000	4531300000	5040000000
Pyruvate dehydrogenase E1 component OS=Escherichia coli (strain K12) OX=83333 GN=aceE PE=1 SV=2	P0AFG8	aceE	100 kDa	9905300000	12050000000	9502900000	5073900000	4334200000	3170300000	9238200000	7506200000	10607000000	4447700000	3522800000	3465000000	10394000000	20452000000	11540000000	8236000000	7938800000	11994000000	7356300000	9972800000	7843100000
Osmotically-inducible protein Y OS=Escherichia coli (strain K12) OX=83333 GN=osmY PE=1 SV=1	P0AFH8	osmY	21 kDa	8306700000	7494000000	7319600000	2645000000	1663200000	1104700000	856240000	765620000	958770000	1359000000	1093800000	1519400000	154580000	212320000	131640000	35388000	91161000	32663000	90062000	81802000	59582000
DNA topoisomerase 4 subunit A OS=Escherichia coli (strain K12) OX=83333 GN=parC PE=1 SV=1	P0AFI2	parC	84 kDa	95823000	104170000	96626000	362630000	352120000	244110000	41400000	35999000	42543000	107600000	92389000	276900000	43185000	59776000	37335000	152330000	82608000	196370000	130620000	177510000	131390000
Pyridoxine/pyridoxamine 5'-phosphate oxidase OS=Escherichia coli (strain K12) OX=83333 GN=pdxH PE=1 SV=2	P0AFI7	pdxH	26 kDa	31500000	62496000	24149000	142080000	99862000	101150000	14413000	9255500	0	82852000	74587000	90118000	15598000	21198000	15147000	40684000	48543000	92662000	49006000	34670000	43713000
Protein YjdM OS=Escherichia coli (strain K12) OX=83333 GN=yjdM PE=3 SV=1	P0AFJ1	yjdM	12 kDa	125060000	163620000	94140000	338270000	119920000	161170000	109480000	132890000	95767000	232610000	180700000	275280000	125650000	145240000	100030000	172500000	159840000	214560000	106270000	210960000	86814000
Phosphate regulon transcriptional regulatory protein PhoB OS=Escherichia coli (strain K12) OX=83333 GN=phoB PE=1 SV=1	P0AFJ5	phoB	26 kDa	0	1988600	0	0	0	0	0	0	0	0	0	0	0	0	0	8671500	0	0	0	0	0
Low-affinity inorganic phosphate transporter PitA OS=Escherichia coli (strain K12) OX=83333 GN=pitA PE=1 SV=1	P0AFJ7	pitA	53 kDa	0	0	0	8425600	0	5792300	0	0	0	0	0	0	0	0	0	0	0	0	0	0	0
Metalloprotease PmbA OS=Escherichia coli (strain K12) OX=83333 GN=pmbA PE=1 SV=1	P0AFK0	pmbA	48 kDa	416070000	488540000	396050000	466680000	314550000	296610000	242590000	216170000	226660000	229450000	195870000	235450000	240610000	405430000	247890000	254010000	245780000	302040000	253600000	218130000	262170000
Spermidine/putrescine-binding periplasmic protein OS=Escherichia coli (strain K12) OX=83333 GN=potD PE=1 SV=1	P0AFK9	potD	39 kDa	442040000	643070000	481360000	505090000	412690000	334900000	426480000	396900000	439850000	444310000	457540000	517670000	855670000	1247900000	877330000	1110100000	1569100000	1911300000	1357100000	1406600000	1327400000
Peptidyl-prolyl cis-trans isomerase A OS=Escherichia coli (strain K12) OX=83333 GN=ppiA PE=1 SV=1	P0AFL3	ppiA	20 kDa	259890000	261210000	273580000	204530000	191970000	161130000	196360000	166360000	153840000	128790000	152950000	151160000	173130000	255800000	183880000	197190000	162140000	240270000	183480000	165130000	178530000
Exopolyphosphatase OS=Escherichia coli (strain K12) OX=83333 GN=ppx PE=1 SV=2	P0AFL6	ppx	58 kDa	62403000	79671000	59465000	85854000	78772000	58145000	2824900	0	2831000	56297000	55728000	49262000	0	4279200	2012400	54200000	56346000	92943000	68891000	53456000	71675000
Glycine betaine/proline betaine-binding periplasmic protein OS=Escherichia coli (strain K12) OX=83333 GN=proX PE=1 SV=1	P0AFM2	proX	36 kDa	753190000	1153300000	688190000	479570000	408020000	260660000	614930000	502710000	576990000	486170000	510860000	581600000	339380000	556790000	226490000	203970000	213860000	225050000	76284000	133730000	129730000
Phage shock protein A OS=Escherichia coli (strain K12) OX=83333 GN=pspA PE=1 SV=2	P0AFM6	pspA	25 kDa	84276000	93801000	104380000	114070000	76734000	63264000	69934000	72820000	66844000	69455000	40253000	83182000	119670000	166700000	113510000	135760000	135880000	148420000	140460000	115620000	96282000
GTP cyclohydrolase 1 type 2 homolog OS=Escherichia coli (strain K12) OX=83333 GN=ybgI PE=1 SV=1	P0AFP6	ybgI	27 kDa	529080000	510200000	573780000	543910000	500570000	336740000	488580000	474990000	600800000	355860000	276680000	334930000	474180000	657840000	461560000	366710000	374230000	479100000	394290000	306670000	267970000
Uncharacterized metal-dependent hydrolase YcfH OS=Escherichia coli (strain K12) OX=83333 GN=ycfH PE=1 SV=1	P0AFQ7	ycfH	30 kDa	72831000	77686000	72009000	74449000	57374000	57106000	79189000	67343000	60664000	39084000	49638000	37005000	42489000	52673000	31314000	29486000	45601000	23561000	46282000	42899000	40810000
Uncharacterized protein YciO OS=Escherichia coli (strain K12) OX=83333 GN=yciO PE=1 SV=1	P0AFR4	yciO	23 kDa	97473000	86174000	57563000	266250000	182060000	124980000	41669000	22592000	38391000	63935000	66544000	99857000	13811000	14609000	25735000	31318000	28452000	49769000	57500000	62755000	31844000
Transcriptional regulatory protein BtsR OS=Escherichia coli (strain K12) OX=83333 GN=btsR PE=1 SV=1	P0AFT5	btsR	27 kDa	0	224920000	0	0	5986800	0	123090000	0	98396000	4346400	4575600	5595600	0	0	0	28209000	81466000	41238000	27886000	14945000	28204000
Transcriptional regulatory protein GlrR OS=Escherichia coli (strain K12) OX=83333 GN=glrR PE=1 SV=1	P0AFU4	glrR	49 kDa	385760000	434620000	400220000	532290000	313380000	259010000	360570000	0	417200000	381930000	304730000	1785000	348630000	0	432940000	372810000	338180000	362040000	309250000	292180000	295500000
Riboflavin synthase OS=Escherichia coli (strain K12) OX=83333 GN=ribC PE=1 SV=1	P0AFU8	ribC	23 kDa	245230000	248310000	247450000	386890000	321770000	238250000	367960000	333730000	408840000	324980000	332980000	336890000	272660000	369150000	227180000	284810000	307580000	307000000	326830000	268570000	249150000
Ribosome modulation factor OS=Escherichia coli (strain K12) OX=83333 GN=rmf PE=1 SV=1	P0AFW2	rmf	7 kDa	0	0	0	383190000	253670000	206910000	122170000	191210000	181670000	121970000	88873000	126980000	281510000	253340000	170840000	42846000	23460000	22713000	61601000	56559000	52585000
Regulator of nucleoside diphosphate kinase OS=Escherichia coli (strain K12) OX=83333 GN=rnk PE=1 SV=1	P0AFW4	rnk	15 kDa	10398000	14517000	11622000	20594000	0	13545000	5148900	9377800	0	14145000	15172000	13523000	18533000	17454000	13863000	36319000	35386000	46400000	35480000	46016000	27190000
Protein rof OS=Escherichia coli (strain K12) OX=83333 GN=rof PE=1 SV=1	P0AFW8	rof	9 kDa	134580000	176820000	158170000	97611000	17414000	50044000	88645000	79596000	75862000	48262000	49275000	44666000	59557000	111160000	87251000	85269000	81716000	79909000	56002000	72417000	74182000
Ribosome hibernation promoting factor OS=Escherichia coli (strain K12) OX=83333 GN=hpf PE=1 SV=1	P0AFX0	hpf	11 kDa	634580000	812960000	575180000	798480000	549250000	418500000	252210000	164210000	210470000	331770000	431320000	455570000	242680000	313910000	176590000	276600000	464650000	298190000	480820000	431900000	424250000
Regulator of sigma D OS=Escherichia coli (strain K12) OX=83333 GN=rsd PE=1 SV=1	P0AFX4	rsd	18 kDa	18773000	35654000	17957000	22416000	41472000	30571000	5178200	3733800	0	7750100	6580900	8871700	14393000	26314000	20271000	38234000	43887000	48866000	29338000	0	16414000
Sigma-E factor regulatory protein RseB OS=Escherichia coli (strain K12) OX=83333 GN=rseB PE=1 SV=1	P0AFX9	rseB	36 kDa	36043000	23737000	26987000	0	4748000	6538300	17612000	16985000	13171000	22994000	8651400	0	0	0	4818900	9571200	0	11398000	0	0	0
Negative modulator of initiation of replication OS=Escherichia coli (strain K12) OX=83333 GN=seqA PE=1 SV=1	P0AFY8	seqA	20 kDa	262100000	284850000	312020000	248800000	283830000	144180000	160880000	196770000	238990000	261330000	224340000	255230000	181770000	382790000	225040000	335300000	457620000	504550000	299480000	339220000	290820000
Protein SseB OS=Escherichia coli (strain K12) OX=83333 GN=sseB PE=4 SV=1	P0AFZ1	sseB	29 kDa	10668000	10229000	10659000	0	0	0	0	0	0	0	0	0	0	0	0	0	0	11288000	0	0	0
Stringent starvation protein B OS=Escherichia coli (strain K12) OX=83333 GN=sspB PE=1 SV=1	P0AFZ3	sspB	18 kDa	84318000	62082000	61510000	103100000	77359000	66162000	42168000	63066000	50562000	64861000	50462000	37404000	47623000	61874000	41984000	78519000	52636000	0	0	56830000	92741000
Flavin prenyltransferase UbiX OS=Escherichia coli (strain K12) OX=83333 GN=ubiX PE=2 SV=1	P0AG03	ubiX	21 kDa	8077200	13824000	4506400	0	3504300	12037000	17794000	26661000	44708000	2543900	0	2356400	0	8173900	11814000	12649000	6494300	0	11232000	19509000	10944000
Ribulose-phosphate 3-epimerase OS=Escherichia coli (strain K12) OX=83333 GN=rpe PE=1 SV=1	P0AG07	rpe	25 kDa	546170000	653950000	565050000	417670000	316480000	206440000	299880000	311010000	341480000	303160000	261950000	206110000	332120000	430940000	283000000	421460000	485130000	594830000	538820000	421120000	301000000
Probable protease SohB OS=Escherichia coli (strain K12) OX=83333 GN=sohB PE=1 SV=1	P0AG14	sohB	39 kDa	11182000	21069000	0	11522000	35797000	43296000	8340200	12449000	0	3535600	5402100	36596000	14499000	6288400	17470000	15719000	23689000	10500000	29560000	14426000	18237000
Amidophosphoribosyltransferase OS=Escherichia coli (strain K12) OX=83333 GN=purF PE=1 SV=2	P0AG16	purF	56 kDa	35284000	77434000	29320000	20827000	16665000	18185000	5221300	4959500	0	34491000	19714000	47707000	0	24348000	7554200	17374000	16497000	50609000	6154100	34387000	12191000
N5-carboxyaminoimidazole ribonucleotide mutase OS=Escherichia coli (strain K12) OX=83333 GN=purE PE=1 SV=2	P0AG18	purE	18 kDa	24521000	46639000	17004000	18218000	17033000	12302000	14119000	9557000	32581000	10934000	15290000	0	15206000	19770000	17146000	16722000	17287000	16579000	11894000	10662000	7021600
GTP pyrophosphokinase OS=Escherichia coli (strain K12) OX=83333 GN=relA PE=1 SV=1	P0AG20	relA	84 kDa	20548000	314540000	14404000	48848000	30678000	26692000	0	2782500	0	17365000	34168000	37497000	0	14958000	4393300	23845000	34335000	41831000	37926000	20888000	27394000
Bifunctional (p)ppGpp synthase/hydrolase SpoT OS=Escherichia coli (strain K12) OX=83333 GN=spoT PE=1 SV=1	P0AG24	spoT	79 kDa	17651000	29887000	34812000	36282000	17306000	8836100	13505000	17450000	23615000	16557000	21615000	23891000	7656500	0	0	14233000	10744000	28361000	23468000	28036000	21512000
Uncharacterized protein YibN OS=Escherichia coli (strain K12) OX=83333 GN=yibN PE=1 SV=1	P0AG27	yibN	16 kDa	2893700	0	4166400	31865000	21454000	24537000	4249600	0	0	40779000	17935000	41475000	0	4643200	2735000	0	4677100	19412000	24743000	3121400	3661600
Transcription termination factor Rho OS=Escherichia coli (strain K12) OX=83333 GN=rho PE=1 SV=1	P0AG30	rho	47 kDa	1064500000	1309100000	1096300000	1184200000	773880000	694930000	863670000	819170000	814660000	806350000	688160000	771430000	654140000	785540000	686370000	777710000	839850000	934280000	736560000	684820000	671840000
Bifunctional riboflavin kinase/FMN adenylyltransferase OS=Escherichia coli (strain K12) OX=83333 GN=ribF PE=1 SV=1	P0AG40	ribF	35 kDa	50989000	58692000	51488000	43657000	57302000	34150000	2514700	3613600	15247000	47666000	55109000	44842000	3268000	0	3712300	26715000	48300000	35322000	28103000	25087000	41122000
Large ribosomal subunit protein bL17 OS=Escherichia coli (strain K12) OX=83333 GN=rplQ PE=1 SV=1	P0AG44	rplQ	14 kDa	4955300000	5722100000	4846900000	7988600000	5772500000	4825800000	6927700000	6750200000	6118400000	5481100000	5146600000	5019000000	5655000000	7521100000	5935500000	5400200000	5594000000	7075900000	5266400000	5687100000	5112100000
Large ribosomal subunit protein bL21 OS=Escherichia coli (strain K12) OX=83333 GN=rplU PE=1 SV=1	P0AG48	rplU	12 kDa	3110700000	3629500000	2910800000	5261600000	3665800000	2853100000	3874500000	3623900000	4346000000	3637700000	3127700000	3374300000	3898500000	4887400000	4103800000	2142300000	3592900000	4622800000	3397800000	3262500000	3410300000
Large ribosomal subunit protein uL30 OS=Escherichia coli (strain K12) OX=83333 GN=rpmD PE=1 SV=2	P0AG51	rpmD	7 kDa	2153100000	2334300000	2340600000	3727400000	2495800000	2071600000	1711700000	1634000000	1819700000	2249000000	1941000000	2686500000	1340800000	1421200000	1456200000	2337300000	2017100000	2335000000	2011500000	2399600000	2020100000
Large ribosomal subunit protein uL6 OS=Escherichia coli (strain K12) OX=83333 GN=rplF PE=1 SV=2	P0AG55	rplF	19 kDa	6766300000	9163800000	6733200000	10523000000	7479200000	5976300000	6609500000	5858900000	6264700000	6042500000	5609100000	4713300000	6243800000	8750600000	6941100000	6654300000	7243800000	9377100000	7511900000	6461900000	6449300000
Small ribosomal subunit protein uS14 OS=Escherichia coli (strain K12) OX=83333 GN=rpsN PE=1 SV=2	P0AG59	rpsN	12 kDa	1887500000	2131600000	1972400000	2643500000	1991400000	1894300000	1922400000	1543700000	2105000000	1564100000	1617700000	1872700000	2120900000	2324300000	2002600000	1889700000	1972600000	2456600000	1916300000	1996900000	1751400000
Small ribosomal subunit protein uS17 OS=Escherichia coli (strain K12) OX=83333 GN=rpsQ PE=1 SV=2	P0AG63	rpsQ	10 kDa	1221100000	1875200000	1521800000	2002700000	1400700000	1114500000	859640000	1053000000	973950000	1311400000	1064900000	1252700000	1258800000	1594900000	1186000000	1469000000	1435300000	1436600000	1451100000	1427000000	1533800000
Small ribosomal subunit protein bS1 OS=Escherichia coli (strain K12) OX=83333 GN=rpsA PE=1 SV=1	P0AG67	rpsA	61 kDa	5764200000	7213600000	6999900000	9021300000	6142100000	5415700000	5476500000	5332700000	5674400000	6081800000	5039500000	4717900000	7399600000	9160500000	7562600000	6272300000	7255900000	6598300000	6312200000	5728800000	6045300000
Nuclease SbcCD subunit D OS=Escherichia coli (strain K12) OX=83333 GN=sbcD PE=1 SV=1	P0AG76	sbcD	45 kDa	0	0	0	0	0	0	0	0	0	0	0	0	0	0	0	0	5107400	0	5315800	0	0
Sulfate-binding protein OS=Escherichia coli (strain K12) OX=83333 GN=sbp PE=1 SV=1	P0AG78	sbp	37 kDa	132430000	189430000	117370000	0	0	0	57653000	16238000	12795000	0	0	0	0	0	0	0	0	0	0	0	0
sn-glycerol-3-phosphate-binding periplasmic protein UgpB OS=Escherichia coli (strain K12) OX=83333 GN=ugpB PE=1 SV=1	P0AG80	ugpB	48 kDa	248840000	264350000	250480000	188620000	140270000	150160000	12575000	5981400	2254400	5566200	9945400	10577000	55571000	77590000	60064000	20382000	20872000	38942000	18988000	13966000	9757100
Phosphate-binding protein PstS OS=Escherichia coli (strain K12) OX=83333 GN=pstS PE=1 SV=1	P0AG82	pstS	37 kDa	93888000	100030000	89722000	96371000	49025000	41371000	100480000	68160000	87796000	178660000	112710000	158330000	111050000	140900000	102640000	94783000	107640000	125360000	88059000	83891000	97840000
Uncharacterized oxidoreductase YghA OS=Escherichia coli (strain K12) OX=83333 GN=yghA PE=1 SV=1	P0AG84	yghA	31 kDa	259500000	491850000	328010000	708550000	322730000	251350000	34442000	58033000	53911000	60725000	77417000	91004000	0	0	0	0	0	0	0	0	0
Protein-export protein SecB OS=Escherichia coli (strain K12) OX=83333 GN=secB PE=1 SV=1	P0AG86	secB	17 kDa	1191800000	1720400000	1318500000	2718000000	1764000000	1580700000	605040000	521910000	634890000	1531900000	1398700000	1451400000	521520000	760500000	482310000	1637400000	2383400000	2483200000	1265000000	1293800000	1245000000
Protein translocase subunit SecD OS=Escherichia coli (strain K12) OX=83333 GN=secD PE=1 SV=1	P0AG90	secD	67 kDa	0	86507000	68778000	123990000	87362000	67053000	5135500	30251000	35050000	95776000	50612000	73378000	41972000	59334000	46142000	61231000	75157000	105940000	92733000	49799000	52446000
Protein translocase subunit SecF OS=Escherichia coli (strain K12) OX=83333 GN=secF PE=1 SV=1	P0AG93	secF	35 kDa	0	5405200	0	20301000	14491000	12111000	6404500	5335500	7406700	14400000	3674700	12227000	4413300	7214300	7733400	2840600	8143500	8195900	8093900	3533500	9422200
Protein translocase subunit SecE OS=Escherichia coli (strain K12) OX=83333 GN=secE PE=1 SV=1	P0AG96	secE	14 kDa	2645700	3951000	2542000	8652100	6626100	5876200	2469400	0	2297100	6494700	4953900	6616300	2862400	0	3425700	0	4135100	2738900	6162100	1943000	1903600
Protein-export membrane protein SecG OS=Escherichia coli (strain K12) OX=83333 GN=secG PE=1 SV=1	P0AG99	secG	11 kDa	22722000	26110000	17027000	60615000	45836000	37956000	12807000	10840000	18152000	34616000	26301000	49435000	8398100	22750000	22035000	12729000	17902000	39817000	35682000	12741000	16533000
Protein translocase subunit SecY OS=Escherichia coli (strain K12) OX=83333 GN=secY PE=1 SV=1	P0AGA2	secY	49 kDa	0	0	12799000	132080000	87010000	75825000	28732000	15828000	35681000	72934000	31427000	85586000	0	14106000	17848000	0	21706000	42206000	55842000	0	38522000
Phosphoserine phosphatase OS=Escherichia coli (strain K12) OX=83333 GN=serB PE=1 SV=1	P0AGB0	serB	35 kDa	0	0	0	0	27963000	25399000	0	0	0	24891000	33889000	20378000	0	0	0	11461000	47544000	14784000	3435800	9706400	31179000
ECF RNA polymerase sigma-E factor OS=Escherichia coli (strain K12) OX=83333 GN=rpoE PE=1 SV=1	P0AGB6	rpoE	22 kDa	20687000	51058000	44469000	24974000	20385000	17578000	9684000	10934000	12636000	0	10249000	14355000	0	10186000	13985000	0	0	87177000	0	0	0
Soluble lytic murein transglycosylase OS=Escherichia coli (strain K12) OX=83333 GN=slt PE=1 SV=1	P0AGC3	slt	73 kDa	53967000	55962000	63358000	34175000	23594000	26455000	24129000	20225000	30413000	18797000	25785000	23123000	22675000	35918000	30281000	31587000	38662000	31149000	31876000	25124000	27006000
Superoxide dismutase [Cu-Zn] OS=Escherichia coli (strain K12) OX=83333 GN=sodC PE=1 SV=1	P0AGD1	sodC	18 kDa	177060000	203300000	158850000	408710000	317430000	262970000	54732000	68483000	72049000	93865000	66260000	83565000	6043400	0	2526600	0	1941000	2955900	3365100	2308600	0
Superoxide dismutase [Fe] OS=Escherichia coli (strain K12) OX=83333 GN=sodB PE=1 SV=2	P0AGD3	sodB	21 kDa	3040500000	3371900000	2659600000	7333200000	6477600000	5108100000	3827000000	3524500000	3493300000	8426300000	5212500000	6141200000	5894000000	7506600000	5906100000	17944000000	17849000000	18581000000	17802000000	19680000000	16225000000
Signal recognition particle protein OS=Escherichia coli (strain K12) OX=83333 GN=ffh PE=1 SV=1	P0AGD7	ffh	50 kDa	67704000	96320000	69172000	171640000	85240000	94689000	30083000	13253000	34781000	56750000	73143000	96714000	30799000	49159000	21408000	84180000	89293000	80145000	51290000	48900000	46669000
Single-stranded DNA-binding protein OS=Escherichia coli (strain K12) OX=83333 GN=ssb PE=1 SV=2	P0AGE0	ssb	19 kDa	694600000	808610000	621400000	906530000	711830000	545720000	310580000	258740000	321670000	458140000	426920000	434240000	430350000	597470000	526320000	677500000	751140000	835360000	762520000	649510000	619720000
Quinone reductase OS=Escherichia coli (strain K12) OX=83333 GN=chrR PE=1 SV=1	P0AGE6	chrR	20 kDa	727360000	644500000	740310000	361120000	172770000	237080000	250440000	283870000	182450000	213140000	169450000	61065000	260840000	495890000	264940000	385060000	122690000	73850000	111820000	326270000	93256000
Succinate--CoA ligase [ADP-forming] subunit alpha OS=Escherichia coli (strain K12) OX=83333 GN=sucD PE=1 SV=2	P0AGE9	sucD	30 kDa	3463000000	3714600000	3518600000	2227200000	1313800000	1231700000	436680000	355830000	447310000	467720000	360260000	460850000	7556900000	11335000000	8534700000	5988100000	5660700000	10241000000	4411000000	4429900000	4920900000
Sulfur acceptor protein CsdE OS=Escherichia coli (strain K12) OX=83333 GN=csdE PE=1 SV=1	P0AGF2	csdE	16 kDa	34274000	58947000	44615000	39092000	19155000	1317700	19578000	17392000	26831000	9430200	0	6208500	21865000	32903000	24772000	25560000	19874000	17229000	15544000	17436000	13988000
L-threonine dehydratase catabolic TdcB OS=Escherichia coli (strain K12) OX=83333 GN=tdcB PE=1 SV=1	P0AGF6	tdcB	35 kDa	0	0	32058000	0	0	0	0	0	0	66607000	64065000	49167000	0	0	0	41582000	0	6318100	205250000	74005000	54446000
Thiamine-monophosphate kinase OS=Escherichia coli (strain K12) OX=83333 GN=thiL PE=1 SV=1	P0AGG0	thiL	35 kDa	8003500	10676000	28898000	24513000	19822000	16775000	5368100	0	4729200	19415000	55509000	55378000	2072800	0	3243500	41441000	39727000	16926000	51861000	41880000	46136000
Acyl-CoA thioesterase 2 OS=Escherichia coli (strain K12) OX=83333 GN=tesB PE=1 SV=2	P0AGG2	tesB	32 kDa	316560000	173010000	213350000	142050000	47372000	125540000	38696000	84356000	24335000	78400000	73368000	84123000	84038000	74802000	88621000	160550000	129930000	85779000	56863000	116220000	85751000
Thioredoxin 2 OS=Escherichia coli (strain K12) OX=83333 GN=trxC PE=1 SV=1	P0AGG4	trxC	16 kDa	122750000	80590000	88075000	76082000	67003000	55836000	116730000	91575000	123720000	17337000	39119000	24174000	142780000	239370000	193700000	41701000	43712000	97214000	29989000	63670000	27673000
Metalloprotease TldD OS=Escherichia coli (strain K12) OX=83333 GN=tldD PE=1 SV=1	P0AGG8	tldD	51 kDa	184710000	261500000	186910000	218220000	143650000	131890000	93431000	90081000	116620000	81002000	66384000	72225000	88287000	130740000	85616000	79176000	76030000	103980000	70649000	34539000	60957000
Trk system potassium uptake protein TrkA OS=Escherichia coli (strain K12) OX=83333 GN=trkA PE=1 SV=1	P0AGI8	trkA	50 kDa	18947000	7985200	5137000	8423500	14374000	9571600	0	0	0	0	0	0	0	0	0	0	0	0	0	0	0
tRNA (guanosine(18)-2'-O)-methyltransferase OS=Escherichia coli (strain K12) OX=83333 GN=trmH PE=1 SV=1	P0AGJ2	trmH	25 kDa	30790000	27121000	41911000	32065000	24453000	14286000	19107000	26203000	27496000	34773000	19349000	34209000	19876000	24906000	22861000	45649000	30994000	41524000	22475000	41144000	20125000
Uncharacterized tRNA/rRNA methyltransferase YfiF OS=Escherichia coli (strain K12) OX=83333 GN=yfiF PE=1 SV=1	P0AGJ5	yfiF	38 kDa	394740000	270480000	262330000	514490000	357610000	292520000	372650000	336050000	395070000	209310000	143770000	154760000	119010000	249140000	335240000	165860000	252530000	206800000	143370000	471760000	292270000
tRNA (cytidine(34)-2'-O)-methyltransferase OS=Escherichia coli (strain K12) OX=83333 GN=trmL PE=1 SV=1	P0AGJ7	trmL	18 kDa	28190000	23052000	10288000	21020000	32581000	27256000	8712700	18131000	18691000	6089700	11936000	2734800	19095000	8680800	5787200	10115000	15730000	8602400	9949800	32131000	23721000
Tyrosine--tRNA ligase OS=Escherichia coli (strain K12) OX=83333 GN=tyrS PE=1 SV=2	P0AGJ9	tyrS	48 kDa	1262200000	1027900000	1048900000	1283600000	795720000	887180000	992170000	664690000	763870000	1108400000	824640000	1059700000	581840000	1101600000	694420000	940140000	910920000	1017600000	702660000	980930000	645320000
RNA-binding protein YhbY OS=Escherichia coli (strain K12) OX=83333 GN=yhbY PE=1 SV=1	P0AGK4	yhbY	11 kDa	164130000	207860000	138640000	144350000	94966000	87451000	112950000	113640000	128580000	89131000	59817000	115970000	117530000	148090000	116090000	89047000	152840000	53738000	93883000	95731000	48358000
HTH-type transcriptional regulator IscR OS=Escherichia coli (strain K12) OX=83333 GN=iscR PE=1 SV=1	P0AGK8	iscR	17 kDa	1428800000	904780000	1994600000	76199000	17819000	59115000	864350000	1077500000	1579100000	55051000	49846000	88217000	869280000	1787100000	779930000	0	0	0	18952000	6981300	0
Putative reactive intermediate deaminase TdcF OS=Escherichia coli (strain K12) OX=83333 GN=tdcF PE=1 SV=1	P0AGL2	tdcF	14 kDa	526990000	832210000	608010000	686090000	577280000	446050000	223460000	192460000	174200000	709240000	592120000	636990000	503040000	838580000	594470000	1075200000	1110100000	1051200000	1241600000	1352900000	1227800000
Ribosome association toxin RatA OS=Escherichia coli (strain K12) OX=83333 GN=ratA PE=1 SV=1	P0AGL5	ratA	18 kDa	0	3091700	0	28173000	19347000	17056000	0	0	0	18270000	18055000	19176000	0	0	0	16889000	17717000	17608000	17972000	5550200	19471000
Ribosomal RNA small subunit methyltransferase E OS=Escherichia coli (strain K12) OX=83333 GN=rsmE PE=1 SV=1	P0AGL7	rsmE	27 kDa	46840000	19547000	61169000	39810000	17780000	33064000	39368000	43572000	36273000	71304000	30617000	40400000	11771000	65945000	31670000	45109000	9764500	21611000	31870000	36331000	42186000
Large ribosomal subunit protein uL18 OS=Escherichia coli (strain K12) OX=83333 GN=rplR PE=1 SV=1	P0C018	rplR	13 kDa	2524000000	2882600000	2447000000	2927700000	2782700000	2695500000	3782200000	3404300000	4693800000	2653700000	2429800000	2200500000	3307600000	3225300000	3391900000	2086600000	2206900000	2101500000	2269300000	2369400000	2203400000
Pyrimidine/purine nucleoside phosphorylase OS=Escherichia coli (strain K12) OX=83333 GN=ppnP PE=1 SV=1	P0C037	ppnP	10 kDa	264670000	291830000	118520000	198430000	150940000	113880000	263160000	258840000	267220000	75570000	52176000	74579000	352360000	460740000	183890000	287040000	261680000	380870000	204420000	237990000	209170000
Small heat shock protein IbpA OS=Escherichia coli (strain K12) OX=83333 GN=ibpA PE=1 SV=1	P0C054	ibpA	16 kDa	0	0	0	0	24099000	18215000	0	0	8226800	0	10158000	26551000	0	0	18803000	12792000	63233000	15217000	0	14271000	0
Small heat shock protein IbpB OS=Escherichia coli (strain K12) OX=83333 GN=ibpB PE=1 SV=1	P0C058	ibpB	16 kDa	7930500	5814400	4714800	2821500	3042200	0	5403100	5034100	8910900	0	0	0	14360000	13342000	8095600	13540000	10769000	9542600	0	0	0
mRNA interferase toxin RelE OS=Escherichia coli (strain K12) OX=83333 GN=relE PE=1 SV=1	P0C077	relE	11 kDa	3182400	0	3451200	9779500	9034100	5711500	0	0	0	0	3624800	2613700	0	0	0	6306300	7502500	7778300	3428200	4756400	5154200
Nucleoid occlusion factor SlmA OS=Escherichia coli (strain K12) OX=83333 GN=slmA PE=1 SV=1	P0C093	slmA	23 kDa	11347000	22105000	8697700	30406000	34271000	56309000	0	0	2526500	63986000	69195000	57355000	0	5129300	0	17266000	19098000	15893000	26833000	17066000	45922000
Stress response kinase A OS=Escherichia coli (strain K12) OX=83333 GN=srkA PE=1 SV=1	P0C0K3	srkA	38 kDa	7712700	9186600	0	21112000	24078000	13334000	0	0	3821900	11263000	8796700	14480000	0	0	0	8983600	4669600	7496200	9963800	5052200	5711800
Peroxiredoxin OsmC OS=Escherichia coli (strain K12) OX=83333 GN=osmC PE=1 SV=2	P0C0L2	osmC	15 kDa	6795900000	5823800000	4308900000	2007400000	3715200000	1058900000	2224900000	2026200000	2790500000	1294900000	713780000	1250600000	109720000	452410000	378640000	156760000	183820000	201830000	56393000	183540000	45861000
Proline/betaine transporter OS=Escherichia coli (strain K12) OX=83333 GN=proP PE=1 SV=1	P0C0L7	proP	55 kDa	21884000	29688000	19791000	54378000	46235000	32277000	7400300	5526600	6981400	13290000	7835400	7800300	0	0	0	0	2289000	2346100	2681300	0	0
Ribosomal RNA large subunit methyltransferase E OS=Escherichia coli (strain K12) OX=83333 GN=rlmE PE=1 SV=1	P0C0R7	rlmE	23 kDa	202720000	241080000	229310000	198870000	165840000	109770000	141440000	154370000	187200000	115770000	114890000	126120000	158190000	172270000	141140000	183100000	100510000	114620000	69978000	117760000	127340000
Small-conductance mechanosensitive channel OS=Escherichia coli (strain K12) OX=83333 GN=mscS PE=1 SV=1	P0C0S1	mscS	31 kDa	6622200	87259000	7623800	101280000	80571000	51768000	23193000	0	5341100	6101000	39215000	9298900	0	0	0	0	3036100	2797400	61207000	0	0
Periplasmic serine endoprotease DegP OS=Escherichia coli (strain K12) OX=83333 GN=degP PE=1 SV=1	P0C0V0	degP	49 kDa	377070000	514170000	391740000	367660000	289650000	202900000	251240000	165180000	195650000	463780000	345250000	461590000	396200000	541740000	329780000	506640000	606520000	618540000	549080000	521280000	459710000
D-tagatose-1,6-bisphosphate aldolase subunit GatY OS=Escherichia coli (strain K12) OX=83333 GN=gatY PE=1 SV=1	P0C8J6	gatY	31 kDa	53137000	54930000	27416000	982050000	599640000	484270000	29124000	28563000	25018000	1118800000	1203000000	1260100000	0	0	0	0	0	0	0	0	0
D-tagatose-1,6-bisphosphate aldolase subunit GatZ OS=Escherichia coli (strain K12) OX=83333 GN=gatZ PE=1 SV=1	P0C8J8	gatZ	47 kDa	113960000	148090000	78418000	960260000	726560000	544160000	78538000	59975000	64688000	1786300000	1546200000	1520600000	0	60122000	0	0	0	0	0	0	0
Elongation factor Tu 1 OS=Escherichia coli (strain K12) OX=83333 GN=tufA PE=1 SV=1	P0CE47 (+1)	tufA	43 kDa	39940000000	41390000000	51717000000	43465000000	39962000000	33359000000	25944000000	23858000000	32099000000	33196000000	23919000000	35532000000	24999000000	40144000000	25799000000	53127000000	49932000000	59292000000	43712000000	41893000000	36940000000
Putative lipoprotein AcfD homolog OS=Escherichia coli (strain K12) OX=83333 GN=yghJ PE=3 SV=1	P0CK95	yghJ	167 kDa	17583000	3718200000	0	5569400	8459300	6689600	0	0	0	0	0	4827300	0	37392000	0	0	0	0	2996300000	0	0
Transcriptional regulatory protein RcsB OS=Escherichia coli (strain K12) OX=83333 GN=rcsB PE=1 SV=1	P0DMC7	rcsB	24 kDa	126550000	157650000	112500000	314360000	197010000	154750000	59816000	53286000	67862000	224490000	124230000	175720000	33236000	53228000	50479000	88084000	208370000	291150000	191150000	159410000	174980000
Large ribosomal subunit assembly factor BipA OS=Escherichia coli (strain K12) OX=83333 GN=bipA PE=1 SV=1	P0DTT0	bipA	67 kDa	523010000	638100000	588020000	690610000	512160000	451690000	221790000	168250000	236830000	373580000	404170000	456060000	251270000	341870000	285100000	449510000	449560000	647780000	453560000	443680000	410520000
Endolytic peptidoglycan transglycosylase RlpA OS=Escherichia coli (strain K12) OX=83333 GN=rlpA PE=1 SV=1	P10100	rlpA	38 kDa	18103000	19784000	17055000	0	0	258490	13260000	10605000	13047000	6071400	6271800	7174100	11496000	19262000	12235000	0	0	5396600	0	4724100	0
Signal recognition particle receptor FtsY OS=Escherichia coli (strain K12) OX=83333 GN=ftsY PE=1 SV=1	P10121	ftsY	55 kDa	47942000	66332000	56386000	135810000	90941000	74444000	22132000	11247000	18891000	58573000	66075000	71920000	26587000	164390000	34729000	58889000	64334000	170380000	57313000	58523000	59661000
Glutamine transport ATP-binding protein GlnQ OS=Escherichia coli (strain K12) OX=83333 GN=glnQ PE=1 SV=1	P10346	glnQ	27 kDa	0	0	0	2664600	1932700	1878400	0	0	0	0	0	0	0	4452200	0	5949600	24320000	12309000	27621000	11759000	3304900
Enterobactin synthase component E OS=Escherichia coli (strain K12) OX=83333 GN=entE PE=1 SV=3	P10378	entE	59 kDa	16724000	12513000	8150600	0	0	0	4159300	2313900	3033300	0	0	0	0	0	0	0	0	0	0	0	0
Long-chain fatty acid transport protein OS=Escherichia coli (strain K12) OX=83333 GN=fadL PE=1 SV=5	P10384	fadL	49 kDa	0	0	0	0	0	0	0	0	0	0	0	0	0	0	0	0	0	0	0	0	0
Protein translocase subunit SecA OS=Escherichia coli (strain K12) OX=83333 GN=secA PE=1 SV=2	P10408	secA	102 kDa	188650000	286320000	185910000	430180000	303930000	265100000	94198000	77547000	101670000	307160000	298150000	325720000	88844000	159720000	116830000	306520000	320530000	379840000	328620000	291800000	318950000
Alkaline phosphatase isozyme conversion protein OS=Escherichia coli (strain K12) OX=83333 GN=iap PE=3 SV=1	P10423	iap	38 kDa	0	0	0	0	0	0	0	2306300	3960500	0	0	1164800	0	0	0	0	0	0	0	1899700	0
Lipid-A-disaccharide synthase OS=Escherichia coli (strain K12) OX=83333 GN=lpxB PE=1 SV=2	P10441	lpxB	42 kDa	6807700	5081900	4868500	14093000	5092400	10052000	0	0	0	6101800	6693200	336320000	0	0	0	4387000	4818900	6079800	8231500	0	3088400
DNA polymerase III subunit alpha OS=Escherichia coli (strain K12) OX=83333 GN=dnaE PE=1 SV=1	P10443	dnaE	130 kDa	61430000	0	107220000	3146000	10419000	20413000	37278000	0	32773000	1670400	3577000	8476500	0	41848000	44018000	3465100	33949000	28120000	4294400	5636600	3547900
Glycerophosphodiester phosphodiesterase, cytoplasmic OS=Escherichia coli (strain K12) OX=83333 GN=ugpQ PE=1 SV=1	P10908	ugpQ	27 kDa	116470000	149550000	127590000	70723000	65491000	53848000	8316500	3161800	15887000	16944000	19889000	25826000	27196000	19018000	23046000	13147000	39611000	22208000	32552000	34987000	25765000
Isocitrate dehydrogenase kinase/phosphatase OS=Escherichia coli (strain K12) OX=83333 GN=aceK PE=1 SV=2	P11071	aceK	68 kDa	0	0	0	8531000	0	11261000	0	0	25948000	0	0	0	0	0	17492000	0	13436000	0	18012000	0	0
Respiratory nitrate reductase 1 beta chain OS=Escherichia coli (strain K12) OX=83333 GN=narH PE=1 SV=3	P11349	narH	58 kDa	2517200	10628000	0	84158000	85259000	59428000	212350000	0	9777600	72825000	48409000	127400000	0	0	0	0	0	0	0	0	0
Argininosuccinate lyase OS=Escherichia coli (strain K12) OX=83333 GN=argH PE=1 SV=3	P11447	argH	50 kDa	95159000	88124000	106290000	26667000	23994000	13767000	114970000	28004000	90750000	14861000	0	17319000	8041500	17698000	0	7898900	0	4375400	0	0	2446500
Enterobactin synthase component F OS=Escherichia coli (strain K12) OX=83333 GN=entF PE=1 SV=3	P11454	entF	142 kDa	4750600	5284600	4003100	0	0	0	0	0	0	8289200	0	0	0	0	0	0	0	0	0	0	0
Cell division protein DamX OS=Escherichia coli (strain K12) OX=83333 GN=damX PE=1 SV=2	P11557	damX	46 kDa	0	0	0	22051000	1131300	18309000	18847000	10428000	15512000	824050	9004800	18612000	13899000	5372600	8244800	3599300	0	14129000	13136000	10370000	10324000
Propionate kinase OS=Escherichia coli (strain K12) OX=83333 GN=tdcD PE=1 SV=3	P11868	tdcD	43 kDa	0	0	0	0	0	0	0	0	0	0	0	0	0	0	0	0	0	0	5991500	3744600	0
Arginine--tRNA ligase OS=Escherichia coli (strain K12) OX=83333 GN=argS PE=1 SV=1	P11875	argS	65 kDa	487180000	503780000	421740000	651860000	508550000	413890000	519010000	451990000	508520000	385910000	313250000	342090000	315790000	625990000	361840000	370320000	385620000	654210000	375540000	382680000	277140000
UDP-N-acetylmuramoyl-tripeptide--D-alanyl-D-alanine ligase OS=Escherichia coli (strain K12) OX=83333 GN=murF PE=1 SV=2	P11880	murF	47 kDa	0	51107000	48989000	128500000	36920000	53203000	18314000	6831100	23003000	93628000	81109000	74750000	4650100	8459300	3882400	22605000	55676000	79046000	67657000	69808000	62812000
Chorismate synthase OS=Escherichia coli (strain K12) OX=83333 GN=aroC PE=1 SV=4	P12008	aroC	39 kDa	41883000	60766000	42146000	315710000	37404000	34261000	12901000	10232000	15369000	35021000	28752000	39275000	2154000	6833200	6913600	62101000	54891000	100550000	57633000	69807000	55853000
Molybdopterin molybdenumtransferase OS=Escherichia coli (strain K12) OX=83333 GN=moeA PE=1 SV=1	P12281	moeA	44 kDa	232170000	341310000	251670000	223000000	158080000	133080000	166190000	149700000	178090000	157150000	136180000	151820000	154620000	304020000	216320000	287300000	353860000	557250000	266650000	310690000	342070000
Uracil-DNA glycosylase OS=Escherichia coli (strain K12) OX=83333 GN=ung PE=1 SV=2	P12295	ung	26 kDa	80436000	88512000	69340000	110850000	78213000	51854000	110640000	69290000	105730000	83925000	71923000	108180000	123440000	194680000	125720000	186110000	204870000	206820000	143950000	142200000	135100000
Uridine phosphorylase OS=Escherichia coli (strain K12) OX=83333 GN=udp PE=1 SV=3	P12758	udp	27 kDa	4235600000	5256900000	4060900000	7572800000	5741100000	4261400000	3349900000	2622300000	2746600000	5572200000	6133400000	6324600000	2165400000	2666500000	2054300000	1083700000	1096700000	1390500000	1167200000	1100800000	1046100000
UPF0098 protein YbhB OS=Escherichia coli (strain K12) OX=83333 GN=ybhB PE=1 SV=2	P12994	ybhB	17 kDa	378200000	403190000	306560000	254950000	64392000	120290000	54443000	58078000	108830000	11950000	25552000	672480	40216000	19816000	16733000	20242000	22245000	19831000	15933000	26401000	21184000
Pimeloyl-[acyl-carrier protein] methyl ester esterase OS=Escherichia coli (strain K12) OX=83333 GN=bioH PE=1 SV=1	P13001	bioH	29 kDa	22460000	60745000	41692000	20949000	8687400	2396700	0	0	0	0	1971100	2465000	0	9628200	3693500	29960000	15880000	39703000	34183000	16119000	5878100
Methionine synthase OS=Escherichia coli (strain K12) OX=83333 GN=metH PE=1 SV=5	P13009	metH	136 kDa	51045000	46950000	48149000	44226000	40579000	29225000	63262000	52276000	45628000	45147000	40676000	50215000	34551000	57573000	36485000	45190000	47187000	69900000	61879000	55867000	53070000
1,6-anhydro-N-acetylmuramyl-L-alanine amidase AmpD OS=Escherichia coli (strain K12) OX=83333 GN=ampD PE=1 SV=1	P13016	ampD	21 kDa	8305300	19138000	20893000	9565800	7292600	0	22813000	18946000	7270300	13344000	4878300	25816000	8301500	25520000	8284700	33010000	29610000	43670000	36246000	34768000	26541000
Protein FdhE OS=Escherichia coli (strain K12) OX=83333 GN=fdhE PE=1 SV=2	P13024	fdhE	35 kDa	96321000	88296000	55694000	154930000	135560000	97767000	74972000	84158000	85646000	111430000	94052000	77447000	118760000	184740000	95565000	266420000	129480000	208110000	166400000	164160000	203620000
Catalase-peroxidase OS=Escherichia coli (strain K12) OX=83333 GN=katG PE=1 SV=2	P13029	katG	80 kDa	1806400000	1822100000	1698600000	3276400000	986100000	815470000	1174200000	966330000	1248800000	780970000	734280000	889290000	11234000000	15618000000	13432000000	1131200000	1446000000	1803700000	1037300000	1047300000	1089600000
Anaerobic glycerol-3-phosphate dehydrogenase subunit B OS=Escherichia coli (strain K12) OX=83333 GN=glpB PE=1 SV=1	P13033	glpB	45 kDa	0	13593000	0	237520000	178070000	124600000	0	8827000	18216000	217270000	207280000	182440000	17025000	33877000	25866000	187720000	159970000	181600000	168360000	170260000	157570000
Aerobic glycerol-3-phosphate dehydrogenase OS=Escherichia coli (strain K12) OX=83333 GN=glpD PE=1 SV=3	P13035	glpD	57 kDa	744760000	797700000	724240000	254740000	193130000	151990000	397780000	295170000	277470000	212130000	155730000	211010000	511260000	694090000	512700000	306120000	314530000	396330000	234320000	233870000	177260000
Fe(3+) dicitrate transport protein FecA OS=Escherichia coli (strain K12) OX=83333 GN=fecA PE=1 SV=2	P13036	fecA	85 kDa	0	0	0	0	0	0	12280000	1748100	1752300	2158900	0	0	0	0	0	0	0	0	0	0	0
RNA polymerase sigma factor RpoS OS=Escherichia coli (strain K12) OX=83333 GN=rpoS PE=1 SV=3	P13445	rpoS	38 kDa	130650000	151470000	132270000	212780000	146490000	137840000	3315800	4639900	29810000	58791000	81903000	54610000	0	0	0	0	0	0	0	0	0
Nuclease SbcCD subunit C OS=Escherichia coli (strain K12) OX=83333 GN=sbcC PE=1 SV=1	P13458	sbcC	119 kDa	0	0	3740400	290470000	0	0	0	0	0	0	0	0	0	0	0	1384600	0	0	4163600	0	0
Periplasmic trehalase OS=Escherichia coli (strain K12) OX=83333 GN=treA PE=1 SV=1	P13482	treA	64 kDa	193820000	220980000	188710000	116470000	83997000	105420000	41861000	39231000	41760000	36185000	38869000	28678000	0	44734000	26659000	0	0	0	0	0	8527500
Ribosomal-protein-serine acetyltransferase OS=Escherichia coli (strain K12) OX=83333 GN=rimL PE=1 SV=1	P13857	rimL	21 kDa	19766000	9650200	9929700	7992200	8982100	10944000	5283400	0	0	5210900	9203400	5431100	17289000	27460000	17479000	23068000	19862000	32574000	22286000	10970000	20812000
Selenocysteine-specific elongation factor OS=Escherichia coli (strain K12) OX=83333 GN=selB PE=1 SV=3	P14081	selB	69 kDa	75763000	80203000	53450000	76837000	65780000	56545000	28924000	25837000	20294000	61626000	49378000	50397000	17307000	35365000	19128000	40842000	37119000	70318000	46792000	37337000	33117000
Glycine betaine/proline betaine transport system ATP-binding protein ProV OS=Escherichia coli (strain K12) OX=83333 GN=proV PE=1 SV=1	P14175	proV	44 kDa	8243300	0	10940000	17431000	22349000	3822400	23092000	19238000	5040700	3757300	11647000	26393000	6587200	3953100	0	0	0	6386200	0	0	0
DNA topoisomerase 3 OS=Escherichia coli (strain K12) OX=83333 GN=topB PE=1 SV=1	P14294	topB	73 kDa	146260000	141930000	113240000	147970000	104540000	88566000	75270000	201100000	0	134170000	4648700	109790000	0	0	0	38953000	9251700	59131000	32512000	5850300	12906000
Fumarate hydratase class I, anaerobic OS=Escherichia coli (strain K12) OX=83333 GN=fumB PE=1 SV=2	P14407	fumB	60 kDa	450100000	504830000	395800000	434810000	329690000	226180000	48693000	55802000	54726000	298300000	328860000	329150000	1047100000	1570600000	1177400000	1926800000	1788300000	2108800000	962590000	1260500000	1391600000
UDP-N-acetylmuramoylalanine--D-glutamate ligase OS=Escherichia coli (strain K12) OX=83333 GN=murD PE=1 SV=3	P14900	murD	47 kDa	129730000	217560000	177440000	83938000	68547000	83042000	91518000	106570000	79920000	191260000	37225000	67400000	117630000	189160000	137060000	289900000	46242000	272410000	81299000	369410000	194620000
Type IV methyl-directed restriction enzyme EcoKMcrB subunit OS=Escherichia coli (strain K12) OX=83333 GN=mcrB PE=1 SV=3	P15005	mcrB	53 kDa	0	0	0	4139800	4069800	3922100	0	0	0	11327000	8094900	14341000	0	0	0	5478100	5801200	16653000	19239000	5846100	4052000
Fe(3+) dicitrate-binding periplasmic protein FecB OS=Escherichia coli (strain K12) OX=83333 GN=fecB PE=1 SV=3	P15028	fecB	33 kDa	7221200	6685400	15522000	9942500	12866000	10097000	10431000	0	8038000	5523100	5169700	30101000	4196300	16968000	0	7757300	0	19577000	13183000	5815600	6579900
Xaa-Pro aminopeptidase OS=Escherichia coli (strain K12) OX=83333 GN=pepP PE=1 SV=2	P15034	pepP	50 kDa	431220000	587430000	412190000	400130000	268410000	253320000	351640000	350300000	348610000	365080000	245320000	315100000	306450000	415880000	333450000	471170000	421940000	544760000	445880000	451070000	418020000
DNA helicase IV OS=Escherichia coli (strain K12) OX=83333 GN=helD PE=1 SV=2	P15038	helD	78 kDa	522830000	605140000	490160000	939390000	627950000	24795000	693880000	562910000	831120000	772350000	29686000	633900000	531350000	774410000	611840000	474850000	607710000	763720000	484190000	525990000	470390000
DNA ligase OS=Escherichia coli (strain K12) OX=83333 GN=ligA PE=1 SV=2	P15042	ligA	74 kDa	61752000	109980000	58590000	162020000	105880000	83388000	18140000	4238800	16807000	48364000	56229000	60287000	3012400	92305000	3447300	51475000	43635000	65940000	50548000	93719000	48445000
2,3-dihydro-2,3-dihydroxybenzoate dehydrogenase OS=Escherichia coli (strain K12) OX=83333 GN=entA PE=1 SV=1	P15047	entA	26 kDa	34422000	48667000	35185000	4831000	29767000	33974000	27226000	28932000	23958000	0	0	2882900	16933000	8951300	2459200	906330	2845200	5984400	0	0	0
Glycogen debranching enzyme OS=Escherichia coli (strain K12) OX=83333 GN=glgX PE=1 SV=3	P15067	glgX	74 kDa	8382100	9126900	50026000	24640000	20986000	11715000	18889000	18329000	19646000	86780000	23326000	24271000	2150700	3380700	2214200	10834000	25792000	10072000	20795000	17663000	29249000
Peptide transporter CstA OS=Escherichia coli (strain K12) OX=83333 GN=cstA PE=1 SV=3	P15078	cstA	75 kDa	0	0	0	0	0	0	0	0	0	0	0	0	0	0	0	3092800	0	12726000	7218300	0	9062400
Glucitol operon repressor OS=Escherichia coli (strain K12) OX=83333 GN=srlR PE=1 SV=1	P15082	srlR	28 kDa	9355200	16156000	7418400	13986000	12572000	0	11178000	6172900	7324300	16482000	15021000	0	7819700	10759000	7574200	29601000	30951000	35705000	23496000	6930200	28471000
Phosphoribosylformylglycinamidine synthase OS=Escherichia coli (strain K12) OX=83333 GN=purL PE=1 SV=3	P15254	purL	141 kDa	96963000	136920000	56573000	73162000	119540000	36239000	34845000	31220000	32215000	64345000	47805000	56836000	40472000	53543000	41748000	38373000	47014000	58160000	37367000	46649000	28771000
Cytosol non-specific dipeptidase OS=Escherichia coli (strain K12) OX=83333 GN=pepD PE=1 SV=3	P15288	pepD	53 kDa	2093800000	2159200000	1580500000	1284200000	999060000	896870000	805020000	1118200000	1020200000	1105900000	897730000	1006300000	1494700000	2516500000	1668300000	1796000000	1640000000	2549500000	1664900000	1456000000	1478500000
Antitoxin PrlF OS=Escherichia coli (strain K12) OX=83333 GN=prlF PE=1 SV=1	P15373	prlF	12 kDa	13742000	27571000	21313000	28916000	22128000	17766000	22916000	18117000	25111000	19410000	17329000	21375000	15110000	20483000	14939000	23964000	24667000	31571000	26052000	16230000	27552000
Bifunctional purine biosynthesis protein PurH OS=Escherichia coli (strain K12) OX=83333 GN=purH PE=1 SV=1	P15639	purH	57 kDa	118660000	138990000	111910000	121950000	60285000	43307000	42713000	34584000	41792000	69325000	51962000	82769000	56898000	78678000	57119000	58698000	67287000	80175000	59698000	50738000	49185000
Phosphoribosylamine--glycine ligase OS=Escherichia coli (strain K12) OX=83333 GN=purD PE=1 SV=2	P15640	purD	46 kDa	55426000	64710000	38645000	61085000	32957000	27637000	14235000	13288000	14547000	46271000	16378000	45513000	18416000	27800000	6171100	15560000	29762000	16987000	16437000	12546000	21840000
Deoxyguanosinetriphosphate triphosphohydrolase OS=Escherichia coli (strain K12) OX=83333 GN=dgt PE=1 SV=4	P15723	dgt	59 kDa	26252000	29156000	25490000	14603000	14012000	12037000	36121000	31450000	34520000	18385000	12648000	10802000	28738000	37635000	22511000	18161000	20702000	24946000	9014700	16980000	14075000
Shikimate dehydrogenase (NADP(+)) OS=Escherichia coli (strain K12) OX=83333 GN=aroE PE=1 SV=1	P15770	aroE	29 kDa	0	0	59495000	14861000	50994000	5909900	0	0	0	10588000	49967000	0	0	11630000	5033600	9079400	14713000	16613000	14973000	35858000	12410000
Quinoprotein glucose dehydrogenase OS=Escherichia coli (strain K12) OX=83333 GN=gcd PE=1 SV=3	P15877	gcd	87 kDa	2550700	0	0	0	0	7688900	0	0	0	0	0	0	0	0	0	0	0	0	0	0	0
4-alpha-glucanotransferase OS=Escherichia coli (strain K12) OX=83333 GN=malQ PE=1 SV=2	P15977	malQ	79 kDa	79260000	104040000	80161000	291640000	225370000	202530000	14518000	12094000	22281000	225950000	183160000	201210000	9885800	0	0	92623000	151980000	130040000	79741000	77299000	105430000
L-serine dehydratase 1 OS=Escherichia coli (strain K12) OX=83333 GN=sdaA PE=1 SV=3	P16095	sdaA	49 kDa	165910000	182590000	162020000	368270000	248240000	209190000	92448000	59071000	81636000	186400000	156690000	196680000	75409000	93980000	85295000	240630000	216320000	335220000	313450000	322120000	283270000
tRNA dimethylallyltransferase OS=Escherichia coli (strain K12) OX=83333 GN=miaA PE=1 SV=2	P16384	miaA	35 kDa	8551600	4036500	11129000	18892000	16295000	13017000	1526700	0	0	5585800	11552000	13029000	0	4473700	0	4184800	5633900	0	4679100	14874000	13987000
Selenide, water dikinase OS=Escherichia coli (strain K12) OX=83333 GN=selD PE=1 SV=1	P16456	selD	37 kDa	180480000	251180000	194580000	392310000	296650000	236840000	161580000	140680000	123070000	296700000	276440000	351680000	146470000	186210000	145540000	373030000	466630000	540180000	409790000	374890000	325280000
DNA replication terminus site-binding protein OS=Escherichia coli (strain K12) OX=83333 GN=tus PE=1 SV=1	P16525	tus	36 kDa	5644600	0	0	20787000	4835000	0	0	0	0	0	6457500	0	0	0	0	3858100	0	0	0	0	0
Transcriptional repressor IclR OS=Escherichia coli (strain K12) OX=83333 GN=iclR PE=1 SV=1	P16528	iclR	30 kDa	6568100	0	9359400	0	3548100	4661800	2074500	0	2046600	2417900	0	3566600	29825000	43100000	32404000	41862000	24198000	49224000	37441000	34828000	33462000
Proline--tRNA ligase OS=Escherichia coli (strain K12) OX=83333 GN=proS PE=1 SV=4	P16659	proS	64 kDa	1117400000	1049000000	911280000	1098000000	612990000	609880000	842650000	800400000	1024200000	793120000	543450000	602720000	1148900000	1504700000	973250000	1208500000	1306800000	1424000000	1142800000	1223000000	821600000
Sulfate/thiosulfate import ATP-binding protein CysA OS=Escherichia coli (strain K12) OX=83333 GN=cysA PE=1 SV=2	P16676	cysA	41 kDa	4225800	8133400	4501400	0	0	0	0	0	0	0	0	0	0	0	0	0	0	0	0	0	0
Protein YjdN OS=Escherichia coli (strain K12) OX=83333 GN=yjdN PE=4 SV=1	P16681	yjdN	16 kDa	45171000	46884000	31741000	40040000	22266000	30114000	14062000	4461700	17745000	0	5723000	0	0	0	0	0	0	0	0	0	0
Thiosulfate-binding protein OS=Escherichia coli (strain K12) OX=83333 GN=cysP PE=1 SV=1	P16700	cysP	38 kDa	381610000	386540000	384300000	52294000	38325000	29274000	261200000	209040000	224530000	25124000	8233100	10133000	180190000	111830000	131690000	118280000	81487000	172080000	7518400	21221000	15793000
Cysteine synthase B OS=Escherichia coli (strain K12) OX=83333 GN=cysM PE=1 SV=1	P16703	cysM	33 kDa	88410000	130480000	81891000	33287000	11687000	20052000	64320000	79025000	58111000	14176000	14144000	10613000	53527000	53841000	15427000	33848000	14414000	49784000	12640000	17935000	16335000
Cell shape-determining protein MreC OS=Escherichia coli (strain K12) OX=83333 GN=mreC PE=1 SV=1	P16926	mreC	40 kDa	0	0	0	0	0	0	944900	0	2383000	0	0	0	980980	0	0	0	0	0	0	0	0
2-succinyl-5-enolpyruvyl-6-hydroxy-3-cyclohexene-1-carboxylate synthase OS=Escherichia coli (strain K12) OX=83333 GN=menD PE=1 SV=4	P17109	menD	61 kDa	0	0	0	6067900	0	4782700	0	0	0	17227000	14512000	24708000	0	0	0	14740000	7054500	8389000	9059600	17438000	5937300
Arabinose 5-phosphate isomerase GutQ OS=Escherichia coli (strain K12) OX=83333 GN=gutQ PE=1 SV=3	P17115	gutQ	34 kDa	89954000	129850000	78386000	75852000	61037000	50274000	48463000	45477000	56820000	70405000	74221000	69976000	56307000	75251000	64417000	106910000	150200000	120620000	128670000	138270000	88803000
Oxygen-insensitive NADPH nitroreductase OS=Escherichia coli (strain K12) OX=83333 GN=nfsA PE=1 SV=2	P17117	nfsA	27 kDa	456740000	370850000	484160000	198530000	135210000	144170000	562460000	313750000	313500000	228060000	216660000	268100000	289390000	387190000	305890000	536200000	370860000	614370000	345140000	486060000	454690000
Glutamine--fructose-6-phosphate aminotransferase [isomerizing] OS=Escherichia coli (strain K12) OX=83333 GN=glmS PE=1 SV=4	P17169	glmS	67 kDa	1523800000	1194100000	1050000000	1332200000	1082500000	554420000	669770000	541340000	820520000	846980000	650190000	661410000	936540000	1177700000	936650000	1159300000	959940000	1473500000	777110000	821300000	1520100000
UDP-N-acetylglucosamine--N-acetylmuramyl-(pentapeptide) pyrophosphoryl-undecaprenol N-acetylglucosamine transferase OS=Escherichia coli (strain K12) OX=83333 GN=murG PE=1 SV=3	P17443	murG	38 kDa	0	3601200	3795900	11299000000	2585200	8785100	0	0	0	1872800	0	8415800	0	0	4462900	13072000000	1534900000	16775000000	8277500	0	0
Betaine aldehyde dehydrogenase OS=Escherichia coli (strain K12) OX=83333 GN=betB PE=1 SV=3	P17445	betB	53 kDa	434910000	292910000	412990000	193630000	78374000	130210000	138050000	431220000	119650000	54054000	50898000	14920000	146780000	182300000	448680000	45316000	50645000	72786000	33081000	36992000	35499000
HTH-type transcriptional regulator BetI OS=Escherichia coli (strain K12) OX=83333 GN=betI PE=2 SV=1	P17446	betI	22 kDa	14200000	7416500	6471400	0	0	2066400	0	0	0	0	0	0	0	0	1761200	0	0	0	0	0	0
Adenine DNA glycosylase OS=Escherichia coli (strain K12) OX=83333 GN=mutY PE=1 SV=1	P17802	mutY	39 kDa	4160600	0	0	5502800	3391000	3416700	0	0	0	4422600	6641700	3920900	4729300	9240400	4734500	10347000	17518000	14534000	13736000	9135500	8039800
Sulfite reductase [NADPH] hemoprotein beta-component OS=Escherichia coli (strain K12) OX=83333 GN=cysI PE=1 SV=4	P17846	cysI	64 kDa	298440000	321220000	249640000	57352000	39083000	31456000	161120000	96576000	77468000	20851000	14702000	10470000	48246000	131680000	69272000	43182000	84769000	188910000	15375000	18268000	17953000
Phosphoadenosine 5'-phosphosulfate reductase OS=Escherichia coli (strain K12) OX=83333 GN=cysH PE=1 SV=3	P17854	cysH	28 kDa	76596000	112110000	70911000	6580200	10227000	8387800	18565000	14617000	35175000	0	0	0	0	17504000	5298200	0	2158500	40361000	0	0	0
Primosomal protein N' OS=Escherichia coli (strain K12) OX=83333 GN=priA PE=1 SV=2	P17888	priA	82 kDa	0	0	0	0	0	0	0	0	0	0	2280000	0	0	0	0	2186100	0	0	6984600	1722500	0
UDP-N-acetylmuramate--L-alanine ligase OS=Escherichia coli (strain K12) OX=83333 GN=murC PE=1 SV=2	P17952	murC	54 kDa	73664000	93015000	55249000	43528000	96660000	70600000	23339000	10610000	30618000	61445000	54801000	66649000	29351000	41180000	21170000	62189000	55828000	77158000	243650000	48170000	230960000
Ubiquinone biosynthesis O-methyltransferase OS=Escherichia coli (strain K12) OX=83333 GN=ubiG PE=1 SV=1	P17993	ubiG	27 kDa	129990000	135610000	128770000	161580000	123850000	123200000	86816000	134320000	79866000	232940000	152280000	123600000	66003000	124190000	63857000	175630000	117890000	209040000	153090000	226060000	211010000
Nicotinate phosphoribosyltransferase OS=Escherichia coli (strain K12) OX=83333 GN=pncB PE=1 SV=3	P18133	pncB	46 kDa	9933100	21461000	13392000	12088000	13472000	17075000	0	3108900	3980800	14860000	14772000	12519000	17711000	0	3801600	28861000	0	22585000	25827000	16563000	11325000
Septum site-determining protein MinC OS=Escherichia coli (strain K12) OX=83333 GN=minC PE=1 SV=1	P18196	minC	25 kDa	271350000	3787000	376540000	44536000	21030000	13000000	0	0	0	15102000	501060000	31749000	0	190140000	0	19161000	28991000	708760000	31261000	469640000	39721000
Acetylornithine/succinyldiaminopimelate aminotransferase OS=Escherichia coli (strain K12) OX=83333 GN=argD PE=1 SV=4	P18335	argD	44 kDa	34740000	37922000	57660000	29235000	22675000	16352000	29974000	26789000	35384000	41192000	16714000	31373000	24810000	37511000	25748000	17692000	22039000	37993000	22439000	31246000	27650000
Uncharacterized protein YjjA OS=Escherichia coli (strain K12) OX=83333 GN=yjjA PE=3 SV=3	P18390	yjjA	17 kDa	0	0	0	0	0	6607000	10781000	0	0	7108600	0	0	13664000	27011000	10215000	9383100	20860000	0	32248000	9355300	5685100
Dimethyl sulfoxide reductase DmsA OS=Escherichia coli (strain K12) OX=83333 GN=dmsA PE=1 SV=2	P18775	dmsA	90 kDa	0	0	0	63926000	48791000	37807000	0	0	0	92873000	86586000	75371000	0	0	0	0	0	0	0	0	0
Anaerobic dimethyl sulfoxide reductase chain B OS=Escherichia coli (strain K12) OX=83333 GN=dmsB PE=1 SV=4	P18776	dmsB	23 kDa	0	0	0	13322000	19960000	16805000	0	0	0	31999000	26041000	28519000	0	0	0	0	0	0	0	0	0
NH(3)-dependent NAD(+) synthetase OS=Escherichia coli (strain K12) OX=83333 GN=nadE PE=1 SV=2	P18843	nadE	31 kDa	683500000	849780000	627800000	637870000	375580000	329670000	467110000	411720000	452910000	365310000	283230000	331490000	239950000	332680000	269760000	202020000	251010000	251380000	168340000	211320000	221420000
Glutathione hydrolase proenzyme OS=Escherichia coli (strain K12) OX=83333 GN=ggt PE=1 SV=1	P18956	ggt	62 kDa	55727000	125950000	51111000	0	4826000	5479300	0	0	3325000	70181000	0	0	0	0	0	0	0	0	0	0	0
Respiratory nitrate reductase 2 beta chain OS=Escherichia coli (strain K12) OX=83333 GN=narY PE=1 SV=2	P19318	narY	59 kDa	0	21897000	0	47370000	85259000	51544000	0	0	0	55291000	34752000	119200000	0	0	0	9839400	0	14145000	0	0	12638000
4-hydroxythreonine-4-phosphate dehydrogenase OS=Escherichia coli (strain K12) OX=83333 GN=pdxA PE=1 SV=1	P19624	pdxA	35 kDa	36795000	30332000	21265000	25166000	15111000	11020000	19857000	18978000	18436000	13538000	8984900	30932000	12650000	10312000	6049500	29062000	12283000	14524000	8174900	19487000	26538000
Ethanolamine ammonia-lyase small subunit OS=Escherichia coli (strain K12) OX=83333 GN=eutC PE=1 SV=2	P19636	eutC	32 kDa	0	0	0	0	3607000	0	0	0	0	0	3161700	0	0	0	0	0	0	0	0	0	0
Glucose-1-phosphatase OS=Escherichia coli (strain K12) OX=83333 GN=agp PE=1 SV=1	P19926	agp	46 kDa	127690000	141300000	131480000	151350000	145630000	95681000	68350000	67120000	57679000	136710000	95346000	93642000	525390000	588940000	419580000	768020000	801800000	1011300000	659740000	730210000	636430000
Tol-Pal system protein TolA OS=Escherichia coli (strain K12) OX=83333 GN=tolA PE=1 SV=1	P19934	tolA	43 kDa	3871400	0	0	0	0	0	4526300	4313100	4199300	0	0	3982900	6123900	12996000	0	0	0	0	0	0	0
DNA topoisomerase 4 subunit B OS=Escherichia coli (strain K12) OX=83333 GN=parE PE=1 SV=3	P20083	parE	70 kDa	64308000	58355000	43815000	77804000	65406000	63257000	10939000	14960000	19665000	50557000	36772000	59316000	18634000	23925000	11268000	47051000	77224000	70778000	59585000	45527000	71843000
Biotin sulfoxide reductase OS=Escherichia coli (strain K12) OX=83333 GN=bisC PE=1 SV=3	P20099	bisC	86 kDa	35915000	36667000	22909000	8161500	11420000	9529100	27972000	17003000	16689000	15889000	12448000	15514000	14416000	26972000	16636000	22391000	16239000	17907000	20465000	17714000	17160000
Probable protein adenylyltransferase Fic OS=Escherichia coli (strain K12) OX=83333 GN=fic PE=1 SV=1	P20605	fic	23 kDa	86425000	48622000	30100000	138940000	99711000	40316000	5875900	8901200	0	12022000	9451200	30987000	0	0	0	0	0	0	0	0	0
PTS system fructose-specific EIIB'BC component OS=Escherichia coli (strain K12) OX=83333 GN=fruA PE=1 SV=1	P20966	fruA	58 kDa	14039000	20521000	11551000	23236000	18365000	14332000	29378000	28281000	37241000	13732000	4490400	12012000	13969000	11622000	7501000	2098300	5573700	7032900	5274700	0	2885400
3-ketoacyl-CoA thiolase FadA OS=Escherichia coli (strain K12) OX=83333 GN=fadA PE=1 SV=3	P21151	fadA	41 kDa	14469000	22299000	12546000	47735000	37931000	26349000	0	0	0	0	0	0	34748000	32386000	27814000	42058000	62232000	107090000	31362000	16841000	27821000
Sulfate adenylyltransferase subunit 2 OS=Escherichia coli (strain K12) OX=83333 GN=cysD PE=1 SV=3	P21156	cysD	35 kDa	95911000	183050000	85058000	3871300	0	3533800	24295000	18265000	18959000	0	0	0	3141800	7494700	3449400	0	6125100	30343000	0	0	0
Xaa-Pro dipeptidase OS=Escherichia coli (strain K12) OX=83333 GN=pepQ PE=1 SV=2	P21165	pepQ	50 kDa	916750000	1029600000	968600000	901790000	720570000	604660000	524990000	523390000	502590000	390530000	355630000	373450000	811100000	970430000	752900000	808200000	938850000	1124300000	844110000	835300000	704780000
Constitutive ornithine decarboxylase OS=Escherichia coli (strain K12) OX=83333 GN=speC PE=1 SV=2	P21169	speC	79 kDa	9411500	6780200	11861000	18636000	11956000	15734000	18431000	22034000	0	33369000	30889000	25930000	2709900	15473000	8694600	31849000	26706000	33638000	27799000	34352000	26766000
Biosynthetic arginine decarboxylase OS=Escherichia coli (strain K12) OX=83333 GN=speA PE=1 SV=2	P21170	speA	74 kDa	542730000	511230000	482420000	767480000	517430000	440890000	292070000	231390000	244080000	475930000	401820000	375220000	298560000	501950000	322980000	334030000	988470000	472900000	847520000	787720000	923530000
Fatty acid oxidation complex subunit alpha OS=Escherichia coli (strain K12) OX=83333 GN=fadB PE=1 SV=2	P21177	fadB	80 kDa	35381000	32888000	7048500	103740000	95368000	52037000	0	0	0	0	0	0	82101000	167330000	110070000	111910000	149460000	191380000	59073000	34556000	39203000
Catalase HPII OS=Escherichia coli (strain K12) OX=83333 GN=katE PE=1 SV=1	P21179	katE	84 kDa	1745800000	1605000000	1787100000	841550000	826430000	674320000	208440000	149400000	171890000	150150000	144900000	151780000	4363900	5096300	2958900	109160000	76306000	13021000	113950000	17792000	15598000
DNA polymerase II OS=Escherichia coli (strain K12) OX=83333 GN=polB PE=1 SV=2	P21189	polB	90 kDa	2514300	0	0	0	3206400	2702700	0	0	3119900	4759100	0	12987000	0	0	1603300	4342500	0	0	0	5804200	6030800
Ribonuclease I OS=Escherichia coli (strain K12) OX=83333 GN=rna PE=1 SV=1	P21338	rna	30 kDa	35084000	17681000	50260000	13468000	0	0	53072000	35642000	59298000	8332200	5754900	10227000	49171000	51782000	48390000	4342000	10051000	22315000	13326000	8289800	2575500
Protein YciF OS=Escherichia coli (strain K12) OX=83333 GN=yciF PE=1 SV=1	P21362	yciF	19 kDa	82324000	0	95750000	117690000	91749000	75565000	0	0	0	0	0	0	0	0	0	0	0	0	0	0	0
Protein YciE OS=Escherichia coli (strain K12) OX=83333 GN=yciE PE=1 SV=1	P21363	yciE	19 kDa	41573000	70397000	112530000	1391500	86652000	48212000	0	0	0	0	0	0	0	0	0	0	0	0	0	0	0
Probable hydrolase YcaC OS=Escherichia coli (strain K12) OX=83333 GN=ycaC PE=1 SV=1	P21367	ycaC	23 kDa	1042400000	1288700000	1073000000	358880000	310100000	270960000	111220000	110150000	139010000	67938000	73511000	96273000	6721000	0	7326000	0	5662800	0	7369600	9367700	10135000
Nicotinamidase OS=Escherichia coli (strain K12) OX=83333 GN=pncA PE=1 SV=1	P21369	pncA	23 kDa	51333000	22482000	0	11514000	11387000	7756900	11234000	13703000	29035000	53183000	42912000	41152000	17340000	13535000	25247000	51429000	12876000	71978000	62159000	87790000	73940000
Putative outer membrane porin protein NmpC OS=Escherichia coli (strain K12) OX=83333 GN=nmpC PE=5 SV=2	P21420	nmpC	40 kDa	0	0	0	0	0	0	2287200	0	6499800	0	0	0	0	0	0	0	30447000	36026000	37599000	0	32199000
Ribonuclease R OS=Escherichia coli (strain K12) OX=83333 GN=rnr PE=1 SV=2	P21499	rnr	92 kDa	275490000	299250000	273650000	378650000	245880000	183620000	181920000	173900000	192630000	207020000	180520000	232330000	228700000	299280000	202810000	295670000	287720000	375040000	319030000	305050000	265060000
ATP-dependent RNA helicase SrmB OS=Escherichia coli (strain K12) OX=83333 GN=srmB PE=1 SV=1	P21507	srmB	50 kDa	170860000	142050000	136970000	227050000	131460000	147420000	153090000	111400000	108520000	159800000	100800000	142610000	106380000	286080000	136750000	219790000	251640000	242160000	131390000	167980000	190670000
Ribonuclease E OS=Escherichia coli (strain K12) OX=83333 GN=rne PE=1 SV=6	P21513	rne	118 kDa	266220000	267920000	200550000	238630000	218750000	180510000	173360000	145920000	218990000	149400000	146060000	185550000	199750000	347550000	230100000	252320000	205920000	308780000	252570000	210150000	213960000
Cyclic di-GMP phosphodiesterase PdeL OS=Escherichia coli (strain K12) OX=83333 GN=pdeL PE=1 SV=2	P21514	pdeL	41 kDa	0	0	0	23269000	0	0	0	0	0	0	0	3555900	0	0	0	0	0	0	0	0	0
Maltodextrin glucosidase OS=Escherichia coli (strain K12) OX=83333 GN=malZ PE=1 SV=5	P21517	malZ	69 kDa	19481000	9451200	16424000	0	0	15734000	2286300	2024500	2743500	0	0	3478300	0	0	0	0	0	8438300	0	0	2501900
Pyruvate kinase II OS=Escherichia coli (strain K12) OX=83333 GN=pykA PE=1 SV=3	P21599	pykA	51 kDa	2366800000	1760500000	2327600000	2543200000	2284800000	1591900000	1491800000	1281700000	1472200000	2327900000	2693200000	2673800000	1555600000	1524100000	1881400000	2292100000	1846900000	1865600000	1362700000	1575400000	1603100000
UDP-3-O-(3-hydroxymyristoyl)glucosamine N-acyltransferase OS=Escherichia coli (strain K12) OX=83333 GN=lpxD PE=1 SV=2	P21645	lpxD	36 kDa	149170000	154490000	140390000	229230000	157310000	106440000	132840000	110500000	134660000	135360000	108190000	135960000	118900000	168220000	104310000	138850000	120810000	162980000	141640000	107440000	129660000
Pyridoxal phosphate phosphatase YbhA OS=Escherichia coli (strain K12) OX=83333 GN=ybhA PE=1 SV=3	P21829	ybhA	30 kDa	37401000	52809000	37812000	71599000	40941000	43960000	21942000	16842000	20144000	47207000	45045000	65653000	5471800	4114000	0	70960000	68639000	57897000	104690000	64061000	66925000
Cysteine--tRNA ligase OS=Escherichia coli (strain K12) OX=83333 GN=cysS PE=1 SV=2	P21888	cysS	52 kDa	262610000	312100000	272600000	341430000	257340000	207100000	260940000	285160000	247910000	303900000	292320000	288130000	299170000	367100000	314220000	339960000	318730000	489090000	351390000	376970000	295380000
Aspartate--tRNA ligase OS=Escherichia coli (strain K12) OX=83333 GN=aspS PE=1 SV=1	P21889	aspS	66 kDa	1122800000	1183700000	1160900000	1361900000	943130000	633530000	1514600000	1147000000	1304100000	1507600000	995190000	1148200000	720670000	939940000	1317200000	1168000000	1141000000	1140800000	974690000	1152600000	686370000
Single-stranded-DNA-specific exonuclease RecJ OS=Escherichia coli (strain K12) OX=83333 GN=recJ PE=1 SV=2	P21893	recJ	63 kDa	5839900	5120800	40863000	44912000	24207000	9987400	6339600	10420000	21070000	13380000	14753000	13211000	0	0	0	6085900	14349000	20927000	9796800	8710100	14532000
Asparagine synthetase B [glutamine-hydrolyzing] OS=Escherichia coli (strain K12) OX=83333 GN=asnB PE=1 SV=3	P22106	asnB	63 kDa	61330000	57855000	44359000	68988000	49446000	53263000	10349000	12109000	11096000	33501000	42856000	39131000	24242000	41740000	26924000	75567000	87564000	136980000	75098000	79812000	67175000
Transcriptional regulator MraZ OS=Escherichia coli (strain K12) OX=83333 GN=mraZ PE=1 SV=1	P22186	mraZ	17 kDa	16594000	12552000	17352000	5414300	0	4659600	18707000	17944000	19695000	3747300	3945500	0	20624000	20790000	19391000	19082000	15738000	25023000	7595100	13343000	14023000
UDP-N-acetylmuramoyl-L-alanyl-D-glutamate--2,6-diaminopimelate ligase OS=Escherichia coli (strain K12) OX=83333 GN=murE PE=1 SV=2	P22188	murE	53 kDa	145890000	164040000	170470000	223500000	180330000	148610000	85498000	81243000	74237000	90724000	78072000	141790000	108620000	135480000	83148000	205590000	156940000	212540000	181660000	215650000	176860000
3'(2'),5'-bisphosphate nucleotidase CysQ OS=Escherichia coli (strain K12) OX=83333 GN=cysQ PE=1 SV=2	P22255	cysQ	27 kDa	184200000	200480000	172720000	246160000	172070000	174030000	72636000	72371000	87682000	122020000	120290000	133390000	57298000	72914000	50342000	77213000	63471000	177180000	84786000	92565000	82319000
4-aminobutyrate aminotransferase GabT OS=Escherichia coli (strain K12) OX=83333 GN=gabT PE=1 SV=1	P22256	gabT	46 kDa	1140100000	1262100000	1114800000	726990000	552060000	419130000	48114000	271910000	270210000	77230000	243590000	282730000	213470000	8419000	24935000	17303000	27016000	33755000	21458000	17918000	22067000
Phosphoenolpyruvate carboxykinase (ATP) OS=Escherichia coli (strain K12) OX=83333 GN=pckA PE=1 SV=2	P22259	pckA	60 kDa	821930000	1199100000	813430000	1710400000	1107300000	835530000	465460000	418640000	598890000	897470000	668290000	653640000	2984200000	4739500000	3322500000	5616100000	5478400000	5542900000	3697600000	4182300000	3838500000
Adenosine deaminase OS=Escherichia coli (strain K12) OX=83333 GN=add PE=1 SV=2	P22333	add	36 kDa	317110000	527930000	517500000	511910000	258700000	210840000	156610000	117910000	139590000	255370000	91524000	322230000	140750000	193220000	110820000	393390000	171550000	864170000	523540000	460240000	188430000
Chromosome partition protein MukB OS=Escherichia coli (strain K12) OX=83333 GN=mukB PE=1 SV=2	P22523	mukB	170 kDa	135210000	174920000	395210000	249920000	180400000	101350000	44233000	47737000	57376000	120840000	125060000	114210000	71200000	131150000	77044000	136090000	158580000	249410000	132720000	137720000	343320000
Chromosome partition protein MukE OS=Escherichia coli (strain K12) OX=83333 GN=mukE PE=1 SV=5	P22524	mukE	27 kDa	132440000	132240000	69528000	153720000	93408000	82017000	109310000	63780000	117190000	104210000	77851000	78787000	103060000	126110000	108980000	114710000	115260000	146970000	115030000	125610000	106290000
Probable L,D-transpeptidase YcbB OS=Escherichia coli (strain K12) OX=83333 GN=ycbB PE=1 SV=2	P22525	ycbB	68 kDa	20521000	4677800	18465000	4388000	8345500	33430000	2818400	2811300	0	2597800	0	0	0	0	2096400	0	3474400	0	0	0	0
Non-specific ribonucleoside hydrolase RihC OS=Escherichia coli (strain K12) OX=83333 GN=rihC PE=1 SV=1	P22564	rihC	33 kDa	0	0	0	95234000	80752000	50719000	5355400	5679300	7832000	41964000	58331000	65722000	72335000	157060000	89310000	825260000	784790000	967200000	716200000	814790000	691750000
Glutamate racemase OS=Escherichia coli (strain K12) OX=83333 GN=murI PE=1 SV=2	P22634	murI	31 kDa	0	5063800	0	0	17915000	17165000	2846000	0	2366500	18038000	13779000	14108000	9634100	13616000	2718800	10272000	0	9158100	13982000	4425100	0
Farnesyl diphosphate synthase OS=Escherichia coli (strain K12) OX=83333 GN=ispA PE=1 SV=1	P22939	ispA	32 kDa	8191300	13695000	17217000	16920000	19966000	0	4228400	3339600	4254600	9131800	12894000	15420000	0	5686200	4266500	4611200	16542000	26268000	0	5566900	7591100
tRNA/tmRNA (uracil-C(5))-methyltransferase OS=Escherichia coli (strain K12) OX=83333 GN=trmA PE=1 SV=1	P23003	trmA	42 kDa	156480000	164530000	146270000	130230000	125450000	105480000	191590000	180900000	199370000	190040000	160350000	183970000	225360000	250080000	198300000	242100000	60030000	106400000	228100000	261770000	241950000
Protein MalY OS=Escherichia coli (strain K12) OX=83333 GN=malY PE=1 SV=1	P23256	malY	44 kDa	0	0	0	23617000	0	5977600	10749000	0	4509800	9639000	19831000	11506000	2022700	3365500	3086500	8621500	7149200	17369000	17946000	19068000	31737000
Uncharacterized protein YigA OS=Escherichia coli (strain K12) OX=83333 GN=yigA PE=4 SV=1	P23305	yigA	27 kDa	0	0	0	0	0	3786000	0	0	3265300000	0	1779200000	0	0	0	0	0	0	22766000	0	0	0
Thymidine kinase OS=Escherichia coli (strain K12) OX=83333 GN=tdk PE=3 SV=1	P23331	tdk	23 kDa	5548800	0	3514300	49900000	58524000	57193000	8129800	11553000	0	44496000	55554000	37485000	6530400	6706000	20639000	24770000	56381000	34395000	60118000	83614000	51085000
5-keto-4-deoxy-D-glucarate aldolase OS=Escherichia coli (strain K12) OX=83333 GN=garL PE=1 SV=2	P23522	garL	27 kDa	0	0	0	9411300	0	0	0	0	0	0	5286300	6005000	0	6613100	0	264440000	411990000	211430000	129470000	206890000	152500000
Glycerate 2-kinase OS=Escherichia coli (strain K12) OX=83333 GN=garK PE=1 SV=2	P23524	garK	39 kDa	0	0	0	2839300	0	0	0	0	0	0	0	0	0	0	0	29628000	11974000	21614000	20407000	0	36813000
Phosphoenolpyruvate synthase OS=Escherichia coli (strain K12) OX=83333 GN=ppsA PE=1 SV=5	P23538	ppsA	87 kDa	691440000	664660000	688630000	280550000	136130000	163510000	641380000	607670000	526780000	843650000	523660000	826390000	652070000	589220000	762850000	1187800000	1641000000	1831400000	982740000	942500000	1088000000
Phosphoserine aminotransferase OS=Escherichia coli (strain K12) OX=83333 GN=serC PE=1 SV=4	P23721	serC	40 kDa	526910000	517950000	532330000	267960000	226810000	177230000	568810000	451430000	568390000	414000000	355480000	358710000	390780000	497160000	392570000	393830000	495840000	552450000	298840000	373610000	354860000
Ecotin OS=Escherichia coli (strain K12) OX=83333 GN=eco PE=1 SV=1	P23827	eco	18 kDa	238560000	297440000	226050000	319770000	233670000	219090000	385630000	356980000	375840000	360940000	295750000	314940000	338980000	536750000	318610000	525110000	514080000	619080000	605880000	552950000	672700000
CDP-diacylglycerol--serine O-phosphatidyltransferase OS=Escherichia coli (strain K12) OX=83333 GN=pssA PE=1 SV=2	P23830	pssA	53 kDa	192220000	290440000	219300000	275750000	149920000	208710000	139890000	116280000	155130000	122530000	117670000	133690000	116720000	273210000	143400000	199020000	304660000	273970000	177140000	179160000	183460000
Transcriptional regulatory protein PhoP OS=Escherichia coli (strain K12) OX=83333 GN=phoP PE=1 SV=1	P23836	phoP	26 kDa	334240000	383770000	323870000	349330000	255950000	212530000	110950000	103780000	122830000	182270000	167750000	184530000	147380000	205340000	149930000	264930000	333670000	336860000	249270000	212280000	217300000
Endoribonuclease YicC OS=Escherichia coli (strain K12) OX=83333 GN=yicC PE=1 SV=2	P23839	yicC	33 kDa	452220000	524880000	446970000	278410000	241440000	187890000	341350000	268370000	326630000	218090000	213390000	201950000	269540000	311820000	250450000	297240000	270390000	269280000	214170000	225100000	224280000
Periplasmic oligopeptide-binding protein OS=Escherichia coli (strain K12) OX=83333 GN=oppA PE=1 SV=2	P23843	oppA	61 kDa	2719100000	3191200000	2917800000	1540000000	1254900000	965970000	1490000000	1333800000	1729200000	1403700000	956770000	1106800000	3568500000	4763300000	3560600000	3778800000	4423600000	6423300000	3796900000	3334700000	3418000000
Sulfate adenylyltransferase subunit 1 OS=Escherichia coli (strain K12) OX=83333 GN=cysN PE=1 SV=1	P23845	cysN	53 kDa	217640000	260000000	179290000	0	12705000	12384000	57338000	41914000	33499000	0	0	0	20174000	20496000	21815000	12377000	18996000	48751000	0	0	761180000
Dipeptide-binding protein OS=Escherichia coli (strain K12) OX=83333 GN=dppA PE=1 SV=1	P23847	dppA	60 kDa	508130000	511630000	453320000	503420000	367650000	327890000	56805000	55133000	58326000	136530000	100100000	115490000	162860000	237430000	127670000	160860000	238510000	341270000	128940000	95912000	116450000
Thiosulfate sulfurtransferase PspE OS=Escherichia coli (strain K12) OX=83333 GN=pspE PE=1 SV=1	P23857	pspE	11 kDa	0	2154000	21532000	81376000	76616000	50272000	17198000	38746000	9981200	22563000	43500000	35161000	120900000	160770000	114300000	180190000	169290000	282970000	289170000	303640000	199170000
Primosomal replication protein N'' OS=Escherichia coli (strain K12) OX=83333 GN=priC PE=1 SV=3	P23862	priC	20 kDa	0	0	0	0	0	0	3588500	0	0	0	0	0	0	0	0	0	3778500	0	0	2383600	3446400
Tail-specific protease OS=Escherichia coli (strain K12) OX=83333 GN=prc PE=1 SV=2	P23865	prc	77 kDa	83633000	79193000	89219000	73579000	31559000	30782000	25412000	23492000	26849000	61416000	42201000	52006000	33079000	31611000	29827000	28812000	52709000	84521000	28746000	37117000	38705000
Peptidyl-prolyl cis-trans isomerase B OS=Escherichia coli (strain K12) OX=83333 GN=ppiB PE=1 SV=2	P23869	ppiB	18 kDa	958750000	1120700000	1176200000	847240000	646160000	552230000	646500000	633820000	654800000	1179100000	447230000	552280000	784940000	1085900000	806760000	836830000	1059600000	1200900000	1815200000	966530000	934960000
Acetyl esterase OS=Escherichia coli (strain K12) OX=83333 GN=aes PE=1 SV=3	P23872	aes	36 kDa	0	0	0	0	0	0	0	0	0	0	0	0	0	0	0	27054000	9604200	17842000	35230000	30000000	21029000
Methionyl-tRNA formyltransferase OS=Escherichia coli (strain K12) OX=83333 GN=fmt PE=1 SV=4	P23882	fmt	34 kDa	216000000	227040000	249310000	256680000	186480000	165930000	147500000	196630000	217110000	155700000	102780000	154150000	165060000	261120000	244310000	143680000	108300000	188580000	124180000	143050000	140880000
NADP/NAD-dependent aldehyde dehydrogenase PuuC OS=Escherichia coli (strain K12) OX=83333 GN=puuC PE=1 SV=2	P23883	puuC	53 kDa	0	0	0	32278000	7127800	30324000	0	0	0	0	0	0	0	0	0	0	0	0	0	0	0
Glutamate-1-semialdehyde 2,1-aminomutase OS=Escherichia coli (strain K12) OX=83333 GN=hemL PE=1 SV=2	P23893	hemL	45 kDa	268890000	257840000	261010000	643970000	478100000	325370000	212290000	213240000	198960000	430760000	360280000	469290000	69390000	4525900000	92701000	364530000	370640000	5187600000	663270000	653730000	663370000
Protease HtpX OS=Escherichia coli (strain K12) OX=83333 GN=htpX PE=1 SV=1	P23894	htpX	32 kDa	0	6140400	9784500	23282000	21668000	8016600	3934200	3412000	4187700	18054000	7420200	27144000	5787200	6841800	7102700	5893700	11414000	20983000	12807000	13072000	6528000
Acetylornithine deacetylase OS=Escherichia coli (strain K12) OX=83333 GN=argE PE=1 SV=2	P23908	argE	42 kDa	21526000	38745000	29379000	30539000	20595000	18233000	42636000	36305000	27736000	5619400	13340000	30701000	9382900	7794900	11873000	28817000	31935000	43245000	35868000	43607000	26471000
DNA mismatch repair protein MutS OS=Escherichia coli (strain K12) OX=83333 GN=mutS PE=1 SV=1	P23909	mutS	95 kDa	51123000	58516000	49211000	71987000	47923000	43402000	23514000	15860000	21641000	57863000	57951000	52145000	13749000	33141000	17625000	55900000	50077000	78804000	54318000	47291000	62616000
Fructokinase OS=Escherichia coli (strain K12) OX=83333 GN=mak PE=1 SV=2	P23917	mak	32 kDa	41954000	37873000	10363000	127150000	96361000	64321000	18732000	22473000	17431000	44839000	40180000	57213000	4108300	7018900	0	88895000	62898000	82253000	75709000	80892000	77087000
Dipeptidyl carboxypeptidase OS=Escherichia coli (strain K12) OX=83333 GN=dcp PE=1 SV=4	P24171	dcp	78 kDa	294180000	330520000	310660000	208850000	164690000	127110000	224710000	207510000	219310000	140370000	124350000	160470000	149030000	216420000	144710000	199160000	174050000	203260000	194570000	197350000	193170000
Lipopolysaccharide heptosyltransferase 1 OS=Escherichia coli (strain K12) OX=83333 GN=waaC PE=1 SV=1	P24173	waaC	36 kDa	1192500	5224200	3870600	2159000	1192000	0	0	0	0	0	0	1196300	0	0	0	1014800	0	0	0	929790	903090
Protein YffB OS=Escherichia coli (strain K12) OX=83333 GN=yffB PE=1 SV=1	P24178	yffB	14 kDa	81289000	98475000	95617000	82617000	72113000	72449000	154340000	138670000	163280000	55792000	88511000	54423000	118580000	164950000	83332000	89982000	86969000	461860000	155640000	174920000	156990000
Biotin carboxylase OS=Escherichia coli (strain K12) OX=83333 GN=accC PE=1 SV=2	P24182	accC	49 kDa	709210000	773680000	668620000	916050000	647350000	530580000	528370000	399030000	494270000	625880000	550320000	888970000	345970000	558110000	475890000	725190000	833270000	931100000	829660000	691600000	914460000
Formate dehydrogenase, nitrate-inducible, major subunit OS=Escherichia coli (strain K12) OX=83333 GN=fdnG PE=1 SV=3	P24183	fdnG	113 kDa	0	14891000	0	20390000	19141000	13759000	11919000	9354300	21317000	8707900	375840000	14548000	0	0	0	0	0	0	0	0	0
Bifunctional protein FolD OS=Escherichia coli (strain K12) OX=83333 GN=folD PE=1 SV=4	P24186	folD	31 kDa	31616000	88626000	78853000	168590000	82423000	97589000	47590000	73310000	91098000	115070000	101900000	88208000	122990000	195700000	122040000	162740000	138130000	189380000	131700000	66153000	128360000
tRNA uridine(34) hydroxylase OS=Escherichia coli (strain K12) OX=83333 GN=trhO PE=1 SV=2	P24188	trhO	40 kDa	4283400	5014800	16523000	0	0	0	2560000	2596100	2620000	0	0	0	400360000	798100000	409900000	0	0	0	0	0	0
Hydrogenase maturation factor HypD OS=Escherichia coli (strain K12) OX=83333 GN=hypD PE=1 SV=1	P24192	hypD	41 kDa	0	0	0	5650800	18912000	3242700	0	0	0	19919000	15636000	19488000	0	0	0	0	0	0	0	0	0
Carbamoyl dehydratase HypE OS=Escherichia coli (strain K12) OX=83333 GN=hypE PE=1 SV=2	P24193	hypE	35 kDa	0	0	0	26973000	22047000	155330000	0	0	15064000	20640000	17148000	21636000	0	0	0	0	0	11744000	0	0	0
Type IV methyl-directed restriction enzyme EcoKMrr OS=Escherichia coli (strain K12) OX=83333 GN=mrr PE=1 SV=1	P24202	mrr	34 kDa	28599000	45580000	21703000	69774000	74761000	52493000	25436000	3895900	7236700	76876000	55644000	50471000	22307000	37313000	16787000	75997000	77346000	84530000	96331000	90588000	71459000
Zinc chaperone YjiA OS=Escherichia coli (strain K12) OX=83333 GN=yjiA PE=1 SV=3	P24203	yjiA	36 kDa	23219000	32242000	27274000	98124000	79666000	59790000	5537700	10817000	12213000	63334000	51456000	74049000	0	22269000	8069300	72529000	94155000	236870000	77400000	31670000	75741000
Mannonate dehydratase OS=Escherichia coli (strain K12) OX=83333 GN=uxuA PE=1 SV=2	P24215	uxuA	45 kDa	107670000	115320000	55776000	631770000	259820000	342800000	36546000	31672000	41350000	177590000	248360000	176100000	72818000	117990000	86327000	256610000	440230000	803360000	425460000	524750000	553350000
Holo-[acyl-carrier-protein] synthase OS=Escherichia coli (strain K12) OX=83333 GN=acpS PE=1 SV=3	P24224	acpS	14 kDa	5841100	6012900	14494000	33919000	6986000	18981000	24314000	21553000	29581000	32736000	15121000	23994000	20036000	6707200	14712000	26428000	24915000	29797000	5380900	15955000	10629000
ATP-dependent DNA helicase RecG OS=Escherichia coli (strain K12) OX=83333 GN=recG PE=1 SV=1	P24230	recG	76 kDa	2177300	0	0	5200400	0	5501400	0	0	0	0	7181900	0	0	0	0	1535300	1187000	0	5817100	0	3846300
Flavohemoprotein OS=Escherichia coli (strain K12) OX=83333 GN=hmp PE=1 SV=1	P24232	hmp	44 kDa	271750000	118400000	278350000	94890000	102310000	137680000	106860000	80826000	96069000	122650000	77557000	106940000	454050000	617000000	417440000	705580000	726420000	677550000	682280000	653960000	521150000
HTH-type transcriptional regulator AscG OS=Escherichia coli (strain K12) OX=83333 GN=ascG PE=1 SV=4	P24242	ascG	37 kDa	0	0	0	18209000	0	0	0	0	0	0	0	9248400	0	0	0	14809000	0	4237300	0	0	0
Sigma factor-binding protein Crl OS=Escherichia coli (strain K12) OX=83333 GN=crl PE=1 SV=5	P24251	crl	16 kDa	145510000	164170000	133810000	240620000	170030000	135550000	0	0	0	0	0	0	47460000	66239000	50467000	184200000	198410000	315660000	172210000	147380000	162590000
Uncharacterized protein YbgA OS=Escherichia coli (strain K12) OX=83333 GN=ybgA PE=4 SV=1	P24252	ybgA	20 kDa	35492000	35747000	28891000	32231000	27348000	25377000	0	0	0	0	9869500	0	6199100	0	0	0	3497300	0	0	0	0
RNA polymerase sigma-54 factor OS=Escherichia coli (strain K12) OX=83333 GN=rpoN PE=1 SV=2	P24255	rpoN	54 kDa	9609200	9317600	16449000	53346000	33191000	47849000	0	0	3482200	16546000	22256000	34083000	0	5308000	4963600	28180000	21425000	14190000	30715000	18875000	19699000
DNA repair protein RadA OS=Escherichia coli (strain K12) OX=83333 GN=radA PE=1 SV=1	P24554	radA	49 kDa	0	0	0	8060600	9352400	5957700	0	0	0	15368000	5852800	3229900	0	0	0	9754200	0	13197000	6370500	0	3243100
Protease 2 OS=Escherichia coli (strain K12) OX=83333 GN=ptrB PE=1 SV=2	P24555	ptrB	79 kDa	10746000	10439000	12298000	30635000	17410000	17179000	3805400	0	2977500	3603300	3209200	3013600	0	0	0	2423300	0	0	14472000	13473000	2076100
Tellurite methyltransferase OS=Escherichia coli (strain K12) OX=83333 GN=tehB PE=1 SV=1	P25397	tehB	23 kDa	206120000	205820000	233420000	160240000	118830000	94275000	77445000	38694000	66949000	105140000	124280000	128190000	31834000	37001000	24775000	52648000	65581000	100160000	79037000	67906000	76694000
S-(hydroxymethyl)glutathione dehydrogenase OS=Escherichia coli (strain K12) OX=83333 GN=frmA PE=1 SV=3	P25437	frmA	39 kDa	275250000	129110000	214530000	509530000	335350000	310420000	298390000	258770000	251300000	374160000	308740000	384720000	136300000	267720000	138380000	210940000	326290000	359630000	260500000	396090000	292100000
Aconitate hydratase A OS=Escherichia coli (strain K12) OX=83333 GN=acnA PE=1 SV=3	P25516	acnA	98 kDa	1065500000	1116600000	755890000	2322800000	1575800000	1545500000	159370000	117110000	251980000	460000000	572550000	455910000	698460000	1049300000	919160000	487290000	513990000	611430000	394820000	440450000	470700000
GTPase HflX OS=Escherichia coli (strain K12) OX=83333 GN=hflX PE=1 SV=3	P25519	hflX	48 kDa	79411000	106710000	111020000	204000000	135590000	90451000	71065000	59857000	67880000	64277000	42705000	102920000	50962000	70613000	62643000	93862000	99542000	118650000	91893000	89022000	87143000
tRNA modification GTPase MnmE OS=Escherichia coli (strain K12) OX=83333 GN=mnmE PE=1 SV=3	P25522	mnmE	49 kDa	79762000	149440000	72076000	84188000	67966000	92344000	0	2063100	14873000	0	30113000	41279000	6332100	16037000	15623000	49921000	49458000	8474800	27053000	18614000	29117000
Cytosine deaminase OS=Escherichia coli (strain K12) OX=83333 GN=codA PE=1 SV=3	P25524	codA	48 kDa	126990000	138440000	126340000	95661000	83562000	65976000	43050000	66786000	25089000	108110000	78475000	94142000	101840000	62521000	116340000	126230000	136070000	164410000	109000000	174090000	96141000
Succinate-semialdehyde dehydrogenase [NADP(+)] GabD OS=Escherichia coli (strain K12) OX=83333 GN=gabD PE=1 SV=1	P25526	gabD	52 kDa	548620000	524650000	452410000	701230000	626250000	395930000	23671000	30671000	27917000	105150000	108250000	76527000	3791600	0	6362000	10522000	25338000	28478000	25108000	15294000	22065000
2-octaprenyl-6-methoxyphenol hydroxylase OS=Escherichia coli (strain K12) OX=83333 GN=ubiH PE=1 SV=2	P25534	ubiH	42 kDa	7015600	15539000	11342000	10631000	12264000	18582000	4202800	4111000	4856800	10699000	20005000	16925000	0	0	3965400	19565000	16926000	22221000	19949000	24020000	16863000
2-octaprenylphenol hydroxylase OS=Escherichia coli (strain K12) OX=83333 GN=ubiI PE=1 SV=2	P25535	ubiI	44 kDa	31745000	40765000	38564000	48946000	39835000	37947000	25450000	22710000	25265000	36220000	47038000	59652000	12312000	25501000	15202000	70771000	36282000	41658000	50226000	44028000	71591000
dTTP/UTP pyrophosphatase OS=Escherichia coli (strain K12) OX=83333 GN=yhdE PE=1 SV=1	P25536	yhdE	22 kDa	55268000	74028000	51404000	48987000	38159000	27403000	57312000	34932000	56282000	28196000	19113000	33325000	42390000	20852000	33586000	37433000	35363000	50082000	30419000	27955000	19703000
Riboflavin biosynthesis protein RibD OS=Escherichia coli (strain K12) OX=83333 GN=ribD PE=1 SV=1	P25539	ribD	40 kDa	92109000	92987000	72091000	69293000	62495000	52857000	101290000	85729000	99127000	56680000	59069000	71117000	83539000	118110000	83495000	101820000	118830000	136520000	94642000	108130000	67152000
Guanosine-5'-triphosphate,3'-diphosphate pyrophosphatase OS=Escherichia coli (strain K12) OX=83333 GN=gppA PE=1 SV=3	P25552	gppA	55 kDa	65561000	73143000	55186000	37897000	31941000	29459000	47450000	42626000	49962000	20723000	41377000	50713000	47094000	69111000	52662000	77043000	74175000	52519000	48705000	52208000	47982000
Lactaldehyde dehydrogenase OS=Escherichia coli (strain K12) OX=83333 GN=aldA PE=1 SV=2	P25553	aldA	52 kDa	1972600000	2174400000	2092900000	1979100000	1229300000	1197600000	308560000	314080000	303620000	472140000	400870000	548770000	2215300000	3589800000	2439600000	3542000000	4140200000	6471600000	2834100000	3412300000	3505800000
5-methyltetrahydropteroyltriglutamate--homocysteine methyltransferase OS=Escherichia coli (strain K12) OX=83333 GN=metE PE=1 SV=6	P25665	metE	85 kDa	407180000	466170000	363270000	161540000	134220000	101910000	101130000	82302000	73349000	93908000	61051000	89575000	5223400	6843800	0	22887000	33197000	26186000	8258400	18443000	22201000
Membrane protein insertase YidC OS=Escherichia coli (strain K12) OX=83333 GN=yidC PE=1 SV=2	P25714	yidC	62 kDa	0	0	0	51886000	45377000	25236000	0	0	0	44102000	20732000	41842000	4238200	0	10311000	0	15372000	16963000	32088000	2885500	0
Periplasmic alpha-amylase OS=Escherichia coli (strain K12) OX=83333 GN=malS PE=1 SV=1	P25718	malS	76 kDa	8234300	12626000	9987200	9663000	0	0	5011900	0	0	0	0	6779500	0	0	0	0	6493400	7117900	0	5786800	0
Acidic protein MsyB OS=Escherichia coli (strain K12) OX=83333 GN=msyB PE=4 SV=1	P25738	msyB	14 kDa	914080000	1072400000	865560000	3354000000	1437600000	2129700000	113490000	137730000	251130000	373750000	409090000	534620000	35385000	57162000	41597000	57134000	18107000	23163000	40147000	74439000	102120000
Lipopolysaccharide glucosyltransferase WaaG OS=Escherichia coli (strain K12) OX=83333 GN=waaG PE=1 SV=1	P25740	waaG	42 kDa	0	10359000	7191100	0	7002600	0	0	0	7852400	5827600	0	0	0	6164400	6133200	4329400	0	5472500	4444700	7035600	3672400
Lipopolysaccharide heptosyltransferase 3 OS=Escherichia coli (strain K12) OX=83333 GN=waaQ PE=1 SV=2	P25742	waaQ	39 kDa	7665600	0	3602600	0	0	0	0	7375600	3290200	0	0	0	9406900	0	0	0	0	0	0	0	0
tRNA-specific 2-thiouridylase MnmA OS=Escherichia coli (strain K12) OX=83333 GN=mnmA PE=1 SV=4	P25745	mnmA	41 kDa	191210000	123420000	167730000	161870000	153610000	102100000	136760000	167480000	88840000	159330000	60270000	87238000	122440000	196370000	110940000	165910000	159570000	178470000	115440000	64687000	150660000
High frequency lysogenization protein HflD OS=Escherichia coli (strain K12) OX=83333 GN=hflD PE=1 SV=1	P25746	hflD	23 kDa	0	0	0	29026000	19507000	3796600	0	0	0	13874000	10457000	25253000	0	0	0	0	0	29454000	22028000	0	5004700
ATP-dependent RNA helicase RhlE OS=Escherichia coli (strain K12) OX=83333 GN=rhlE PE=1 SV=3	P25888	rhlE	50 kDa	26659000	32574000	37424000	25385000	15570000	17293000	36565000	35836000	41954000	20349000	15780000	18881000	26930000	33970000	34127000	23290000	21454000	25974000	24802000	20614000	21360000
NAD-dependent dihydropyrimidine dehydrogenase subunit PreA OS=Escherichia coli (strain K12) OX=83333 GN=preA PE=1 SV=3	P25889	preA	45 kDa	0	0	0	134980000	85534000	78469000	0	0	0	156800000	136710000	164980000	0	0	12737000	317440000	297220000	334600000	406500000	592930000	415930000
Metalloprotease LoiP OS=Escherichia coli (strain K12) OX=83333 GN=loiP PE=1 SV=2	P25894	loiP	27 kDa	62159000	60873000	46198000	7204200	6638400	13433000	25716000	21864000	18294000	4727900	5709200	6940000	33410000	48444000	31401000	15227000	17272000	21652000	0	13375000	15419000
Pyridoxine 4-dehydrogenase OS=Escherichia coli (strain K12) OX=83333 GN=pdxI PE=1 SV=1	P25906	pdxI	31 kDa	33644000	39457000	23227000	20405000	8548900	5407500	0	0	0	4874400	0	0	20537000	6836700	11167000	35764000	26033000	46994000	31247000	28989000	28521000
N-acetylmuramoyl-L-alanine amidase AmiB OS=Escherichia coli (strain K12) OX=83333 GN=amiB PE=1 SV=2	P26365	amiB	48 kDa	14305000	6871700	0	2433000	7314800	0	0	2111500	0	0	0	0	0	0	0	0	3007700	0	10281000	2960200	0
Chorismate pyruvate-lyase OS=Escherichia coli (strain K12) OX=83333 GN=ubiC PE=1 SV=2	P26602	ubiC	19 kDa	3646900	0	0	3433600	0	2509900	1748500	0	0	0	4381500	3598000	0	0	0	17879000	12359000	15248000	0	8289200	4958500
Cytoplasmic alpha-amylase OS=Escherichia coli (strain K12) OX=83333 GN=amyA PE=1 SV=3	P26612	amyA	57 kDa	62668000	62797000	59665000	130920000	104870000	648510000	6165600	1112100000	1134700000	502630000	5359300	603170000	0	0	1118800000	0	0	0	219540000	222920000	271740000
NAD-dependent malic enzyme OS=Escherichia coli (strain K12) OX=83333 GN=maeA PE=1 SV=4	P26616	maeA	63 kDa	485000000	565030000	487050000	622980000	406590000	387690000	331110000	348990000	416600000	435670000	355800000	279260000	410720000	604030000	471090000	739690000	789380000	901700000	587570000	861720000	824890000
Probable acrylyl-CoA reductase AcuI OS=Escherichia coli (strain K12) OX=83333 GN=acuI PE=1 SV=1	P26646	acuI	35 kDa	436510000	389200000	300100000	539310000	361910000	309730000	196120000	155190000	183600000	317430000	313940000	342410000	260530000	312800000	214880000	413250000	305330000	458470000	272740000	303820000	301050000
Cell division protein FtsP OS=Escherichia coli (strain K12) OX=83333 GN=ftsP PE=1 SV=2	P26648	ftsP	52 kDa	20688000	14187000	24915000	0	12862000	843630	34835000	15621000	35910000	11100000	8202800	13534000	8853600	7019700	3202500	18378000	27957000	58166000	16372000	10467000	16781000
Lipopolysaccharide core biosynthesis protein WaaS OS=Escherichia coli (strain K12) OX=83333 GN=waaS PE=4 SV=1	P27126	waaS	37 kDa	1489000	44795000	23666000	10426000	3026800	16280000	2730000	14770000	0	3169100	0	0	0	25434000	17961000	2095000	0	0	1867600	3448800	1798200
Lipopolysaccharide 1,6-galactosyltransferase OS=Escherichia coli (strain K12) OX=83333 GN=waaB PE=1 SV=2	P27127	waaB	41 kDa	0	0	0	37485000	22268000	11746000	21052000	18659000	25380000	22032000	22336000	18498000	0	4582700	10454000	24460000	24018000	18980000	17953000	18614000	22600000
Uncharacterized protein YfeD OS=Escherichia coli (strain K12) OX=83333 GN=yfeD PE=4 SV=3	P27238	yfeD	15 kDa	0	0	0	16595000	22927000	16068000	0	0	0	40765000	29497000	16320000	7783500	25596000	9179400	60036000	56356000	94941000	66566000	56244000	57651000
Putative lipopolysaccharide heptosyltransferase 4 OS=Escherichia coli (strain K12) OX=83333 GN=waaU PE=4 SV=2	P27242	waaU	42 kDa	0	0	0	0	5746100	2717700	0	0	0	7426600	0	5554800	0	0	0	7228100	13408000	4580800	11241000	7213400	13809000
Aminomethyltransferase OS=Escherichia coli (strain K12) OX=83333 GN=gcvT PE=1 SV=3	P27248	gcvT	40 kDa	807730000	885760000	804540000	537870000	394830000	323080000	437360000	330350000	403000000	584710000	484720000	524400000	639600000	916940000	616360000	1124700000	990460000	1197700000	745280000	868570000	715770000
Bifunctional uridylyltransferase/uridylyl-removing enzyme OS=Escherichia coli (strain K12) OX=83333 GN=glnD PE=1 SV=2	P27249	glnD	102 kDa	25631000	14178000	558280000	0	0	0	2226900	0	15206000	8382300	0	0	15066000	20939000	180840000	538060000	10252000	584500000	17627000	0	2879800
Aldehyde reductase Ahr OS=Escherichia coli (strain K12) OX=83333 GN=ahr PE=1 SV=2	P27250	ahr	37 kDa	163580000	185540000	150980000	370440000	210060000	227140000	41539000	39633000	47432000	58399000	53106000	67523000	0	0	0	3399200	3148800	0	0	5706800	3833100
Trifunctional NAD biosynthesis/regulator protein NadR OS=Escherichia coli (strain K12) OX=83333 GN=nadR PE=1 SV=2	P27278	nadR	47 kDa	42598000	52793000	34689000	66145000	47442000	28151000	28746000	19470000	20948000	55702000	41446000	52867000	8376400	10142000	11561000	40006000	37466000	52459000	74870000	34540000	52674000
Oligopeptidase A OS=Escherichia coli (strain K12) OX=83333 GN=prlC PE=3 SV=3	P27298	prlC	77 kDa	972490000	1112300000	1232000000	937880000	398450000	337720000	515510000	546970000	418650000	339680000	284360000	408100000	510420000	1409700000	646270000	388450000	797410000	572250000	325900000	497650000	382150000
Transketolase 1 OS=Escherichia coli (strain K12) OX=83333 GN=tktA PE=1 SV=5	P27302	tktA	72 kDa	2564900000	2449200000	2265900000	2457200000	1946800000	1632800000	2329800000	2270300000	2228700000	2189400000	1891100000	2099200000	4877300000	3586100000	2315000000	2398600000	3508100000	6480300000	3045400000	2965900000	3864900000
Multidrug export protein EmrA OS=Escherichia coli (strain K12) OX=83333 GN=emrA PE=1 SV=2	P27303	emrA	43 kDa	0	0	0	0	1876000	127780000	0	154470000	0	1999500	0	0	0	0	1748100	115470000	0	199850000	0	152880000	0
Soluble pyridine nucleotide transhydrogenase OS=Escherichia coli (strain K12) OX=83333 GN=sthA PE=1 SV=5	P27306	sthA	52 kDa	390180000	351270000	568780000	648560000	667530000	411950000	89227000	101330000	88850000	148640000	105920000	123700000	586970000	956080000	700450000	671280000	861120000	1333800000	575960000	551090000	828620000
Ribosomal protein uL16 3-hydroxylase OS=Escherichia coli (strain K12) OX=83333 GN=roxA PE=1 SV=2	P27431	roxA	43 kDa	100820000	149290000	89327000	62334000	79304000	70622000	120740000	97775000	151710000	3054400000	68689000	42224000	0	0	0	22768000	0	0	0	0	0
Cytoskeleton protein RodZ OS=Escherichia coli (strain K12) OX=83333 GN=rodZ PE=1 SV=2	P27434	rodZ	36 kDa	55044000	52239000	55011000	20461000	36910000	28415000	54083000	34608000	60485000	24581000	24000000	27827000	85911000	116700000	52789000	61542000	78784000	55919000	73745000	50827000	50312000
Acetyl-coenzyme A synthetase OS=Escherichia coli (strain K12) OX=83333 GN=acs PE=1 SV=2	P27550	acs	72 kDa	165180000	221360000	159040000	509290000	321900000	237070000	0	0	0	7681400	9673000	14378000	396860000	488330000	405200000	436170000	580710000	1074100000	260180000	251410000	260640000
UDP-N-acetylglucosamine 2-epimerase OS=Escherichia coli (strain K12) OX=83333 GN=wecB PE=1 SV=2	P27828	wecB	42 kDa	90796000	110400000	104600000	83779000	147990000	114460000	108560000	82986000	103950000	2069900000	1559300000	81528000	80075000	112850000	92850000	67806000	82962000	110630000	76908000	173610000	77782000
UDP-N-acetyl-D-mannosamine dehydrogenase OS=Escherichia coli (strain K12) OX=83333 GN=wecC PE=1 SV=4	P27829	wecC	46 kDa	47584000	63814000	46703000	113850000	76308000	65556000	26412000	37936000	58600000	113210000	81407000	99631000	42612000	21655000	37843000	70678000	151050000	72266000	165450000	116790000	128680000
dTDP-glucose 4,6-dehydratase 2 OS=Escherichia coli (strain K12) OX=83333 GN=rffG PE=1 SV=3	P27830	rffG	40 kDa	112630000	187590000	151380000	151230000	133560000	115500000	83750000	92486000	122860000	117270000	96388000	116190000	55643000	173640000	103140000	151690000	156230000	219210000	141960000	147750000	137920000
dTDP-4-amino-4,6-dideoxygalactose transaminase OS=Escherichia coli (strain K12) OX=83333 GN=wecE PE=1 SV=2	P27833	wecE	42 kDa	53913000	31345000	8578000	47218000	32640000	22280000	43605000	44512000	45928000	17033000	26558000	33447000	7460800	14647000	9954400	11862000	11942000	25206000	113110000	80189000	32100000
Iron-sulfur cluster assembly protein CyaY OS=Escherichia coli (strain K12) OX=83333 GN=cyaY PE=1 SV=1	P27838	cyaY	12 kDa	61537000	106450000	59866000	72687000	29845000	29347000	20210000	30964000	34726000	21443000	27029000	41083000	35735000	49763000	29038000	34844000	70191000	40349000	23422000	35947000	34502000
Pyridoxal phosphate phosphatase YigL OS=Escherichia coli (strain K12) OX=83333 GN=yigL PE=1 SV=4	P27848	yigL	30 kDa	26782000	82738000	14957000	126160000	14152000	4334200	0	0	0	0	0	4133800	0	0	0	14516000	6325500	79466000	8314800	8293500	11141000
3'-5' ssDNA/RNA exonuclease TatD OS=Escherichia coli (strain K12) OX=83333 GN=tatD PE=1 SV=3	P27859	tatD	29 kDa	0	0	0	0	3010700	0	1568700	0	1688300	3544400	1816100	0	0	0	0	1487100	0	0	0	0	2819600
dCTP deaminase OS=Escherichia coli (strain K12) OX=83333 GN=dcd PE=1 SV=1	P28248	dcd	21 kDa	132970000	161310000	134890000	172500000	127490000	115360000	194900000	177740000	200160000	174800000	168490000	200270000	134490000	195260000	132320000	197220000	229820000	260550000	210150000	215940000	173520000
Quinone oxidoreductase 1 OS=Escherichia coli (strain K12) OX=83333 GN=qorA PE=1 SV=1	P28304	qorA	35 kDa	533770000	758330000	534310000	414370000	434680000	301010000	180680000	165570000	182390000	217170000	137740000	176030000	149440000	178700000	139120000	156100000	210800000	158180000	136710000	141660000	144570000
Aminodeoxychorismate lyase OS=Escherichia coli (strain K12) OX=83333 GN=pabC PE=1 SV=1	P28305	pabC	30 kDa	0	0	12952000	0	1337700	0	0	0	0	0	0	1275900	0	0	0	0	0	0	1747900	1838100	1967800
D-methionine-binding lipoprotein MetQ OS=Escherichia coli (strain K12) OX=83333 GN=metQ PE=1 SV=2	P28635	metQ	29 kDa	79258000	80455000	45186000	90168000	53869000	45867000	42209000	9396400	43944000	51466000	40518000	48892000	28007000	23775000	29178000	27563000	21088000	49842000	49740000	14437000	10190000
Flavodoxin/ferredoxin--NADP reductase OS=Escherichia coli (strain K12) OX=83333 GN=fpr PE=1 SV=4	P28861	fpr	28 kDa	180560000	160900000	78572000	112440000	70487000	19739000	217380000	256360000	233450000	77198000	41711000	45354000	114660000	102580000	84744000	81310000	47839000	116110000	40138000	53728000	71161000
Anaerobic ribonucleoside-triphosphate reductase OS=Escherichia coli (strain K12) OX=83333 GN=nrdD PE=1 SV=2	P28903	nrdD	80 kDa	50484000	62761000	47930000	255540000	202570000	221520000	2496800	0	5263700	199230000	195010000	223620000	0	0	0	47820000	65947000	68489000	56701000	57716000	63326000
Trehalose-6-phosphate hydrolase OS=Escherichia coli (strain K12) OX=83333 GN=treC PE=1 SV=3	P28904	treC	64 kDa	1242600000	1315500000	1359300000	2029000000	1640400000	1476000000	582270000	538420000	961360000	1987200000	1516800000	2031200000	1153300000	1445300000	1393200000	1591800000	1991600000	1946900000	2048900000	1673000000	1559500000
DNA polymerase III subunit chi OS=Escherichia coli (strain K12) OX=83333 GN=holC PE=1 SV=1	P28905	holC	17 kDa	4441100	0	8252700	25870000	19020000	13785000	0	0	0	0	0	19338000	0	0	0	1254600	1673500	1335700	0	10955000	9947300
Alanine racemase, catabolic OS=Escherichia coli (strain K12) OX=83333 GN=dadX PE=2 SV=2	P29012	dadX	39 kDa	58060000	70636000	77875000	80908000	35796000	42020000	14179000	21679000	18978000	0	0	9708100	78492000	114070000	72904000	126250000	142420000	302360000	119560000	141880000	102450000
Uncharacterized protein YcgB OS=Escherichia coli (strain K12) OX=83333 GN=ycgB PE=4 SV=2	P29013	ycgB	61 kDa	0	301450000	6625500	434280000	472170000	336090000	1811800	0	0	244110000	17485000	286620000	0	0	0	0	0	0	0	0	0
Glutathione/L-cysteine transport system ATP-binding/permease protein CydD OS=Escherichia coli (strain K12) OX=83333 GN=cydD PE=1 SV=3	P29018	cydD	65 kDa	0	0	0	0	0	2158000	0	0	0	2761400	0	2541700	0	0	0	0	0	0	19141000	1634900	0
Cell division protein FtsN OS=Escherichia coli (strain K12) OX=83333 GN=ftsN PE=1 SV=3	P29131	ftsN	36 kDa	16589000	15668000	8775000	16745000	14542000	12655000	28285000	19588000	24607000	14254000	9830100	14006000	30953000	49952000	33138000	15242000	21145000	14118000	17478000	20469000	15016000
o-succinylbenzoate synthase OS=Escherichia coli (strain K12) OX=83333 GN=menC PE=1 SV=2	P29208	menC	35 kDa	5097700	6633200	4158500	43651000	22656000	23000000	1969200	0	0	16205000	35021000	20685000	0	0	0	9636800	0	0	7294400	5650900	16989000
UPF0502 protein YceH OS=Escherichia coli (strain K12) OX=83333 GN=yceH PE=1 SV=3	P29217	yceH	24 kDa	231170000	231220000	105920000	177500000	103260000	78438000	173860000	147280000	202390000	184870000	153610000	182010000	188340000	228800000	160260000	277180000	222630000	244320000	249760000	236280000	188700000
Uroporphyrinogen decarboxylase OS=Escherichia coli (strain K12) OX=83333 GN=hemE PE=3 SV=3	P29680	hemE	39 kDa	123120000	201310000	132550000	132910000	76146000	57457000	104450000	97813000	105170000	62869000	70220000	101340000	90237000	128960000	81736000	102670000	116020000	57113000	106740000	95910000	71651000
Peptidase T OS=Escherichia coli (strain K12) OX=83333 GN=pepT PE=1 SV=2	P29745	pepT	45 kDa	255790000	420280000	263180000	418090000	339200000	318650000	150440000	135480000	151960000	402200000	264370000	319760000	0	0	0	0	0	0	0	0	0
Nicotinate-nucleotide pyrophosphorylase [carboxylating] OS=Escherichia coli (strain K12) OX=83333 GN=nadC PE=1 SV=7	P30011	nadC	33 kDa	19195000	10570000	20702000	15539000	18956000	10341000	5584300	4043700	4797000	29667000	18531000	18686000	5735100	7317300	5967500	5642800	38293000	38255000	30302000	31725000	17476000
Ribonuclease T OS=Escherichia coli (strain K12) OX=83333 GN=rnt PE=1 SV=1	P30014	rnt	24 kDa	39405000	85243000	67066000	28924000	27522000	45286000	44354000	40035000	36210000	51185000	36510000	52571000	27076000	62801000	26425000	22539000	15146000	0	0	23311000	28877000
3-isopropylmalate dehydrogenase OS=Escherichia coli (strain K12) OX=83333 GN=leuB PE=1 SV=3	P30125	leuB	40 kDa	2021600	3488200	0	0	4230600	0	3952100	2518900	1435900	0	0	0	1768500	0	0	4003300	2496400	5106100	2223200	3812600	5043900
Transcription elongation factor GreB OS=Escherichia coli (strain K12) OX=83333 GN=greB PE=1 SV=2	P30128	greB	19 kDa	26221000	25727000	20074000	35152000	27949000	16796000	13631000	6955600	18918000	25888000	15162000	36059000	8415100	14710000	16147000	26174000	29983000	11671000	29415000	22432000	9037000
Uncharacterized protein YbiB OS=Escherichia coli (strain K12) OX=83333 GN=ybiB PE=1 SV=1	P30177	ybiB	35 kDa	255290000	296650000	243770000	382690000	271120000	210790000	259950000	219870000	241730000	208830000	168830000	206470000	137190000	210050000	134750000	312400000	165420000	232170000	175070000	240810000	283310000
Hydroxycarboxylate dehydrogenase B OS=Escherichia coli (strain K12) OX=83333 GN=hcxB PE=1 SV=2	P30178	hcxB	39 kDa	0	0	0	45715000	24998000	37600000	5218200	0	0	18368000	28415000	48119000	0	0	5064600	80974000	104780000	88159000	85240000	104960000	88576000
L-serine dehydratase 2 OS=Escherichia coli (strain K12) OX=83333 GN=sdaB PE=2 SV=2	P30744	sdaB	49 kDa	2755500	84727000	56301000	222780000	160560000	144580000	38933000	24730000	32111000	163910000	139390000	179390000	44697000	55130000	42216000	227920000	167600000	317470000	267980000	229450000	221360000
GTP 3',8-cyclase OS=Escherichia coli (strain K12) OX=83333 GN=moaA PE=1 SV=1	P30745	moaA	37 kDa	28865000	48097000	30932000	0	0	0	0	0	0	0	0	0	0	0	0	0	0	0	0	0	0
Molybdopterin synthase sulfur carrier subunit OS=Escherichia coli (strain K12) OX=83333 GN=moaD PE=1 SV=2	P30748	moaD	9 kDa	278340000	197190000	302940000	78230000	51951000	57041000	132350000	138650000	138280000	57377000	44767000	50085000	86588000	78379000	125550000	26642000	30308000	34447000	24040000	26175000	24922000
Molybdopterin synthase catalytic subunit OS=Escherichia coli (strain K12) OX=83333 GN=moaE PE=1 SV=3	P30749	moaE	17 kDa	525840000	398500000	807930000	178140000	83631000	44595000	182430000	131900000	213460000	138420000	44046000	85374000	160600000	298840000	168830000	17065000	8553800	12247000	17713000	6062800	10245000
Methionine import ATP-binding protein MetN OS=Escherichia coli (strain K12) OX=83333 GN=metN PE=1 SV=4	P30750	metN	38 kDa	0	0	0	0	9146900	0	0	0	0	0	0	9260900	0	0	0	0	2267600	0	1640500	1347000	0
Exoribonuclease 2 OS=Escherichia coli (strain K12) OX=83333 GN=rnb PE=1 SV=3	P30850	rnb	72 kDa	211320000	256020000	193010000	278310000	233060000	155090000	92944000	62957000	126940000	234080000	208270000	194810000	137230000	172260000	114490000	235550000	196030000	295920000	148180000	194160000	152460000
Putative ABC transporter arginine-binding protein 2 OS=Escherichia coli (strain K12) OX=83333 GN=artI PE=1 SV=3	P30859	artI	27 kDa	1296100000	1969700000	1529800000	900100000	532320000	513810000	576510000	680730000	581270000	545070000	410650000	501170000	203600000	246330000	187670000	219790000	265770000	342740000	518290000	261620000	231660000
ABC transporter arginine-binding protein 1 OS=Escherichia coli (strain K12) OX=83333 GN=artJ PE=1 SV=2	P30860	artJ	27 kDa	93812000	93598000	78188000	38042000	34013000	27090000	41422000	52379000	51113000	24113000	15601000	36978000	20130000	24813000	33414000	30740000	26882000	29736000	31589000	13695000	20062000
2,5-diketo-D-gluconic acid reductase B OS=Escherichia coli (strain K12) OX=83333 GN=dkgB PE=1 SV=2	P30863	dkgB	29 kDa	144640000	97642000	62779000	69308000	41764000	60104000	144150000	85013000	74925000	44247000	52203000	51028000	82855000	69997000	85789000	130150000	81423000	91506000	74067000	119140000	91093000
Uncharacterized HTH-type transcriptional regulator YafC OS=Escherichia coli (strain K12) OX=83333 GN=yafC PE=3 SV=1	P30864	yafC	34 kDa	16727000	15178000	23931000	29606000	44840000	27847000	24849000	23771000	23121000	40258000	24244000	30939000	14907000	17803000	16940000	37303000	48287000	78536000	32476000	48404000	33207000
Bifunctional glutamine synthetase adenylyltransferase/adenylyl-removing enzyme OS=Escherichia coli (strain K12) OX=83333 GN=glnE PE=1 SV=2	P30870	glnE	108 kDa	71787000	79059000	56936000	46140000	43512000	29934000	30114000	33755000	46818000	33529000	29864000	16687000	55901000	65228000	47427000	57533000	71081000	73776000	47090000	43484000	44885000
Inorganic triphosphatase OS=Escherichia coli (strain K12) OX=83333 GN=ygiF PE=1 SV=1	P30871	ygiF	48 kDa	164780000	150610000	156740000	122710000	104670000	71927000	109910000	94548000	112710000	103840000	78269000	97973000	98383000	122670000	93551000	125300000	86774000	128250000	102990000	111280000	70490000
Transcription-repair-coupling factor OS=Escherichia coli (strain K12) OX=83333 GN=mfd PE=1 SV=2	P30958	mfd	130 kDa	72767000	113380000	61873000	71415000	53842000	252920000	24114000	12555000	16440000	64158000	68329000	74443000	30454000	54807000	239120000	76194000	69301000	136840000	100400000	65673000	67120000
3-methyl-2-oxobutanoate hydroxymethyltransferase OS=Escherichia coli (strain K12) OX=83333 GN=panB PE=1 SV=1	P31057	panB	28 kDa	375150000	437880000	393500000	325550000	239580000	196400000	323550000	279590000	303930000	299440000	273060000	287710000	305340000	508540000	360550000	607700000	664370000	921120000	642230000	629780000	511920000
Probable transporter YedE OS=Escherichia coli (strain K12) OX=83333 GN=yedE PE=1 SV=1	P31064	yedE	44 kDa	0	0	0	12297000	33432000	14161000	0	0	0	8236600	19364000	31578000	0	0	0	28132000	16530000	18319000	43770000	0	0
Voltage-gated potassium channel Kch OS=Escherichia coli (strain K12) OX=83333 GN=kch PE=1 SV=1	P31069	kch	46 kDa	3250700	0	0	8416900	4833400	4543000	0	4726500	2983400	4275300	11399000	8594900	0	0	0	0	0	0	13933000	0	0
Phosphoglucosamine mutase OS=Escherichia coli (strain K12) OX=83333 GN=glmM PE=1 SV=3	P31120	glmM	48 kDa	815580000	807140000	517450000	1183200000	587380000	518830000	933550000	634500000	792760000	850200000	568430000	605540000	634800000	1175100000	668390000	1196200000	790360000	1125100000	732850000	808720000	702840000
Uncharacterized protein YdeI OS=Escherichia coli (strain K12) OX=83333 GN=ydeI PE=3 SV=1	P31130	ydeI	14 kDa	74976000	88075000	71825000	92163000	62406000	46937000	8907500	5974200	0	9011400	5934500	12900000	0	0	0	0	0	0	0	0	0
Protein YdeJ OS=Escherichia coli (strain K12) OX=83333 GN=ydeJ PE=3 SV=1	P31131	ydeJ	18 kDa	2976200	5589400	4213300	10678000	9540000	5931900	0	0	0	0	0	0	0	0	0	0	0	0	0	0	0
Putrescine-binding periplasmic protein PotF OS=Escherichia coli (strain K12) OX=83333 GN=potF PE=1 SV=3	P31133	potF	41 kDa	69661000	62727000	22200000	12252000	7000100	6348000	0	0	0	0	0	0	0	0	5008900	0	0	0	0	0	0
3-mercaptopyruvate sulfurtransferase OS=Escherichia coli (strain K12) OX=83333 GN=sseA PE=1 SV=3	P31142	sseA	31 kDa	152720000	254100000	168470000	353130000	298230000	256120000	86919000	55890000	72777000	317400000	317870000	342690000	98741000	148200000	131330000	423490000	448520000	381050000	357620000	375270000	329960000
Multidrug efflux pump subunit AcrB OS=Escherichia coli (strain K12) OX=83333 GN=acrB PE=1 SV=1	P31224	acrB	114 kDa	10227000	10910000	11748000	23035000	11392000	10613000	6761000	2025300	9635500	16881000	15943000	24638000	0	8702700	6440300	0	10141000	17710000	6781900	10058000	5389200
Adenine deaminase OS=Escherichia coli (strain K12) OX=83333 GN=ade PE=1 SV=2	P31441	ade	64 kDa	0	0	0	149840000	88901000	3157800	0	0	5496800	5648100	14692000	21209000	3452400	0	0	37217000	32731000	61585000	34981000	42317000	56096000
Uncharacterized protein YidR OS=Escherichia coli (strain K12) OX=83333 GN=yidR PE=4 SV=4	P31455	yidR	46 kDa	43954000	49742000	42813000	5299300	15630000	6526800	35982000	37616000	43083000	21420000	19003000	27164000	39937000	48387000	42890000	30778000	34241000	39587000	28916000	31127000	41569000
Galactonate operon transcriptional repressor OS=Escherichia coli (strain K12) OX=83333 GN=dgoR PE=1 SV=4	P31460	dgoR	26 kDa	0	0	0	24348000	6044300	5710700	4625600	3466600	5508200	18840000	7274000	14506000	6817900	0	5417100	11081000	11209000	9252800	9958900	8998200	21524000
ATPase RavA OS=Escherichia coli (strain K12) OX=83333 GN=ravA PE=1 SV=2	P31473	ravA	56 kDa	36009000	35269000	16397000	52043000	60045000	26953000	10290000	8017200	4558900	20464000	33872000	30832000	0	0	0	0	0	8577000	0	6422000	0
Uncharacterized HTH-type transcriptional regulator YieP OS=Escherichia coli (strain K12) OX=83333 GN=yieP PE=4 SV=3	P31475	yieP	26 kDa	12381000	21373000	26814000	104850000	36018000	46082000	0	0	2388700	58570000	47449000	57523000	0	0	0	23239000	28859000	46399000	16428000	14211000	7221700
Thiamine-binding periplasmic protein OS=Escherichia coli (strain K12) OX=83333 GN=thiB PE=1 SV=2	P31550	thiB	36 kDa	36153000	33370000	38706000	14069000	21715000	23635000	7167700	12028000	14139000	9208400	22796000	0	16439000	36912000	25209000	25137000	21908000	43365000	26088000	14551000	19515000
LPS-assembly protein LptD OS=Escherichia coli (strain K12) OX=83333 GN=lptD PE=1 SV=2	P31554	lptD	90 kDa	0	0	5563300	6877600	0	0	5753100	0	0	3405800	2743800	1734100	0	7022500	0	5327700	0	10686000	2988000	0	0
Protein/nucleic acid deglycase 1 OS=Escherichia coli (strain K12) OX=83333 GN=hchA PE=1 SV=3	P31658	hchA	31 kDa	1072900000	1363000000	1163400000	1838700000	1138400000	1058700000	553710000	560310000	587640000	880000000	707650000	962890000	201880000	275340000	227330000	290720000	425320000	528220000	210600000	246760000	183490000
Pantothenate synthetase OS=Escherichia coli (strain K12) OX=83333 GN=panC PE=1 SV=1	P31663	panC	32 kDa	555500000	478430000	725960000	299940000	166850000	226820000	351960000	278940000	473650000	329040000	249970000	246780000	332790000	514700000	351350000	512320000	472290000	505640000	369420000	388320000	290790000
Trehalose-6-phosphate synthase OS=Escherichia coli (strain K12) OX=83333 GN=otsA PE=1 SV=3	P31677	otsA	54 kDa	190550000	167230000	138120000	309790000	264990000	238480000	4621700	0	0	90172000	54902000	66427000	0	0	0	0	0	25525000	0	0	0
Trehalose-6-phosphate phosphatase OS=Escherichia coli (strain K12) OX=83333 GN=otsB PE=1 SV=2	P31678	otsB	29 kDa	22557000	22246000	24718000	24998000	35055000	20547000	0	0	0	0	0	0	0	0	0	0	0	0	0	0	0
Chaperone protein FimC OS=Escherichia coli (strain K12) OX=83333 GN=fimC PE=1 SV=3	P31697	fimC	27 kDa	0	0	0	0	0	3061400	39610000	37241000	32944000	49264000	54380000	46963000	0	0	0	2635800	1957900	3152300	9221300	9273600	3088500
Nitrate/nitrite response regulator protein NarP OS=Escherichia coli (strain K12) OX=83333 GN=narP PE=3 SV=1	P31802	narP	24 kDa	0	25738000	9586600	53218000	105930000	91911000	21391000	21410000	24463000	113280000	109120000	100070000	4216500	0	5297200	124100000	72040000	165440000	175010000	122350000	137370000
Bifunctional NAD(P)H-hydrate repair enzyme Nnr OS=Escherichia coli (strain K12) OX=83333 GN=nnr PE=1 SV=2	P31806	nnr	55 kDa	14058000	4898900	8661400	11606000	36671000	26978000	10696000	12236000	6656900	6666300	0	14718000	0	0	3241900	3291000	0	0	3554700	0	0
Uncharacterized oxidoreductase YciK OS=Escherichia coli (strain K12) OX=83333 GN=yciK PE=1 SV=3	P31808	yciK	28 kDa	29392000	80319000	38780000	75330000	35780000	48858000	7763100	2443000	5716200	22114000	29793000	25096000	0	0	0	34617000	28612000	52631000	36918000	36243000	39734000
Probable zinc protease PqqL OS=Escherichia coli (strain K12) OX=83333 GN=pqqL PE=1 SV=2	P31828	pqqL	105 kDa	0	0	0	0	0	0	0	0	0	0	0	0	21804000	45892000	45236000	6117500	3921300	15562000	2437800	9934900	2740000
NADH-quinone oxidoreductase subunit F OS=Escherichia coli (strain K12) OX=83333 GN=nuoF PE=1 SV=3	P31979	nuoF	49 kDa	86334000	86024000	45864000	85993000	94983000	706710000	10348000	12459000	25183000	42008000	1364000000	48726000	22852000	52388000	37969000	12740000	38398000	83573000	89185000	12144000	47397000
Lipoate-protein ligase A OS=Escherichia coli (strain K12) OX=83333 GN=lplA PE=1 SV=3	P32099	lplA	38 kDa	3266500	0	0	51699000	30508000	34196000	0	0	3152800	0	47587000	56800000	2221400	0	4192500	117240000	76759000	124600000	139590000	117540000	152600000
Oxygen-independent coproporphyrinogen III oxidase OS=Escherichia coli (strain K12) OX=83333 GN=hemN PE=1 SV=4	P32131	hemN	53 kDa	10102000	3622200	3844000	10660000	19023000	6006300	1399700	0	1700900	24260000	12954000	33422000	0	9962900	6917100	44239000	32834000	47421000	37603000	30524000	35155000
Uncharacterized protein YihM OS=Escherichia coli (strain K12) OX=83333 GN=yihM PE=4 SV=1	P32134	yihM	37 kDa	0	0	0	3750700	0	2146000	0	0	1321900	0	2051000	2604600	0	3397800	0	3153700	3465700	4849800	2254700	6137500	6034600
HTH-type transcriptional repressor CsqR OS=Escherichia coli (strain K12) OX=83333 GN=csqR PE=1 SV=2	P32144	csqR	29 kDa	0	7207000	5472100	38985000	25827000	17810000	2749900	0	3316900	23604000	22752000	29172000	0	8947000	8373600	46365000	58207000	65050000	56222000	44507000	49976000
Protein YiiM OS=Escherichia coli (strain K12) OX=83333 GN=yiiM PE=1 SV=2	P32157	yiiM	25 kDa	141450000	194250000	117910000	231220000	143280000	128780000	97806000	75550000	77998000	118660000	102360000	138580000	86432000	106840000	77692000	106060000	82135000	73317000	100520000	93930000	75558000
Uncharacterized protein YiiQ OS=Escherichia coli (strain K12) OX=83333 GN=yiiQ PE=3 SV=1	P32160	yiiQ	22 kDa	13295000	0	0	7850200	0	0	2646200	4585800	0	7407700	0	5986500	8926200	0	0	6347500	6662500	0	10858000	5483400	6049500
UPF0381 protein YiiS OS=Escherichia coli (strain K12) OX=83333 GN=yiiS PE=1 SV=1	P32162	yiiS	11 kDa	105890000	99461000	94027000	182650000	131190000	112700000	82421000	67457000	78814000	101990000	86812000	111380000	50782000	73822000	47716000	47877000	45560000	40665000	38683000	48612000	37187000
Molybdenum cofactor guanylyltransferase OS=Escherichia coli (strain K12) OX=83333 GN=mobA PE=1 SV=1	P32173	mobA	22 kDa	0	0	0	1687600	2545200	1731300	0	0	0	0	2688900	2636400	0	0	0	0	0	0	0	0	0
Formate dehydrogenase-O major subunit OS=Escherichia coli (strain K12) OX=83333 GN=fdoG PE=1 SV=5	P32176	fdoG	113 kDa	9910400	30634000	17638000	64077000	51108000	41108000	0	9109800	7782400	46836000	20615000	28573000	33603000	35893000	50209000	11839000	13401000	17384000	71477000	48629000	42575000
Sulfur carrier protein FdhD OS=Escherichia coli (strain K12) OX=83333 GN=fdhD PE=1 SV=1	P32177	fdhD	31 kDa	0	0	0	10459000	7577500	0	0	0	0	6449100	0	0	0	0	0	10454000	6820400	17264000	5135100	15569000	0
Phosphoglycolate phosphatase OS=Escherichia coli (strain K12) OX=83333 GN=gph PE=1 SV=1	P32662	gph	27 kDa	67908000	81792000	81222000	47106000	48311000	44230000	0	29690000	34331000	9895700	5470400	0	0	7785100	22451000	8216200	0	20316000	0	37429000	10506000
NAD-capped RNA hydrolase NudC OS=Escherichia coli (strain K12) OX=83333 GN=nudC PE=1 SV=2	P32664	nudC	30 kDa	20929000	13372000	18264000	17079000	14524000	20523000	8171500	3283000	27728000	12148000	12939000	14198000	1878600	3275200	1691200	10429000	7200500	12967000	6346700	5819600	2763700
Fructose-6-phosphate aldolase 2 OS=Escherichia coli (strain K12) OX=83333 GN=fsaB PE=1 SV=1	P32669	fsaB	24 kDa	0	0	0	5649300	9351200	2365500	0	0	0	7584200	3546000	0	0	0	0	6117900	9738300	18269000	16590000	0	10355000
Uncharacterized protein YjaG OS=Escherichia coli (strain K12) OX=83333 GN=yjaG PE=4 SV=1	P32680	yjaG	23 kDa	62413000	87731000	12100000	26420000	62595000	0	43436000	34857000	48731000	60639000	45378000	60573000	36720000	10027000	42138000	63189000	64911000	76662000	66062000	0	59918000
Dual-specificity RNA pseudouridine synthase RluF OS=Escherichia coli (strain K12) OX=83333 GN=rluF PE=1 SV=1	P32684	rluF	32 kDa	29709000	19193000	21642000	20093000	35773000	22590000	22655000	21551000	16944000	19832000	18322000	17941000	42432000	88610000	50157000	57572000	67650000	79785000	58451000	36782000	56493000
tRNA-dihydrouridine(20/20a) synthase OS=Escherichia coli (strain K12) OX=83333 GN=dusA PE=1 SV=4	P32695	dusA	38 kDa	57089000	44299000	37970000	78431000	67092000	53321000	41174000	53619000	59330000	43046000	44648000	48356000	48479000	73872000	50739000	46020000	56616000	74542000	57904000	137030000	41640000
DNA gyrase inhibitor OS=Escherichia coli (strain K12) OX=83333 GN=sbmC PE=1 SV=1	P33012	sbmC	18 kDa	27292000	38545000	21253000	164670000	120840000	83938000	15356000	18235000	15899000	49474000	45729000	40135000	9631100	16057000	8657900	20427000	52459000	28610000	19256000	46810000	49975000
S-formylglutathione hydrolase YeiG OS=Escherichia coli (strain K12) OX=83333 GN=yeiG PE=1 SV=1	P33018	yeiG	31 kDa	28135000	49939000	28897000	15911000	19042000	19778000	7670000	15158000	26567000	7148000	6278000	12636000	39703000	53635000	33955000	34122000	19136000	56438000	18417000	14509000	12371000
Pseudouridine-5'-phosphate glycosidase OS=Escherichia coli (strain K12) OX=83333 GN=psuG PE=1 SV=1	P33025	psuG	33 kDa	0	0	0	0	0	0	0	0	0	12591000	6510900	6589700	0	0	0	25406000	22003000	0	8788500	0	0
Uncharacterized oxidoreductase YeiQ OS=Escherichia coli (strain K12) OX=83333 GN=yeiQ PE=3 SV=1	P33029	yeiQ	54 kDa	0	0	0	0	0	0	0	0	0	0	0	0	0	0	0	0	0	0	0	0	0
Zinc chaperone YeiR OS=Escherichia coli (strain K12) OX=83333 GN=yeiR PE=1 SV=2	P33030	yeiR	36 kDa	195700000	237240000	154360000	11071000	10892000	5579200	0	4486000	116210000	0	7794400	10671000	0	5917300	4190200	1323400	5050500	20971000	4037300	3134100	3694000
Glucans biosynthesis protein G OS=Escherichia coli (strain K12) OX=83333 GN=mdoG PE=1 SV=1	P33136	mdoG	58 kDa	330530000	361070000	291300000	227620000	186610000	159620000	318150000	266950000	364910000	296230000	249570000	301430000	286060000	410470000	329130000	319930000	390850000	523590000	341720000	439060000	349710000
Glycine dehydrogenase (decarboxylating) OS=Escherichia coli (strain K12) OX=83333 GN=gcvP PE=1 SV=3	P33195	gcvP	104 kDa	1291600000	1445700000	1094200000	795830000	654460000	552390000	673760000	475410000	536270000	743150000	772800000	798960000	804430000	1367300000	818890000	1868300000	1522300000	1410300000	1094800000	1275800000	1211700000
Inner membrane protein YebE OS=Escherichia coli (strain K12) OX=83333 GN=yebE PE=1 SV=2	P33218	yebE	24 kDa	7908000	0	5747900	12659000	4803100	7924500	0	0	0	0	3371100	0	0	0	3619800	6957300	10432000	8499800	18270000	10139000	19316000
Protein YebF OS=Escherichia coli (strain K12) OX=83333 GN=yebF PE=1 SV=2	P33219	yebF	13 kDa	135210000	84120000	76242000	129500000	106040000	37940000	44430000	6130900	2069100	0	0	0	0	0	0	0	0	0	0	0	0
Formate-dependent phosphoribosylglycinamide formyltransferase OS=Escherichia coli (strain K12) OX=83333 GN=purT PE=1 SV=3	P33221	purT	42 kDa	5434700	5435000	6236800	17211000	5318700	5973700	3558500	6846900	3198400	15922000	12426000	20677000	11873000	4915600	10376000	4321900	11750000	5808100	4341200	4187600	8643000
Putative acyl-CoA dehydrogenase AidB OS=Escherichia coli (strain K12) OX=83333 GN=aidB PE=1 SV=3	P33224	aidB	61 kDa	4660900	10020000	2057300	149820000	62819000	208750000	7884100	8284900	11243000	63407000	193180000	63931000	0	0	0	0	198880000	0	0	0	0
L-lactate permease OS=Escherichia coli (strain K12) OX=83333 GN=lldP PE=1 SV=1	P33231	lldP	59 kDa	0	0	0	0	0	0	0	0	0	0	0	0	0	0	25345000	0	0	0	0	0	0
L-lactate dehydrogenase OS=Escherichia coli (strain K12) OX=83333 GN=lldD PE=1 SV=1	P33232	lldD	43 kDa	2250200000	2203900000	1765000000	3639100000	2834300000	2034600000	0	0	0	0	0	0	1570400000	2148400000	1550900000	2094900000	1904600000	2235300000	18121000	0	0
Uncharacterized protein YehS OS=Escherichia coli (strain K12) OX=83333 GN=yehS PE=4 SV=1	P33355	yehS	18 kDa	9132300	23622000	17296000	12365000	15620000	4967500	21556000	16811000	6509500	15241000	15216000	5694100	11200000	28989000	29456000	43682000	38975000	16823000	14119000	7193000	35198000
Glycine betaine-binding protein YehZ OS=Escherichia coli (strain K12) OX=83333 GN=yehZ PE=1 SV=1	P33362	yehZ	33 kDa	300230000	311300000	274560000	163350000	154280000	108620000	58219000	46287000	38574000	15781000	31417000	27022000	0	0	0	0	4357200	0	0	0	0
Periplasmic beta-glucosidase OS=Escherichia coli (strain K12) OX=83333 GN=bglX PE=3 SV=2	P33363	bglX	83 kDa	63675000	62838000	53958000	58658000	41758000	44531000	145640000	126050000	172460000	117440000	113330000	103240000	122400000	250980000	174800000	166540000	223090000	193460000	84432000	183790000	138290000
Uncharacterized oxidoreductase YohF OS=Escherichia coli (strain K12) OX=83333 GN=yohF PE=1 SV=2	P33368	yohF	27 kDa	33276000	41596000	37204000	75105000	0	45363000	0	5042400	6785100	6209600	0	11896000	0	0	0	0	0	0	0	0	0
Transketolase 2 OS=Escherichia coli (strain K12) OX=83333 GN=tktB PE=1 SV=1	P33570	tktB	73 kDa	2011900000	1951000000	1769200000	1601600000	919360000	786850000	1048600000	853950000	764720000	1035800000	796170000	840080000	787320000	1009900000	751460000	940820000	804980000	984780000	764750000	1251700000	763510000
Nickel-binding periplasmic protein OS=Escherichia coli (strain K12) OX=83333 GN=nikA PE=1 SV=1	P33590	nikA	59 kDa	17912000	29540000	6102100	122880000	91594000	84815000	22916000	22730000	5549800	171370000	83005000	104950000	0	0	0	0	0	0	0	0	0
Nickel import ATP-binding protein NikD OS=Escherichia coli (strain K12) OX=83333 GN=nikD PE=3 SV=2	P33593	nikD	27 kDa	0	0	0	12988000	0	0	0	0	0	8214300	16063000	6547800	0	0	0	0	0	0	0	0	0
Nickel import ATP-binding protein NikE OS=Escherichia coli (strain K12) OX=83333 GN=nikE PE=3 SV=2	P33594	nikE	30 kDa	0	0	0	13831000	9746200	9170700	0	0	0	6925800	8350500	5304300	0	0	0	0	0	0	0	0	0
NADH-quinone oxidoreductase subunit C/D OS=Escherichia coli (strain K12) OX=83333 GN=nuoC PE=1 SV=3	P33599	nuoC	68 kDa	173020000	160760000	121350000	220320000	181280000	131620000	40496000	42464000	65398000	139760000	73536000	105500000	51035000	73505000	65106000	176980000	105740000	192220000	172720000	103180000	91498000
NADH-quinone oxidoreductase subunit G OS=Escherichia coli (strain K12) OX=83333 GN=nuoG PE=1 SV=4	P33602	nuoG	100 kDa	137580000	129280000	112340000	388480000	221100000	175180000	31645000	24109000	28788000	150790000	97208000	128800000	46790000	102060000	64940000	208420000	225600000	277890000	217380000	147280000	188430000
Ribosomal large subunit pseudouridine synthase D OS=Escherichia coli (strain K12) OX=83333 GN=rluD PE=1 SV=4	P33643	rluD	37 kDa	201650000	210910000	219700000	187160000	105360000	127300000	116270000	110430000	129200000	99185000	52578000	87671000	37911000	63725000	30206000	82449000	86901000	93229000	86252000	96488000	74858000
Purine nucleoside phosphorylase YfiH OS=Escherichia coli (strain K12) OX=83333 GN=yfiH PE=1 SV=1	P33644	yfiH	26 kDa	16551000	12950000	13318000	59162000	35032000	36383000	18602000	17109000	12199000	12758000	2241500	21564000	7594100	15224000	9450200	16672000	16132000	62401000	11827000	21916000	37745000
Uncharacterized protein YejA OS=Escherichia coli (strain K12) OX=83333 GN=yejA PE=1 SV=3	P33913	yejA	70 kDa	10718000	0	0	0	0	0	8904200	1659800	0	3048400	0	4337200	0	4261800	0	0	1614000	0	2048400	2169700	0
Nucleoid-associated protein YejK OS=Escherichia coli (strain K12) OX=83333 GN=yejK PE=1 SV=3	P33920	yejK	38 kDa	201590000	242340000	180530000	128000000	92044000	150210000	226420000	186870000	197660000	184910000	127060000	233950000	194030000	253250000	139270000	256700000	281960000	324900000	228900000	207020000	207820000
Periplasmic nitrate reductase OS=Escherichia coli (strain K12) OX=83333 GN=napA PE=1 SV=3	P33937	napA	93 kDa	0	0	0	51744000	32831000	37840000	0	0	0	44021000	44117000	39167000	0	0	0	22001000	28347000	27396000	26750000	31130000	27048000
Malate:quinone oxidoreductase OS=Escherichia coli (strain K12) OX=83333 GN=mqo PE=1 SV=2	P33940	mqo	60 kDa	28490000	34918000	20820000	3572700	0	0	0	0	0	0	0	0	19329000	26952000	15385000	0	7118400	10558000	0	0	0
Protein YdcF OS=Escherichia coli (strain K12) OX=83333 GN=ydcF PE=1 SV=3	P34209	ydcF	30 kDa	9843600	6222000	7558100	15806000	10366000	6888100	0	0	0	0	0	24900000	0	0	6514200	23543000	0	35994000	29763000	13783000	10119000
Alkyl hydroperoxide reductase subunit F OS=Escherichia coli (strain K12) OX=83333 GN=ahpF PE=1 SV=2	P35340	ahpF	56 kDa	1512100000	1968500000	1270400000	1277400000	976460000	779000000	2339200000	1801400000	2472900000	1028800000	556720000	602550000	2912900000	4866200000	2338600000	1742000000	1035900000	1514700000	1275500000	1380500000	1243900000
N-acetylmuramoyl-L-alanine amidase AmiA OS=Escherichia coli (strain K12) OX=83333 GN=amiA PE=1 SV=1	P36548	amiA	31 kDa	15519000	27758000	25665000	10659000	7994200	7018500	39556000	29973000	40040000	6773900	5753500	5920800	10876000	16088000	25913000	5499400	6432700	9228300	0	0	31648000
Oxygen-dependent coproporphyrinogen-III oxidase OS=Escherichia coli (strain K12) OX=83333 GN=hemF PE=1 SV=1	P36553	hemF	34 kDa	12386000	15242000	5646900	13261000	4663500	4697400	20684000	20277000	26034000	0	0	3695000	4117700	0	4533600	0	0	0	5671000	0	0
Nicotinate-nucleotide--dimethylbenzimidazole phosphoribosyltransferase OS=Escherichia coli (strain K12) OX=83333 GN=cobT PE=3 SV=3	P36562	cobT	37 kDa	0	0	0	0	0	0	0	0	0	0	0	5639900	0	0	0	0	0	11615000	0	0	0
tRNA 5-carboxymethoxyuridine methyltransferase OS=Escherichia coli (strain K12) OX=83333 GN=cmoM PE=1 SV=2	P36566	cmoM	30 kDa	16095000	13056000	12507000	16470000	13104000	8113600	0	9099700	21751000	9622100	10458000	11923000	11061000	21561000	12194000	14932000	13094000	15933000	15519000	16341000	15470000
Multicopper oxidase CueO OS=Escherichia coli (strain K12) OX=83333 GN=cueO PE=1 SV=2	P36649	cueO	57 kDa	59468000	32447000	30179000	12108000	0	12194000	38627000	18882000	6960200	9050500	13576000	18905000	36553000	77789000	38851000	40312000	35402000	67365000	36254000	27481000	33022000
Curved DNA-binding protein OS=Escherichia coli (strain K12) OX=83333 GN=cbpA PE=1 SV=2	P36659	cbpA	34 kDa	27375000	48472000	38212000	484030000	342340000	208600000	6977400	8238300	9769300	159210000	150480000	179180000	6997600	0	0	37369000	46366000	52664000	35997000	32449000	34998000
PTS system trehalose-specific EIIBC component OS=Escherichia coli (strain K12) OX=83333 GN=treB PE=1 SV=4	P36672	treB	51 kDa	101160000	171270000	124840000	331490000	280190000	225040000	42683000	52368000	67639000	328770000	218510000	256070000	152570000	201140000	142920000	191630000	249450000	349440000	389420000	220620000	252330000
HTH-type transcriptional regulator TreR OS=Escherichia coli (strain K12) OX=83333 GN=treR PE=1 SV=2	P36673	treR	35 kDa	0	0	0	0	0	0	0	0	0	0	0	0	0	0	0	0	0	0	0	0	0
Cell division protein ZapD OS=Escherichia coli (strain K12) OX=83333 GN=zapD PE=1 SV=2	P36680	zapD	28 kDa	13798000	19387000	0	92130000	72037000	43742000	0	0	0	29648000	27519000	38281000	0	3974900	1701500	12764000	39153000	23685000	48384000	31733000	28869000
Aconitate hydratase B OS=Escherichia coli (strain K12) OX=83333 GN=acnB PE=1 SV=3	P36683	acnB	94 kDa	2308500000	1798300000	3629300000	2058100000	2165100000	2002600000	484080000	702700000	739090000	1272400000	1100800000	1214900000	6264500000	8421800000	3538100000	10291000000	6685800000	8090700000	7795100000	6610900000	7332500000
Recombination-associated protein RdgC OS=Escherichia coli (strain K12) OX=83333 GN=rdgC PE=1 SV=1	P36767	rdgC	34 kDa	243720000	286370000	311150000	154700000	160760000	125000000	233460000	198860000	214200000	84952000	118560000	103770000	219210000	276370000	220320000	160990000	170260000	224420000	201150000	186750000	147540000
Probable HTH-type transcriptional regulator LrhA OS=Escherichia coli (strain K12) OX=83333 GN=lrhA PE=1 SV=2	P36771	lrhA	35 kDa	0	58045000	51390000	0	38563000	0	0	0	0	0	0	20759000	0	0	0	16586000	11901000	15301000	33576000	16655000	24565000
Uncharacterized ABC transporter ATP-binding protein YadG OS=Escherichia coli (strain K12) OX=83333 GN=yadG PE=1 SV=1	P36879	yadG	35 kDa	0	4063900	0	5696100	3803800	6361200	0	12015000	0	0	0	3089000	0	6206100	11877000	5711500	4292900	9082100	8900700	0	2344500
Uncharacterized chaperone protein YegD OS=Escherichia coli (strain K12) OX=83333 GN=yegD PE=3 SV=2	P36928	yegD	49 kDa	0	0	0	0	0	0	0	4386000	16878000	0	0	0	2380000	2663200	1525000	0	0	0	0	0	0
Ribosomal RNA small subunit methyltransferase B OS=Escherichia coli (strain K12) OX=83333 GN=rsmB PE=1 SV=2	P36929	rsmB	48 kDa	85938000	130850000	264170000	215630000	86533000	93917000	62728000	68665000	89206000	112960000	81554000	94223000	67044000	97281000	70819000	121630000	71672000	69433000	117910000	65998000	99516000
Phosphoglucomutase OS=Escherichia coli (strain K12) OX=83333 GN=pgm PE=1 SV=1	P36938	pgm	58 kDa	548400000	578310000	531850000	408980000	313230000	256080000	421590000	401950000	414760000	354940000	337040000	356630000	537410000	686850000	505470000	904860000	908080000	826360000	770880000	890940000	706980000
Dual-specificity RNA methyltransferase RlmN OS=Escherichia coli (strain K12) OX=83333 GN=rlmN PE=1 SV=1	P36979	rlmN	43 kDa	51262000	60627000	50147000	52097000	64337000	49759000	24364000	23047000	31415000	76445000	73166000	80186000	5306800	5635100	11264000	73201000	66345000	91959000	79900000	55437000	64017000
Cold shock-like protein CspB OS=Escherichia coli (strain K12) OX=83333 GN=cspB PE=1 SV=1	P36995	cspB	8 kDa	0	0	0	0	0	0	28932000	17760000	22906000	0	0	0	0	0	0	0	0	0	0	0	0
23S rRNA (guanine(745)-N(1))-methyltransferase OS=Escherichia coli (strain K12) OX=83333 GN=rlmA PE=1 SV=1	P36999	rlmA	30 kDa	39917000	26702000	29953000	18380000	3811000	15374000	20130000	22034000	34450000	0	0	26494000	19301000	33471000	23495000	17184000	17315000	14281000	0	0	0
Uncharacterized tRNA/rRNA methyltransferase LasT OS=Escherichia coli (strain K12) OX=83333 GN=lasT PE=3 SV=2	P37005	lasT	25 kDa	27323000	49992000	31463000	67680000	50469000	35123000	5141900	6248100	0	11820000	21643000	32849000	8846200	14266000	9504500	49108000	19601000	56653000	39462000	27187000	27608000
ATP-dependent RNA helicase HrpB OS=Escherichia coli (strain K12) OX=83333 GN=hrpB PE=1 SV=3	P37024	hrpB	89 kDa	0	0	0	0	0	0	0	0	2487000	0	0	0	3237700	0	0	0	0	0	0	0	0
Formyltetrahydrofolate deformylase OS=Escherichia coli (strain K12) OX=83333 GN=purU PE=1 SV=1	P37051	purU	32 kDa	474570000	456120000	447180000	349550000	125550000	118600000	267440000	215960000	264130000	234220000	238690000	197520000	265360000	256700000	175350000	183780000	192460000	414500000	175410000	210570000	172240000
Peptidase B OS=Escherichia coli (strain K12) OX=83333 GN=pepB PE=1 SV=2	P37095	pepB	46 kDa	1331000000	1470000000	1585800000	653000000	478930000	438940000	1284200000	1139000000	1227400000	648240000	506510000	581550000	1157800000	1916000000	1413300000	885460000	924310000	985500000	692330000	920540000	655580000
GDP-mannose pyrophosphatase OS=Escherichia coli (strain K12) OX=83333 GN=nudK PE=1 SV=2	P37128	nudK	22 kDa	33686000	1397200000	1287600000	1825500000	1221100000	1105600000	1061200000	1260600000	1251900000	1512100000	1343300000	1348100000	1133000000	1753000000	1387200000	1030200000	1288100000	1599800000	1123900000	1248700000	1345700000
Ribonucleoside-diphosphate reductase 2 subunit beta OS=Escherichia coli (strain K12) OX=83333 GN=nrdF PE=1 SV=2	P37146	nrdF	36 kDa	102560000	91676000	81002000	0	0	0	3010800	2229700	2086100	0	0	0	5896700	5500600	7004700	0	0	0	0	0	0
Phosphoenolpyruvate-dependent phosphotransferase system OS=Escherichia coli (strain K12) OX=83333 GN=ptsP PE=1 SV=2	P37177	ptsP	84 kDa	0	0	0	22008000	18593000	19722000	0	0	0	28766000	25035000	33690000	1347500	0	0	27269000	24629000	47580000	26962000	18737000	31597000
Hydrogenase 2 maturation protease OS=Escherichia coli (strain K12) OX=83333 GN=hybD PE=1 SV=2	P37182	hybD	18 kDa	0	0	0	56531000	50807000	25478000	0	0	0	71756000	36141000	55136000	0	0	0	31095000	32942000	38438000	65870000	66893000	52350000
PTS system galactitol-specific EIIB component OS=Escherichia coli (strain K12) OX=83333 GN=gatB PE=1 SV=2	P37188	gatB	10 kDa	0	0	24957000	149430000	276470000	223890000	0	2083000	0	121370000	353540000	570030000	0	0	0	0	0	0	0	0	0
Outer membrane protein Slp OS=Escherichia coli (strain K12) OX=83333 GN=slp PE=1 SV=1	P37194	slp	21 kDa	0	0	0	38058000	30572000	27657000	4138900	4522100	7199500	60547000	48561000	61505000	0	0	0	0	0	0	0	0	0
HTH-type transcriptional regulator DctR OS=Escherichia coli (strain K12) OX=83333 GN=dctR PE=1 SV=1	P37195	dctR	20 kDa	0	0	0	13924000	12222000	3542300	0	0	0	3758100	12781000	11336000	0	0	0	0	0	0	0	0	0
Arsenical resistance operon repressor OS=Escherichia coli (strain K12) OX=83333 GN=arsR PE=3 SV=1	P37309	arsR	13 kDa	6280000000	5155000000	3580300000	26607000000	9887800000	8437800000	0	0	0	0	0	0	69475000	138610000	81191000	128830000	193880000	226700000	7368600	0	0
Prophage integrase IntS OS=Escherichia coli (strain K12) OX=83333 GN=intS PE=1 SV=1	P37326	intS	44 kDa	4876800	4799000	4540700	0	10461000	0	10118000	5713500	6742100	0	2235900	10457000	9104800	14656000	4561100	4412100	5302300	11935000	3384600	119320000	4731300
Molybdate-binding protein ModA OS=Escherichia coli (strain K12) OX=83333 GN=modA PE=1 SV=1	P37329	modA	27 kDa	99148000	76739000	99746000	92889000	68665000	62540000	103290000	81453000	94477000	61038000	63718000	49781000	170130000	243540000	184970000	115690000	182450000	175070000	159300000	179010000	155640000
Malate synthase G OS=Escherichia coli (strain K12) OX=83333 GN=glcB PE=1 SV=3	P37330	glcB	80 kDa	339840000	409780000	214840000	1737600000	1122900000	907470000	74588000	61833000	72688000	109600000	82626000	83325000	187000000	195050000	156360000	1032600000	2489600000	5411000000	1533400000	1308800000	2756400000
L-2-hydroxyglutarate dehydrogenase OS=Escherichia coli (strain K12) OX=83333 GN=lhgD PE=1 SV=3	P37339	lhgD	46 kDa	2103100	0	482950	700620	11725000	1439900	0	1585000	0	1349500	0	375950	0	449220	0	0	1302600	421520	309600	1243600	4443500
Uncharacterized protein YjjI OS=Escherichia coli (strain K12) OX=83333 GN=yjjI PE=1 SV=2	P37342	yjjI	58 kDa	24486000	30272000	7162900	193300000	159460000	136450000	15484000	16265000	0	212550000	221930000	197760000	0	0	2009700	0	0	0	0	0	0
PEP-dependent dihydroxyacetone kinase, phosphoryl donor subunit DhaM OS=Escherichia coli (strain K12) OX=83333 GN=dhaM PE=1 SV=3	P37349	dhaM	51 kDa	42385000	61865000	36977000	48220000	25676000	34269000	66113000	56362000	63332000	52591000	74285000	66076000	75265000	98537000	80670000	96318000	58461000	91644000	70092000	52489000	60187000
Ribose-5-phosphate isomerase B OS=Escherichia coli (strain K12) OX=83333 GN=rpiB PE=1 SV=2	P37351	rpiB	16 kDa	0	0	0	8435900	6454900	6031700	0	0	0	5103600	7378900	5856900	0	0	0	3649700	5086600	11363000	10535000	7145000	6666000
2-succinylbenzoate--CoA ligase OS=Escherichia coli (strain K12) OX=83333 GN=menE PE=1 SV=2	P37353	menE	50 kDa	0	0	0	0	0	0	0	1370200	0	0	0	3793900	0	0	0	0	2319800	3918000	0	0	0
D-xylose-binding periplasmic protein OS=Escherichia coli (strain K12) OX=83333 GN=xylF PE=1 SV=1	P37387	xylF	36 kDa	0	0	0	13606000	15073000	9852500	5057300	4000300	6821200	29395000	37344000	17673000	70098000	158550000	67376000	136890000	178460000	364050000	152820000	122420000	163500000
Oxidoreductase UcpA OS=Escherichia coli (strain K12) OX=83333 GN=ucpA PE=1 SV=3	P37440	ucpA	28 kDa	93505000	98923000	89011000	376750000	312250000	242260000	145760000	95842000	119400000	332910000	209140000	275560000	305650000	459960000	371110000	809850000	455290000	1160300000	893260000	500380000	823730000
Isoaspartyl peptidase OS=Escherichia coli (strain K12) OX=83333 GN=iaaA PE=1 SV=2	P37595	iaaA	33 kDa	8390200	10620000	0	6418400	7706400	18840000	7245400	7855300	9229100	5234200	4204200	5170600	7075700	8452900	6290900	11150000	2982300	3366700	3010500	0	0
PanD regulatory factor OS=Escherichia coli (strain K12) OX=83333 GN=panZ PE=1 SV=1	P37613	panZ	15 kDa	308440000	477210000	73490000	295270000	14415000	10005000	48292000	36535000	48804000	16366000	37332000	282040000	8952000	327950000	42865000	15195000	266180000	216190000	18520000	144650000	14530000
Zinc/cadmium/lead-transporting P-type ATPase OS=Escherichia coli (strain K12) OX=83333 GN=zntA PE=1 SV=1	P37617	zntA	77 kDa	1095100	0	2266400	47676000	22315000	20449000	19293000	2936600	3390300	23025000	12103000	25566000	0	6416900	5845200	7582000	33392000	13645000	6211000	0	0
Uncharacterized protein YhiI OS=Escherichia coli (strain K12) OX=83333 GN=yhiI PE=3 SV=1	P37626	yhiI	39 kDa	0	0	0	6783000	0	2297200	0	0	0	5843200	8291300	2305900	0	0	0	4283900	0	7088900	13452000	0	4635000
Uncharacterized protein YhiN OS=Escherichia coli (strain K12) OX=83333 GN=yhiN PE=4 SV=3	P37631	yhiN	44 kDa	18055000	14650000	13617000	26762000	12343000	10441000	23160000	21015000	24526000	6770700	13560000	15456000	19798000	26056000	25869000	3778300	14963000	17019000	13586000	14547000	12413000
Ribosomal RNA large subunit methyltransferase J OS=Escherichia coli (strain K12) OX=83333 GN=rlmJ PE=1 SV=1	P37634	rlmJ	32 kDa	124880000	144990000	127570000	97040000	62509000	59287000	99681000	87016000	112790000	51532000	60219000	50481000	103030000	81382000	111560000	66131000	86482000	91576000	81526000	64533000	86094000
Multidrug resistance protein MdtE OS=Escherichia coli (strain K12) OX=83333 GN=mdtE PE=1 SV=1	P37636	mdtE	41 kDa	22947000	34106000	0	4706400	5913800	1343700	0	0	0	0	2363200	1020700	0	0	0	0	0	0	0	0	0
Multidrug resistance protein MdtF OS=Escherichia coli (strain K12) OX=83333 GN=mdtF PE=1 SV=1	P37637	mdtF	112 kDa	0	0	0	7287600	5241900	4828200	0	0	0	3262900	0	4534700	0	0	0	0	0	0	0	0	0
HTH-type transcriptional regulator GadX OS=Escherichia coli (strain K12) OX=83333 GN=gadX PE=1 SV=1	P37639	gadX	32 kDa	0	0	0	17634000	5854500	9309500	0	0	0	14017000	9603400	15849000	0	0	0	0	0	0	0	0	0
AsmA family protein YhjG OS=Escherichia coli (strain K12) OX=83333 GN=yhjG PE=3 SV=3	P37645	yhjG	74 kDa	0	0	0	0	0	0	0	0	0	0	0	0	0	2820500	0	0	0	0	0	0	2406200
2-dehydro-3-deoxygluconokinase OS=Escherichia coli (strain K12) OX=83333 GN=kdgK PE=1 SV=1	P37647	kdgK	34 kDa	68250000	89134000	72224000	65883000	62564000	42214000	68585000	76019000	65018000	62107000	42541000	54891000	109530000	180950000	88976000	121110000	73437000	145740000	140900000	111020000	150340000
Protein YhjJ OS=Escherichia coli (strain K12) OX=83333 GN=yhjJ PE=1 SV=1	P37648	yhjJ	56 kDa	53801000	72972000	62518000	45979000	46876000	46688000	22494000	20281000	18501000	46003000	37268000	46980000	20054000	49010000	30386000	38130000	67279000	72514000	57777000	30499000	48455000
Glyoxylate/hydroxypyruvate reductase B OS=Escherichia coli (strain K12) OX=83333 GN=ghrB PE=1 SV=3	P37666	ghrB	35 kDa	1358100000	1345300000	1367300000	532950000	414950000	366520000	626270000	615650000	723360000	338200000	330170000	267170000	1157900000	1693900000	898100000	566400000	514270000	546070000	285250000	508720000	444290000
DNA-binding transcriptional repressor YiaJ OS=Escherichia coli (strain K12) OX=83333 GN=yiaJ PE=1 SV=1	P37671	yiaJ	31 kDa	0	0	2333900	0	0	0	0	0	0	11521000	3083200	9423500	0	0	0	8567200	9687500	10645000	6408600	10739000	9336500
2,3-diketo-L-gulonate reductase OS=Escherichia coli (strain K12) OX=83333 GN=dlgD PE=1 SV=2	P37672	dlgD	37 kDa	0	0	0	0	0	0	0	0	0	0	0	0	0	0	0	5850100	4427900	17950000	10724000	0	3196600
Aldehyde dehydrogenase B OS=Escherichia coli (strain K12) OX=83333 GN=aldB PE=1 SV=2	P37685	aldB	56 kDa	80235000	88218000	140780000	289330000	219370000	171630000	86920000	51852000	59629000	100360000	100460000	103930000	82095000	82414000	27300000	76764000	48051000	71964000	78497000	50698000	61914000
2,3-bisphosphoglycerate-independent phosphoglycerate mutase OS=Escherichia coli (strain K12) OX=83333 GN=gpmI PE=1 SV=1	P37689	gpmI	56 kDa	1149400000	1267200000	1071200000	1253500000	1101800000	934120000	864850000	816830000	931960000	642540000	760900000	647860000	729690000	1017600000	762340000	523270000	472920000	539350000	554560000	615440000	584360000
Murein hydrolase activator EnvC OS=Escherichia coli (strain K12) OX=83333 GN=envC PE=1 SV=2	P37690	envC	47 kDa	0	0	0	8760800	0	0	0	0	0	0	0	0	0	0	0	0	3199100	0	3314400	0	0
Lipopolysaccharide heptosyltransferase 2 OS=Escherichia coli (strain K12) OX=83333 GN=waaF PE=1 SV=1	P37692	waaF	39 kDa	9324500	9713200	0	5826000	18806000	2074200	3419700	0	0	0	0	7193400	4563800	16515000	6442700	0	0	0	0	0	0
Glucose-1-phosphate thymidylyltransferase 1 OS=Escherichia coli (strain K12) OX=83333 GN=rfbA PE=1 SV=2	P37744	rfbA	33 kDa	418030000	423540000	336640000	450490000	404770000	321700000	371650000	360580000	397040000	383730000	360380000	327350000	302450000	365440000	277030000	332420000	338020000	587900000	316990000	507920000	369200000
dTDP-4-dehydrorhamnose 3,5-epimerase OS=Escherichia coli (strain K12) OX=83333 GN=rfbC PE=1 SV=1	P37745	rfbC	21 kDa	14628000	25422000	17869000	144810000	145850000	163500000	98034000	39166000	94135000	154070000	56318000	169750000	43332000	49379000	77650000	139840000	159270000	80053000	114570000	139860000	100390000
UDP-galactopyranose mutase OS=Escherichia coli (strain K12) OX=83333 GN=glf PE=1 SV=1	P37747	glf	43 kDa	359910000	445280000	377230000	644830000	397750000	255090000	259420000	284800000	345050000	369690000	285520000	337720000	322980000	450590000	300590000	460760000	448530000	746020000	497490000	353330000	390550000
Beta-1,6-galactofuranosyltransferase WbbI OS=Escherichia coli (strain K12) OX=83333 GN=wbbI PE=1 SV=1	P37749	wbbI	38 kDa	17303000	23438000	17143000	77589000	57459000	49162000	15630000	13494000	24639000	17683000	25579000	67344000	11709000	28201000	22815000	25574000	24544000	36039000	33290000	14831000	12597000
Putative lipopolysaccharide biosynthesis O-acetyl transferase WbbJ OS=Escherichia coli (strain K12) OX=83333 GN=wbbJ PE=3 SV=2	P37750	wbbJ	22 kDa	0	0	0	34209000	11964000	6333800	0	0	10933000	2264500	0	0	14760000	0	0	0	0	0	0	0	0
Putative glycosyltransferase WbbK OS=Escherichia coli (strain K12) OX=83333 GN=wbbK PE=4 SV=1	P37751	wbbK	43 kDa	0	0	0	21018000	8502600	7811300	3164000	2107300	0	6603700	9514100	14851000	0	0	0	23904000	20461000	39259000	11979000	0	0
Uncharacterized isomerase YddE OS=Escherichia coli (strain K12) OX=83333 GN=yddE PE=1 SV=2	P37757	yddE	32 kDa	9849100	14639000	9617800	0	5557700	3239600	6911200	17483000	0	4167600	3164600	3522200	6460800	0	7434900	12155000	0	0	0	0	0
dTDP-glucose 4,6-dehydratase 1 OS=Escherichia coli (strain K12) OX=83333 GN=rfbB PE=3 SV=2	P37759	rfbB	41 kDa	741430000	766360000	760630000	685230000	582870000	405070000	449360000	459320000	512520000	481660000	409790000	479980000	389280000	661740000	480270000	638830000	468890000	927440000	520750000	361730000	376960000
dTDP-4-dehydrorhamnose reductase OS=Escherichia coli (strain K12) OX=83333 GN=rfbD PE=3 SV=2	P37760	rfbD	33 kDa	136600000	53859000	100350000	154210000	114390000	96430000	111560000	117820000	161490000	151690000	125390000	146880000	41700000	120200000	75622000	174510000	145390000	180300000	140930000	182940000	118850000
Ribosomal large subunit pseudouridine synthase B OS=Escherichia coli (strain K12) OX=83333 GN=rluB PE=1 SV=2	P37765	rluB	33 kDa	44606000	165750000	135820000	198980000	155390000	151540000	258370000	272830000	291540000	231010000	177560000	207690000	163080000	247540000	176640000	132900000	136270000	206820000	143050000	155090000	141960000
Uncharacterized HTH-type transcriptional regulator YfhH OS=Escherichia coli (strain K12) OX=83333 GN=yfhH PE=4 SV=2	P37767	yfhH	31 kDa	4853400	0	4621000	9034000	4154100	4042500	0	0	2616500	0	4602000	4407600	0	0	0	0	0	0	0	0	0
2-dehydro-3-deoxy-D-gluconate 5-dehydrogenase OS=Escherichia coli (strain K12) OX=83333 GN=kduD PE=1 SV=2	P37769	kduD	27 kDa	20304000	11339000	57599000	91544000	5215700	11621000	6431500	3630800	34109000	2785400	1968600	4389400	6687900	7332800	3755300	12770000	7450400	5432600	16048000	13670000	9296400
UDP-N-acetylmuramate--L-alanyl-gamma-D-glutamyl-meso-2,6-diaminoheptandioate ligase OS=Escherichia coli (strain K12) OX=83333 GN=mpl PE=1 SV=3	P37773	mpl	50 kDa	118150000	118020000	103350000	79908000	65186000	73783000	105250000	89704000	116980000	134490000	102780000	114780000	95758000	198600000	112080000	163690000	160720000	230140000	159350000	157820000	136910000
Glutamate/aspartate import solute-binding protein OS=Escherichia coli (strain K12) OX=83333 GN=gltI PE=1 SV=2	P37902	gltI	33 kDa	130500000	156460000	116680000	151720000	108920000	98212000	84691000	73152000	85086000	64623000	57650000	49643000	203990000	268690000	212730000	167280000	216100000	257500000	191020000	170510000	153030000
Universal stress protein F OS=Escherichia coli (strain K12) OX=83333 GN=uspF PE=1 SV=2	P37903	uspF	16 kDa	49132000	53611000	23181000	293790000	423730000	230000000	127400000	146760000	166560000	443350000	193760000	342700000	428220000	526070000	457000000	234850000	206220000	229930000	344560000	309040000	232670000
Sulfite reductase [NADPH] flavoprotein alpha-component OS=Escherichia coli (strain K12) OX=83333 GN=cysJ PE=1 SV=4	P38038	cysJ	66 kDa	323770000	371710000	309590000	47118000	45140000	28798000	119460000	84896000	77404000	0	4501400	0	86580000	124100000	80903000	39195000	87564000	123400000	0	0	4075700
Isochorismate synthase MenF OS=Escherichia coli (strain K12) OX=83333 GN=menF PE=1 SV=4	P38051	menF	49 kDa	7533600	8498900	83659000	37341000	17135000	21508000	4204000	24103000	3510300	26563000	37334000	30218000	0	0	21594000	24621000	15172000	39771000	13477000	11933000	19185000
Oxygen-insensitive NAD(P)H nitroreductase OS=Escherichia coli (strain K12) OX=83333 GN=nfsB PE=1 SV=1	P38489	nfsB	24 kDa	1104500000	1197200000	1124200000	542830000	431490000	263280000	256920000	381920000	264960000	378070000	495270000	335440000	1441700000	675390000	1474500000	595950000	865700000	769170000	811210000	712850000	647230000
Flap endonuclease Xni OS=Escherichia coli (strain K12) OX=83333 GN=ygdG PE=1 SV=3	P38506	ygdG	28 kDa	0	0	0	20712000	21868000	14366000	6592800	0	0	12002000	22933000	18938000	0	0	0	23496000	23046000	34482000	26040000	20739000	27346000
Uncharacterized protein YggL OS=Escherichia coli (strain K12) OX=83333 GN=yggL PE=4 SV=2	P38521	yggL	13 kDa	469710000	475840000	369460000	434200000	325060000	286860000	338890000	247650000	329320000	275440000	284720000	279980000	308080000	351670000	281370000	232830000	229770000	339250000	231420000	273090000	266110000
Periplasmic pH-dependent serine endoprotease DegQ OS=Escherichia coli (strain K12) OX=83333 GN=degQ PE=1 SV=1	P39099	degQ	47 kDa	60120000	106330000	66872000	56130000	85050000	36018000	42701000	34695000	78111000	44576000	42547000	67480000	46272000	92799000	36509000	71439000	56643000	52244000	64208000	65300000	44488000
[truncated: 461 more rows]

## Sheet: Supplemental Data Table 2
ID	Zinc	Iron	Nickel	Magnesium	Cobalt	Arsenic	Sodium	Manganese	Copper	Molybdenum	Potassium	Calcium	Other	Gene Name	GOTERM_BP_DIRECT	GOTERM_CC_DIRECT	GOTERM_MF_DIRECT	INTERPRO	KEGG_PATHWAY	PIR_SUPERFAMILY	SMART	UP_KW_BIOLOGICAL_PROCESS	UP_KW_CELLULAR_COMPONENT	UP_KW_DOMAIN	UP_KW_LIGAND	UP_KW_MOLECULAR_FUNCTION	UP_KW_PTM	UP_SEQ_FEATURE
[truncated: 1,840 more rows]
